# Supplementary material for: Supranutritional Maternal Organic Selenium Supplementation during Different Trimesters of Pregnancy Affects the Muscle Gene Transcriptome of Newborn Beef Calves in a Time-Dependent Manner
Source: MDPI journal article supplement (doi:10.3390/genes12121884), 2021-11-25
Supplement: s1 [file s1]

# Supranutritional Maternal Organic Selenium Supplementation During Different Trimesters of Pregnancy Affects the Muscle Gene Transcriptome of Newborn Beef Calves in a Time-dependent Manner

Wellison J. S. Diniz <sup>1,\*</sup>, Gerd Bobe <sup>2,3</sup>, Joseph J. Klopfenstein <sup>4</sup>, Yunus Gultekin <sup>2</sup>, T. Zane Davis <sup>5</sup>, Alison K. Ward <sup>6</sup> and Jean A. Hall <sup>7,\*</sup>

<sup>1</sup> Department of Animal Sciences, Auburn University, Auburn, AL 36849, USA

<sup>2</sup> Department of Animal and Rangeland Sciences, College of Agricultural Sciences, Oregon State University, Corvallis, OR 97331, USA; gerd.bobe@oregonstate.edu (G.B.); yunus.gultekin@oregonstate.edu (Y.G.)

<sup>3</sup> Linus Pauling Institute, Oregon State University, Corvallis, OR 97331, USA

<sup>4</sup> Department of Clinical Sciences, Carlson College of Veterinary Medicine, Oregon State University, Corvallis, OR 97331, USA; joe.klopfenstein@oregonstate.edu

<sup>5</sup> USDA-ARS-Poisonous Plant Research Lab, Logan, UT 84341, USA; zane.davis@ARS.USDA.GOV

<sup>6</sup> Department of Animal Sciences, North Dakota State University, Fargo, ND 58105, USA; alison.ward@ndsu.edu

<sup>7</sup> Department of Biomedical Sciences, Carlson College of Veterinary Medicine, Oregon State University, Corvallis, OR 97331, USA

\* Correspondence: wzd0027@auburn.edu (W.J.S.D.); jean.hall@oregonstate.edu (J.A.H.)

## Supplementary Figures

A

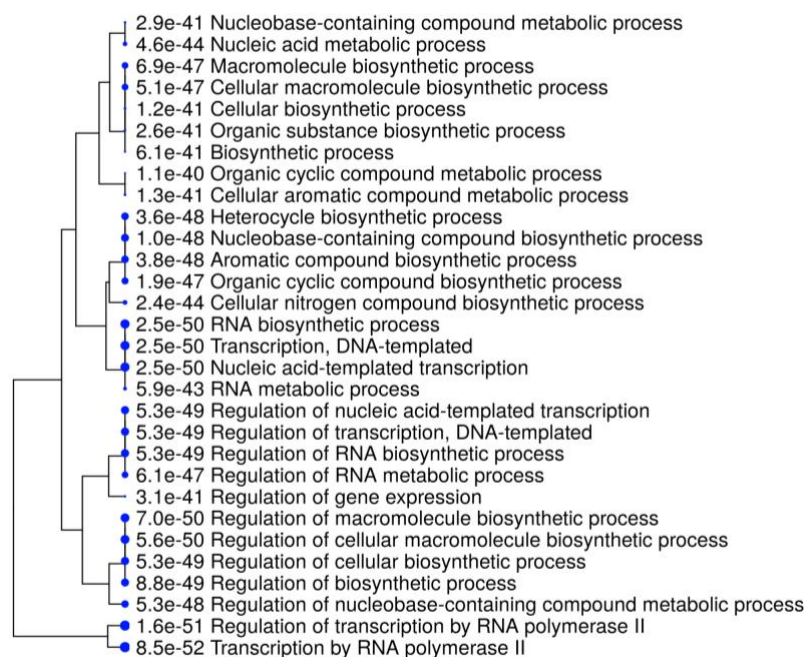

B

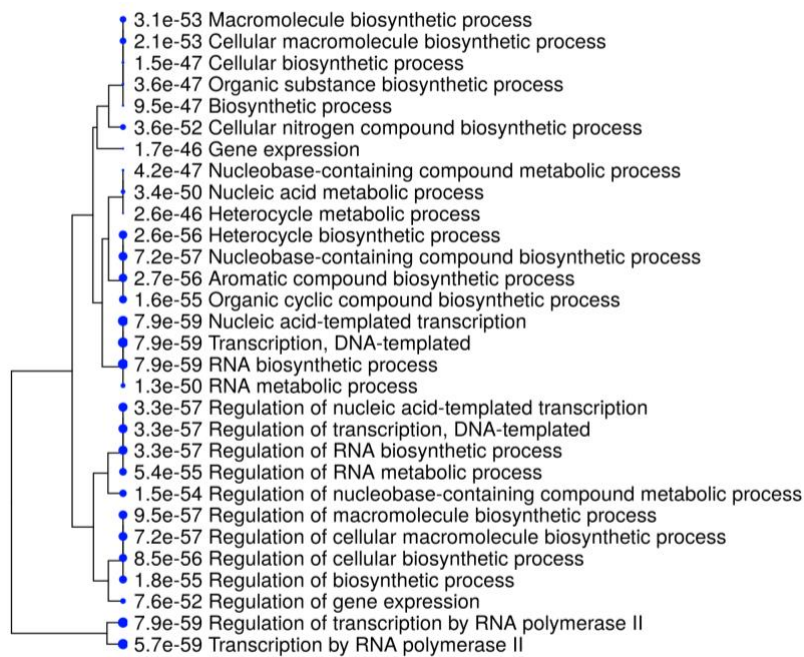

C

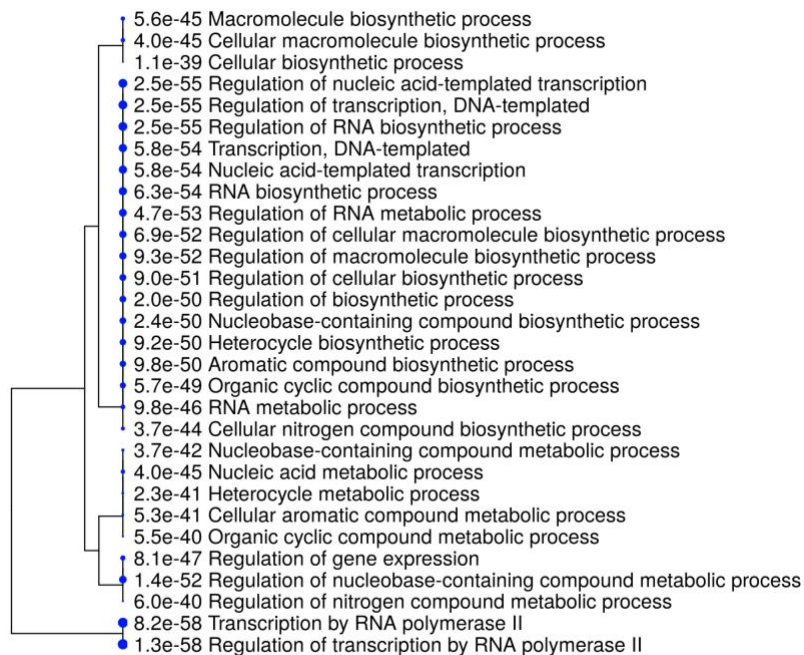

**Figure S1.** Biological processes over-represented by the key transcription factors. Contrasts were performed separately for each differentially expressed gene, comparing treatment *vs.* control. **A:** First (TR1); **B:** second (TR2); **C:** or third (TR3) trimester of gestation. The bigger the blue dot, the more significant the term is (FDR < 0.05).
