# Supplementary material for: Supranutritional Maternal Organic Selenium Supplementation during Different Trimesters of Pregnancy Affects the Muscle Gene Transcriptome of Newborn Beef Calves in a Time-Dependent Manner
Source: Genes (Basel). 2021 Nov 25;12(12):1884. doi: 10.3390/genes12121884 (PMC8701265; doi:10.3390/genes12121884)
Supplement: Supplementary file 1 [file genes-12-01884-s001.zip]

Archive with 16 entries (16 files):
- Supplementary Figures_S2.pdf
- Supplementary Figure_S1.pdf
- Supplementary Table S10_.xlsx
- Supplementary Table S11_.xlsx
- Supplementary Table S12_.xlsx
- Supplementary Table S13_.xlsx
- Supplementary Table S14_.xlsx
- Supplementary Table S1_.xlsx
- Supplementary Table S2_.xlsx
- Supplementary Table S3_.xlsx
- Supplementary Table S4_.xlsx
- Supplementary Table S5_.xlsx
- Supplementary Table S6_.xlsx
- Supplementary Table S7_.xlsx
- Supplementary Table S8_.xlsx
- Supplementary Table S9_.xlsx
