# Supplementary material for: Supranutritional Maternal Organic Selenium Supplementation during Different Trimesters of Pregnancy Affects the Muscle Gene Transcriptome of Newborn Beef Calves in a Time-Dependent Manner
Source: Genes (Basel). 2021 Nov 25;12(12):1884. doi: 10.3390/genes12121884 (PMC8701265; doi:10.3390/genes12121884)
Supplement: Supplementary file 1 [file genes-12-01884-s001.zip › Supplementary Table S1_.xlsx]

## Sheet: Description
Supranutritional Maternal Organic Selenium Supplementation During Different Trimesters of Pregnancy Affects the Muscle Gene Transcriptome of Newborn Beef Calves in a Time-dependent Manner
Wellison J. S. Diniz 1,*; Gerd Bobe 2,3; Joseph J. Klopfenstein 4; Yunus Gultekin 2; T. Zane Davis 5; Alison K. Ward 6; Jean A. Hall 7,*
1 Department of Animal Sciences, Auburn University; Auburn, AL 3849, USA; wzd0027@auburn.edu 2 Department of Animal and Rangeland Sciences, College of Agricultural Sciences, Oregon State University, Corvallis, OR, USA; yunus.gultekin@oregonstate.edu; gerd.bobe@oregonstate.edu 3 Linus Pauling Institute, Oregon State University, Corvallis, OR 97331, USA; 4 Department of Clinical Sciences, Carlson C…
Data Description
Tab. 1.	Muscle RNA sequencing summary and mapping statistics.

## Sheet: Tab. 1
Muscle RNA sequencing summary and mapping statistics
Sample ID	M Seqs	M Aligned	% Aligned	Group
A2034	22.9	22.4	0.975	CTR
A2035	22.9	22.3	0.974	CTR
A2038	20.5	19.9	0.97	CTR
A2041	20.3	19.8	0.974	CTR
A2042	21.2	20.7	0.976	CTR
A2075	19.5	19	0.976	CTR
A2088	19.8	19.4	0.978	CTR
A2091	23.8	23.3	0.978	CTR
A2096	20.3	19.8	0.978	CTR
A2098	20	19.5	0.974	CTR
A2029	20.7	20.2	0.976	TR1
A2032	20.9	20.4	0.975	TR1
A2040	22	21.4	0.976	TR1
A2047	21.4	20.8	0.972	TR1
A2052	22.2	21.7	0.976	TR1
A2057	21.4	20.9	0.978	TR1
A2058	21.6	21.1	0.976	TR1
A2067	21.3	20.8	0.977	TR1
A2092	21	20.5	0.974	TR1
A2023	19.9	19.3	0.973	TR2
A2054	23.1	22.5	0.976	TR2
A2066	25.7	25.1	0.977	TR2
A2068	21.8	21.2	0.975	TR2
A2079	21.2	20.7	0.976	TR2
A2083	20.8	20.3	0.977	TR2
A2084	20.6	20.1	0.976	TR2
A2090	21.2	20.8	0.978	TR2
A2099	19.7	19.2	0.975	TR2
A2100	26	25.3	0.976	TR2
A2020	20	19.4	0.975	TR3
A2024	21.4	20.8	0.974	TR3
A2033	22.3	21.7	0.974	TR3
A2065	22	21.5	0.977	TR3
A2073	20.7	20.2	0.976	TR3
A2074	22.2	21.7	0.978	TR3
A2085	20.2	19.8	0.978	TR3
A2087	21.2	20.7	0.979	TR3
A2102	20.9	20.4	0.976	TR3
Average	21.4368	20.9105	0.975763
