# Supplementary material for: Supranutritional Maternal Organic Selenium Supplementation during Different Trimesters of Pregnancy Affects the Muscle Gene Transcriptome of Newborn Beef Calves in a Time-Dependent Manner
Source: Genes (Basel). 2021 Nov 25;12(12):1884. doi: 10.3390/genes12121884 (PMC8701265; doi:10.3390/genes12121884)
Supplement: Supplementary file 1 [file genes-12-01884-s001.zip › Supplementary Table S2_.xlsx]

## Sheet: Description
Supranutritional Maternal Organic Selenium Supplementation During Different Trimesters of Pregnancy Affects the Muscle Gene Transcriptome of Newborn Beef Calves in a Time-dependent Manner
Wellison J. S. Diniz 1,*; Gerd Bobe 2,3; Joseph J. Klopfenstein 4; Yunus Gultekin 2; T. Zane Davis 5; Alison K. Ward 6; Jean A. Hall 7,*
1 Department of Animal Sciences, Auburn University; Auburn, AL 3849, USA; wzd0027@auburn.edu 2 Department of Animal and Rangeland Sciences, College of Agricultural Sciences, Oregon State University, Corvallis, OR, USA; yunus.gultekin@oregonstate.edu; gerd.bobe@oregonstate.edu 3 Linus Pauling Institute, Oregon State University, Corvallis, OR 97331, USA; 4 Department of Clinical Sciences, Carlson C…
Data Description
Tab 1.	Differentially expressed genes between TR1 vs. CTR groups from muscle tissue.

## Sheet: Tab. 1
Differentaily expressed genes between TR1 vs. CTR groups from muscle tissue (FDR < 0.05 and |log2 fc| > 1.5)
Ensembl ID	Gene Symbol	TR_1	CON	Diff	Gene_biotype	Status
ENSBTAG00000000033	PHOSPHO1	9.13714	9.44109	-1.9336	protein_coding	Down
ENSBTAG00000000062	RASL12	6.91143	6.54863	2.34373	protein_coding	Up
ENSBTAG00000000071	PMP2	5.15165	5.42062	-1.70922	protein_coding	Down
ENSBTAG00000000092	HIF1AN	9.80699	10.3098	-3.2094	protein_coding	Down
ENSBTAG00000000111	UGP2	11.8042	11.484	2.07078	protein_coding	Up
ENSBTAG00000000125	SPATA5	6.90932	7.26436	-2.26136	protein_coding	Down
ENSBTAG00000000160	CBS	7.04111	7.34211	-1.91472	protein_coding	Down
ENSBTAG00000000223	PPM1B	11.2232	10.9541	1.74295	protein_coding	Up
ENSBTAG00000000231	BMPR1A	10.0848	10.3641	-1.77537	protein_coding	Down
ENSBTAG00000000233	OR51E1	6.7256	7.06842	-2.18297	protein_coding	Down
ENSBTAG00000000240	AKAP7	7.19665	6.62027	3.71391	protein_coding	Up
ENSBTAG00000000243	HEBP2	5.77512	5.53097	1.58256	protein_coding	Up
ENSBTAG00000000250	HDHD3	7.94083	7.7005	1.55808	protein_coding	Up
ENSBTAG00000000251	ALAD	9.37877	9.07514	1.96415	protein_coding	Up
ENSBTAG00000000256	TLE1	8.50185	8.9059	-2.57579	protein_coding	Down
ENSBTAG00000000285	GUF1	8.17744	8.54379	-2.33393	protein_coding	Down
ENSBTAG00000000291	DHTKD1	9.83204	10.0725	-1.52632	protein_coding	Down
ENSBTAG00000000313	NUDT13	6.71493	6.97647	-1.66157	protein_coding	Down
ENSBTAG00000000328	TPPP2	4.95195	4.61713	2.16419	protein_coding	Up
ENSBTAG00000000329	MEGF10	6.73011	7.02173	-1.85456	protein_coding	Down
ENSBTAG00000000377	BMX	5.37994	5.0878	1.89046	protein_coding	Up
ENSBTAG00000000392	ASCC1	9.99589	9.58416	2.65762	protein_coding	Up
ENSBTAG00000000395	ADAMTS20	8.63101	9.04579	-2.64461	protein_coding	Down
ENSBTAG00000000434	CRYAB	13.58	14.0908	-3.26085	protein_coding	Down
ENSBTAG00000000477	TLR5	5.05532	4.8063	1.61382	protein_coding	Up
ENSBTAG00000000575	TNC	5.61926	5.38698	1.50644	protein_coding	Up
ENSBTAG00000000595	FBN3	4.94862	5.19514	-1.56524	protein_coding	Down
ENSBTAG00000000601	COL11A2	6.96701	6.67112	1.91454	protein_coding	Up
ENSBTAG00000000647	SELENOO	9.75347	9.51703	1.53312	protein_coding	Up
ENSBTAG00000000660	FAM83D	4.57908	4.98768	-2.60496	protein_coding	Down
ENSBTAG00000000671	PARP3	5.78431	5.26095	3.37374	protein_coding	Up
ENSBTAG00000000672	OTULINL	6.35873	6.03231	2.11035	protein_coding	Up
ENSBTAG00000000736	LRP8	4.90776	5.20452	-1.8875	protein_coding	Down
ENSBTAG00000000746	KAT2B	10.471	10.2189	1.63359	protein_coding	Up
ENSBTAG00000000795	NMNAT2	5.5294	5.88827	-2.28593	protein_coding	Down
ENSBTAG00000000804	MOB3B	6.97272	6.73578	1.53634	protein_coding	Up
ENSBTAG00000000868	ZFP1	5.79059	5.46877	2.08083	protein_coding	Up
ENSBTAG00000000894	PGK1	14.1213	14.6087	-3.11027	protein_coding	Down
ENSBTAG00000001003	CKMT2	13.3421	13.5795	-1.50657	protein_coding	Down
ENSBTAG00000001021	CYP1A1	6.06535	6.66548	-3.8337	protein_coding	Down
ENSBTAG00000001027	SERPINH1	9.94662	10.2944	-2.21464	protein_coding	Down
ENSBTAG00000001058	SRPK3	10.621	11.0584	-2.78955	protein_coding	Down
ENSBTAG00000001078	SRL	12.3011	12.6946	-2.50851	protein_coding	Down
ENSBTAG00000001092	PHOSPHO2	7.27596	7.04467	1.50007	protein_coding	Up
ENSBTAG00000001094	MTUS2	6.30031	6.68875	-2.47566	protein_coding	Down
ENSBTAG00000001096	PRKRA	5.97101	6.40373	-2.75972	protein_coding	Down
ENSBTAG00000001097	FKBP7	6.30451	6.65231	-2.21495	protein_coding	Down
ENSBTAG00000001105	ANXA4	9.1355	8.86458	1.75433	protein_coding	Up
ENSBTAG00000001116	P4HA2	8.19349	8.46777	-1.74334	protein_coding	Down
ENSBTAG00000001117	ANKRD50	6.59317	6.88796	-1.87486	protein_coding	Down
ENSBTAG00000001143		4.93277	5.17967	-1.56763	protein_coding	Down
ENSBTAG00000001153	TLE2	7.27355	6.99603	1.79664	protein_coding	Up
ENSBTAG00000001174	MRPL15	9.91918	10.2809	-2.30442	protein_coding	Down
ENSBTAG00000001225	RBM14	8.30873	8.63637	-2.08565	protein_coding	Down
ENSBTAG00000001257	AGTPBP1	8.07101	8.30822	-1.50546	protein_coding	Down
ENSBTAG00000001302	MRPS28	7.92731	8.24489	-2.02105	protein_coding	Down
ENSBTAG00000001303	HSPB8	12.6456	12.9004	-1.61831	protein_coding	Down
ENSBTAG00000001308		4.65808	4.97907	-2.04297	protein_coding	Down
ENSBTAG00000001335	GHR	9.73741	9.4564	1.81908	protein_coding	Up
ENSBTAG00000001344	METTL21E	7.97141	8.51105	-3.44563	protein_coding	Down
ENSBTAG00000001353	PMPCA	10.7192	10.9576	-1.513	protein_coding	Down
ENSBTAG00000001398	ATP2A2	15.1193	14.8553	1.7099	protein_coding	Up
ENSBTAG00000001405	GLCE	6.81988	6.44671	2.41024	protein_coding	Up
ENSBTAG00000001410	GRAMD1B	5.73719	5.49802	1.55058	protein_coding	Up
ENSBTAG00000001465	P2RY1	7.71554	8.04075	-2.07002	protein_coding	Down
ENSBTAG00000001471	POC1A	5.97686	5.46949	3.27116	protein_coding	Up
ENSBTAG00000001485	PPIP5K2	7.29185	7.55882	-1.69638	protein_coding	Down
ENSBTAG00000001507	CLCN5	5.32083	5.5676	-1.5668	protein_coding	Down
ENSBTAG00000001512	ZFP64	8.29161	8.53397	-1.5385	protein_coding	Down
ENSBTAG00000001543	BRI3BP	5.29015	5.61726	-2.08219	protein_coding	Down
ENSBTAG00000001551	PLEKHG3	7.62781	7.26579	2.33874	protein_coding	Up
ENSBTAG00000001562	NFE2	4.92253	4.69014	1.50712	protein_coding	Up
ENSBTAG00000001575	CALM2	11.8166	12.0621	-1.55842	protein_coding	Down
ENSBTAG00000001601	PKM	15.9047	16.2098	-1.94085	protein_coding	Down
ENSBTAG00000001603	YIPF7	9.31098	9.67135	-2.29554	protein_coding	Down
ENSBTAG00000001609	MAP2K6	9.49752	9.2321	1.719	protein_coding	Up
ENSBTAG00000001626	CTPS1	6.87916	7.32602	-2.85043	protein_coding	Down
ENSBTAG00000001631	KIFC1	4.86955	5.12155	-1.60032	protein_coding	Down
ENSBTAG00000001634	PHF1	8.45616	8.21684	1.5516	protein_coding	Up
ENSBTAG00000001706	SLC9A2	6.91942	7.54019	-3.96608	protein_coding	Down
ENSBTAG00000001725	CXCL10	4.68946	4.93583	-1.56428	protein_coding	Down
ENSBTAG00000001748	TRIM45	7.34528	6.8011	3.50737	protein_coding	Up
ENSBTAG00000001770	ST8SIA5	6.8756	7.19432	-2.02842	protein_coding	Down
ENSBTAG00000001773	CYREN	7.42172	7.67368	-1.60012	protein_coding	Down
ENSBTAG00000001781	TOMM40	9.90077	10.1408	-1.52367	protein_coding	Down
ENSBTAG00000001785	TGM3	4.85411	4.60375	1.62243	protein_coding	Up
ENSBTAG00000001788	PDPN	5.78918	5.55738	1.50331	protein_coding	Up
ENSBTAG00000001801	SYT4	7.20708	6.71536	3.17078	protein_coding	Up
ENSBTAG00000001823	STC2	5.21004	4.92183	1.86523	protein_coding	Up
ENSBTAG00000001842	GSTM3	7.91738	7.31006	3.9124	protein_coding	Up
ENSBTAG00000001847	CNTLN	6.05424	5.75956	1.90672	protein_coding	Up
ENSBTAG00000001857	DOK4	6.2086	5.97034	1.54473	protein_coding	Up
ENSBTAG00000001858		7.0903	7.90829	-5.23133	protein_coding	Down
ENSBTAG00000001861	SESTD1	7.94096	7.63804	1.95959	protein_coding	Up
ENSBTAG00000001864	NR4A3	5.18071	4.68296	3.20946	protein_coding	Up
ENSBTAG00000001865	SGCG	10.0339	10.2836	-1.58539	protein_coding	Down
ENSBTAG00000001898	CCDC112	6.56283	6.22851	2.161	protein_coding	Up
ENSBTAG00000001922	AKIP1	6.76688	7.17934	-2.62974	protein_coding	Down
ENSBTAG00000001933	PTPA	10.7762	11.0766	-1.91092	protein_coding	Down
ENSBTAG00000001936	PCK1	5.23621	4.83984	2.55907	protein_coding	Up
ENSBTAG00000001938	CKS2	5.00016	5.53351	-3.40524	protein_coding	Down
ENSBTAG00000001945	ARG2	5.57228	5.33237	1.55533	protein_coding	Up
ENSBTAG00000001969	CCDC39	5.01566	5.37949	-2.31773	protein_coding	Down
ENSBTAG00000001983	SMAGP	5.24338	5.0076	1.52887	protein_coding	Up
ENSBTAG00000001992	CYP51A1	6.61765	6.88347	-1.68901	protein_coding	Down
ENSBTAG00000002006	THBS1	7.37777	6.88536	3.17519	protein_coding	Up
ENSBTAG00000002024	ASB18	7.27267	7.01676	1.65801	protein_coding	Up
ENSBTAG00000002030	SPP2	5.03277	4.80137	1.5008	protein_coding	Up
ENSBTAG00000002036	CACNB1	11.5595	11.7986	-1.51727	protein_coding	Down
ENSBTAG00000002069	BOLA	8.65173	10.5397	-12.0954	protein_coding	Down
ENSBTAG00000002078	KDM4A	8.81281	8.55102	1.69573	protein_coding	Up
ENSBTAG00000002127	TCP11L2	8.16846	7.87241	1.91549	protein_coding	Up
ENSBTAG00000002233	CPNE2	5.67868	5.32298	2.29818	protein_coding	Up
ENSBTAG00000002299	SEL1L3	10.0527	10.4609	-2.6027	protein_coding	Down
ENSBTAG00000002302	CD59	9.95494	10.2281	-1.73588	protein_coding	Down
ENSBTAG00000002323	USP28	11.3925	11.6619	-1.71183	protein_coding	Down
ENSBTAG00000002348	SLC4A4	6.23998	6.53727	-1.89091	protein_coding	Down
ENSBTAG00000002362	APOLD1	6.83869	7.09982	-1.65895	protein_coding	Down
ENSBTAG00000002444	MKI67	4.53356	4.81046	-1.76005	protein_coding	Down
ENSBTAG00000002473	ANGPTL4	7.31985	6.87428	2.87469	protein_coding	Up
ENSBTAG00000002478	AGMAT	5.11684	4.85695	1.68358	protein_coding	Up
ENSBTAG00000002485	TNS1	11.3745	11.0288	2.23444	protein_coding	Up
ENSBTAG00000002531	ARHGAP10	8.8642	8.62432	1.55515	protein_coding	Up
ENSBTAG00000002534	EEF1E1	8.28409	8.58285	-1.90029	protein_coding	Down
ENSBTAG00000002566	PGPEP1	8.8911	8.30997	3.74439	protein_coding	Up
ENSBTAG00000002580	MYH14	10.0926	9.85291	1.55419	protein_coding	Up
ENSBTAG00000002605		7.35852	7.6892	-2.10513	protein_coding	Down
ENSBTAG00000002630	MRTFA	8.60122	8.8382	-1.50402	protein_coding	Down
ENSBTAG00000002644	KCNQ4	8.33062	8.72103	-2.4883	protein_coding	Down
ENSBTAG00000002655	ZWINT	5.8423	6.5048	-4.23381	protein_coding	Down
ENSBTAG00000002676	SAE1	9.70127	9.96664	-1.68611	protein_coding	Down
ENSBTAG00000002680	TMEM132E	4.66808	4.92397	-1.62534	protein_coding	Down
ENSBTAG00000002699	KIT	6.36737	6.09114	1.78841	protein_coding	Up
ENSBTAG00000002714	GNAI1	6.04899	5.77408	1.77986	protein_coding	Up
ENSBTAG00000002747	ABCA5	8.19889	7.94659	1.63485	protein_coding	Up
ENSBTAG00000002786		4.71059	4.97416	-1.67454	protein_coding	Down
ENSBTAG00000002796	KLHL3	5.05722	5.35433	-1.88977	protein_coding	Down
ENSBTAG00000002816	SARM1	5.18692	4.85502	2.14554	protein_coding	Up
ENSBTAG00000002817	SLC46A1	5.53816	5.85543	-2.01905	protein_coding	Down
ENSBTAG00000002846	TRAF3IP3	5.41777	5.70167	-1.80498	protein_coding	Down
ENSBTAG00000002880	SORBS1	10.09	9.65011	2.83808	protein_coding	Up
ENSBTAG00000002898	UNC45B	12.1623	12.4077	-1.55821	protein_coding	Down
ENSBTAG00000002922	GAB2	7.81356	7.35587	2.95254	protein_coding	Up
ENSBTAG00000002924	DUPD1	9.86738	10.1323	-1.68347	protein_coding	Down
ENSBTAG00000002936	PRRX2	5.55905	5.27168	1.85985	protein_coding	Up
ENSBTAG00000002962	PPM1M	6.72021	6.39997	2.07067	protein_coding	Up
ENSBTAG00000002980	GPT2	9.84454	10.1022	-1.63666	protein_coding	Down
ENSBTAG00000002985	KCNMB1	5.96758	5.71738	1.62143	protein_coding	Up
ENSBTAG00000003014	TRPV2	5.52002	5.26361	1.66121	protein_coding	Up
ENSBTAG00000003015	SESN1	9.8538	9.57013	1.83611	protein_coding	Up
ENSBTAG00000003017	TTC38	6.82277	6.52505	1.9262	protein_coding	Up
ENSBTAG00000003018	FSTL3	6.14457	5.81125	2.15468	protein_coding	Up
ENSBTAG00000003020	SSC4D	7.49143	7.12003	2.39894	protein_coding	Up
ENSBTAG00000003068	MSMO1	7.9421	8.23121	-1.83842	protein_coding	Down
ENSBTAG00000003074	SLC16A6	10.6028	11.0464	-2.82955	protein_coding	Down
ENSBTAG00000003089	RHPN2	5.66079	5.36415	1.91929	protein_coding	Up
ENSBTAG00000003115	KBTBD2	9.4684	9.70907	-1.52762	protein_coding	Down
ENSBTAG00000003155	IFI27L2	6.50634	5.99491	3.29723	protein_coding	Up
ENSBTAG00000003166	AXL	7.43938	7.13822	1.94831	protein_coding	Up
ENSBTAG00000003169	FBXO24	5.47548	5.16639	1.99916	protein_coding	Up
ENSBTAG00000003177	SLC25A33	7.34776	6.67993	4.3006	protein_coding	Up
ENSBTAG00000003178	ATE1	7.87569	8.13602	-1.65375	protein_coding	Down
ENSBTAG00000003189	CCDC6	9.18721	9.49119	-1.93384	protein_coding	Down
ENSBTAG00000003222	ASNS	8.32529	9.23926	-5.847	protein_coding	Down
ENSBTAG00000003256	TOMM34	6.14275	6.47538	-2.11765	protein_coding	Down
ENSBTAG00000003275		7.20193	7.54594	-2.19057	protein_coding	Down
ENSBTAG00000003278	HOXC10	7.75038	7.99132	-1.52942	protein_coding	Down
ENSBTAG00000003322	TTLL7	7.39876	7.83845	-2.80445	protein_coding	Down
ENSBTAG00000003329	FST	6.50877	6.75876	-1.58745	protein_coding	Down
ENSBTAG00000003336	TPD52L1	5.65079	5.96654	-2.00932	protein_coding	Down
ENSBTAG00000003358	MCFD2	10.9727	10.6922	1.8159	protein_coding	Up
ENSBTAG00000003362	HSP90B1	10.8683	11.1061	-1.50923	protein_coding	Down
ENSBTAG00000003366	DDX58	6.51143	6.26655	1.58724	protein_coding	Up
ENSBTAG00000003396	MAFB	9.35792	9.69364	-2.13742	protein_coding	Down
ENSBTAG00000003483	NUDT18	6.46484	6.1733	1.88656	protein_coding	Up
ENSBTAG00000003503	C18H16orf87	6.25664	5.96236	1.90418	protein_coding	Up
ENSBTAG00000003578	DPCD	6.8439	7.11493	-1.72244	protein_coding	Down
ENSBTAG00000003604	ADAMTSL4	8.58912	7.99576	3.82284	protein_coding	Up
ENSBTAG00000003665	NUP210	7.20841	7.45984	-1.59672	protein_coding	Down
ENSBTAG00000003697	TARDBP	9.14506	9.3871	-1.53651	protein_coding	Down
ENSBTAG00000003727	SH3KBP1	7.35608	7.10118	1.65152	protein_coding	Up
ENSBTAG00000003763	MYO5C	6.09226	6.35039	-1.63965	protein_coding	Down
ENSBTAG00000003779	ZC4H2	6.15049	5.86181	1.86822	protein_coding	Up
ENSBTAG00000003822	CROCC	7.64713	7.40991	1.53812	protein_coding	Up
ENSBTAG00000003826	SCN1B	11.006	11.2648	-1.64395	protein_coding	Down
ENSBTAG00000003845	CSRNP1	6.88079	6.63905	1.5671	protein_coding	Up
ENSBTAG00000003919	KIAA0408	6.64955	7.01367	-2.31959	protein_coding	Down
ENSBTAG00000003935	TMBIM1	9.15329	8.78026	2.40939	protein_coding	Up
ENSBTAG00000003958	TMEM220	5.69719	5.46448	1.5092	protein_coding	Up
ENSBTAG00000003965	LIPT1	6.34759	6.00218	2.23213	protein_coding	Up
ENSBTAG00000003966	DUSP3	10.6137	10.8582	-1.55203	protein_coding	Down
ENSBTAG00000003989	GSTO1	9.08114	8.82317	1.67123	protein_coding	Up
ENSBTAG00000003990	ITPRIP	7.00353	6.73926	1.71166	protein_coding	Up
ENSBTAG00000004000	SAP30L	7.27462	7.01467	1.68393	protein_coding	Up
ENSBTAG00000004048	MCHR1	6.94474	6.65298	1.88798	protein_coding	Up
ENSBTAG00000004072	CAPZA2	12.2732	12.5253	-1.60097	protein_coding	Down
ENSBTAG00000004079	ZNF106	13.0997	13.5858	-3.10208	protein_coding	Down
ENSBTAG00000004112	GAMT	10.6732	11.179	-3.22818	protein_coding	Down
ENSBTAG00000004115	MYLIP	8.48414	8.23998	1.58268	protein_coding	Up
ENSBTAG00000004118	ALAS1	10.9844	11.3864	-2.56253	protein_coding	Down
ENSBTAG00000004126	MLF1	11.8134	12.1027	-1.83947	protein_coding	Down
ENSBTAG00000004159	SIX2	7.91004	8.21062	-1.91202	protein_coding	Down
ENSBTAG00000004196	FMNL1	6.29032	5.93931	2.26809	protein_coding	Up
ENSBTAG00000004226	SHBG	5.67185	5.41343	1.6741	protein_coding	Up
ENSBTAG00000004248	MLYCD	10.1694	9.79196	2.43794	protein_coding	Up
ENSBTAG00000004256	ODC1	9.53548	10.0855	-3.51219	protein_coding	Down
ENSBTAG00000004261	SPON2	6.84734	7.11795	-1.71974	protein_coding	Down
ENSBTAG00000004275	DKK3	5.99232	5.65008	2.21185	protein_coding	Up
ENSBTAG00000004290	DDX28	6.80544	6.54613	1.67981	protein_coding	Up
ENSBTAG00000004322	FOS	6.29208	7.25526	-6.16271	protein_coding	Down
ENSBTAG00000004344	ACSL1	12.1056	11.857	1.61114	protein_coding	Up
ENSBTAG00000004420	BAHD1	7.31163	7.06329	1.60946	protein_coding	Up
ENSBTAG00000004423	ARHGAP42	5.00299	5.29151	-1.83465	protein_coding	Down
ENSBTAG00000004432	CHRDL1	7.29429	7.02499	1.74391	protein_coding	Up
ENSBTAG00000004457	ORAI1	9.35038	9.66313	-1.99005	protein_coding	Down
ENSBTAG00000004488	MEI1	4.10114	4.48739	-2.46159	protein_coding	Down
ENSBTAG00000004494	B4GALNT1	4.95079	4.68194	1.74103	protein_coding	Up
ENSBTAG00000004499	RGS3	9.05588	9.33601	-1.78078	protein_coding	Down
ENSBTAG00000004554	CAPZB	10.9931	11.2448	-1.59858	protein_coding	Down
ENSBTAG00000004556	SLC2A3	6.71922	6.96564	-1.56459	protein_coding	Down
ENSBTAG00000004625	PYGB	7.26107	6.7745	3.13775	protein_coding	Up
ENSBTAG00000004663	TRUB2	6.42314	6.6647	-1.53341	protein_coding	Down
ENSBTAG00000004679	WARS1	10.2605	10.6222	-2.30404	protein_coding	Down
ENSBTAG00000004688	DHCR24	6.49272	6.99858	-3.22889	protein_coding	Down
ENSBTAG00000004742	RUNX1	4.50548	4.79138	-1.81784	protein_coding	Down
ENSBTAG00000004751	SPTBN4	5.35507	4.91485	2.84036	protein_coding	Up
ENSBTAG00000004776	DUSP23	7.78725	8.09541	-1.96064	protein_coding	Down
ENSBTAG00000004781	POLR3B	7.79913	8.17079	-2.36802	protein_coding	Down
ENSBTAG00000004787	METRNL	7.19709	6.95419	1.57454	protein_coding	Up
ENSBTAG00000004792	CHMP4C	6.92653	7.25155	-2.06878	protein_coding	Down
ENSBTAG00000004799	DENND2A	7.62381	7.8899	-1.69078	protein_coding	Down
ENSBTAG00000004815		6.46931	6.91641	-2.85194	protein_coding	Down
ENSBTAG00000004823	MRPL35	9.27468	9.51774	-1.54297	protein_coding	Down
ENSBTAG00000004824	REEP1	8.89802	9.36213	-2.96111	protein_coding	Down
ENSBTAG00000004832	KIF21A	7.57087	7.85925	-1.83377	protein_coding	Down
ENSBTAG00000004836	NRK	10.5889	10.8894	-1.91122	protein_coding	Down
ENSBTAG00000004842	RSPRY1	7.21755	6.97061	1.60042	protein_coding	Up
ENSBTAG00000004852	PLEKHO1	7.33976	7.0552	1.84181	protein_coding	Up
ENSBTAG00000004860	SLC27A6	6.96937	6.24895	4.638	protein_coding	Up
ENSBTAG00000004879	FOXO4	9.33245	9.03207	1.94332	protein_coding	Up
ENSBTAG00000004881	MTHFD2	6.48647	6.7487	-1.66601	protein_coding	Down
ENSBTAG00000004893	ACOX3	8.81308	8.48749	2.10504	protein_coding	Up
ENSBTAG00000004902	INTS8	9.8279	10.0778	-1.58684	protein_coding	Down
ENSBTAG00000004931	POLE2	5.68461	5.92175	-1.50502	protein_coding	Down
ENSBTAG00000004962	BCORL1	7.62151	7.99117	-2.35515	protein_coding	Down
ENSBTAG00000004989	IRF5	5.51113	5.27176	1.55192	protein_coding	Up
ENSBTAG00000004990	NEO1	8.8569	9.09608	-1.51809	protein_coding	Down
ENSBTAG00000004991	ELP1	8.35873	8.5966	-1.50972	protein_coding	Down
ENSBTAG00000005008	WSB1	8.21428	7.97302	1.56402	protein_coding	Up
ENSBTAG00000005012	HSPH1	8.96867	9.4881	-3.316	protein_coding	Down
ENSBTAG00000005048	DHRS7C	12.0771	12.4753	-2.53831	protein_coding	Down
ENSBTAG00000005078	UCHL1	5.94017	5.64081	1.93678	protein_coding	Up
ENSBTAG00000005085	TRIM63	11.0755	10.5674	3.27567	protein_coding	Up
ENSBTAG00000005089	RHBDD2	6.5144	6.17254	2.20936	protein_coding	Up
ENSBTAG00000005115	SLC31A2	7.78244	7.50271	1.81086	protein_coding	Up
ENSBTAG00000005144	PNPLA2	10.5728	10.0528	3.35242	protein_coding	Up
ENSBTAG00000005178	MMAB	7.4807	7.77556	-1.87529	protein_coding	Down
ENSBTAG00000005250	BGN	7.70203	7.42228	1.81099	protein_coding	Up
ENSBTAG00000005260	SPP1	5.10031	4.78372	2.04731	protein_coding	Up
ENSBTAG00000005301	KLHL32	4.71968	5.14341	-2.70207	protein_coding	Down
ENSBTAG00000005364	HMBS	9.98756	10.2664	-1.77225	protein_coding	Down
ENSBTAG00000005373	TPM1	16.8192	17.1952	-2.39571	protein_coding	Down
ENSBTAG00000005393	TIPRL	7.88968	8.14012	-1.59038	protein_coding	Down
ENSBTAG00000005412	NEDD4L	9.05358	8.69622	2.30883	protein_coding	Up
ENSBTAG00000005445	SLC35D1	5.91198	6.16269	-1.59213	protein_coding	Down
ENSBTAG00000005453	FGD4	5.38683	5.64751	-1.656	protein_coding	Down
ENSBTAG00000005464	ADCY6	9.72294	9.34319	2.45253	protein_coding	Up
ENSBTAG00000005498	SQLE	6.62218	7.04399	-2.68973	protein_coding	Down
ENSBTAG00000005524	HBP1	8.90371	8.66627	1.53952	protein_coding	Up
ENSBTAG00000005534	ENO3	16.3974	16.6898	-1.85965	protein_coding	Down
ENSBTAG00000005586	GATM	9.37704	9.90993	-3.40234	protein_coding	Down
ENSBTAG00000005604	POPDC2	8.59208	8.88498	-1.86276	protein_coding	Down
ENSBTAG00000005622	LITAF	7.13525	6.75855	2.4329	protein_coding	Up
ENSBTAG00000005663	HAUS2	7.53446	7.2274	1.98609	protein_coding	Up
ENSBTAG00000005670	ARHGEF19	5.22699	4.94897	1.79984	protein_coding	Up
ENSBTAG00000005672	CDH22	5.21604	4.94269	1.76988	protein_coding	Up
ENSBTAG00000005714	ACTC1	11.9178	12.826	-5.80973	protein_coding	Down
ENSBTAG00000005715	FUOM	8.17025	7.75674	2.66908	protein_coding	Up
ENSBTAG00000005716	CRABP2	4.96805	5.507	-3.44117	protein_coding	Down
ENSBTAG00000005718	PLIN2	7.55021	7.31064	1.55322	protein_coding	Up
ENSBTAG00000005729	FBXL4	8.27325	7.9718	1.95018	protein_coding	Up
ENSBTAG00000005738	ATP8B1	6.01178	5.72436	1.86014	protein_coding	Up
ENSBTAG00000005744	COQ2	8.47745	8.76503	-1.8286	protein_coding	Down
ENSBTAG00000005812	TP73	5.52873	5.29331	1.52655	protein_coding	Up
ENSBTAG00000005897	FNTB	9.12483	8.68896	2.8125	protein_coding	Up
ENSBTAG00000005913	PATL1	9.73934	9.46577	1.77131	protein_coding	Up
ENSBTAG00000005929	SPTBN2	6.00623	5.75647	1.61859	protein_coding	Up
ENSBTAG00000005970	XBP1	9.10506	9.38543	-1.78235	protein_coding	Down
ENSBTAG00000005972		4.68942	4.95836	-1.70902	processed_pseudogene	Down
ENSBTAG00000005985	CBLN2	4.5183	4.77233	-1.61337	protein_coding	Down
ENSBTAG00000006016	GTPBP2	8.71249	8.42879	1.83628	protein_coding	Up
ENSBTAG00000006026	BEX3	6.38883	6.68234	-1.86668	protein_coding	Down
ENSBTAG00000006030	MYOG	9.35654	9.69366	-2.1464	protein_coding	Down
ENSBTAG00000006035	PPP1R1B	6.41691	6.16105	1.6577	protein_coding	Up
ENSBTAG00000006052	PLCD3	8.75958	8.39145	2.3779	protein_coding	Up
ENSBTAG00000006080	MAST1	5.34315	5.08377	1.68025	protein_coding	Up
ENSBTAG00000006084	PINK1	12.583	12.9003	-2.01922	protein_coding	Down
ENSBTAG00000006103	XRCC6	7.82871	8.15484	-2.07595	protein_coding	Down
ENSBTAG00000006135	MAP1LC3A	10.1507	9.88223	1.73872	protein_coding	Up
ENSBTAG00000006222	TFDP2	7.53054	7.15384	2.43291	protein_coding	Up
ENSBTAG00000006232	WDR86	7.23008	6.93756	1.89286	protein_coding	Up
ENSBTAG00000006276	C1QTNF1	6.76619	7.08913	-2.05547	protein_coding	Down
ENSBTAG00000006305	AK1	13.6716	14.0031	-2.11036	protein_coding	Down
ENSBTAG00000006307	HSD17B11	6.36082	6.05251	1.99413	protein_coding	Up
ENSBTAG00000006320	DBT	8.69753	8.34458	2.28059	protein_coding	Up
ENSBTAG00000006345	ART1	8.52003	8.20852	2.01469	protein_coding	Up
ENSBTAG00000006349	EXTL1	10.9316	11.2614	-2.09916	protein_coding	Down
ENSBTAG00000006383		7.66893	8.03855	-2.35487	protein_coding	Down
ENSBTAG00000006396	GPI	13.5177	13.9828	-2.96747	protein_coding	Down
ENSBTAG00000006434	SYNPO2	11.8797	12.137	-1.63454	protein_coding	Down
ENSBTAG00000006466	CD53	4.83307	5.10957	-1.75753	protein_coding	Down
ENSBTAG00000006471	OSBPL11	8.81226	8.28748	3.38284	protein_coding	Up
ENSBTAG00000006474	EPCAM	5.06485	4.7468	2.05661	protein_coding	Up
ENSBTAG00000006484		4.67003	4.96776	-1.89374	protein_coding	Down
ENSBTAG00000006491	AGL	12.9853	13.3808	-2.52125	protein_coding	Down
ENSBTAG00000006504	TCHP	6.87266	6.57261	1.94118	protein_coding	Up
ENSBTAG00000006529	PDSS1	8.04997	8.34734	-1.89139	protein_coding	Down
ENSBTAG00000006534	GTPBP8	6.02388	6.33937	-2.00768	protein_coding	Down
ENSBTAG00000006567	VIPR1	7.09772	6.85092	1.5996	protein_coding	Up
ENSBTAG00000006570	SEC22C	6.25812	6.02524	1.51024	protein_coding	Up
ENSBTAG00000006608	GGT5	6.25017	5.73319	3.33284	protein_coding	Up
ENSBTAG00000006614	TMCC1	9.49172	9.80275	-1.97904	protein_coding	Down
ENSBTAG00000006618	HLF	10.212	10.5456	-2.12367	protein_coding	Down
ENSBTAG00000006676	FIBIN	6.67561	6.36552	2.0056	protein_coding	Up
ENSBTAG00000006731	SLC7A5	5.96244	5.56986	2.53479	protein_coding	Up
ENSBTAG00000006770	MTBP	5.63854	6.04648	-2.60074	protein_coding	Down
ENSBTAG00000006785	ARF2	8.54785	8.83941	-1.85418	protein_coding	Down
ENSBTAG00000006797	MARCHF3	5.98792	5.44623	3.49134	protein_coding	Up
ENSBTAG00000006818	TMEM185A	7.86616	7.62206	1.58221	protein_coding	Up
ENSBTAG00000006831	C8H9orf85	6.09318	6.38573	-1.86048	protein_coding	Down
ENSBTAG00000006861	C11H2orf73	4.50991	4.76006	-1.58843	protein_coding	Down
ENSBTAG00000006902	KCNJ5	6.23561	6.70838	-3.0167	protein_coding	Down
ENSBTAG00000006904	TNS2	9.87761	9.49412	2.47644	protein_coding	Up
ENSBTAG00000006920	ABCF3	9.62455	9.8905	-1.68981	protein_coding	Down
ENSBTAG00000006921	ABCA6	6.93212	6.59966	2.1491	protein_coding	Up
ENSBTAG00000006928	OAT	9.62992	9.98802	-2.28101	protein_coding	Down
ENSBTAG00000006951	LMO2	9.01051	8.63973	2.39492	protein_coding	Up
ENSBTAG00000006963	RPL12	12.2682	11.8994	2.38204	protein_coding	Up
ENSBTAG00000006969	TUBB	12.0667	12.3789	-1.98653	protein_coding	Down
ENSBTAG00000006973	PHF21B	5.49581	5.80395	-1.96051	protein_coding	Down
ENSBTAG00000006984	CD55	6.01064	5.61226	2.572	protein_coding	Up
ENSBTAG00000007002	IDUA	7.1637	6.90976	1.64534	protein_coding	Up
ENSBTAG00000007013	TOM1L1	6.04896	5.62953	2.70701	protein_coding	Up
ENSBTAG00000007066	TMTC4	7.2339	7.51474	-1.78533	protein_coding	Down
ENSBTAG00000007075		6.26251	6.64347	-2.42767	protein_coding	Down
ENSBTAG00000007090	MYH2	17.5993	17.8446	-1.55727	protein_coding	Down
ENSBTAG00000007116	ARRDC3	8.26018	9.02177	-4.86949	protein_coding	Down
ENSBTAG00000007129	IRAG1	8.59914	7.94018	4.24369	protein_coding	Up
ENSBTAG00000007131	GADL1	12.303	13.212	-5.81545	protein_coding	Down
ENSBTAG00000007148	F2	4.96943	4.60255	2.36996	protein_coding	Up
ENSBTAG00000007187		7.83326	7.58775	1.59128	protein_coding	Up
ENSBTAG00000007196	TAGLN	9.24284	8.9042	2.18875	protein_coding	Up
ENSBTAG00000007206	STRIP2	9.45597	9.16068	1.91067	protein_coding	Up
ENSBTAG00000007211	ASB12	10.6158	10.9145	-1.89985	protein_coding	Down
ENSBTAG00000007214	ELL2	7.6599	8.08623	-2.71868	protein_coding	Down
ENSBTAG00000007253	TSPAN33	5.10693	5.54667	-2.80481	protein_coding	Down
ENSBTAG00000007330	STXBP3	8.16806	7.93547	1.50842	protein_coding	Up
ENSBTAG00000007360	TMEM43	8.5349	8.29844	1.53327	protein_coding	Up
ENSBTAG00000007363	LSM3	7.64453	7.8892	-1.55333	protein_coding	Down
ENSBTAG00000007371	SCAMP1	6.61503	6.90625	-1.85197	protein_coding	Down
ENSBTAG00000007415	SLC7A8	8.95156	8.17653	4.98833	protein_coding	Up
ENSBTAG00000007507	FAAH	6.2245	5.9889	1.52772	protein_coding	Up
ENSBTAG00000007512	PLA2G15	6.60123	6.35132	1.61957	protein_coding	Up
ENSBTAG00000007515	UBE2Q1	9.40004	9.15485	1.58928	protein_coding	Up
ENSBTAG00000007547	CACNG1	11.7974	12.0407	-1.54506	protein_coding	Down
ENSBTAG00000007554	IFI6	6.28952	6.05464	1.52307	protein_coding	Up
ENSBTAG00000007589	SMAD9	5.47206	5.74717	-1.74866	protein_coding	Down
ENSBTAG00000007662	HSPA5	11.056	11.3228	-1.69539	protein_coding	Down
ENSBTAG00000007665	NPR3	6.5944	5.9473	4.16761	protein_coding	Up
ENSBTAG00000007689	LPIN1	8.97636	8.28259	4.46699	protein_coding	Up
ENSBTAG00000007694		5.69463	5.44148	1.6403	protein_coding	Up
ENSBTAG00000007763	SLC1A4	7.41862	7.67169	-1.6072	protein_coding	Down
ENSBTAG00000007778	TRPM3	5.70279	5.12868	3.69936	protein_coding	Up
ENSBTAG00000007784	NAA50	11.7337	11.971	-1.50599	protein_coding	Down
ENSBTAG00000007808	ANTXR1	6.88483	6.57928	1.97643	protein_coding	Up
ENSBTAG00000007835	GPT	10.4136	10.673	-1.64758	protein_coding	Down
ENSBTAG00000007836	PPA1	9.44813	9.7415	-1.86575	protein_coding	Down
ENSBTAG00000007840	HMGCR	7.90404	8.22118	-2.01825	protein_coding	Down
ENSBTAG00000007884	SREBF1	11.1889	10.7042	3.12554	protein_coding	Up
ENSBTAG00000007888	EFR3B	6.16157	5.79906	2.34191	protein_coding	Up
ENSBTAG00000007890	SEC14L5	7.7672	7.50504	1.69812	protein_coding	Up
ENSBTAG00000007943	AZIN1	11.0869	11.391	-1.93404	protein_coding	Down
ENSBTAG00000007981	GRK5	7.32139	7.06352	1.67058	protein_coding	Up
ENSBTAG00000008010	FLCN	7.9016	7.60451	1.92219	protein_coding	Up
ENSBTAG00000008013	LRRC2	8.86106	8.55604	1.97311	protein_coding	Up
ENSBTAG00000008026	OXT	7.51014	7.02601	3.1221	protein_coding	Up
ENSBTAG00000008028	CHN1	7.63076	8.27828	-4.13771	protein_coding	Down
ENSBTAG00000008100	GOLGA7B	5.85065	5.55855	1.89018	protein_coding	Up
ENSBTAG00000008138	HOXA2	5.06124	4.79869	1.70063	protein_coding	Up
ENSBTAG00000008147	MICAL1	5.63612	5.94981	-1.99609	protein_coding	Down
ENSBTAG00000008172	EGLN3	9.48463	9.79577	-1.97977	protein_coding	Down
ENSBTAG00000008175	ZNF713	5.11301	5.38019	-1.69775	protein_coding	Down
ENSBTAG00000008180	SPDL1	4.82137	5.10265	-1.78825	protein_coding	Down
ENSBTAG00000008184	CCT6A	11.0228	11.3105	-1.82922	protein_coding	Down
ENSBTAG00000008195	PHKG1	11.2417	11.5072	-1.68663	protein_coding	Down
ENSBTAG00000008204	CARNMT1	9.37974	9.82816	-2.86042	protein_coding	Down
ENSBTAG00000008216	RRM2	4.48799	4.89072	-2.56733	protein_coding	Down
ENSBTAG00000008240	GALNT15	5.4483	4.95702	3.16797	protein_coding	Up
ENSBTAG00000008300	FN1	8.16239	8.57598	-2.63697	protein_coding	Down
ENSBTAG00000008313	KLF15	7.4372	7.05649	2.45865	protein_coding	Up
ENSBTAG00000008349	ZNF311	6.13898	5.8163	2.08638	protein_coding	Up
ENSBTAG00000008353	CDKN1A	9.65445	9.02312	4.06643	protein_coding	Up
ENSBTAG00000008373	ITGA10	5.80235	5.46641	2.17143	protein_coding	Up
ENSBTAG00000008376	SMRP1	9.22714	9.4992	-1.72901	protein_coding	Down
ENSBTAG00000008385	KLHL36	6.63467	6.37627	1.67393	protein_coding	Up
ENSBTAG00000008394	MYL3	12.4813	12.9472	-2.97291	protein_coding	Down
ENSBTAG00000008397	ZNF555	6.00713	5.75788	1.61527	protein_coding	Up
ENSBTAG00000008406	TREX1	5.51857	5.79902	-1.78287	protein_coding	Down
ENSBTAG00000008497	RGS14	7.87519	8.19172	-2.01429	protein_coding	Down
ENSBTAG00000008518	MED25	8.6885	8.32088	2.3747	protein_coding	Up
ENSBTAG00000008528	SLC25A1	9.29976	8.9862	2.02784	protein_coding	Up
ENSBTAG00000008541	MGST1	7.69486	7.45257	1.57062	protein_coding	Up
ENSBTAG00000008545	ATF3	7.51768	7.2166	1.94782	protein_coding	Up
ENSBTAG00000008564		5.31731	4.69463	4.01095	protein_coding	Up
ENSBTAG00000008567	DLEC1	4.84113	4.58971	1.62922	protein_coding	Up
ENSBTAG00000008625	PLEKHF1	7.35151	6.96845	2.4737	protein_coding	Up
ENSBTAG00000008634	WBP2	9.58729	9.33834	1.61335	protein_coding	Up
ENSBTAG00000008636	PDE4B	7.98746	8.25274	-1.68552	protein_coding	Down
ENSBTAG00000008661	C15H11orf52	6.48832	6.03667	2.91371	protein_coding	Up
ENSBTAG00000008683	LDHA	15.8983	16.3568	-2.92496	protein_coding	Down
ENSBTAG00000008713	DCAF4	7.5709	7.27897	1.88907	protein_coding	Up
ENSBTAG00000008732	ZC3H12C	5.72305	5.98994	-1.69586	protein_coding	Down
ENSBTAG00000008739	SAMD11	8.00331	8.48138	-3.05062	protein_coding	Down
ENSBTAG00000008763	PRR32	8.37216	8.01714	2.29384	protein_coding	Up
ENSBTAG00000008807	FBXL22	7.86156	8.29614	-2.77166	protein_coding	Down
ENSBTAG00000008816	TRIM2	8.84608	9.27874	-2.75936	protein_coding	Down
ENSBTAG00000008841	DCAF15	7.225	6.9694	1.65602	protein_coding	Up
ENSBTAG00000008866	GANC	7.58237	7.8672	-1.81093	protein_coding	Down
ENSBTAG00000008868	CAPN3	12.7423	13.03	-1.82938	protein_coding	Down
ENSBTAG00000008895	BPGM	7.99064	8.30852	-2.02296	protein_coding	Down
ENSBTAG00000008921	NEXN	12.1406	12.4194	-1.77224	protein_coding	Down
ENSBTAG00000008931	CREG1	9.25649	8.99209	1.71245	protein_coding	Up
ENSBTAG00000008933	MFSD5	7.65633	7.41473	1.56621	protein_coding	Up
ENSBTAG00000008940	NPTX1	5.19468	4.37845	5.25259	protein_coding	Up
ENSBTAG00000008943	ZSCAN12	6.24183	6	1.56771	protein_coding	Up
ENSBTAG00000008951	ALPL	6.92677	6.47391	2.92147	protein_coding	Up
ENSBTAG00000009047	YPEL3	9.52533	9.19264	2.15059	protein_coding	Up
ENSBTAG00000009077	SNRPA	7.66895	7.90633	-1.50656	protein_coding	Down
ENSBTAG00000009080	ITGB6	9.34647	9.66003	-1.99524	protein_coding	Down
ENSBTAG00000009110		5.81507	5.55443	1.68833	pseudogene	Up
ENSBTAG00000009148	GPA33	5.85135	5.34342	3.27475	protein_coding	Up
ENSBTAG00000009153	MLXIPL	8.25358	7.72503	3.40705	protein_coding	Up
ENSBTAG00000009159	PLXNA1	8.10281	8.42494	-2.05021	protein_coding	Down
ENSBTAG00000009206	FOXS1	6.92585	6.4846	2.847	protein_coding	Up
ENSBTAG00000009215	NR1I3	5.58649	5.87437	-1.83051	protein_coding	Down
ENSBTAG00000009231	NSDHL	5.9956	6.25092	-1.62165	protein_coding	Down
ENSBTAG00000009292	TMEM100	5.90061	6.18249	-1.79207	protein_coding	Down
ENSBTAG00000009387	MYOM2	14.2567	14.7103	-2.89347	protein_coding	Down
ENSBTAG00000009407	MBTD1	6.58378	6.30779	1.78684	protein_coding	Up
ENSBTAG00000009430	MYRIP	5.29418	5.00252	1.88736	protein_coding	Up
ENSBTAG00000009432	PMF1	6.40455	6.01301	2.52811	protein_coding	Up
ENSBTAG00000009453	URGCP	6.88443	6.58722	1.92299	protein_coding	Up
ENSBTAG00000009493	BCL3	7.49594	7.22099	1.78014	protein_coding	Up
ENSBTAG00000009517	DBI	10.2744	10.5825	-1.96024	protein_coding	Down
ENSBTAG00000009554	EHBP1L1	11.5733	11.8895	-2.01215	protein_coding	Down
ENSBTAG00000009579	CEP85	9.61358	9.38171	1.50373	protein_coding	Up
ENSBTAG00000009617	SLC2A1	5.89851	5.66637	1.50553	protein_coding	Up
ENSBTAG00000009637	SLC12A2	7.49311	7.91754	-2.70652	protein_coding	Down
ENSBTAG00000009655	TNS3	6.91304	6.55127	2.33718	protein_coding	Up
ENSBTAG00000009656		5.22798	6.29047	-6.79983	protein_coding	Down
ENSBTAG00000009657	MTMR1	8.67652	8.9161	-1.52068	protein_coding	Down
ENSBTAG00000009707	MYL1	17.364	17.6419	-1.76656	protein_coding	Down
ENSBTAG00000009765	MTMR14	7.7864	7.53371	1.63736	protein_coding	Up
ENSBTAG00000009773	KREMEN1	8.87426	8.60991	1.71213	protein_coding	Up
ENSBTAG00000009846	MTHFD1L	7.9089	8.34199	-2.76208	protein_coding	Down
ENSBTAG00000009877	MCMBP	8.61038	8.29479	2.04084	protein_coding	Up
ENSBTAG00000009902	AKR1B1	9.47785	9.73752	-1.64956	protein_coding	Down
ENSBTAG00000009933	DTX3L	6.23713	6.00235	1.52247	protein_coding	Up
ENSBTAG00000009951	PGP	10.8143	11.115	-1.91273	protein_coding	Down
ENSBTAG00000009972	INHA	10.0414	10.752	-4.5427	protein_coding	Down
ENSBTAG00000010018	ATP7A	7.43157	7.77164	-2.16534	protein_coding	Down
ENSBTAG00000010026	CACNA1D	5.09013	4.75387	2.1735	protein_coding	Up
ENSBTAG00000010069	EGR1	6.56848	6.90317	-2.13087	protein_coding	Down
ENSBTAG00000010100	MED20	5.20657	5.60047	-2.51072	protein_coding	Down
ENSBTAG00000010144	MTERF2	7.91439	8.19621	-1.79162	protein_coding	Down
ENSBTAG00000010164	ESPNL	6.94138	6.69744	1.58119	protein_coding	Up
ENSBTAG00000010175	COL8A2	7.99265	8.39338	-2.55454	protein_coding	Down
ENSBTAG00000010191	PAK1	8.32512	8.7649	-2.805	protein_coding	Down
ENSBTAG00000010244	CLIC5	8.29052	8.53707	-1.56537	protein_coding	Down
ENSBTAG00000010284	ETNPPL	9.37674	9.89015	-3.27737	protein_coding	Down
ENSBTAG00000010334	SYTL3	5.16289	4.93018	1.50918	protein_coding	Up
ENSBTAG00000010339	ABHD11	8.04105	8.34206	-1.9148	protein_coding	Down
ENSBTAG00000010362	NOSTRIN	6.10431	5.738	2.36631	protein_coding	Up
ENSBTAG00000010371	CHAC1	7.97668	7.45262	3.37827	protein_coding	Up
ENSBTAG00000010389	STBD1	10.6171	10.947	-2.10051	protein_coding	Down
ENSBTAG00000010401	UBE4B	8.92264	8.60291	2.06744	protein_coding	Up
ENSBTAG00000010411	ADAMTS8	8.11502	7.86882	1.59571	protein_coding	Up
ENSBTAG00000010419	CYP2R1	7.21673	6.95119	1.71979	protein_coding	Up
ENSBTAG00000010422	MDM2	9.1364	9.44856	-1.98629	protein_coding	Down
ENSBTAG00000010426	XRCC5	7.30974	7.5656	-1.62514	protein_coding	Down
ENSBTAG00000010464	MN1	10.499	10.2067	1.89135	protein_coding	Up
ENSBTAG00000010477	TTC21A	4.65917	5.00393	-2.19542	protein_coding	Down
ENSBTAG00000010482	PITPNM1	6.13517	5.82866	1.98265	protein_coding	Up
ENSBTAG00000010549	IFRD1	8.41336	8.08592	2.11684	protein_coding	Up
ENSBTAG00000010555	LSMEM1	9.88277	10.2473	-2.32193	protein_coding	Down
ENSBTAG00000010571	PPAT	9.68309	9.9261	-1.54266	protein_coding	Down
ENSBTAG00000010606	PPP1R3B	9.69376	9.39296	1.94599	protein_coding	Up
ENSBTAG00000010637	ARSG	9.66751	9.36513	1.95614	protein_coding	Up
ENSBTAG00000010645	BOLA-DRA	8.45373	8.8693	-2.64975	protein_coding	Down
ENSBTAG00000010664	PRKCQ	8.94985	8.67873	1.75556	protein_coding	Up
ENSBTAG00000010666	KHNYN	7.39923	7.1033	1.9148	protein_coding	Up
ENSBTAG00000010667	PIK3IP1	6.30841	5.94993	2.31604	protein_coding	Up
ENSBTAG00000010793	CCDC80	7.84472	8.28636	-2.81693	protein_coding	Down
ENSBTAG00000010801	CMBL	9.42473	9.70092	-1.7555	protein_coding	Down
ENSBTAG00000010812	P2RX4	6.81729	6.52707	1.87806	protein_coding	Up
ENSBTAG00000010849	ANKRD23	14.5279	14.9412	-2.63542	protein_coding	Down
ENSBTAG00000010877	ARMC12	7.14167	6.26587	5.63478	protein_coding	Up
ENSBTAG00000010880	TNNI2	15.8852	16.1885	-1.92956	protein_coding	Down
ENSBTAG00000010882	ANKRD9	9.31605	9.67349	-2.2768	protein_coding	Down
ENSBTAG00000010923	RAB9A	7.66658	7.40994	1.66267	protein_coding	Up
ENSBTAG00000010939	CXHXorf58	5.86144	5.6033	1.67231	protein_coding	Up
ENSBTAG00000010952		5.18296	5.45332	-1.7182	protein_coding	Down
ENSBTAG00000010954	ART3	11.2807	10.9308	2.26096	protein_coding	Up
ENSBTAG00000010957	LHPP	9.17872	9.45453	-1.75311	protein_coding	Down
ENSBTAG00000010968	TMED1	8.36743	8.61064	-1.54398	protein_coding	Down
ENSBTAG00000010994	CTSF	8.61614	8.24982	2.36632	protein_coding	Up
ENSBTAG00000011045	MRPS36	10.684	10.9359	-1.59934	protein_coding	Down
ENSBTAG00000011101	EML6	7.06063	7.46813	-2.59794	protein_coding	Down
ENSBTAG00000011108	USP54	7.5491	7.24496	1.96742	protein_coding	Up
ENSBTAG00000011139	BCHE	5.73295	5.99965	-1.69466	protein_coding	Down
ENSBTAG00000011185	TTC23	7.81199	7.51485	1.92251	protein_coding	Up
ENSBTAG00000011187	FAM13A	8.52288	8.17885	2.22329	protein_coding	Up
ENSBTAG00000011234	FOXO3	7.24637	6.96421	1.8264	protein_coding	Up
ENSBTAG00000011241	HPDL	8.1741	8.54596	-2.36927	protein_coding	Down
ENSBTAG00000011266	ZBTB16	7.5119	7.2136	1.92995	protein_coding	Up
ENSBTAG00000011280	TBKBP1	6.82008	6.5566	1.70658	protein_coding	Up
ENSBTAG00000011332	TRIM68	8.71519	8.97133	-1.6269	protein_coding	Down
ENSBTAG00000011390	CHRND	7.50723	7.77488	-1.70074	protein_coding	Down
ENSBTAG00000011400	DBN1	12.4229	12.7458	-2.0552	protein_coding	Down
ENSBTAG00000011420	CA9	4.93791	4.65854	1.80855	protein_coding	Up
ENSBTAG00000011463	MID1IP1	10.096	9.80214	1.90121	protein_coding	Up
ENSBTAG00000011479	INPP5K	8.22901	7.91888	2.00587	protein_coding	Up
ENSBTAG00000011482	SLC43A2	9.34937	9.01142	2.18429	protein_coding	Up
ENSBTAG00000011500	CASQ2	11.1232	11.6511	-3.37066	protein_coding	Down
ENSBTAG00000011530	CDH15	8.43105	8.15421	1.79229	protein_coding	Up
ENSBTAG00000011548	AMPD1	11.4407	12.0784	-4.07465	protein_coding	Down
ENSBTAG00000011578	CD44	7.48316	7.76186	-1.77161	protein_coding	Down
ENSBTAG00000011586	HABP4	8.15649	8.45684	-1.91052	protein_coding	Down
ENSBTAG00000011622	C24H18orf21	7.49065	7.22456	1.72334	protein_coding	Up
ENSBTAG00000011628	EGFR	6.42227	6.08831	2.15874	protein_coding	Up
ENSBTAG00000011632	MAP1LC3B	10.4647	10.138	2.11212	protein_coding	Up
ENSBTAG00000011659	PIGZ	8.77593	9.04497	-1.70972	protein_coding	Down
ENSBTAG00000011667	PM20D2	7.28582	7.02814	1.66941	protein_coding	Up
ENSBTAG00000011677	H1-2	5.75493	5.40879	2.23687	protein_coding	Up
ENSBTAG00000011684	RAB11FIP1	5.12956	4.86969	1.68341	protein_coding	Up
ENSBTAG00000011700	PLLP	4.84824	5.28161	-2.76387	protein_coding	Down
ENSBTAG00000011709	IMPA1	8.37542	8.14337	1.50496	protein_coding	Up
ENSBTAG00000011731	PNMT	8.70448	8.43645	1.73578	protein_coding	Up
ENSBTAG00000011733	GIPC2	6.43059	6.6969	-1.69213	protein_coding	Down
ENSBTAG00000011734	ANKRD1	11.4807	11.2311	1.6169	protein_coding	Up
ENSBTAG00000011765	GABARAPL1	9.21486	8.68585	3.40999	protein_coding	Up
ENSBTAG00000011788	CXHXorf38	5.80401	6.04839	-1.55145	protein_coding	Down
ENSBTAG00000011803	MYH3	9.24512	10.0183	-4.94394	protein_coding	Down
ENSBTAG00000011808	MSTN	7.27726	7.77646	-3.18624	protein_coding	Down
ENSBTAG00000011819	PHF14	5.9758	6.25518	-1.77605	protein_coding	Down
ENSBTAG00000011820	DAPK2	7.82483	7.4907	2.1598	protein_coding	Up
ENSBTAG00000011832	ALDH18A1	8.54239	8.79009	-1.57277	protein_coding	Down
ENSBTAG00000011839	HMGCS1	9.08052	9.34406	-1.67441	protein_coding	Down
ENSBTAG00000011861	CFAP161	5.25109	5.01271	1.54551	protein_coding	Up
ENSBTAG00000011866	PCBD1	6.4995	6.92103	-2.68792	protein_coding	Down
ENSBTAG00000011908	CPQ	4.77198	5.04112	-1.71034	protein_coding	Down
ENSBTAG00000011909	ACVR1	7.31333	7.07051	1.57404	protein_coding	Up
ENSBTAG00000011934	PCK2	6.15074	6.52268	-2.36982	protein_coding	Down
ENSBTAG00000011975	SERPINB1	7.95918	7.69417	1.7164	protein_coding	Up
ENSBTAG00000011986	PLSCR4	6.61873	6.28642	2.14815	protein_coding	Up
ENSBTAG00000012007	SOCS2	7.50884	8.10963	-3.83794	protein_coding	Down
ENSBTAG00000012019	IRS2	6.5235	6.08303	2.84201	protein_coding	Up
ENSBTAG00000012034	KRT4	4.72298	4.97608	-1.60738	protein_coding	Down
ENSBTAG00000012035	EXOC3L1	5.12729	5.45725	-2.10051	protein_coding	Down
ENSBTAG00000012036	HR	8.6981	9.05941	-2.30161	protein_coding	Down
ENSBTAG00000012038	TRIM56	5.60794	5.31354	1.90492	pseudogene	Up
ENSBTAG00000012047	JAK2	7.76611	8.01079	-1.55341	protein_coding	Down
ENSBTAG00000012070	INTS2	6.81124	7.06066	-1.5838	protein_coding	Down
ENSBTAG00000012073	VOPP1	6.62578	6.36442	1.69297	protein_coding	Up
ENSBTAG00000012078	TMEM176A	5.65458	6.13628	-3.0739	protein_coding	Down
ENSBTAG00000012083	IRX3	5.85127	5.25727	3.82692	protein_coding	Up
ENSBTAG00000012107	SLC25A28	8.09193	7.83979	1.63384	protein_coding	Up
ENSBTAG00000012135	LARP1B	7.83143	8.12168	-1.84573	protein_coding	Down
ENSBTAG00000012137	NTN1	6.49577	6.80936	-1.99552	protein_coding	Down
ENSBTAG00000012163	ITGB1BP2	8.70387	8.94312	-1.51852	protein_coding	Down
ENSBTAG00000012237	AEBP1	7.34711	6.92989	2.69281	protein_coding	Up
ENSBTAG00000012259	PNPO	7.45486	7.74592	-1.85088	protein_coding	Down
ENSBTAG00000012289	AKR7A2	8.00461	8.38944	-2.45253	protein_coding	Down
ENSBTAG00000012297	RIPOR3	6.29567	6.02905	1.72668	protein_coding	Up
ENSBTAG00000012314	LDLR	6.87911	7.25275	-2.38068	protein_coding	Down
ENSBTAG00000012319	KCNE5	6.80795	7.36046	-3.52823	protein_coding	Down
ENSBTAG00000012330	B2M	10.0894	10.342	-1.60411	protein_coding	Down
ENSBTAG00000012338	FAH	6.8911	6.405	3.13473	protein_coding	Up
ENSBTAG00000012370	MGP	10.4568	10.1692	1.86162	protein_coding	Up
ENSBTAG00000012393	AGT	6.43854	6.10051	2.18479	protein_coding	Up
ENSBTAG00000012409	POSTN	6.12551	6.55336	-2.72847	protein_coding	Down
ENSBTAG00000012421	TANGO2	7.14071	6.89128	1.61644	protein_coding	Up
ENSBTAG00000012449	AFF3	4.8832	5.13418	-1.59381	protein_coding	Down
ENSBTAG00000012450	RAPGEF2	9.18322	8.86395	2.06446	protein_coding	Up
ENSBTAG00000012451	BOLA-DMB	6.87241	7.15665	-1.80718	protein_coding	Down
ENSBTAG00000012467	MASP1	9.45263	8.87354	3.7313	protein_coding	Up
ENSBTAG00000012485	SPOUT1	8.68607	8.95514	-1.70988	protein_coding	Down
ENSBTAG00000012508	OSGIN1	5.15315	4.81477	2.18708	protein_coding	Up
ENSBTAG00000012519	XDH	9.4012	9.05044	2.26651	protein_coding	Up
ENSBTAG00000012534	BEND3	5.12731	5.4091	-1.79148	protein_coding	Down
ENSBTAG00000012557	OSGEPL1	7.35945	7.6133	-1.61226	protein_coding	Down
ENSBTAG00000012592	ANKLE1	5.10931	4.80846	1.94633	protein_coding	Up
ENSBTAG00000012605	GPR157	7.34538	7.02521	2.07027	protein_coding	Up
ENSBTAG00000012632	TECR	10.6819	10.9848	-1.92673	protein_coding	Down
ENSBTAG00000012674	CNKSR3	7.0935	7.36443	-1.72182	protein_coding	Down
ENSBTAG00000012725	C10H14orf93	6.21045	5.87908	2.14214	protein_coding	Up
ENSBTAG00000012755	KLC4	7.6848	7.4246	1.68552	protein_coding	Up
ENSBTAG00000012777	SRF	11.4239	11.7737	-2.22754	protein_coding	Down
ENSBTAG00000012828	TBC1D15	8.25361	8.01991	1.51551	protein_coding	Up
ENSBTAG00000012837	COL6A6	5.49191	5.75478	-1.67014	protein_coding	Down
ENSBTAG00000012848	PTPRU	5.84078	5.52595	2.03599	protein_coding	Up
ENSBTAG00000012896	METTL7B	4.94304	4.63858	1.96945	protein_coding	Up
ENSBTAG00000012919	MMP15	8.06398	8.31005	-1.5623	protein_coding	Down
ENSBTAG00000012962	SARS1	10.4154	10.6564	-1.52937	protein_coding	Down
ENSBTAG00000012981	HEXA	7.33837	7.09171	1.59868	protein_coding	Up
ENSBTAG00000012987	ULK1	10.1637	9.74886	2.67784	protein_coding	Up
ENSBTAG00000012991	PRUNE2	5.53976	5.84289	-1.92835	protein_coding	Down
ENSBTAG00000012994	LOX	5.53992	5.19521	2.22772	protein_coding	Up
ENSBTAG00000013007	FAM210B	10.6693	10.1857	3.11873	protein_coding	Up
ENSBTAG00000013015	CCDC13	5.11015	4.82204	1.86457	protein_coding	Up
ENSBTAG00000013029	ARNTL	6.80724	6.44383	2.34766	protein_coding	Up
ENSBTAG00000013032	CCNDBP1	9.01776	8.75122	1.72619	protein_coding	Up
ENSBTAG00000013050	ZNF277	7.76286	7.46922	1.90003	protein_coding	Up
ENSBTAG00000013065	HFE	6.40741	6.09807	2.00082	protein_coding	Up
ENSBTAG00000013081	PSPH	7.68841	8.48947	-5.12274	protein_coding	Down
ENSBTAG00000013141	ACTRT3	5.295	5.03123	1.70842	protein_coding	Up
ENSBTAG00000013162	HSPA8	13.8944	14.255	-2.29697	protein_coding	Down
ENSBTAG00000013178	ALAS2	5.08397	5.34125	-1.63424	protein_coding	Down
ENSBTAG00000013278	MAGIX	7.3412	7.58658	-1.55787	protein_coding	Down
ENSBTAG00000013306	ZBTB7C	5.95346	6.32558	-2.37091	protein_coding	Down
ENSBTAG00000013317	RNF168	8.27614	8.00395	1.76247	protein_coding	Up
ENSBTAG00000013337	DHDH	8.862	9.15048	-1.83437	protein_coding	Down
ENSBTAG00000013343	FTL	9.61379	9.31036	1.96286	protein_coding	Up
ENSBTAG00000013347	DMPK	11.8973	12.4253	-3.37097	protein_coding	Down
ENSBTAG00000013401	ARHGEF40	8.31884	7.90284	2.68506	protein_coding	Up
ENSBTAG00000013411	ENO1	11.3756	11.6456	-1.7159	protein_coding	Down
ENSBTAG00000013475	TRAF3	6.73273	7.05593	-2.05716	protein_coding	Down
ENSBTAG00000013491	EML1	9.6075	9.85892	-1.59661	protein_coding	Down
ENSBTAG00000013492	PRKAG3	9.23691	9.64135	-2.57829	protein_coding	Down
ENSBTAG00000013513	ATP6V1C1	10.1141	9.84046	1.77158	protein_coding	Up
ENSBTAG00000013548	GABRE	5.15872	4.90216	1.66218	protein_coding	Up
ENSBTAG00000013573	BIRC5	4.9245	5.20927	-1.81057	protein_coding	Down
ENSBTAG00000013598	RSPO2	6.36287	6.92352	-3.58039	protein_coding	Down
ENSBTAG00000013607	WDR1	12.1732	12.4285	-1.62166	protein_coding	Down
ENSBTAG00000013624	LMNB2	9.01362	9.25801	-1.55157	protein_coding	Down
ENSBTAG00000013631	GLUL	12.5518	12.1845	2.37213	protein_coding	Up
ENSBTAG00000013645	RFFL	5.92508	5.58638	2.1891	protein_coding	Up
ENSBTAG00000013671	UTP14A	9.50897	9.20218	1.9844	protein_coding	Up
ENSBTAG00000013677	SEC14L1	9.72618	10.0197	-1.86696	protein_coding	Down
ENSBTAG00000013680	ATP1B2	5.69543	5.40983	1.84846	protein_coding	Up
ENSBTAG00000013699	TBC1D1	7.85729	7.62581	1.50131	protein_coding	Up
ENSBTAG00000013721	PSMD10	7.72839	7.99575	-1.6989	protein_coding	Down
ENSBTAG00000013723	MRPS25	9.42001	9.79446	-2.38589	protein_coding	Down
ENSBTAG00000013734	ATP6V1E2	5.1892	4.86632	2.08759	protein_coding	Up
ENSBTAG00000013736	PROM1	5.69759	5.94425	-1.56609	protein_coding	Down
ENSBTAG00000013744	SYNPO	13.69	13.391	1.9343	protein_coding	Up
ENSBTAG00000013749	RHOQ	10.4613	10.6978	-1.5008	protein_coding	Down
ENSBTAG00000013792	UBALD2	10.3777	10.1395	1.54419	protein_coding	Up
ENSBTAG00000013830	LEO1	8.55173	8.84114	-1.84036	protein_coding	Down
ENSBTAG00000013860	GADD45A	9.48264	9.10014	2.4701	protein_coding	Up
ENSBTAG00000013861	SLC8A1	5.23173	4.96281	1.74144	protein_coding	Up
ENSBTAG00000013863	DUSP1	10.4819	10.7516	-1.71429	protein_coding	Down
ENSBTAG00000013919		8.4214	8.77068	-2.22447	protein_coding	Down
ENSBTAG00000013921	CKM	17.5501	17.7872	-1.50476	protein_coding	Down
ENSBTAG00000013929	RRAD	10.5422	10.0854	2.94692	protein_coding	Up
ENSBTAG00000013960	PSAT1	7.90914	8.62431	-4.57168	protein_coding	Down
ENSBTAG00000013992	ACYP1	7.26928	7.00287	1.72536	protein_coding	Up
ENSBTAG00000014003	MYF6	10.1527	10.4028	-1.58817	protein_coding	Down
ENSBTAG00000014028	PSTK	5.42018	5.6989	-1.77179	protein_coding	Down
ENSBTAG00000014041	G3BP2	9.62349	9.88945	-1.68991	protein_coding	Down
ENSBTAG00000014069	PDK4	12.6396	12.3313	1.99413	protein_coding	Up
ENSBTAG00000014114	KLHL26	7.26603	6.97348	1.89303	protein_coding	Up
ENSBTAG00000014132	SNED1	6.7966	6.3356	2.97372	protein_coding	Up
ENSBTAG00000014221	CPLANE2	5.82677	6.202	-2.39093	protein_coding	Down
ENSBTAG00000014313	PYROXD2	6.72264	7.00015	-1.764	protein_coding	Down
ENSBTAG00000014370	NETO2	4.87048	5.30161	-2.74957	protein_coding	Down
ENSBTAG00000014375	TMCC3	5.31902	5.0272	1.88835	protein_coding	Up
ENSBTAG00000014387	PRKAB2	9.21223	9.52537	-1.99257	protein_coding	Down
ENSBTAG00000014459	MAP6D1	6.12566	5.8471	1.8033	protein_coding	Up
ENSBTAG00000014466	VTCN1	5.16666	4.91508	1.63019	protein_coding	Up
ENSBTAG00000014469	NBEAL1	6.07085	6.40719	-2.14146	protein_coding	Down
ENSBTAG00000014476	ADAL	6.74893	6.9864	-1.50719	protein_coding	Down
ENSBTAG00000014491	ATP6V1G2	5.5022	5.79971	-1.89232	protein_coding	Down
ENSBTAG00000014526	MOB3A	6.96033	6.72446	1.52948	protein_coding	Up
ENSBTAG00000014538	HPCAL4	8.8513	8.56196	1.87253	protein_coding	Up
ENSBTAG00000014547	PGAM2	14.3418	14.7957	-2.89576	protein_coding	Down
ENSBTAG00000014564	XXYLT1	7.15088	7.51358	-2.31054	protein_coding	Down
ENSBTAG00000014583	CALM3	13.248	13.6076	-2.29052	protein_coding	Down
ENSBTAG00000014585	PTGIR	5.02402	4.73926	1.84311	protein_coding	Up
ENSBTAG00000014614	ACTA2	9.51382	9.19814	2.04143	protein_coding	Up
ENSBTAG00000014619	WASF3	7.41017	7.17772	1.50754	protein_coding	Up
ENSBTAG00000014676	SHROOM1	5.2297	4.93359	1.9159	protein_coding	Up
ENSBTAG00000014695	NAA38	8.73883	8.98285	-1.54911	protein_coding	Down
ENSBTAG00000014705	HES4	5.94193	5.66131	1.81649	protein_coding	Up
ENSBTAG00000014721	MUC4	5.7114	6.14214	-2.74704	protein_coding	Down
ENSBTAG00000014749	ZIC4	5.74297	6.04264	-1.90619	protein_coding	Down
ENSBTAG00000014751	ZIC1	7.09354	7.34633	-1.60546	protein_coding	Down
ENSBTAG00000014765		3.96001	4.39041	-2.74486	protein_coding	Down
ENSBTAG00000014791	CTH	6.08005	5.79951	1.81603	protein_coding	Up
ENSBTAG00000014824	MMP14	7.62762	7.34525	1.8278	protein_coding	Up
ENSBTAG00000014832	TMEFF2	5.14766	5.39277	-1.55617	protein_coding	Down
ENSBTAG00000014862		7.74656	9.06672	-8.45292	protein_coding	Down
ENSBTAG00000014879	FAM185A	5.90131	6.20893	-1.95717	protein_coding	Down
ENSBTAG00000014881	PHF23	8.17123	7.89188	1.80834	protein_coding	Up
ENSBTAG00000014883	GABARAP	11.745	11.503	1.56892	protein_coding	Up
ENSBTAG00000014889	DCBLD2	6.80209	7.0627	-1.65554	protein_coding	Down
ENSBTAG00000014912	FMOD	6.72936	6.35159	2.43976	protein_coding	Up
ENSBTAG00000014918	IBA57	7.47173	7.72943	-1.63692	protein_coding	Down
ENSBTAG00000014972	PTGER4	6.59458	6.36078	1.51616	protein_coding	Up
ENSBTAG00000015016	CALCOCO1	9.96238	9.52739	2.80684	protein_coding	Up
ENSBTAG00000015018	FSD2	10.7547	11.0103	-1.62357	protein_coding	Down
ENSBTAG00000015032	CD14	5.20577	4.96105	1.58621	protein_coding	Up
ENSBTAG00000015037	GAREM2	6.92996	6.54279	2.50006	protein_coding	Up
ENSBTAG00000015058	CDH4	5.7676	5.51345	1.6467	protein_coding	Up
ENSBTAG00000015060	GBP5	4.65341	5.07088	-2.66193	protein_coding	Down
ENSBTAG00000015066	LANCL1	10.708	11.043	-2.13276	protein_coding	Down
ENSBTAG00000015089	LGALS1	10.6295	10.9238	-1.87131	protein_coding	Down
ENSBTAG00000015094	VNN1	7.38176	6.93202	2.90151	protein_coding	Up
ENSBTAG00000015099	RPL26L1	7.47842	7.24521	1.51238	protein_coding	Up
ENSBTAG00000015107	SLC16A1	8.95388	9.31192	-2.28065	protein_coding	Down
ENSBTAG00000015114	CALR	10.7683	11.0307	-1.6673	protein_coding	Down
ENSBTAG00000015117	GADD45GIP1	9.0035	9.2422	-1.51502	protein_coding	Down
ENSBTAG00000015127	SDC4	7.47567	7.02457	2.91017	protein_coding	Up
ENSBTAG00000015131	SLC29A1	11.0563	10.6732	2.474	protein_coding	Up
ENSBTAG00000015177	PRSS23	6.95822	6.67079	1.86024	protein_coding	Up
ENSBTAG00000015186	ILVBL	7.89908	8.21764	-2.02735	protein_coding	Down
ENSBTAG00000015191	ABCC6	5.50042	5.25224	1.60843	protein_coding	Up
ENSBTAG00000015200	L2HGDH	8.86255	9.1833	-2.04142	protein_coding	Down
ENSBTAG00000015214	CA3	13.6277	13.3408	1.85694	protein_coding	Up
ENSBTAG00000015221	PCCB	9.7712	10.0374	-1.69119	protein_coding	Down
ENSBTAG00000015228	CD74	10.4224	10.7257	-1.92924	protein_coding	Down
ENSBTAG00000015248	PLA2G16	8.51499	8.85709	-2.17837	protein_coding	Down
ENSBTAG00000015254	GLB1	7.17846	6.92535	1.64005	protein_coding	Up
ENSBTAG00000015303	MPP6	6.19303	5.86414	2.1262	protein_coding	Up
ENSBTAG00000015304	ANXA9	5.6275	5.31837	1.99943	protein_coding	Up
ENSBTAG00000015309	CFAP300	5.39875	5.14371	1.6524	protein_coding	Up
ENSBTAG00000015310	SLC25A36	8.56992	8.33685	1.51151	protein_coding	Up
ENSBTAG00000015314	ASL	6.92095	6.68704	1.51687	protein_coding	Up
ENSBTAG00000015341	DEPTOR	6.7663	7.05735	-1.85089	protein_coding	Down
ENSBTAG00000015350	PLIN1	6.26531	6.03261	1.50913	protein_coding	Up
ENSBTAG00000015355	PHKA2	5.27688	4.96274	2.03154	protein_coding	Up
ENSBTAG00000015375	SH2D3C	7.4731	7.23558	1.54002	protein_coding	Up
ENSBTAG00000015402	GREB1	6.4919	5.95319	3.4722	protein_coding	Up
ENSBTAG00000015441	ACTG2	6.03434	5.72408	2.00672	protein_coding	Up
ENSBTAG00000015470	SYPL2	13.2771	13.7223	-2.83949	protein_coding	Down
ENSBTAG00000015478	SRD5A1	6.81744	7.11787	-1.91103	protein_coding	Down
ENSBTAG00000015509	NAMPT	10.5665	10.1006	3.00475	protein_coding	Up
ENSBTAG00000015516	CCDC28A	6.23239	5.92214	2.0066	protein_coding	Up
ENSBTAG00000015537	RASAL2	5.42586	5.77158	-2.20161	protein_coding	Down
ENSBTAG00000015538	LEMD2	8.6928	8.31236	2.45687	protein_coding	Up
ENSBTAG00000015562	PLBD1	8.04749	7.58649	2.97369	protein_coding	Up
ENSBTAG00000015582	HMOX1	6.88354	6.3448	3.47246	protein_coding	Up
ENSBTAG00000015588	TMEM209	6.64642	6.31413	2.148	protein_coding	Up
ENSBTAG00000015655	APBB1	6.83768	6.35464	3.11508	protein_coding	Up
ENSBTAG00000015704	TMCO3	9.58045	9.32561	1.65114	protein_coding	Up
ENSBTAG00000015727	IFI47	5.45138	6.00016	-3.50425	protein_coding	Down
ENSBTAG00000015730	BOLA-DMA	7.08942	7.33228	-1.54173	protein_coding	Down
ENSBTAG00000015738	GIGYF1	9.34491	9.07546	1.74489	protein_coding	Up
ENSBTAG00000015751	MEOX1	5.95462	6.24852	-1.86919	protein_coding	Down
ENSBTAG00000015794	NES	10.4202	10.6891	-1.70922	protein_coding	Down
ENSBTAG00000015841	CCDC115	8.11779	8.36151	-1.54724	protein_coding	Down
ENSBTAG00000015848	PHKA1	12.6796	12.9534	-1.74047	protein_coding	Down
ENSBTAG00000015849	PNPLA4	6.29116	6.04568	1.59113	protein_coding	Up
ENSBTAG00000015885	PPFIA4	6.04382	6.34614	-1.92318	protein_coding	Down
ENSBTAG00000015889	CLCN7	8.46929	8.23376	1.52723	protein_coding	Up
ENSBTAG00000015905	ARHGAP32	5.35959	5.12525	1.51964	protein_coding	Up
ENSBTAG00000015950	ISOC2	9.34688	9.72747	-2.42525	protein_coding	Down
ENSBTAG00000015988	MYH11	9.07719	8.7818	1.91127	protein_coding	Up
ENSBTAG00000015996	GPC1	12.3802	12.6462	-1.6899	protein_coding	Down
ENSBTAG00000016000	CARF	5.80065	5.53358	1.7296	protein_coding	Up
ENSBTAG00000016057	CSRP1	9.07177	8.78015	1.88706	protein_coding	Up
ENSBTAG00000016063	DNER	6.22215	6.6106	-2.47569	protein_coding	Down
ENSBTAG00000016078	STXBP4	5.63255	5.94071	-1.96061	protein_coding	Down
ENSBTAG00000016091	KLHL25	7.19101	7.44733	-1.62809	protein_coding	Down
ENSBTAG00000016094	SLC36A1	5.12689	4.87501	1.6321	protein_coding	Up
ENSBTAG00000016103	CBFB	8.71773	8.48438	1.51333	protein_coding	Up
ENSBTAG00000016109	DHRS12	6.85461	6.58957	1.7166	protein_coding	Up
ENSBTAG00000016112	CCDC197	4.95218	4.59752	2.29153	protein_coding	Up
ENSBTAG00000016137	ZNF608	7.24138	7.63986	-2.54007	protein_coding	Down
ENSBTAG00000016139	TMEM120A	9.23676	8.94414	1.89349	protein_coding	Up
ENSBTAG00000016142	CYB5R2	6.03433	6.27194	-1.50808	protein_coding	Down
ENSBTAG00000016148		5.42744	4.89419	3.43722	lncRNA	Up
ENSBTAG00000016177	FGL1	7.45957	7.13575	2.09368	protein_coding	Up
ENSBTAG00000016185	ENAH	8.72503	8.98985	-1.6826	protein_coding	Down
ENSBTAG00000016194	FBXO32	7.67419	7.15683	3.33532	protein_coding	Up
ENSBTAG00000016206	MAOA	6.31384	5.77564	3.46899	protein_coding	Up
ENSBTAG00000016217	RBM43	6.59471	6.28357	2.01229	protein_coding	Up
ENSBTAG00000016220	WIPF3	7.20673	6.95975	1.60075	protein_coding	Up
ENSBTAG00000016230	BRWD3	6.06998	6.3519	-1.7923	protein_coding	Down
ENSBTAG00000016254	HDAC5	9.83019	9.49703	2.15362	protein_coding	Up
ENSBTAG00000016265	DNAJA1	9.73102	10.0986	-2.34207	protein_coding	Down
ENSBTAG00000016296	GPD1	13.2553	13.6794	-2.70387	protein_coding	Down
ENSBTAG00000016299	ZNF784	8.86356	8.57117	1.89206	protein_coding	Up
ENSBTAG00000016312	LGALS4	6.87106	6.46821	2.60067	protein_coding	Up
ENSBTAG00000016335	NPM3	6.98389	7.32894	-2.19731	protein_coding	Down
ENSBTAG00000016350	NACC1	9.94912	10.2577	-1.96349	protein_coding	Down
ENSBTAG00000016378	LRP10	8.90696	8.656	1.62627	protein_coding	Up
ENSBTAG00000016406	MCM10	6.21392	6.59033	-2.39845	protein_coding	Down
ENSBTAG00000016413	DUSP26	10.8702	10.5014	2.38195	protein_coding	Up
ENSBTAG00000016414	VDR	4.60371	5.02278	-2.67213	protein_coding	Down
ENSBTAG00000016444	RETREG1	8.7882	8.19734	3.80683	protein_coding	Up
ENSBTAG00000016450	CDNF	9.85844	10.2775	-2.67184	protein_coding	Down
ENSBTAG00000016473	NAT1	6.91316	7.19166	-1.77031	protein_coding	Down
ENSBTAG00000016486	SORBS2	6.43124	5.88221	3.53844	protein_coding	Up
ENSBTAG00000016494	RELT	6.63323	6.96666	-2.12274	protein_coding	Down
ENSBTAG00000016558	SPSB3	9.08093	8.8341	1.59978	protein_coding	Up
ENSBTAG00000016593	FMNL3	7.53132	7.29779	1.51446	protein_coding	Up
ENSBTAG00000016629	ADCY9	8.5075	8.25291	1.64953	protein_coding	Up
ENSBTAG00000016650	TIGAR	7.66639	7.91699	-1.59138	protein_coding	Down
ENSBTAG00000016683	NFKBIA	9.00085	8.5721	2.76681	protein_coding	Up
ENSBTAG00000016688		7.93829	8.41524	-3.04345	protein_coding	Down
ENSBTAG00000016735	ZBTB48	6.62662	6.36916	1.66797	protein_coding	Up
ENSBTAG00000016754	KLHL38	8.31141	7.88554	2.74832	protein_coding	Up
ENSBTAG00000016766	TMEM176B	5.57912	6.07211	-3.1464	protein_coding	Down
ENSBTAG00000016768	SCN3B	6.7278	5.93857	5.0794	protein_coding	Up
ENSBTAG00000016819	FABP3	11.3189	11.0474	1.75749	protein_coding	Up
ENSBTAG00000016896	HERPUD1	10.4104	10.1606	1.61937	protein_coding	Up
ENSBTAG00000016952	PSMD5	8.58726	8.28968	1.92532	protein_coding	Up
ENSBTAG00000017001	RBM28	7.5119	7.75293	-1.52995	protein_coding	Down
ENSBTAG00000017071	C1QTNF3	7.32418	7.63352	-1.96822	protein_coding	Down
ENSBTAG00000017116	RASD2	6.53737	6.22141	2.04319	protein_coding	Up
ENSBTAG00000017155	TRIM32	6.62437	6.91535	-1.85042	protein_coding	Down
ENSBTAG00000017263	MXI1	7.88042	7.63031	1.62078	protein_coding	Up
ENSBTAG00000017273	LRRC25	4.76825	4.53434	1.5169	protein_coding	Up
ENSBTAG00000017289	MCF2L	7.15703	6.79261	2.35414	protein_coding	Up
ENSBTAG00000017325	ATG13	8.44676	8.15912	1.86153	protein_coding	Up
ENSBTAG00000017326	OMA1	6.69286	6.95093	-1.63933	protein_coding	Down
ENSBTAG00000017328	PTI	5.79871	6.0549	-1.62729	protein_coding	Down
ENSBTAG00000017363	SAT1	8.00773	7.74202	1.7209	protein_coding	Up
ENSBTAG00000017373	LACTB	8.22889	8.57665	-2.2147	protein_coding	Down
ENSBTAG00000017455	ADAM9	8.18688	7.91197	1.77993	protein_coding	Up
ENSBTAG00000017471	KBTBD13	6.27076	5.805	3.00425	protein_coding	Up
ENSBTAG00000017492	PCMTD1	10.767	10.5154	1.63064	protein_coding	Up
ENSBTAG00000017509	MYPN	11.3491	11.6662	-2.01765	protein_coding	Down
ENSBTAG00000017512	MAPT	8.46351	8.70916	-1.55965	protein_coding	Down
ENSBTAG00000017524	CBLN4	8.34092	9.16112	-5.24553	protein_coding	Down
ENSBTAG00000017528	SNAI3	6.91123	6.52964	2.46428	protein_coding	Up
ENSBTAG00000017554	RTN4IP1	9.14082	9.42763	-1.8237	protein_coding	Down
ENSBTAG00000017571	PLEKHA5	6.37491	6.0583	2.04745	protein_coding	Up
ENSBTAG00000017592	GPAT3	8.24339	7.48769	4.86425	protein_coding	Up
ENSBTAG00000017670		6.26795	6.56889	-1.91435	protein_coding	Down
ENSBTAG00000017690	CARNS1	10.1726	10.7475	-3.67174	protein_coding	Down
ENSBTAG00000017733	CA2	9.93673	10.3111	-2.38511	protein_coding	Down
ENSBTAG00000017743	XIRP2	13.3125	13.8322	-3.31766	protein_coding	Down
ENSBTAG00000017764	HDAC4	7.46239	7.1765	1.85037	protein_coding	Up
ENSBTAG00000017804	BNIP3	10.1456	9.81495	2.13759	protein_coding	Up
ENSBTAG00000017812	ALS2CL	8.74002	8.41786	2.08301	protein_coding	Up
ENSBTAG00000017836	ZFP57	6.64388	6.35454	1.87249	protein_coding	Up
ENSBTAG00000017867	YPEL1	5.8001	5.46856	2.1432	protein_coding	Up
ENSBTAG00000017871	GNA12	7.30116	7.59067	-1.84098	protein_coding	Down
ENSBTAG00000017889	CCT5	10.3165	10.5538	-1.5057	protein_coding	Down
ENSBTAG00000017951	POLD4	8.33101	7.94862	2.46941	protein_coding	Up
ENSBTAG00000017956	KCTD15	9.12734	9.52624	-2.54276	protein_coding	Down
ENSBTAG00000017969	CA4	6.45923	6.14337	2.04261	protein_coding	Up
ENSBTAG00000017994	MAX	9.51224	9.23742	1.7793	protein_coding	Up
ENSBTAG00000018045	SLC12A4	7.8934	7.60947	1.83775	protein_coding	Up
ENSBTAG00000018049	MKNK2	11.2924	11.0582	1.51828	protein_coding	Up
ENSBTAG00000018062	KIAA1522	6.12093	6.35979	-1.51606	protein_coding	Down
ENSBTAG00000018164	FNDC4	5.70137	5.41993	1.82175	protein_coding	Up
ENSBTAG00000018167	KLHL31	11.1826	11.6117	-2.73641	protein_coding	Down
ENSBTAG00000018172	OGFOD3	6.92351	7.26388	-2.1673	protein_coding	Down
ENSBTAG00000018204	MYH1	16.8756	17.2015	-2.0744	protein_coding	Down
ENSBTAG00000018214	SHISA2	9.89033	10.3147	-2.70594	protein_coding	Down
ENSBTAG00000018227	SLC4A7	9.65391	9.12734	3.39441	protein_coding	Up
ENSBTAG00000018248	MGLL	10.9936	10.7485	1.58862	protein_coding	Up
ENSBTAG00000018310	SETD3	10.6728	10.9254	-1.60428	protein_coding	Down
ENSBTAG00000018352	ABRA	7.68511	8.041	-2.2668	protein_coding	Down
ENSBTAG00000018358	STAC3	12.5923	12.8437	-1.59681	protein_coding	Down
ENSBTAG00000018390	GLB1L2	7.44723	7.93523	-3.1144	protein_coding	Down
ENSBTAG00000018395	KIAA1217	9.13461	8.86575	1.74106	protein_coding	Up
ENSBTAG00000018421	WWP2	8.92664	8.66905	1.66879	protein_coding	Up
ENSBTAG00000018452	ANKRA2	7.43606	7.17355	1.70037	protein_coding	Up
ENSBTAG00000018474	IL6R	8.49347	7.99815	3.19385	protein_coding	Up
ENSBTAG00000018520	SCN1A	6.27407	6.03563	1.54597	protein_coding	Up
ENSBTAG00000018522	OAZ1	12.6521	12.419	1.51147	protein_coding	Up
ENSBTAG00000018579	DOK1	5.54421	5.30999	1.51891	protein_coding	Up
ENSBTAG00000018594	LIN37	6.96537	6.6235	2.20945	protein_coding	Up
ENSBTAG00000018688	CBR3	6.63561	6.39525	1.55827	protein_coding	Up
ENSBTAG00000018689	LIG3	8.61151	8.37405	1.53965	protein_coding	Up
ENSBTAG00000018691	RHOU	6.56341	6.26761	1.91393	protein_coding	Up
ENSBTAG00000018706	PCTP	6.96091	7.27451	-1.99552	protein_coding	Down
ENSBTAG00000018707	LDB3	15.1471	15.4486	-1.91798	protein_coding	Down
ENSBTAG00000018731		4.80364	5.11623	-1.9891	protein_coding	Down
ENSBTAG00000018747	PRKAA2	7.59135	7.87406	-1.79739	protein_coding	Down
ENSBTAG00000018804	CELSR2	7.67777	7.92062	-1.54168	protein_coding	Down
ENSBTAG00000018806	PSRC1	5.32953	5.61507	-1.81554	protein_coding	Down
ENSBTAG00000018841	PTPN3	6.983	6.47926	3.24791	protein_coding	Up
ENSBTAG00000018862	EIF4E3	7.86268	7.47289	2.51686	protein_coding	Up
ENSBTAG00000018936	LSS	7.28828	7.65418	-2.33103	protein_coding	Down
ENSBTAG00000018942	SSX2IP	6.41149	6.70922	-1.89369	protein_coding	Down
ENSBTAG00000018948	HIF3A	6.73782	6.3253	2.6627	protein_coding	Up
ENSBTAG00000018966	PLCE1	7.58312	7.86614	-1.79936	protein_coding	Down
ENSBTAG00000018972	GARS1	9.87854	10.1356	-1.63304	protein_coding	Down
ENSBTAG00000018978	KAT14	9.25868	8.9608	1.92726	protein_coding	Up
ENSBTAG00000018984	PIK3CD	5.22392	4.97485	1.61415	protein_coding	Up
ENSBTAG00000019010	EIF2B3	8.22932	8.49483	-1.68702	protein_coding	Down
ENSBTAG00000019014	MAGEF1	6.7218	6.37916	2.21444	protein_coding	Up
ENSBTAG00000019018		4.76378	5.24043	-3.04155	protein_coding	Down
ENSBTAG00000019044	BAIAP2	7.67095	7.2963	2.41972	protein_coding	Up
ENSBTAG00000019076	PAK6	5.39667	5.07316	2.0917	protein_coding	Up
ENSBTAG00000019081	COL7A1	5.92126	5.6688	1.63583	pseudogene	Up
ENSBTAG00000019106	EIF1B	8.42896	8.19161	1.53893	protein_coding	Up
ENSBTAG00000019130	FAM149B1	7.24453	6.98848	1.65893	protein_coding	Up
ENSBTAG00000019146	OSBP2	7.75072	7.13232	3.98351	protein_coding	Up
ENSBTAG00000019159	PVALB	4.54985	5.31353	-4.88289	protein_coding	Down
ENSBTAG00000019175	SOBP	7.44036	7.69591	-1.62313	protein_coding	Down
ENSBTAG00000019177	BIN1	13.8751	14.2413	-2.33309	protein_coding	Down
ENSBTAG00000019225	SLC39A14	7.40402	7.64042	-1.5003	protein_coding	Down
ENSBTAG00000019262	TOP2A	4.65019	5.12683	-3.04149	protein_coding	Down
ENSBTAG00000019291	GRB14	5.69139	6.04502	-2.25234	protein_coding	Down
ENSBTAG00000019310	FOXK1	6.34098	6.06489	1.78747	protein_coding	Up
ENSBTAG00000019347	PLXDC1	6.59788	7.0162	-2.66735	protein_coding	Down
ENSBTAG00000019349	SLC6A4	4.94277	4.70942	1.51323	protein_coding	Up
ENSBTAG00000019354	PAX8	4.58518	4.34832	1.53583	protein_coding	Up
ENSBTAG00000019386	BOLA-NC1	7.20143	7.62615	-2.70837	protein_coding	Down
ENSBTAG00000019445	C4H7orf31	5.06664	4.72896	2.18257	protein_coding	Up
ENSBTAG00000019454	ANGEL1	6.50523	6.2411	1.71074	protein_coding	Up
ENSBTAG00000019517	ELN	10.2528	9.72307	3.41485	protein_coding	Up
ENSBTAG00000019588	BLA-DQB	7.2468	7.92827	-4.35553	protein_coding	Down
ENSBTAG00000019623	GRID1	4.85509	5.18635	-2.10885	protein_coding	Down
ENSBTAG00000019625	EHHADH	7.96431	8.20732	-1.54274	protein_coding	Down
ENSBTAG00000019684	NUDT3	11.1874	11.5118	-2.06508	protein_coding	Down
ENSBTAG00000019694	ADAM23	4.98481	4.5279	2.94751	protein_coding	Up
ENSBTAG00000019700	PC	9.59301	9.91975	-2.07983	protein_coding	Down
ENSBTAG00000019777	CDCA3	5.83664	6.21135	-2.38756	protein_coding	Down
ENSBTAG00000019782	TPI1	15.0538	15.3132	-1.64778	protein_coding	Down
ENSBTAG00000019788	TEAD4	7.96402	8.2005	-1.50075	protein_coding	Down
ENSBTAG00000019812	MCRIP1	8.10715	7.8232	1.83785	protein_coding	Up
ENSBTAG00000019852	PDHA1	12.8678	13.1465	-1.77152	protein_coding	Down
ENSBTAG00000019864	MAPK15	6.39952	6.13108	1.73837	protein_coding	Up
ENSBTAG00000019900	LNPEP	8.02008	8.40773	-2.47057	protein_coding	Down
ENSBTAG00000019952	ARMC8	8.74397	8.98809	-1.54983	protein_coding	Down
ENSBTAG00000019960	TM4SF18	5.63064	6.04994	-2.67359	protein_coding	Down
ENSBTAG00000019979	CMPK2	6.18383	5.89757	1.85266	protein_coding	Up
ENSBTAG00000020014	CEP104	8.32808	8.59378	-1.68822	protein_coding	Down
ENSBTAG00000020035	RCAN1	9.7654	10.0085	-1.54305	protein_coding	Down
ENSBTAG00000020050	MLEC	8.09446	8.3788	-1.80784	protein_coding	Down
ENSBTAG00000020056	COL12A1	6.77246	6.3916	2.45959	protein_coding	Up
ENSBTAG00000020080	MYBPC2	15.0837	15.7021	-3.95101	protein_coding	Down
ENSBTAG00000020097	PERP	4.34435	4.66379	-2.03302	protein_coding	Down
ENSBTAG00000020099	STMN2	5.00638	4.75225	1.6466	protein_coding	Up
ENSBTAG00000020100		5.89298	6.42948	-3.4255	protein_coding	Down
ENSBTAG00000020133	PPP3CC	10.5742	10.2693	1.97206	protein_coding	Up
ENSBTAG00000020159	NKAIN1	4.85436	5.27394	-2.67545	protein_coding	Down
ENSBTAG00000020173	INPP5D	5.04085	5.44029	-2.54623	protein_coding	Down
ENSBTAG00000020185		5.01514	4.75019	1.71599	protein_coding	Up
ENSBTAG00000020205		7.98708	8.41337	-2.71843	protein_coding	Down
ENSBTAG00000020223	CASQ1	15.1221	15.5129	-2.4912	protein_coding	Down
ENSBTAG00000020262	PSME4	10.7452	10.3978	2.2451	protein_coding	Up
ENSBTAG00000020266	SLC19A2	6.69304	6.93976	-1.5665	protein_coding	Down
ENSBTAG00000020330	BTG1	9.44318	9.1035	2.19539	protein_coding	Up
ENSBTAG00000020334	ENTPD5	6.16092	6.47655	-2.00858	protein_coding	Down
ENSBTAG00000020344	SLC44A3	5.92407	6.265	-2.17084	protein_coding	Down
ENSBTAG00000020417	DAPK3	9.33218	8.99837	2.15772	protein_coding	Up
ENSBTAG00000020436	KIF27	5.96458	5.69795	1.7268	protein_coding	Up
ENSBTAG00000020446	THOP1	9.78352	9.39326	2.51989	protein_coding	Up
ENSBTAG00000020538	HERC5	5.76795	5.49223	1.78512	protein_coding	Up
ENSBTAG00000020569	CACNA2D1	12.9279	13.1994	-1.72563	protein_coding	Down
ENSBTAG00000020602	IDO1	5.51285	6.27974	-4.9035	protein_coding	Down
ENSBTAG00000020606	ZFAND2B	7.18891	6.93491	1.64577	protein_coding	Up
ENSBTAG00000020632	NQO1	8.47914	8.7868	-1.95746	protein_coding	Down
ENSBTAG00000020658	LNX1	5.95786	5.62319	2.16328	protein_coding	Up
ENSBTAG00000020661	ABCA1	7.07123	6.543	3.40499	protein_coding	Up
ENSBTAG00000020689	PPP1R13L	6.13666	5.859	1.79756	protein_coding	Up
ENSBTAG00000020698	MTHFR	8.74019	8.43753	1.95791	protein_coding	Up
ENSBTAG00000020701	MEF2C	11.203	11.5622	-2.28796	protein_coding	Down
ENSBTAG00000020736	CD40	5.25403	5.49699	-1.54235	protein_coding	Down
ENSBTAG00000020747	ASS1	7.29441	6.91091	2.47657	protein_coding	Up
ENSBTAG00000020829	PTPRK	6.63202	6.19218	2.83796	protein_coding	Up
ENSBTAG00000020853	SLC16A13	6.13445	5.82217	2.01961	protein_coding	Up
ENSBTAG00000020956	MPPED2	5.21681	4.94882	1.73553	protein_coding	Up
ENSBTAG00000020980	CAT	11.3406	11.0474	1.8971	protein_coding	Up
ENSBTAG00000020984	RAPGEF4	6.01369	5.70398	2.00313	protein_coding	Up
ENSBTAG00000021008	ZNF219	9.04648	8.72814	2.05851	protein_coding	Up
ENSBTAG00000021024	MACF1	10.4084	10.6735	-1.68483	protein_coding	Down
ENSBTAG00000021035	CTSK	8.43323	8.03726	2.55652	protein_coding	Up
ENSBTAG00000021045	E2F3	6.32078	6.66431	-2.18753	protein_coding	Down
ENSBTAG00000021048	ADM	7.4297	7.18228	1.60356	protein_coding	Up
ENSBTAG00000021073	KIAA1549	6.11139	5.85609	1.65405	protein_coding	Up
ENSBTAG00000021120	SMYD1	10.2363	10.6165	-2.42265	protein_coding	Down
ENSBTAG00000021141	CD8A	4.99189	5.37795	-2.46039	protein_coding	Down
ENSBTAG00000021218	MYLPF	16.7635	17.0914	-2.08713	protein_coding	Down
ENSBTAG00000021223	CRY2	8.64711	8.99238	-2.19874	protein_coding	Down
ENSBTAG00000021272	ABCG1	4.87061	4.60881	1.6958	protein_coding	Up
ENSBTAG00000021287	SLC16A7	7.07083	6.76946	1.94961	protein_coding	Up
ENSBTAG00000021298	METTL11B	7.39542	8.23386	-5.36255	protein_coding	Down
ENSBTAG00000021302	CHAD	7.6414	7.96495	-2.05934	protein_coding	Down
ENSBTAG00000021307	BNIP3L	7.58842	7.2399	2.25213	protein_coding	Up
ENSBTAG00000021435	MAFF	7.94593	7.63466	2.01314	protein_coding	Up
ENSBTAG00000021516	GSTA1	6.45862	7.23902	-4.99017	protein_coding	Down
ENSBTAG00000021521	BFAR	8.65396	8.39173	1.69858	protein_coding	Up
ENSBTAG00000021527	IGF1R	7.098	6.85659	1.56494	protein_coding	Up
ENSBTAG00000021531	PGPEP1L	5.36636	5.11452	1.63189	protein_coding	Up
ENSBTAG00000021565	PRSS2	5.14616	5.80064	-4.18231	protein_coding	Down
ENSBTAG00000021581	FHOD3	10.0278	10.8219	-5.07814	protein_coding	Down
ENSBTAG00000021582	NCAPG	6.16961	5.91727	1.63512	protein_coding	Up
ENSBTAG00000021687	JADE2	6.82062	6.50586	2.03559	protein_coding	Up
ENSBTAG00000021713	MAMLD1	5.91604	6.32505	-2.60757	protein_coding	Down
ENSBTAG00000021730	GJD2	4.46129	4.7008	-1.52026	protein_coding	Down
ENSBTAG00000021743	ZNF704	5.89051	5.63991	1.62396	protein_coding	Up
ENSBTAG00000021745	RAPSN	10.0686	9.78285	1.84925	protein_coding	Up
ENSBTAG00000021808	CACNB3	7.16145	7.39869	-1.50563	protein_coding	Down
ENSBTAG00000021811	ANGPT4	6.35292	6.02511	2.11927	protein_coding	Up
ENSBTAG00000021841	CHD7	7.94942	7.61322	2.17305	protein_coding	Up
ENSBTAG00000021859	PDSS2	6.70615	6.94778	-1.53384	protein_coding	Down
ENSBTAG00000021928	DIPK1B	5.54309	5.17984	2.34668	protein_coding	Up
ENSBTAG00000021941	DPP6	4.29979	4.6659	-2.33241	protein_coding	Down
ENSBTAG00000021957	LTBP2	5.76924	5.45235	2.04923	protein_coding	Up
ENSBTAG00000021978	PARVB	12.9688	13.2762	-1.95574	protein_coding	Down
ENSBTAG00000021999	CPT1A	7.9424	7.65494	1.86046	protein_coding	Up
ENSBTAG00000022036	ZNRF3	6.26623	5.99946	1.72769	protein_coding	Up
ENSBTAG00000022058	ACACB	11.7753	11.4923	1.83197	protein_coding	Up
ENSBTAG00000022158	TNNT3	17.0921	17.4068	-2.00235	protein_coding	Down
ENSBTAG00000022244	ACTN3	14.9427	15.4332	-3.13033	protein_coding	Down
ENSBTAG00000022255	AR	4.61492	4.95272	-2.15074	protein_coding	Down
ENSBTAG00000022292	TIMM8A	8.96365	9.31486	-2.23684	protein_coding	Down
ENSBTAG00000022294	FADS1	7.21909	7.49439	-1.74983	protein_coding	Down
ENSBTAG00000022461	SEPTIN10	8.57334	8.31365	1.68227	protein_coding	Up
ENSBTAG00000022489		6.95332	7.23362	-1.78188	protein_coding	Down
ENSBTAG00000022564	AKR1C4	7.77103	7.49082	1.81393	protein_coding	Up
ENSBTAG00000022575	TPRA1	8.96191	8.7055	1.66122	protein_coding	Up
ENSBTAG00000022622	CISH	8.75064	8.29531	2.93732	protein_coding	Up
ENSBTAG00000022699	CAV3	10.7579	11.0628	-1.93954	protein_coding	Down
ENSBTAG00000022714	HSPB3	8.53607	8.82025	-1.8068	protein_coding	Down
ENSBTAG00000022808	CACUL1	6.69587	6.96421	-1.70517	protein_coding	Down
ENSBTAG00000022989	FAM174B	6.89597	7.32322	-2.7246	protein_coding	Down
ENSBTAG00000023147	LINGO1	9.20076	9.45494	-1.61435	protein_coding	Down
ENSBTAG00000023177	CFH	7.57294	7.28178	1.88419	protein_coding	Up
ENSBTAG00000023429	PLS1	5.24199	5.56578	-2.06088	protein_coding	Down
ENSBTAG00000023600	APOD	7.83281	7.5474	1.8473	protein_coding	Up
ENSBTAG00000023632	FBXL8	6.2017	5.93605	1.72047	protein_coding	Up
ENSBTAG00000023648		6.25375	5.91911	2.16308	protein_coding	Up
ENSBTAG00000023845		6.321	6.60158	-1.78373	protein_coding	Down
ENSBTAG00000023929	FOSL2	8.43522	8.20017	1.52417	protein_coding	Up
ENSBTAG00000024000	ATOH8	7.56873	7.01393	3.57546	protein_coding	Up
ENSBTAG00000024272		5.33199	5.06937	1.70108	protein_coding	Up
ENSBTAG00000024492		6.89599	6.54454	2.27094	protein_coding	Up
ENSBTAG00000024493	DHRS3	8.06444	7.76286	1.95105	protein_coding	Up
ENSBTAG00000024509	TMEM52	9.34259	9.95468	-3.91041	protein_coding	Down
ENSBTAG00000024539	SPSB1	8.51661	8.12533	2.52641	protein_coding	Up
ENSBTAG00000024603	NCOR2	10.5372	10.2016	2.16892	protein_coding	Up
ENSBTAG00000024605	DYNLL1	8.31751	8.8659	-3.50177	protein_coding	Down
ENSBTAG00000024751	ULBP17	5.38973	5.07669	2.02456	protein_coding	Up
ENSBTAG00000024888	PDE5A	6.84998	7.13726	-1.82669	protein_coding	Down
ENSBTAG00000024929	PPP1R27	11.7901	11.3766	2.66921	protein_coding	Up
ENSBTAG00000024957	SNCA	4.51189	4.81237	-1.91137	protein_coding	Down
ENSBTAG00000025129	MNT	6.76531	6.38304	2.46868	protein_coding	Up
ENSBTAG00000025136	MYOZ3	10.9776	11.5602	-3.72133	protein_coding	Down
ENSBTAG00000025161	AGPAT2	8.96427	8.54354	2.71538	protein_coding	Up
ENSBTAG00000025258		5.87212	5.25164	3.99682	protein_coding	Up
ENSBTAG00000025385		7.61507	8.72954	-7.1333	protein_coding	Down
ENSBTAG00000025462	GADD45B	7.07473	6.68173	2.53747	protein_coding	Up
ENSBTAG00000025778	EMC9	9.48784	9.76755	-1.77814	protein_coding	Down
ENSBTAG00000025809	ABHD8	8.34827	8.66765	-2.03266	protein_coding	Down
ENSBTAG00000025848	RBM3	9.29432	9.05758	1.53499	protein_coding	Up
ENSBTAG00000025853	HOMER1	10.0311	10.3215	-1.84632	protein_coding	Down
ENSBTAG00000026461	CACNA1H	7.84565	7.50475	2.20327	protein_coding	Up
ENSBTAG00000026586	PPP1R14C	9.96218	10.2359	-1.73996	protein_coding	Down
ENSBTAG00000026637		7.23777	6.39702	5.40996	protein_coding	Up
ENSBTAG00000026796		6.72335	5.85315	5.59878	protein_coding	Up
ENSBTAG00000026919	PXDC1	6.21243	5.86703	2.23212	protein_coding	Up
ENSBTAG00000027081	ATP10A	5.75787	5.43669	2.07674	protein_coding	Up
ENSBTAG00000027197	KIF6	5.66377	5.40505	1.67604	protein_coding	Up
ENSBTAG00000027320	KCNB1	6.14559	6.39329	-1.57278	protein_coding	Down
ENSBTAG00000027375	DUSP22	7.48346	7.74368	-1.65306	protein_coding	Down
ENSBTAG00000027426		6.30155	6.04224	1.67985	protein_coding	Up
ENSBTAG00000027431	ZNF227	6.03982	5.71574	2.09537	protein_coding	Up
ENSBTAG00000027464	FGFRL1	10.5082	10.2283	1.81173	protein_coding	Up
ENSBTAG00000027477	B3GAT1	9.17482	9.55159	-2.40076	protein_coding	Down
ENSBTAG00000027629		13.3343	13.6623	-2.08804	protein_coding	Down
ENSBTAG00000027654	EIF4EBP1	10.2366	9.79208	2.86807	protein_coding	Up
ENSBTAG00000027867		5.38827	5.63031	-1.53645	protein_coding	Down
ENSBTAG00000027875	CCDC141	6.24317	6.54101	-1.89439	protein_coding	Down
ENSBTAG00000027962		7.57007	8.13837	-3.62947	protein_coding	Down
ENSBTAG00000029237	5S_rRNA	5.70814	5.36515	2.21661	rRNA	Up
ENSBTAG00000029846	bta-mir-27b	4.60457	4.87451	-1.71543	miRNA	Down
ENSBTAG00000029906	bta-mir-133a-2	9.58567	9.97479	-2.48003	miRNA	Down
ENSBTAG00000029926	MIR1-2	7.8264	8.29871	-3.01364	miRNA	Down
ENSBTAG00000030168	MIF4GD	10.7572	11.0336	-1.757	protein_coding	Down
ENSBTAG00000030170	JPT1	8.46947	8.90108	-2.75259	protein_coding	Down
ENSBTAG00000030174	ACOX1	8.74319	8.49241	1.6251	protein_coding	Up
ENSBTAG00000030208	ERFE	5.54423	5.18078	2.34792	protein_coding	Up
ENSBTAG00000030393	RDH13	7.16594	7.4751	-1.96703	protein_coding	Down
ENSBTAG00000030424	CLEC1A	7.04342	6.75367	1.87509	protein_coding	Up
ENSBTAG00000030432	TTC8	6.3906	6.12781	1.70211	protein_coding	Up
ENSBTAG00000030575	BHLHE41	7.79352	7.52767	1.72178	protein_coding	Up
ENSBTAG00000030599	SMOC1	6.75949	6.24433	3.32118	protein_coding	Up
ENSBTAG00000030650	TST	8.38133	8.07513	1.98058	protein_coding	Up
ENSBTAG00000030670	PCNT	9.64932	9.37625	1.76809	protein_coding	Up
ENSBTAG00000030674	AK4	7.35405	6.63069	4.65679	protein_coding	Up
ENSBTAG00000030705	DACT3	5.02016	5.29073	-1.71945	protein_coding	Down
ENSBTAG00000030775	PCBP3	5.29812	4.98928	1.99763	protein_coding	Up
ENSBTAG00000030897	XRCC2	4.94942	4.70585	1.57885	protein_coding	Up
ENSBTAG00000030898	MS4A13	4.42245	4.66819	-1.56023	protein_coding	Down
ENSBTAG00000030973	TUBA1D	5.68332	5.95765	-1.74365	protein_coding	Down
ENSBTAG00000031106	ZNF746	7.64949	7.4002	1.61551	protein_coding	Up
ENSBTAG00000031185	ATRAID	7.82217	7.58507	1.53736	protein_coding	Up
ENSBTAG00000031205		5.11697	4.85008	1.72845	protein_coding	Up
ENSBTAG00000031209	SLC22A4	5.60021	5.28882	2.01397	protein_coding	Up
ENSBTAG00000031214		6.1092	5.79433	2.03621	protein_coding	Up
ENSBTAG00000031217	MYL6B	13.513	13.209	1.96643	protein_coding	Up
ENSBTAG00000031287	TMEM158	4.64063	4.95558	-2.00419	protein_coding	Down
ENSBTAG00000031295	HSDL2	10.1046	9.84892	1.65676	protein_coding	Up
ENSBTAG00000031439	CDC14A	7.71707	8.01031	-1.86495	protein_coding	Down
ENSBTAG00000031573	NMRK2	13.9287	14.3997	-3.00587	protein_coding	Down
ENSBTAG00000031614	BOLL	5.63693	5.99195	-2.26127	protein_coding	Down
ENSBTAG00000031715	PCMTD2	9.51426	9.04512	3.02593	protein_coding	Up
ENSBTAG00000031750	PLAC8B	5.06861	5.35358	-1.8119	protein_coding	Down
ENSBTAG00000031778	H2BC5	6.75638	6.99994	-1.54619	protein_coding	Down
ENSBTAG00000031797	MANF	8.61328	8.85558	-1.53813	protein_coding	Down
ENSBTAG00000031875	BANF1	11.6989	11.9525	-1.61091	protein_coding	Down
ENSBTAG00000031919	SLC35E3	7.0594	7.34367	-1.80738	protein_coding	Down
ENSBTAG00000031967	AMPH	5.00566	4.7666	1.54989	protein_coding	Up
ENSBTAG00000032018	ZNF19	5.6011	5.25329	2.24756	protein_coding	Up
ENSBTAG00000032057		5.41913	5.88206	-2.95353	protein_coding	Down
ENSBTAG00000032121	SUGCT	5.50138	5.80748	-1.94741	protein_coding	Down
ENSBTAG00000032163	LTV1	8.29732	8.58356	-1.82005	protein_coding	Down
ENSBTAG00000032436	UBC	8.78969	8.22154	3.66108	protein_coding	Up
ENSBTAG00000032515	PLA2R1	5.55593	6.03356	-3.04783	protein_coding	Down
ENSBTAG00000032517	BCL7A	6.66567	6.39271	1.76738	protein_coding	Up
ENSBTAG00000032531	MUSTN1	11.3556	11.6255	-1.71508	protein_coding	Down
ENSBTAG00000032719	TFRC	11.7791	12.1818	-2.56717	protein_coding	Down
ENSBTAG00000032774	ADIRF	8.00263	8.25054	-1.57413	protein_coding	Down
ENSBTAG00000033089	HACD1	11.4126	11.795	-2.43739	protein_coding	Down
ENSBTAG00000033315	DNAJC1	7.23286	6.89408	2.18961	protein_coding	Up
ENSBTAG00000033365	METTL24	4.99017	4.57658	2.66958	protein_coding	Up
ENSBTAG00000033367	DDO	8.90316	8.53934	2.35028	protein_coding	Up
ENSBTAG00000033457	CCAR1	9.58769	9.846	-1.64085	protein_coding	Down
ENSBTAG00000033504	MAK16	8.186	8.46941	-1.80185	protein_coding	Down
ENSBTAG00000033690	BARD1	4.68063	4.95588	-1.74951	protein_coding	Down
ENSBTAG00000033835	MPZ	8.55095	9.07155	-3.32348	protein_coding	Down
ENSBTAG00000033902	SLC25A32	7.4301	7.70085	-1.72068	protein_coding	Down
ENSBTAG00000034077	ASIP	8.236	8.63867	-2.56698	protein_coding	Down
ENSBTAG00000034091	LRRC72	7.24355	7.55457	-1.97899	protein_coding	Down
ENSBTAG00000034222	CAB39L	5.86651	5.59849	1.73569	protein_coding	Up
ENSBTAG00000034368	PRSS33	5.0516	4.80095	1.62431	protein_coding	Up
ENSBTAG00000034776	DDAH1	7.65064	7.37343	1.79466	protein_coding	Up
ENSBTAG00000035018	ZCCHC12	5.95117	6.21426	-1.6715	protein_coding	Down
ENSBTAG00000035081	SERINC2	10.1669	9.90372	1.70485	protein_coding	Up
ENSBTAG00000035827	ATG7	7.0765	6.7918	1.84272	protein_coding	Up
ENSBTAG00000035844	PLAAT1	8.83775	9.3204	-3.08005	protein_coding	Down
ENSBTAG00000036087	ARMC2	5.46877	5.06591	2.60072	protein_coding	Up
ENSBTAG00000037526	FABP4	5.9633	5.53777	2.74619	protein_coding	Up
ENSBTAG00000037649	VIPR2	6.76975	6.45195	2.05499	protein_coding	Up
ENSBTAG00000037673	GSTM1	6.59892	6.09578	3.24405	protein_coding	Up
ENSBTAG00000037726	PLCD1	7.01904	6.77503	1.58166	protein_coding	Up
ENSBTAG00000037756	TET1	6.94131	7.26024	-2.02973	protein_coding	Down
ENSBTAG00000037775		4.53929	4.93542	-2.52497	protein_coding	Down
ENSBTAG00000037832	ASPHD2	5.06537	5.30477	-1.51955	protein_coding	Down
ENSBTAG00000037937		6.07153	5.833	1.54649	protein_coding	Up
ENSBTAG00000037938		6.48522	6.23619	1.61385	protein_coding	Up
ENSBTAG00000037980	TSEN2	6.53986	6.22114	2.06091	protein_coding	Up
ENSBTAG00000038048	MRC1	8.29284	8.72655	-2.76607	protein_coding	Down
ENSBTAG00000038128	BOLA-DQA5	4.84978	5.75192	-5.77115	protein_coding	Down
ENSBTAG00000038132	AIFM3	4.9002	5.18459	-1.80811	protein_coding	Down
ENSBTAG00000038186	GLRX	8.45816	8.75484	-1.88701	protein_coding	Down
ENSBTAG00000038233		5.81558	6.11592	-1.91042	protein_coding	Down
ENSBTAG00000038286	PPDPFL	8.93356	8.03108	5.80593	protein_coding	Up
ENSBTAG00000038306	CBX2	5.93804	5.67238	1.72058	protein_coding	Up
ENSBTAG00000038321	LIPE	7.92195	7.21339	4.56189	protein_coding	Up
ENSBTAG00000038335		5.44638	5.16574	1.81667	protein_coding	Up
ENSBTAG00000038377	ADAM20	5.11291	5.48918	-2.39759	protein_coding	Down
ENSBTAG00000038428	RELB	6.15406	6.40464	-1.59121	protein_coding	Down
ENSBTAG00000038464	PLIN5	8.51535	7.9465	3.66557	protein_coding	Up
ENSBTAG00000038540		7.5788	7.27771	1.94789	protein_coding	Up
ENSBTAG00000038849		10.2192	10.471	-1.5986	protein_coding	Down
ENSBTAG00000038938	GBP2	4.61843	4.93454	-2.01165	protein_coding	Down
ENSBTAG00000039190	SLC9A5	8.40974	8.85534	-2.8424	protein_coding	Down
ENSBTAG00000039196		4.61549	4.94695	-2.11008	protein_coding	Down
ENSBTAG00000039329	RAET1G	5.72657	5.26422	2.98239	protein_coding	Up
ENSBTAG00000039335	ARRDC2	7.73995	7.24652	3.18175	protein_coding	Up
ENSBTAG00000039440		4.21169	4.82321	-3.90675	protein_coding	Down
ENSBTAG00000039573	RABL6	10.3795	10.6428	-1.67259	protein_coding	Down
ENSBTAG00000039620	SAPCD1	5.26086	4.94394	2.04939	protein_coding	Up
ENSBTAG00000039671		5.17231	5.41488	-1.53986	protein_coding	Down
ENSBTAG00000039686	ACOT11	6.46108	6.20998	1.62716	protein_coding	Up
ENSBTAG00000039719	PHGDH	7.17631	8.02084	-5.4016	protein_coding	Down
ENSBTAG00000039861	OAS1Y	6.85757	6.49721	2.32804	protein_coding	Up
ENSBTAG00000040053	MYH6	11.0462	11.4939	-2.85545	protein_coding	Down
ENSBTAG00000040082	HOXA10	5.98346	6.26701	-1.80273	protein_coding	Down
ENSBTAG00000040116	H1-10	10.5308	10.0977	2.79438	protein_coding	Up
ENSBTAG00000040334	MEX3D	8.98248	8.73634	1.59531	protein_coding	Up
ENSBTAG00000040338	OBSL1	12.0751	12.3247	-1.58496	protein_coding	Down
ENSBTAG00000040398	CRACD	8.68504	9.0699	-2.45268	protein_coding	Down
ENSBTAG00000040406		4.8173	4.58404	1.51269	protein_coding	Up
ENSBTAG00000040584	DSC2	4.60236	5.23222	-4.0244	protein_coding	Down
ENSBTAG00000042631	SNORD86	4.93594	4.58203	2.2867	snoRNA	Up
ENSBTAG00000042837		4.99843	4.67487	2.09203	snoRNA	Up
ENSBTAG00000043093		5.70196	6.03471	-2.11843	snoRNA	Down
ENSBTAG00000043547		6.56324	6.26979	1.89886	Mt_tRNA	Up
ENSBTAG00000043553	GPX3	7.36122	7.03203	2.12809	protein_coding	Up
ENSBTAG00000043565		8.155	8.52586	-2.36283	Mt_tRNA	Down
ENSBTAG00000043583		5.94959	6.23287	-1.80103	Mt_tRNA	Down
ENSBTAG00000043948	HCN1	5.56439	5.29282	1.75843	protein_coding	Up
ENSBTAG00000043961	MPDZ	9.67936	9.93015	-1.59261	protein_coding	Down
ENSBTAG00000043987	KDM4C	7.45629	7.70957	-1.60859	protein_coding	Down
ENSBTAG00000044003	TEX10	7.1619	6.88701	1.77979	protein_coding	Up
ENSBTAG00000044071	HRH2	6.86526	7.2607	-2.52056	protein_coding	Down
ENSBTAG00000044105	FOXO1	7.70703	7.43679	1.74994	protein_coding	Up
ENSBTAG00000044106	SPIDR	6.27583	5.91287	2.34472	protein_coding	Up
ENSBTAG00000044125	TLCD4	5.29426	5.68457	-2.48767	protein_coding	Down
ENSBTAG00000044150	UCK2	7.3385	7.80824	-2.99725	protein_coding	Down
ENSBTAG00000044173	EHBP1	8.24829	8.53699	-1.83578	protein_coding	Down
ENSBTAG00000044195	SDK2	5.65712	5.31985	2.17997	protein_coding	Up
ENSBTAG00000044204	CD79B	4.83814	5.14978	-1.98293	protein_coding	Down
ENSBTAG00000044659	SCARNA13	5.12525	4.74992	2.42415	scaRNA	Up
ENSBTAG00000045010	bta-mir-2350	5.41337	5.71216	-1.90052	miRNA	Down
ENSBTAG00000045565	NHSL2	5.75261	6.01361	-1.65807	protein_coding	Down
ENSBTAG00000045574		4.70455	4.98326	-1.77169	protein_coding	Down
ENSBTAG00000045588		5.6926	5.32861	2.35136	protein_coding	Up
ENSBTAG00000045604	TTC9	9.44279	8.88895	3.56928	protein_coding	Up
ENSBTAG00000045628	C10H15orf61	6.91217	7.15329	-1.53056	protein_coding	Down
ENSBTAG00000045767	LAT2	5.39917	4.91944	3.09384	protein_coding	Up
ENSBTAG00000045877	TSC22D3	11.5957	11.3501	1.59194	protein_coding	Up
ENSBTAG00000045880		4.55609	5.0257	-2.99638	protein_coding	Down
ENSBTAG00000045925	CITED1	6.27854	6.04702	1.50154	protein_coding	Up
ENSBTAG00000046017	POPDC3	8.87595	8.55874	2.05125	protein_coding	Up
ENSBTAG00000046044		4.71302	4.958	-1.55532	protein_coding	Down
ENSBTAG00000046047		5.50343	4.99582	3.27272	protein_coding	Up
ENSBTAG00000046073	TMEM240	5.16995	4.90955	1.68686	protein_coding	Up
ENSBTAG00000046110	CLCF1	6.56494	6.26011	1.97181	protein_coding	Up
ENSBTAG00000046158	CFB	6.14727	5.61406	3.43698	protein_coding	Up
ENSBTAG00000046180		5.04809	4.71726	2.13866	protein_coding	Up
ENSBTAG00000046218	KLF11	8.11888	7.57698	3.4927	protein_coding	Up
ENSBTAG00000046307	CEBPD	8.96479	8.38125	3.75981	protein_coding	Up
ENSBTAG00000046324		4.92276	5.38306	-2.93667	protein_coding	Down
ENSBTAG00000046332	ACTA1	18.7657	19.2519	-3.10261	protein_coding	Down
ENSBTAG00000046333	C6H4orf54	10.6072	10.9536	-2.20635	protein_coding	Down
ENSBTAG00000046391	GRAMD2A	6.5206	6.80713	-1.82189	protein_coding	Down
ENSBTAG00000046467	PTP4A3	11.8672	11.5311	2.17248	protein_coding	Up
ENSBTAG00000046512	XIRP1	10.5086	10.2598	1.61232	protein_coding	Up
ENSBTAG00000046520	TCFL5	6.9565	6.70272	1.6443	protein_coding	Up
ENSBTAG00000046548	ST6GALNAC4	9.78334	10.2854	-3.20471	protein_coding	Down
ENSBTAG00000046552	GGACT	6.19002	6.47573	-1.8166	protein_coding	Down
ENSBTAG00000046587	CST6	10.5533	11.5938	-6.6592	protein_coding	Down
ENSBTAG00000046677	RTN4R	4.87426	4.5606	2.02851	protein_coding	Up
ENSBTAG00000046803	GAS1	7.27101	6.8606	2.64914	protein_coding	Up
ENSBTAG00000046838		8.50317	8.85308	-2.22853	protein_coding	Down
ENSBTAG00000046900	GGT1	5.38448	5.06912	2.03943	protein_coding	Up
ENSBTAG00000046924	SEMA3G	7.40575	7.13259	1.7687	protein_coding	Up
ENSBTAG00000046941		4.84458	5.10096	-1.62845	protein_coding	Down
ENSBTAG00000046980	KLRF2	4.72804	4.05977	4.30338	protein_coding	Up
ENSBTAG00000046988	FAM43B	6.68954	6.45005	1.55268	protein_coding	Up
ENSBTAG00000047004	UMAD1	5.69879	5.45354	1.5896	protein_coding	Up
ENSBTAG00000047029		8.42228	7.5563	5.57177	protein_coding	Up
ENSBTAG00000047213		5.97056	5.70731	1.70511	protein_coding	Up
ENSBTAG00000047223	GNAS	8.84719	9.31881	-3.00927	protein_coding	Down
ENSBTAG00000047293	NRIP1	7.61918	8.02117	-2.56256	protein_coding	Down
ENSBTAG00000047339	BCOR	8.40057	8.11445	1.8518	protein_coding	Up
ENSBTAG00000047441		7.53424	7.90184	-2.34193	protein_coding	Down
ENSBTAG00000047502	FKBP5	10.9493	10.4321	3.33399	protein_coding	Up
ENSBTAG00000047715	TPRN	7.86772	7.52216	2.23314	protein_coding	Up
ENSBTAG00000047752	OTUD1	7.53317	7.97074	-2.7908	protein_coding	Down
ENSBTAG00000047786	LRRC10B	5.92519	6.30239	-2.40359	protein_coding	Down
ENSBTAG00000047827	RENBP	5.28586	5.0208	1.71675	protein_coding	Up
ENSBTAG00000047834	EFR3A	10.263	10.6153	-2.24396	protein_coding	Down
ENSBTAG00000047902	ULBP21	7.22376	7.78106	-3.55892	protein_coding	Down
ENSBTAG00000048011	GPR160	4.99223	4.70946	1.83031	protein_coding	Up
ENSBTAG00000048059	TMEM86A	5.82024	5.43502	2.48752	protein_coding	Up
ENSBTAG00000048228		7.97931	7.4334	3.51839	protein_coding	Up
ENSBTAG00000048389		4.92078	4.65623	1.71339	protein_coding	Up
ENSBTAG00000048486	IQANK1	6.44035	6.05473	2.49009	protein_coding	Up
ENSBTAG00000048504		9.49696	9.7479	-1.5936	protein_coding	Down
ENSBTAG00000048515		9.80966	10.1488	-2.15939	lncRNA	Down
ENSBTAG00000048560	TMEM233	7.61531	7.95342	-2.15274	protein_coding	Down
ENSBTAG00000048585	SLN	12.9254	13.5078	-3.72023	protein_coding	Down
ENSBTAG00000048655	NT5E	5.19907	4.92686	1.76253	protein_coding	Up
ENSBTAG00000048707		5.02714	5.30823	-1.78693	protein_coding	Down
ENSBTAG00000048776		4.89478	5.19242	-1.89311	lncRNA	Down
ENSBTAG00000048781		11.6231	11.2462	2.43382	lncRNA	Up
ENSBTAG00000048782		10.4623	10.7078	-1.55864	protein_coding	Down
ENSBTAG00000048952		8.89093	9.18133	-1.8467	lncRNA	Down
ENSBTAG00000048966	FBXO46	5.79495	5.48441	2.00848	protein_coding	Up
ENSBTAG00000049275		4.86033	5.12132	-1.65807	protein_coding	Down
ENSBTAG00000049294		6.95512	6.71062	1.58477	protein_coding	Up
ENSBTAG00000049300	AARSD1	9.29795	9.59931	-1.91701	protein_coding	Down
ENSBTAG00000049306	MSRB1	13.0104	13.3044	-1.87029	protein_coding	Down
ENSBTAG00000049378		7.21989	7.57212	-2.24337	lncRNA	Down
ENSBTAG00000049411		5.10388	5.36331	-1.64802	protein_coding	Down
ENSBTAG00000049478		5.44969	5.20569	1.58164	protein_coding	Up
ENSBTAG00000049599	FAM163A	4.82423	5.15704	-2.1188	protein_coding	Down
ENSBTAG00000049613		5.71475	5.45612	1.67549	protein_coding	Up
ENSBTAG00000049730	TCEAL1	6.33693	6.06996	1.729	protein_coding	Up
ENSBTAG00000049852		5.60935	5.19377	2.68228	lncRNA	Up
ENSBTAG00000050008		9.66465	9.90809	-1.54547	protein_coding	Down
ENSBTAG00000050035	ZNF226	6.90824	6.67458	1.51526	protein_coding	Up
ENSBTAG00000050113		5.1768	4.93879	1.54313	lncRNA	Up
ENSBTAG00000050158		9.09654	9.60476	-3.24403	pseudogene	Down
ENSBTAG00000050177		5.28694	4.76118	3.38913	lncRNA	Up
ENSBTAG00000050186		5.9567	5.62507	2.14377	protein_coding	Up
ENSBTAG00000050214		4.50386	5.0115	-3.24039	processed_pseudogene	Down
ENSBTAG00000050387		6.16582	5.90611	1.68238	lncRNA	Up
ENSBTAG00000050435		6.19522	5.77446	2.71553	protein_coding	Up
ENSBTAG00000050527		6.56657	6.1496	2.69128	lncRNA	Up
ENSBTAG00000050535	ZNF385D	9.21102	9.48799	-1.76057	protein_coding	Down
ENSBTAG00000050675	BOLA3	9.65943	9.9379	-1.77018	protein_coding	Down
ENSBTAG00000050737		5.24125	4.33412	5.83576	protein_coding	Up
ENSBTAG00000050742		4.66712	4.91203	-1.55488	lncRNA	Down
ENSBTAG00000050785		5.33908	5.63286	-1.86838	protein_coding	Down
ENSBTAG00000050859		5.74944	5.47745	1.76116	protein_coding	Up
ENSBTAG00000050891		6.67937	6.26292	2.68791	lncRNA	Up
ENSBTAG00000050906		5.50929	5.77583	-1.69363	protein_coding	Down
ENSBTAG00000050907	RPP21	8.06879	8.33033	-1.66155	protein_coding	Down
ENSBTAG00000051043		4.48868	4.76505	-1.7567	protein_coding	Down
ENSBTAG00000051047		4.13448	4.50541	-2.3633	protein_coding	Down
ENSBTAG00000051076		5.45822	5.74171	-1.80239	protein_coding	Down
ENSBTAG00000051111		5.00398	5.60668	-3.85019	lncRNA	Down
ENSBTAG00000051206	KY	9.41217	10.1961	-5.01289	protein_coding	Down
ENSBTAG00000051225		6.91473	6.66978	1.58771	lncRNA	Up
ENSBTAG00000051230	SLC43A1	8.79187	8.4283	2.34869	protein_coding	Up
ENSBTAG00000051276		4.99095	4.69472	1.91672	lncRNA	Up
ENSBTAG00000051277		4.68313	4.31692	2.36555	lncRNA	Up
ENSBTAG00000051333	ARID5B	8.34088	7.98538	2.29693	protein_coding	Up
ENSBTAG00000051340		5.03912	5.28689	-1.57318	protein_coding	Down
ENSBTAG00000051376		5.61057	5.87771	-1.69745	protein_coding	Down
ENSBTAG00000051412	HBA	7.75297	8.05719	-1.93534	protein_coding	Down
ENSBTAG00000051440		5.00979	4.68548	2.0968	lncRNA	Up
ENSBTAG00000051519		7.08426	7.51403	-2.74076	protein_coding	Down
ENSBTAG00000051537		5.90682	5.65129	1.65563	protein_coding	Up
ENSBTAG00000051540	FNDC5	7.62457	7.31046	2.03138	protein_coding	Up
ENSBTAG00000051573		6.65057	6.3437	1.98491	protein_coding	Up
ENSBTAG00000051600		6.17295	5.75743	2.68191	protein_coding	Up
ENSBTAG00000051621	SLX4IP	6.90624	7.14813	-1.53552	protein_coding	Down
ENSBTAG00000051765		5.05093	4.74619	1.97127	lncRNA	Up
ENSBTAG00000051767		9.18596	9.46732	-1.78868	protein_coding	Down
ENSBTAG00000051785	bta-mir-29b-2	4.93612	4.6435	1.89352	miRNA	Up
ENSBTAG00000051828		8.7227	8.20042	3.36686	pseudogene	Up
ENSBTAG00000051834		9.7429	10.0061	-1.672	protein_coding	Down
ENSBTAG00000051880		5.40686	5.64504	-1.51174	protein_coding	Down
ENSBTAG00000051917	ZNF579	8.3885	8.10034	1.86487	protein_coding	Up
ENSBTAG00000051933		6.44175	6.05788	2.47895	lncRNA	Up
ENSBTAG00000051972	CEBPB	10.107	9.833	1.77428	protein_coding	Up
ENSBTAG00000052059		5.44734	5.09755	2.26026	lncRNA	Up
ENSBTAG00000052213	ADIPOQ	4.89663	4.65383	1.57396	protein_coding	Up
ENSBTAG00000052337	RPS29	11.8534	11.6012	1.6343	protein_coding	Up
ENSBTAG00000052404		9.7331	10.0385	-1.943	protein_coding	Down
ENSBTAG00000052443		9.17943	9.49909	-2.03443	protein_coding	Down
ENSBTAG00000052518	TUBB4B	11.66	11.9467	-1.82292	protein_coding	Down
ENSBTAG00000052600		8.18294	8.68187	-3.18453	protein_coding	Down
ENSBTAG00000052606	TRIM5	6.27081	6.53849	-1.70092	protein_coding	Down
ENSBTAG00000052707		5.26583	5.53273	-1.69594	protein_coding	Down
ENSBTAG00000052869		4.95684	5.23056	-1.7397	protein_coding	Down
ENSBTAG00000052878		5.7292	6.07306	-2.18969	protein_coding	Down
ENSBTAG00000052988	bta-mir-12036	4.97981	5.24811	-1.70492	miRNA	Down
ENSBTAG00000053310	C1QTNF9	8.14663	7.76834	2.44308	protein_coding	Up
ENSBTAG00000053346	SPSB2	12.6779	13.0007	-2.05417	protein_coding	Down
ENSBTAG00000053361	KLHL30	8.58615	8.13009	2.94199	protein_coding	Up
ENSBTAG00000053386	RAB43	6.6074	6.30982	1.92532	protein_coding	Up
ENSBTAG00000053399		4.97447	4.72928	1.58926	lncRNA	Up
ENSBTAG00000053482	SAMD13	5.22474	4.94348	1.82061	protein_coding	Up
ENSBTAG00000053551		5.5024	5.10685	2.55382	protein_coding	Up
ENSBTAG00000053632		5.47258	5.90088	-2.73134	protein_coding	Down
ENSBTAG00000053653		4.55271	4.31353	1.5507	protein_coding	Up
ENSBTAG00000053807	OAS1X	6.2934	5.93154	2.33771	protein_coding	Up
ENSBTAG00000053836	CCDC71L	6.2763	6.0173	1.6778	protein_coding	Up
ENSBTAG00000053911		5.53397	5.28757	1.59699	protein_coding	Up
ENSBTAG00000053937		4.8762	5.15128	-1.7484	protein_coding	Down
ENSBTAG00000054053		6.13563	5.83299	1.9578	lncRNA	Up
ENSBTAG00000054085	SELENOP	10.4696	10.1969	1.7656	protein_coding	Up
ENSBTAG00000054131	TWF2	10.8393	10.5702	1.74293	protein_coding	Up
ENSBTAG00000054179		4.99691	5.38107	-2.44821	protein_coding	Down
ENSBTAG00000054218	IGFBP5	9.52534	10.3141	-5.04352	protein_coding	Down
ENSBTAG00000054394		9.16058	9.44508	-1.80888	protein_coding	Down
ENSBTAG00000054592	SCN2B	4.95072	5.24759	-1.88816	protein_coding	Down
ENSBTAG00000054677		5.03582	4.69623	2.19483	lncRNA	Up
ENSBTAG00000054716		5.94241	5.59614	2.23766	lncRNA	Up
ENSBTAG00000054758		4.63361	5.30942	-4.31921	misc_RNA	Down
ENSBTAG00000054926		7.27804	7.00515	1.7669	protein_coding	Up
ENSBTAG00000055046		6.16934	6.47443	-1.9409	protein_coding	Down
ENSBTAG00000055183	HRCT1	5.22978	4.92762	1.95468	protein_coding	Up
ENSBTAG00000055197		4.78782	5.11029	-2.05243	protein_coding	Down
