# Supplementary material for: Supranutritional Maternal Organic Selenium Supplementation during Different Trimesters of Pregnancy Affects the Muscle Gene Transcriptome of Newborn Beef Calves in a Time-Dependent Manner
Source: Genes (Basel). 2021 Nov 25;12(12):1884. doi: 10.3390/genes12121884 (PMC8701265; doi:10.3390/genes12121884)
Supplement: Supplementary file 1 [file genes-12-01884-s001.zip › Supplementary Table S3_.xlsx]

## Sheet: Description
Supranutritional Maternal Organic Selenium Supplementation During Different Trimesters of Pregnancy Affects the Muscle Gene Transcriptome of Newborn Beef Calves in a Time-dependent Manner
Wellison J. S. Diniz 1,*; Gerd Bobe 2,3; Joseph J. Klopfenstein 4; Yunus Gultekin 2; T. Zane Davis 5; Alison K. Ward 6; Jean A. Hall 7,*
1 Department of Animal Sciences, Auburn University; Auburn, AL 3849, USA; wzd0027@auburn.edu 2 Department of Animal and Rangeland Sciences, College of Agricultural Sciences, Oregon State University, Corvallis, OR, USA; yunus.gultekin@oregonstate.edu; gerd.bobe@oregonstate.edu 3 Linus Pauling Institute, Oregon State University, Corvallis, OR 97331, USA; 4 Department of Clinical Sciences, Carlson C…
Data Description
Tab 1.	Differentially expressed genes between TR2 vs. CTR groups from muscle tissue.

## Sheet: Tab. 1
Differentaily expressed genes between TR2 vs. CTR groups from muscle tissue (FDR < 0.05 and |log2 fc| > 1.5)
Ensembl ID	Gene Symbol	TR2	CON	Diff	Gene_biotype	Status
ENSBTAG00000000033	PHOSPHO1	9.1181	9.44109	-1.71129	protein_coding	Down
ENSBTAG00000000042	PYCR1	7.37257	7.70963	-1.78713	protein_coding	Down
ENSBTAG00000000057	THBS3	5.42884	5.73056	-1.59663	protein_coding	Down
ENSBTAG00000000087	HSD17B12	8.24556	8.66322	-2.22163	protein_coding	Down
ENSBTAG00000000092	HIF1AN	10.0004	10.3098	-1.63786	protein_coding	Down
ENSBTAG00000000095	CD274	4.32221	4.80026	-2.54717	protein_coding	Down
ENSBTAG00000000111	UGP2	11.7885	11.484	1.67136	protein_coding	Up
ENSBTAG00000000115	VPS54	7.66881	7.39108	1.52718	protein_coding	Up
ENSBTAG00000000120	USP43	4.67685	5.04619	-1.96115	protein_coding	Down
ENSBTAG00000000125	SPATA5	6.91768	7.26436	-1.83895	protein_coding	Down
ENSBTAG00000000132	EIF4A1	10.2283	9.92832	1.6472	protein_coding	Up
ENSBTAG00000000140	EPHX1	8.48317	8.76952	-1.51378	protein_coding	Down
ENSBTAG00000000153	LRFN3	6.91504	6.62568	1.58985	protein_coding	Up
ENSBTAG00000000163	DDIT4	10.67	10.3172	1.93198	protein_coding	Up
ENSBTAG00000000182	SPINT2	9.39127	9.07829	1.71719	protein_coding	Up
ENSBTAG00000000211	SHROOM2	4.61365	4.96774	-1.87898	protein_coding	Down
ENSBTAG00000000223	PPM1B	11.3252	10.9541	2.03058	protein_coding	Up
ENSBTAG00000000233	OR51E1	6.65224	7.06842	-2.21365	protein_coding	Down
ENSBTAG00000000256	TLE1	8.608	8.9059	-1.576	protein_coding	Down
ENSBTAG00000000269		7.11624	7.51261	-2.10688	protein_coding	Down
ENSBTAG00000000275	PARP11	7.47003	7.76577	-1.56439	protein_coding	Down
ENSBTAG00000000286	PFKM	15.1641	14.8752	1.58722	protein_coding	Up
ENSBTAG00000000310	MFAP5	7.02641	7.75113	-3.87699	protein_coding	Down
ENSBTAG00000000313	NUDT13	6.63275	6.97647	-1.82304	protein_coding	Down
ENSBTAG00000000328	TPPP2	5.14547	4.61713	2.87819	protein_coding	Up
ENSBTAG00000000329	MEGF10	6.56039	7.02173	-2.45714	protein_coding	Down
ENSBTAG00000000377	BMX	5.37379	5.0878	1.57172	protein_coding	Up
ENSBTAG00000000387	NICN1	7.58932	7.99233	-2.14269	protein_coding	Down
ENSBTAG00000000390	TPST1	6.08208	5.69905	2.09484	protein_coding	Up
ENSBTAG00000000396	PIM1	7.1756	6.77197	2.2059	protein_coding	Up
ENSBTAG00000000428	BAK1	8.45194	8.75314	-1.59382	protein_coding	Down
ENSBTAG00000000448	BDH1	6.52781	6.14857	2.07444	protein_coding	Up
ENSBTAG00000000570	RET	7.90279	7.51761	2.10646	protein_coding	Up
ENSBTAG00000000588	CHODL	6.93081	7.6714	-3.96256	protein_coding	Down
ENSBTAG00000000607	ABCF2	10.1505	9.7328	2.28162	protein_coding	Up
ENSBTAG00000000647	SELENOO	9.80029	9.51703	1.55703	protein_coding	Up
ENSBTAG00000000671	PARP3	5.55757	5.26095	1.629	protein_coding	Up
ENSBTAG00000000742	AMOTL2	7.62165	7.21777	2.20723	protein_coding	Up
ENSBTAG00000000804	MOB3B	7.11897	6.73578	2.09572	protein_coding	Up
ENSBTAG00000000917	BMP1	7.91512	8.22103	-1.61921	protein_coding	Down
ENSBTAG00000000925	GLT8D2	6.08342	6.53399	-2.39908	protein_coding	Down
ENSBTAG00000000974	IARS1	9.50697	9.79243	-1.50896	protein_coding	Down
ENSBTAG00000000977	CADM1	6.92594	6.63867	1.57859	protein_coding	Up
ENSBTAG00000001009	HCLS1	5.5587	5.27596	1.55417	protein_coding	Up
ENSBTAG00000001027	SERPINH1	9.82408	10.2944	-2.50535	protein_coding	Down
ENSBTAG00000001035	SF1	10.7698	10.4605	1.69728	protein_coding	Up
ENSBTAG00000001050	LDLRAP1	6.98294	6.70238	1.54241	protein_coding	Up
ENSBTAG00000001058	SRPK3	10.6301	11.0584	-2.27918	protein_coding	Down
ENSBTAG00000001094	MTUS2	6.38069	6.68875	-1.63078	protein_coding	Down
ENSBTAG00000001096	PRKRA	5.90386	6.40373	-2.66483	protein_coding	Down
ENSBTAG00000001097	FKBP7	6.25452	6.65231	-2.11455	protein_coding	Down
ENSBTAG00000001101	IFNLR1	5.36224	4.91738	2.42814	protein_coding	Up
ENSBTAG00000001143		4.52814	5.17967	-3.48242	protein_coding	Down
ENSBTAG00000001156	ST3GAL1	5.58707	5.09937	2.65916	protein_coding	Up
ENSBTAG00000001257	AGTPBP1	7.91233	8.30822	-2.10431	protein_coding	Down
ENSBTAG00000001274	PPM1L	7.6516	7.30093	1.9204	protein_coding	Up
ENSBTAG00000001294	PPP1R15A	7.38553	7.08191	1.66678	protein_coding	Up
ENSBTAG00000001299	CYP7B1	4.73897	5.03485	-1.56516	protein_coding	Down
ENSBTAG00000001302	MRPS28	7.88997	8.24489	-1.88343	protein_coding	Down
ENSBTAG00000001305	ATP2B2	6.45403	7.04401	-3.15065	protein_coding	Down
ENSBTAG00000001308		4.50328	4.97907	-2.53504	protein_coding	Down
ENSBTAG00000001405	GLCE	6.94144	6.44671	2.69701	protein_coding	Up
ENSBTAG00000001417	ACSM1	4.24096	4.78187	-2.88612	protein_coding	Down
ENSBTAG00000001446	ABRACL	4.79888	5.08846	-1.5312	protein_coding	Down
ENSBTAG00000001471	POC1A	6.03323	5.46949	3.06903	protein_coding	Up
ENSBTAG00000001489	TUBA1A	8.92792	9.44378	-2.75104	protein_coding	Down
ENSBTAG00000001543	BRI3BP	5.32918	5.61726	-1.52305	protein_coding	Down
ENSBTAG00000001553	HNRNPA1	11.9006	11.4942	2.22088	protein_coding	Up
ENSBTAG00000001562	NFE2	5.1244	4.69014	2.37107	protein_coding	Up
ENSBTAG00000001603	YIPF7	9.35026	9.67135	-1.70101	protein_coding	Down
ENSBTAG00000001618	ALPK3	12.0931	11.5876	2.75535	protein_coding	Up
ENSBTAG00000001725	CXCL10	4.57763	4.93583	-1.90109	protein_coding	Down
ENSBTAG00000001745	LUM	7.50161	8.44723	-5.06783	protein_coding	Down
ENSBTAG00000001785	TGM3	4.92615	4.60375	1.76801	protein_coding	Up
ENSBTAG00000001788	PDPN	5.88462	5.55738	1.7941	protein_coding	Up
ENSBTAG00000001836		6.6754	6.96582	-1.53565	protein_coding	Down
ENSBTAG00000001840	INO80B	8.14238	7.82729	1.72863	protein_coding	Up
ENSBTAG00000001842	GSTM3	6.96264	7.31006	-1.84299	protein_coding	Down
ENSBTAG00000001843	WBP1	7.72143	8.00644	-1.50651	protein_coding	Down
ENSBTAG00000001851		5.50833	5.89892	-2.07568	protein_coding	Down
ENSBTAG00000001857	DOK4	6.303	5.97034	1.82331	protein_coding	Up
ENSBTAG00000001858		9.44888	7.90829	8.3352	protein_coding	Up
ENSBTAG00000001864	NR4A3	5.07914	4.68296	2.16571	protein_coding	Up
ENSBTAG00000001865	SGCG	9.90235	10.2836	-2.02509	protein_coding	Down
ENSBTAG00000001877	HMGN5	6.19323	6.61986	-2.27004	protein_coding	Down
ENSBTAG00000001922	AKIP1	6.79201	7.17934	-2.05813	protein_coding	Down
ENSBTAG00000001933	PTPA	10.768	11.0766	-1.63347	protein_coding	Down
ENSBTAG00000001936	PCK1	5.21111	4.83984	2.03145	protein_coding	Up
ENSBTAG00000001938	CKS2	4.81478	5.53351	-3.84465	protein_coding	Down
ENSBTAG00000001966	PDGFRL	5.88127	6.2614	-2.0193	protein_coding	Down
ENSBTAG00000001969	CCDC39	4.84897	5.37949	-2.83001	protein_coding	Down
ENSBTAG00000001988	EIF3D	10.8634	10.5704	1.60937	protein_coding	Up
ENSBTAG00000001992	CYP51A1	6.40984	6.88347	-2.52338	protein_coding	Down
ENSBTAG00000002006	THBS1	7.16858	6.88536	1.55677	protein_coding	Up
ENSBTAG00000002069	BOLA	9.9335	10.5397	-3.23796	protein_coding	Down
ENSBTAG00000002092	PI16	6.56952	7.04216	-2.51804	protein_coding	Down
ENSBTAG00000002101	GDE1	8.98919	9.29845	-1.63727	protein_coding	Down
ENSBTAG00000002126	PFKFB2	7.00786	7.39142	-2.03778	protein_coding	Down
ENSBTAG00000002127	TCP11L2	8.16822	7.87241	1.62462	protein_coding	Up
ENSBTAG00000002178	PPL	6.91407	6.58138	1.82348	protein_coding	Up
ENSBTAG00000002216	MYOD1	9.84809	9.46594	2.09011	protein_coding	Up
ENSBTAG00000002233	CPNE2	5.67039	5.32298	1.90281	protein_coding	Up
ENSBTAG00000002258	APOA1	5.85151	5.52341	1.79873	protein_coding	Up
ENSBTAG00000002261	LBX1	7.28339	6.86014	2.31171	protein_coding	Up
ENSBTAG00000002278	FBN1	8.70222	9.02899	-1.7317	protein_coding	Down
ENSBTAG00000002283	FZD7	7.95826	7.54622	2.25126	protein_coding	Up
ENSBTAG00000002299	SEL1L3	10.1517	10.4609	-1.63674	protein_coding	Down
ENSBTAG00000002321	AMT	8.20812	8.54099	-1.76457	protein_coding	Down
ENSBTAG00000002333	HOPX	5.7924	6.18301	-2.0758	protein_coding	Down
ENSBTAG00000002352	GGA2	9.7224	9.41463	1.68916	protein_coding	Up
ENSBTAG00000002392		8.43941	8.73504	-1.56378	protein_coding	Down
ENSBTAG00000002416		4.901	5.34156	-2.34508	protein_coding	Down
ENSBTAG00000002435	PTPRE	5.49878	5.80095	-1.59906	protein_coding	Down
ENSBTAG00000002473	ANGPTL4	7.62222	6.87428	4.06205	protein_coding	Up
ENSBTAG00000002478	AGMAT	5.27293	4.85695	2.27248	protein_coding	Up
ENSBTAG00000002485	TNS1	11.3083	11.0288	1.53701	protein_coding	Up
ENSBTAG00000002527	ZSWIM4	6.36014	6.04863	1.70926	protein_coding	Up
ENSBTAG00000002554	TCAF1	8.79379	9.0828	-1.52808	protein_coding	Down
ENSBTAG00000002606	LGR4	9.34184	9.64	-1.5774	protein_coding	Down
ENSBTAG00000002615	LONRF3	6.77075	6.41463	1.94979	protein_coding	Up
ENSBTAG00000002624	PSTPIP2	11.0652	10.6949	2.02591	protein_coding	Up
ENSBTAG00000002655	ZWINT	6.13603	6.5048	-1.95811	protein_coding	Down
ENSBTAG00000002669	RASSF4	6.25933	6.78119	-2.78337	protein_coding	Down
ENSBTAG00000002710	TSSK4	4.87644	5.17203	-1.56352	protein_coding	Down
ENSBTAG00000002747	ABCA5	8.22402	7.94659	1.5256	protein_coding	Up
ENSBTAG00000002783	PCYOX1	8.48193	8.87252	-2.07573	protein_coding	Down
ENSBTAG00000002786		4.59688	4.97416	-2.00395	protein_coding	Down
ENSBTAG00000002823	MPZL1	8.51615	8.85147	-1.77777	protein_coding	Down
ENSBTAG00000002843	ACOT4	7.64173	8.07157	-2.28727	protein_coding	Down
ENSBTAG00000002880	SORBS1	10.2809	9.65011	3.43032	protein_coding	Up
ENSBTAG00000002922	GAB2	7.75835	7.35587	2.19974	protein_coding	Up
ENSBTAG00000002939	FURIN	9.85836	9.34527	2.796	protein_coding	Up
ENSBTAG00000002944	ATP5MC3	12.8877	13.2126	-1.72173	protein_coding	Down
ENSBTAG00000002980	GPT2	9.49173	10.1022	-3.26107	protein_coding	Down
ENSBTAG00000002985	KCNMB1	5.26061	5.71738	-2.43244	protein_coding	Down
ENSBTAG00000003002	WDR75	8.17953	7.86091	1.74766	protein_coding	Up
ENSBTAG00000003018	FSTL3	6.17951	5.81125	2.01525	protein_coding	Up
ENSBTAG00000003033	GADD45G	8.83933	9.13101	-1.54249	protein_coding	Down
ENSBTAG00000003038	TAP2	7.0303	7.38513	-1.88294	protein_coding	Down
ENSBTAG00000003039	PSMB8	7.15167	7.49369	-1.81387	protein_coding	Down
ENSBTAG00000003068	MSMO1	7.75564	8.23121	-2.53384	protein_coding	Down
ENSBTAG00000003074	SLC16A6	11.5446	11.0464	2.71569	protein_coding	Up
ENSBTAG00000003100	SMTN	10.0802	10.4689	-2.06539	protein_coding	Down
ENSBTAG00000003137	PLPPR1	5.39624	5.91832	-2.78456	protein_coding	Down
ENSBTAG00000003152	IFI27	5.92562	6.87768	-5.10255	protein_coding	Down
ENSBTAG00000003165	ADAMTS9	7.21239	7.55563	-1.82044	protein_coding	Down
ENSBTAG00000003177	SLC25A33	7.28453	6.67993	3.28931	protein_coding	Up
ENSBTAG00000003186	OTULIN	7.24659	6.97002	1.52092	protein_coding	Up
ENSBTAG00000003222	ASNS	8.30389	9.23926	-5.01256	protein_coding	Down
ENSBTAG00000003275		7.23334	7.54594	-1.65521	protein_coding	Down
ENSBTAG00000003278	HOXC10	8.85465	7.99132	4.68416	protein_coding	Up
ENSBTAG00000003304	HOXC4	5.2023	5.85895	-3.51	protein_coding	Down
ENSBTAG00000003314	SKA3	4.56163	4.884	-1.70795	protein_coding	Down
ENSBTAG00000003328	TAMM41	6.25138	6.65188	-2.1291	protein_coding	Down
ENSBTAG00000003358	MCFD2	10.973	10.6922	1.54415	protein_coding	Up
ENSBTAG00000003369	SYT12	5.17139	5.5204	-1.85152	protein_coding	Down
ENSBTAG00000003403	PADI2	12.607	12.207	2.18661	protein_coding	Up
ENSBTAG00000003414	SAXO2	4.67377	5.02285	-1.85194	protein_coding	Down
ENSBTAG00000003438	ZBTB43	6.83411	6.47597	1.96063	protein_coding	Up
ENSBTAG00000003449	KCP	6.77657	7.30589	-2.82359	protein_coding	Down
ENSBTAG00000003457	ATF5	7.70348	8.10838	-2.15284	protein_coding	Down
ENSBTAG00000003458	CDCA7	5.53676	5.89845	-1.91992	protein_coding	Down
ENSBTAG00000003474	RAB15	7.19035	6.86109	1.80501	protein_coding	Up
ENSBTAG00000003481	OTUD6B	8.58359	8.16908	2.26457	protein_coding	Up
ENSBTAG00000003525	STXBP1	7.02731	7.45721	-2.2876	protein_coding	Down
ENSBTAG00000003545	TAF1D	7.0513	6.66268	2.12501	protein_coding	Up
ENSBTAG00000003604	ADAMTSL4	8.28306	7.99576	1.57877	protein_coding	Up
ENSBTAG00000003614	AP4B1	6.50006	6.93298	-2.30393	protein_coding	Down
ENSBTAG00000003634	CISD1	10.3659	10.7024	-1.7839	protein_coding	Down
ENSBTAG00000003692	UCP2	10.1434	9.5359	3.30479	protein_coding	Up
ENSBTAG00000003718	HACL1	7.65717	7.37205	1.56701	protein_coding	Up
ENSBTAG00000003773	SLC25A13	7.13247	7.41904	-1.51495	protein_coding	Down
ENSBTAG00000003806	ECM1	6.29904	6.66425	-1.93888	protein_coding	Down
ENSBTAG00000003809	PLCD4	10.1015	9.78168	1.75383	protein_coding	Up
ENSBTAG00000003845	CSRNP1	7.23759	6.63905	3.25669	protein_coding	Up
ENSBTAG00000003849	GNL2	8.62283	8.21595	2.22344	protein_coding	Up
ENSBTAG00000003901	DNMT3B	5.41963	5.13282	1.57615	protein_coding	Up
ENSBTAG00000003938	FNDC1	5.42532	5.80026	-1.99137	protein_coding	Down
ENSBTAG00000003948	FDPS	8.37308	8.73267	-1.90858	protein_coding	Down
ENSBTAG00000003959	ARHGAP24	7.47845	7.98243	-2.68698	protein_coding	Down
ENSBTAG00000003994	IGFBP3	8.52789	8.20622	1.76406	protein_coding	Up
ENSBTAG00000004011	GALK2	6.85787	7.1618	-1.60856	protein_coding	Down
ENSBTAG00000004034	SESN3	5.60165	5.89959	-1.57625	protein_coding	Down
ENSBTAG00000004036	GJC1	5.48753	5.19156	1.62554	protein_coding	Up
ENSBTAG00000004037	JUN	11.1952	10.7839	2.24758	protein_coding	Up
ENSBTAG00000004046	DTX4	8.01916	8.45782	-2.33484	protein_coding	Down
ENSBTAG00000004066	PARP8	6.18215	6.52701	-1.82917	protein_coding	Down
ENSBTAG00000004079	ZNF106	13.1564	13.5858	-2.285	protein_coding	Down
ENSBTAG00000004095	FAM166A	5.20772	5.65699	-2.39206	protein_coding	Down
ENSBTAG00000004112	GAMT	10.7098	11.179	-2.49914	protein_coding	Down
ENSBTAG00000004115	MYLIP	8.62603	8.23998	2.11118	protein_coding	Up
ENSBTAG00000004118	ALAS1	10.9481	11.3864	-2.33303	protein_coding	Down
ENSBTAG00000004159	SIX2	7.66671	8.21062	-2.90225	protein_coding	Down
ENSBTAG00000004189	MLXIP	11.958	11.6093	1.91006	protein_coding	Up
ENSBTAG00000004231	GPM6A	4.87124	5.18953	-1.68597	protein_coding	Down
ENSBTAG00000004237	BTC	9.37792	9.04599	1.81936	protein_coding	Up
ENSBTAG00000004248	MLYCD	10.3481	9.79196	3.02829	protein_coding	Up
ENSBTAG00000004249	TANC2	6.27458	6.64429	-1.96313	protein_coding	Down
ENSBTAG00000004258	EEF2	14.9768	14.4573	2.83026	protein_coding	Up
ENSBTAG00000004261	SPON2	6.76269	7.11795	-1.88525	protein_coding	Down
ENSBTAG00000004275	DKK3	6.19627	5.65008	2.97443	protein_coding	Up
ENSBTAG00000004287	EVC	6.03303	6.44648	-2.19895	protein_coding	Down
ENSBTAG00000004288	GSTA4	9.34627	9.66152	-1.66957	protein_coding	Down
ENSBTAG00000004322	FOS	8.01666	7.25526	4.13467	protein_coding	Up
ENSBTAG00000004347	ADGRF5	9.88685	9.47115	2.27099	protein_coding	Up
ENSBTAG00000004358	DARS2	7.28607	7.62193	-1.78065	protein_coding	Down
ENSBTAG00000004378	IL23A	5.54998	5.85531	-1.61604	protein_coding	Down
ENSBTAG00000004415		5.13234	4.80521	1.79352	protein_coding	Up
ENSBTAG00000004422	ALG14	6.653	6.9666	-1.66068	protein_coding	Down
ENSBTAG00000004511	VAV2	5.92397	6.24107	-1.67953	protein_coding	Down
ENSBTAG00000004587	DUSP6	6.59702	6.90243	-1.61652	protein_coding	Down
ENSBTAG00000004599	TAGLN3	5.82468	6.36001	-2.85602	protein_coding	Down
ENSBTAG00000004602	PITX1	6.01907	5.41401	3.29184	protein_coding	Up
ENSBTAG00000004622	DZANK1	6.0543	6.33836	-1.50139	protein_coding	Down
ENSBTAG00000004639	HARBI1	6.35412	6.07548	1.53209	protein_coding	Up
ENSBTAG00000004679	WARS1	9.83124	10.6222	-4.23414	protein_coding	Down
ENSBTAG00000004688	DHCR24	6.46796	6.99858	-2.83059	protein_coding	Down
ENSBTAG00000004792	CHMP4C	6.94957	7.25155	-1.59802	protein_coding	Down
ENSBTAG00000004824	REEP1	9.00051	9.36213	-1.91953	protein_coding	Down
ENSBTAG00000004832	KIF21A	7.34118	7.85925	-2.76297	protein_coding	Down
ENSBTAG00000004861	EIF3F	11.2755	10.9922	1.55729	protein_coding	Up
ENSBTAG00000004879	FOXO4	9.31575	9.03207	1.55928	protein_coding	Up
ENSBTAG00000004881	MTHFD2	6.10147	6.7487	-3.45925	protein_coding	Down
ENSBTAG00000004895	AFAP1L2	6.65956	6.98782	-1.73967	protein_coding	Down
ENSBTAG00000004908	CHRNE	8.0192	8.69482	-3.61227	protein_coding	Down
ENSBTAG00000004910	SLC25A11	12.1386	12.444	-1.61642	protein_coding	Down
ENSBTAG00000004931	POLE2	5.58883	5.92175	-1.76481	protein_coding	Down
ENSBTAG00000004950	BRB	5.83884	6.22604	-2.05747	protein_coding	Down
ENSBTAG00000005048	DHRS7C	12.0097	12.4753	-2.4803	protein_coding	Down
ENSBTAG00000005085	TRIM63	10.8747	10.5674	1.68665	protein_coding	Up
ENSBTAG00000005093	CES2	7.11999	6.75709	1.98635	protein_coding	Up
ENSBTAG00000005144	PNPLA2	10.9657	10.0528	4.95148	protein_coding	Up
ENSBTAG00000005146		6.26799	6.5931	-1.72271	protein_coding	Down
ENSBTAG00000005163	S100A1	7.43628	7.92519	-2.60577	protein_coding	Down
ENSBTAG00000005178	MMAB	7.42606	7.77556	-1.85417	protein_coding	Down
ENSBTAG00000005180	RBMS1	7.93269	8.2273	-1.55831	protein_coding	Down
ENSBTAG00000005186	DBNDD2	10.7151	10.4164	1.64037	protein_coding	Up
ENSBTAG00000005259	UCP3	10.2123	9.32195	4.82985	protein_coding	Up
ENSBTAG00000005304	SRM	7.96673	7.68397	1.55434	protein_coding	Up
ENSBTAG00000005312	MED26	7.279	6.91044	2.01688	protein_coding	Up
ENSBTAG00000005333	MB	15.7665	16.0724	-1.61902	protein_coding	Down
ENSBTAG00000005353	DES	16.2267	15.9226	1.66946	protein_coding	Up
ENSBTAG00000005355	BAG2	10.4451	10.1711	1.50699	protein_coding	Up
ENSBTAG00000005364	HMBS	9.76252	10.2664	-2.68623	protein_coding	Down
ENSBTAG00000005412	NEDD4L	9.21537	8.69622	2.82868	protein_coding	Up
ENSBTAG00000005431	LMCD1	11.7524	11.479	1.50385	protein_coding	Up
ENSBTAG00000005498	SQLE	6.59908	7.04399	-2.36852	protein_coding	Down
ENSBTAG00000005556	CYGB	7.29448	6.93509	1.96742	protein_coding	Up
ENSBTAG00000005583	HYI	6.5239	6.91359	-2.07085	protein_coding	Down
ENSBTAG00000005586	GATM	9.56719	9.90993	-1.81772	protein_coding	Down
ENSBTAG00000005604	POPDC2	8.33617	8.88498	-2.92869	protein_coding	Down
ENSBTAG00000005622	LITAF	7.27616	6.75855	2.82037	protein_coding	Up
ENSBTAG00000005666	LRRC20	8.19853	8.70596	-2.7056	protein_coding	Down
ENSBTAG00000005693	CCDC43	10.3332	10.7891	-2.42766	protein_coding	Down
ENSBTAG00000005714	ACTC1	12.2793	12.826	-2.91693	protein_coding	Down
ENSBTAG00000005716	CRABP2	5.03958	5.507	-2.48987	protein_coding	Down
ENSBTAG00000005718	PLIN2	7.9698	7.31064	3.58347	protein_coding	Up
ENSBTAG00000005738	ATP8B1	6.09936	5.72436	2.05155	protein_coding	Up
ENSBTAG00000005744	COQ2	8.43798	8.76503	-1.73315	protein_coding	Down
ENSBTAG00000005785	DPY19L1	7.31368	7.63407	-1.69726	protein_coding	Down
ENSBTAG00000005795	DHX32	9.1078	8.77284	1.83572	protein_coding	Up
ENSBTAG00000005814	PSME2	8.9889	9.34661	-1.89844	protein_coding	Down
ENSBTAG00000005835	PYCR2	7.96595	7.62008	1.8945	protein_coding	Up
ENSBTAG00000005857	SLC6A1	7.47918	8.13224	-3.49064	protein_coding	Down
ENSBTAG00000005865	MAPK6	12.0364	11.6963	1.86341	protein_coding	Up
ENSBTAG00000005897	FNTB	9.28283	8.68896	3.2315	protein_coding	Up
ENSBTAG00000006024	ISLR	6.39394	6.75375	-1.90979	protein_coding	Down
ENSBTAG00000006026	BEX3	6.39415	6.68234	-1.52366	protein_coding	Down
ENSBTAG00000006035	PPP1R1B	6.77002	6.16105	3.31291	protein_coding	Up
ENSBTAG00000006054	ACBD4	7.24921	7.54403	-1.55939	protein_coding	Down
ENSBTAG00000006080	MAST1	4.79929	5.08377	-1.50366	protein_coding	Down
ENSBTAG00000006121	SBK2	5.17442	5.46538	-1.53864	protein_coding	Down
ENSBTAG00000006135	MAP1LC3A	10.2302	9.88223	1.90561	protein_coding	Up
ENSBTAG00000006138	SEMA3C	8.90837	9.24373	-1.77793	protein_coding	Down
ENSBTAG00000006232	WDR86	7.31454	6.93756	2.06224	protein_coding	Up
ENSBTAG00000006253	FLNC	14.8185	14.4882	1.81031	protein_coding	Up
ENSBTAG00000006320	DBT	8.65578	8.34458	1.70763	protein_coding	Up
ENSBTAG00000006326	ALDH1L2	5.70586	6.21644	-2.72258	protein_coding	Down
ENSBTAG00000006347	UTP4	7.87574	7.39804	2.60524	protein_coding	Up
ENSBTAG00000006349	EXTL1	10.6588	11.2614	-3.21847	protein_coding	Down
ENSBTAG00000006354	HP	5.46664	4.94104	2.86346	protein_coding	Up
ENSBTAG00000006367	CCN2	7.43643	7.12519	1.70782	protein_coding	Up
ENSBTAG00000006383		7.57843	8.03855	-2.45053	protein_coding	Down
ENSBTAG00000006422	TRIM28	10.3596	10.0472	1.71397	protein_coding	Up
ENSBTAG00000006448	ERI2	5.42617	5.78736	-1.9172	protein_coding	Down
ENSBTAG00000006471	OSBPL11	8.89903	8.28748	3.32679	protein_coding	Up
ENSBTAG00000006486	TSEN34	7.00652	6.72489	1.54818	protein_coding	Up
ENSBTAG00000006487	RPS9	13.1525	12.8564	1.6262	protein_coding	Up
ENSBTAG00000006505	S100A9	5.6951	5.38611	1.69569	protein_coding	Up
ENSBTAG00000006526	BCL2L1	9.28553	8.94195	1.88221	protein_coding	Up
ENSBTAG00000006563	KLHL40	11.6066	11.0051	3.27261	protein_coding	Up
ENSBTAG00000006579	P4HA3	6.64056	6.02634	3.34122	protein_coding	Up
ENSBTAG00000006643	C6H4orf19	4.94382	5.23352	-1.53182	protein_coding	Down
ENSBTAG00000006645	LPAR6	7.21394	6.93221	1.54874	protein_coding	Up
ENSBTAG00000006680	NKIRAS1	8.69453	9.00427	-1.63987	protein_coding	Down
ENSBTAG00000006716	PTGS1	5.59252	5.94059	-1.84651	protein_coding	Down
ENSBTAG00000006752	PFKFB4	10.8545	10.0922	4.13936	protein_coding	Up
ENSBTAG00000006757	CA11	5.24	5.77651	-2.86239	protein_coding	Down
ENSBTAG00000006765	LARS1	9.48906	9.16154	1.79559	protein_coding	Up
ENSBTAG00000006776	KIAA0930	6.41029	6.10492	1.6762	protein_coding	Up
ENSBTAG00000006795	GCSH	8.95275	9.34104	-2.06331	protein_coding	Down
ENSBTAG00000006797	MARCHF3	5.8811	5.44623	2.37436	protein_coding	Up
ENSBTAG00000006821	PECR	8.81559	9.30791	-2.62414	protein_coding	Down
ENSBTAG00000006862	MEIS3	5.45878	5.77878	-1.69512	protein_coding	Down
ENSBTAG00000006902	KCNJ5	6.15103	6.70838	-2.97471	protein_coding	Down
ENSBTAG00000006921	ABCA6	6.90815	6.59966	1.69299	protein_coding	Up
ENSBTAG00000006963	RPL12	12.2024	11.8994	1.66337	protein_coding	Up
ENSBTAG00000006969	TUBB	11.929	12.3789	-2.39558	protein_coding	Down
ENSBTAG00000006977	PLP1	6.40006	6.70067	-1.59062	protein_coding	Down
ENSBTAG00000006985	TM7SF3	8.4087	8.7089	-1.58842	protein_coding	Down
ENSBTAG00000007075		6.35246	6.64347	-1.53883	protein_coding	Down
ENSBTAG00000007084	MAP3K14	8.79297	8.46789	1.78244	protein_coding	Up
ENSBTAG00000007111	STEAP3	8.4725	8.96227	-2.61035	protein_coding	Down
ENSBTAG00000007116	ARRDC3	8.66325	9.02177	-1.90281	protein_coding	Down
ENSBTAG00000007129	IRAG1	8.23854	7.94018	1.63841	protein_coding	Up
ENSBTAG00000007131	GADL1	12.7461	13.212	-2.48214	protein_coding	Down
ENSBTAG00000007141	GULP1	5.93041	5.44262	2.65962	protein_coding	Up
ENSBTAG00000007142	CPPED1	5.94374	6.24059	-1.57037	protein_coding	Down
ENSBTAG00000007148	F2	4.924	4.60255	1.7629	protein_coding	Up
ENSBTAG00000007173	PDGFRA	7.68089	8.08187	-2.13168	protein_coding	Down
ENSBTAG00000007196	TAGLN	9.22683	8.9042	1.76926	protein_coding	Up
ENSBTAG00000007204	KRT80	4.79418	4.48109	1.71781	protein_coding	Up
ENSBTAG00000007206	STRIP2	9.57045	9.16068	2.23904	protein_coding	Up
ENSBTAG00000007214	ELL2	7.78778	8.08623	-1.57899	protein_coding	Down
ENSBTAG00000007231	SPATA9	5.01951	4.68063	1.8568	protein_coding	Up
ENSBTAG00000007239	TNFAIP6	5.03526	5.35377	-1.68712	protein_coding	Down
ENSBTAG00000007253	TSPAN33	5.24558	5.54667	-1.59325	protein_coding	Down
ENSBTAG00000007268	F13A1	5.8752	6.23254	-1.89645	protein_coding	Down
ENSBTAG00000007315	LARS2	8.43737	8.76261	-1.72343	protein_coding	Down
ENSBTAG00000007325	TPSB2	4.73854	5.19499	-2.43075	protein_coding	Down
ENSBTAG00000007352	KCNC4	8.26203	8.57223	-1.6423	protein_coding	Down
ENSBTAG00000007363	LSM3	7.53801	7.8892	-1.86333	protein_coding	Down
ENSBTAG00000007379	ALK	6.33643	5.82575	2.78303	protein_coding	Up
ENSBTAG00000007389	IFI35	7.4945	7.79234	-1.57574	protein_coding	Down
ENSBTAG00000007394	RPL22L1	8.78638	8.4235	1.98622	protein_coding	Up
ENSBTAG00000007415	SLC7A8	9.19337	8.17653	5.51174	protein_coding	Up
ENSBTAG00000007417	GDF11	5.50663	5.89254	-2.05044	protein_coding	Down
ENSBTAG00000007434	CD300LG	8.81975	8.49914	1.75839	protein_coding	Up
ENSBTAG00000007435	NOLC1	9.20255	8.85866	1.88386	protein_coding	Up
ENSBTAG00000007447	NUDT4	10.4368	9.97792	2.5036	protein_coding	Up
ENSBTAG00000007455	DNASE1L1	10.4517	10.7755	-1.71581	protein_coding	Down
ENSBTAG00000007474	EIF3B	11.1428	10.8459	1.63066	protein_coding	Up
ENSBTAG00000007512	PLA2G15	6.69942	6.35132	1.90658	protein_coding	Up
ENSBTAG00000007554	IFI6	5.71574	6.05464	-1.79709	protein_coding	Down
ENSBTAG00000007599	IKBKB	7.80331	7.47895	1.77857	protein_coding	Up
ENSBTAG00000007660	ZNF414	6.55212	6.89472	-1.81701	protein_coding	Down
ENSBTAG00000007689	LPIN1	9.25182	8.28259	5.25503	protein_coding	Up
ENSBTAG00000007694		5.78529	5.44148	1.88342	protein_coding	Up
ENSBTAG00000007728	PES1	9.03871	8.7263	1.71414	protein_coding	Up
ENSBTAG00000007740	MDK	5.30451	5.69953	-2.0996	protein_coding	Down
ENSBTAG00000007743	PUS7	7.51067	7.20913	1.65558	protein_coding	Up
ENSBTAG00000007759	ABCB8	8.42621	8.75533	-1.74434	protein_coding	Down
ENSBTAG00000007763	SLC1A4	7.30142	7.67169	-1.96615	protein_coding	Down
ENSBTAG00000007766	CDK5	6.99118	7.29637	-1.61533	protein_coding	Down
ENSBTAG00000007778	TRPM3	5.56217	5.12868	2.36688	protein_coding	Up
ENSBTAG00000007807	HSPA2	7.7092	7.19772	2.78734	protein_coding	Up
ENSBTAG00000007820		4.64779	5.00754	-1.90942	protein_coding	Down
ENSBTAG00000007827	RCOR2	6.13209	6.65206	-2.77321	protein_coding	Down
ENSBTAG00000007834	PPP1R16A	7.40218	7.7651	-1.92651	protein_coding	Down
ENSBTAG00000007835	GPT	10.3014	10.673	-1.97287	protein_coding	Down
ENSBTAG00000007850	ITIH4	7.29383	6.97654	1.74044	protein_coding	Up
ENSBTAG00000007867	STAT1	9.74574	10.0776	-1.75902	protein_coding	Down
ENSBTAG00000007890	SEC14L5	7.14269	7.50504	-1.92343	protein_coding	Down
ENSBTAG00000007960	TOP1	9.01214	8.70446	1.68863	protein_coding	Up
ENSBTAG00000008013	LRRC2	9.07092	8.55604	2.80569	protein_coding	Up
ENSBTAG00000008026	OXT	7.86046	7.02601	4.52844	protein_coding	Up
ENSBTAG00000008028	CHN1	7.62158	8.27828	-3.51027	protein_coding	Down
ENSBTAG00000008103	ALDH1A1	8.83123	9.49208	-3.53266	protein_coding	Down
ENSBTAG00000008121	RSPO3	7.08475	6.79005	1.61864	protein_coding	Up
ENSBTAG00000008131	RNF115	8.63515	8.24057	2.15713	protein_coding	Up
ENSBTAG00000008154	LIMD2	6.8777	6.36513	2.7932	protein_coding	Up
ENSBTAG00000008175	ZNF713	5.01919	5.38019	-1.9162	protein_coding	Down
ENSBTAG00000008180	SPDL1	4.60919	5.10265	-2.63032	protein_coding	Down
ENSBTAG00000008182	FOSB	5.31475	4.85391	2.51434	protein_coding	Up
ENSBTAG00000008188	MOSMO	5.3009	5.74239	-2.3501	protein_coding	Down
ENSBTAG00000008192	PLPPR2	7.99418	8.49766	-2.68425	protein_coding	Down
ENSBTAG00000008216	RRM2	4.58653	4.89072	-1.60996	protein_coding	Down
ENSBTAG00000008232	DAB2IP	9.41673	9.74572	-1.74359	protein_coding	Down
ENSBTAG00000008236	OR51E2	5.08051	5.41079	-1.7506	protein_coding	Down
ENSBTAG00000008240	GALNT15	5.45028	4.95702	2.68909	protein_coding	Up
ENSBTAG00000008300	FN1	7.90128	8.57598	-3.6073	protein_coding	Down
ENSBTAG00000008313	KLF15	7.52414	7.05649	2.55109	protein_coding	Up
ENSBTAG00000008330	RNF19B	7.85007	7.5672	1.5549	protein_coding	Up
ENSBTAG00000008332	ENPEP	6.46005	6.91264	-2.40991	protein_coding	Down
ENSBTAG00000008347	MRPL48	8.12925	8.58797	-2.44301	protein_coding	Down
ENSBTAG00000008348	NOL4L	5.53544	5.84592	-1.64382	protein_coding	Down
ENSBTAG00000008353	CDKN1A	9.44143	9.02312	2.28508	protein_coding	Up
ENSBTAG00000008376	SMRP1	9.21012	9.4992	-1.52846	protein_coding	Down
ENSBTAG00000008385	KLHL36	6.77563	6.37627	2.18287	protein_coding	Up
ENSBTAG00000008389	HTRA1	9.67589	9.39295	1.55526	protein_coding	Up
ENSBTAG00000008401	PFKFB3	9.23584	8.45574	4.23545	protein_coding	Up
ENSBTAG00000008409	MYC	9.58735	9.28895	1.63863	protein_coding	Up
ENSBTAG00000008414	ZFR	9.5037	9.20083	1.66277	protein_coding	Up
ENSBTAG00000008419	PDE2A	8.49141	8.20812	1.55717	protein_coding	Up
ENSBTAG00000008437	PCDH12	6.44905	6.83727	-2.06292	protein_coding	Down
ENSBTAG00000008439	AP5S1	7.41481	7.71368	-1.58123	protein_coding	Down
ENSBTAG00000008464	ABCB9	6.26543	6.5855	-1.69554	protein_coding	Down
ENSBTAG00000008471	MX2	4.84423	5.66183	-4.37771	protein_coding	Down
ENSBTAG00000008528	SLC25A1	9.2619	8.9862	1.51623	protein_coding	Up
ENSBTAG00000008545	ATF3	8.14618	7.2166	5.04129	protein_coding	Up
ENSBTAG00000008573	ZFP36	9.20453	8.85722	1.90228	protein_coding	Up
ENSBTAG00000008583	PALD1	6.25727	6.54645	-1.52903	protein_coding	Down
ENSBTAG00000008613	TCP11L1	6.78947	7.10904	-1.6928	protein_coding	Down
ENSBTAG00000008661	C15H11orf52	6.69597	6.03667	3.58421	protein_coding	Up
ENSBTAG00000008709	POGLUT3	5.96427	6.3114	-1.84141	protein_coding	Down
ENSBTAG00000008713	DCAF4	7.69392	7.27897	2.26692	protein_coding	Up
ENSBTAG00000008717	SERPINE2	7.19886	6.80584	2.14867	protein_coding	Up
ENSBTAG00000008739	SAMD11	8.07521	8.48138	-2.15969	protein_coding	Down
ENSBTAG00000008743	ALDH2	10.9817	10.4887	2.68777	protein_coding	Up
ENSBTAG00000008747	DCXR	6.55952	6.1766	2.09425	protein_coding	Up
ENSBTAG00000008755	MARCHF7	9.99151	9.65226	1.85881	protein_coding	Up
ENSBTAG00000008761	TRAFD1	8.35024	8.07345	1.52216	protein_coding	Up
ENSBTAG00000008762	HECTD4	8.20163	8.52647	-1.72127	protein_coding	Down
ENSBTAG00000008792	RNASE6	5.08971	5.44348	-1.87724	protein_coding	Down
ENSBTAG00000008798	DRC3	5.32306	5.61038	-1.51901	protein_coding	Down
ENSBTAG00000008807	FBXL22	7.77296	8.29614	-2.79048	protein_coding	Down
ENSBTAG00000008816	TRIM2	8.84664	9.27874	-2.29949	protein_coding	Down
ENSBTAG00000008817	LAMA4	8.06609	8.44092	-1.99072	protein_coding	Down
ENSBTAG00000008836	ZNF782	5.68629	6.00458	-1.6859	protein_coding	Down
ENSBTAG00000008840	HM13	8.56683	8.29284	1.50702	protein_coding	Up
ENSBTAG00000008849	SORT1	8.67834	8.26594	2.25316	protein_coding	Up
ENSBTAG00000008866	GANC	7.50261	7.8672	-1.93551	protein_coding	Down
ENSBTAG00000008913	TMEM98	5.40982	6.06676	-3.51155	protein_coding	Down
ENSBTAG00000008920	ATP1B4	10.8365	11.2256	-2.06782	protein_coding	Down
ENSBTAG00000008937	CELF2	7.23985	6.94721	1.60758	protein_coding	Up
ENSBTAG00000008940	NPTX1	5.03857	4.37845	3.58863	protein_coding	Up
ENSBTAG00000008951	ALPL	7.13159	6.47391	3.57548	protein_coding	Up
ENSBTAG00000008953	TAP1	7.15921	7.70955	-2.93692	protein_coding	Down
ENSBTAG00000008954	PSMB9	5.64342	6.23535	-3.16115	protein_coding	Down
ENSBTAG00000008997	ENG	9.39009	9.10162	1.5851	protein_coding	Up
ENSBTAG00000009042	ATXN7L2	8.43954	8.96251	-2.78936	protein_coding	Down
ENSBTAG00000009047	YPEL3	9.77423	9.19264	3.1653	protein_coding	Up
ENSBTAG00000009048	EFHD2	7.02851	6.57222	2.48977	protein_coding	Up
ENSBTAG00000009050	ADIPOR2	9.7438	9.32493	2.28807	protein_coding	Up
ENSBTAG00000009065	MAP3K5	7.19003	7.51487	-1.72126	protein_coding	Down
ENSBTAG00000009080	ITGB6	9.09227	9.66003	-3.03081	protein_coding	Down
ENSBTAG00000009115	SPSB4	6.29263	6.65112	-1.90269	protein_coding	Down
ENSBTAG00000009145	SLC7A4	6.26111	6.66978	-2.17318	protein_coding	Down
ENSBTAG00000009148	GPA33	5.99147	5.34342	3.52357	protein_coding	Up
ENSBTAG00000009150	SPON1	6.69705	6.21846	2.61004	protein_coding	Up
ENSBTAG00000009190	SLC2A4	11.1884	10.9106	1.52732	protein_coding	Up
ENSBTAG00000009213	TOMM40L	8.68478	9.07663	-2.08247	protein_coding	Down
ENSBTAG00000009215	NR1I3	5.52634	5.87437	-1.84626	protein_coding	Down
ENSBTAG00000009265	NR5A2	5.32889	5.03028	1.63975	protein_coding	Up
ENSBTAG00000009287	EBP	7.1593	7.49802	-1.79607	protein_coding	Down
ENSBTAG00000009507	PHETA2	5.88647	6.1943	-1.62956	protein_coding	Down
ENSBTAG00000009513	TGFBI	6.91059	7.27454	-1.93208	protein_coding	Down
ENSBTAG00000009517	DBI	9.94633	10.5825	-3.39972	protein_coding	Down
ENSBTAG00000009617	SLC2A1	6.08993	5.66637	2.31333	protein_coding	Up
ENSBTAG00000009634	HOXC5	5.66891	6.49426	-4.41946	protein_coding	Down
ENSBTAG00000009655	TNS3	7.02662	6.55127	2.59258	protein_coding	Up
ENSBTAG00000009656		5.6611	6.29047	-3.36295	protein_coding	Down
ENSBTAG00000009663	YBX3	15.9247	15.5955	1.80478	protein_coding	Up
ENSBTAG00000009664		5.71803	6.01744	-1.58414	protein_coding	Down
ENSBTAG00000009694	PUS10	7.23065	7.53079	-1.58805	protein_coding	Down
ENSBTAG00000009705	SERPINF1	7.2373	7.82732	-3.15082	protein_coding	Down
ENSBTAG00000009768	IFIT3	5.20799	5.52749	-1.69247	protein_coding	Down
ENSBTAG00000009770	GPD2	8.42551	7.93758	2.66035	protein_coding	Up
ENSBTAG00000009772	LIX1	5.97295	6.33938	-1.94545	protein_coding	Down
ENSBTAG00000009786	SCIN	5.77264	6.24069	-2.49325	protein_coding	Down
ENSBTAG00000009830	PLEKHB1	6.28136	6.6657	-2.042	protein_coding	Down
ENSBTAG00000009844	CCN1	9.16688	8.85665	1.70236	protein_coding	Up
ENSBTAG00000009852	NAV3	5.38926	5.74103	-1.86639	protein_coding	Down
ENSBTAG00000009879	PCGF6	6.40495	5.92238	2.63146	protein_coding	Up
ENSBTAG00000009907	MAPK4	5.67681	6.14097	-2.4723	protein_coding	Down
ENSBTAG00000009923	CIPC	10.6141	10.3082	1.67879	protein_coding	Up
ENSBTAG00000009959	SLC6A8	9.90921	9.63096	1.53	protein_coding	Up
ENSBTAG00000009972	INHA	10.057	10.752	-3.71664	protein_coding	Down
ENSBTAG00000009996	DOT1L	9.80095	9.42403	2.0619	protein_coding	Up
ENSBTAG00000010069	EGR1	7.28014	6.90317	2.06219	protein_coding	Up
ENSBTAG00000010101	BYSL	8.01785	7.59733	2.29698	protein_coding	Up
ENSBTAG00000010120	HERC3	7.90823	8.26998	-1.92023	protein_coding	Down
ENSBTAG00000010175	COL8A2	7.77516	8.39338	-3.3029	protein_coding	Down
ENSBTAG00000010180	URB2	7.36877	7.06769	1.65304	protein_coding	Up
ENSBTAG00000010191	PAK1	8.20867	8.7649	-2.96864	protein_coding	Down
ENSBTAG00000010223	NTF3	4.89912	4.62025	1.53336	protein_coding	Up
ENSBTAG00000010284	ETNPPL	9.14115	9.89015	-4.0079	protein_coding	Down
ENSBTAG00000010389	STBD1	10.1959	10.947	-4.01936	protein_coding	Down
ENSBTAG00000010477	TTC21A	4.70568	5.00393	-1.57788	protein_coding	Down
ENSBTAG00000010509	CDK3	6.934	7.24197	-1.63032	protein_coding	Down
ENSBTAG00000010549	IFRD1	8.62948	8.08592	2.96026	protein_coding	Up
ENSBTAG00000010555	LSMEM1	9.70035	10.2473	-2.91839	protein_coding	Down
ENSBTAG00000010571	PPAT	10.2938	9.9261	2.01204	protein_coding	Up
ENSBTAG00000010587	SH3BGRL	7.77336	8.19618	-2.24947	protein_coding	Down
ENSBTAG00000010597	GGCT	5.34522	5.87078	-2.80329	protein_coding	Down
ENSBTAG00000010602	DDX56	8.41794	8.12177	1.6266	protein_coding	Up
ENSBTAG00000010610	DDIT4L	12.2514	11.892	1.96703	protein_coding	Up
ENSBTAG00000010635	RAB3A	6.9916	7.32648	-1.77538	protein_coding	Down
ENSBTAG00000010637	ARSG	9.81009	9.36513	2.42874	protein_coding	Up
ENSBTAG00000010645	BOLA-DRA	8.10134	8.8693	-4.11009	protein_coding	Down
ENSBTAG00000010658	PFKL	7.64164	7.93235	-1.53723	protein_coding	Down
ENSBTAG00000010661	DPYSL3	7.41076	7.71533	-1.61198	protein_coding	Down
ENSBTAG00000010664	PRKCQ	9.05079	8.67873	2.03569	protein_coding	Up
ENSBTAG00000010701	NACA	11.3388	11.0386	1.64838	protein_coding	Up
ENSBTAG00000010717	SSBP3	8.03893	7.64532	2.15189	protein_coding	Up
ENSBTAG00000010719	ANGPTL1	6.67559	7.08684	-2.18708	protein_coding	Down
ENSBTAG00000010741	KLHL41	15.4036	15.1142	1.59027	protein_coding	Up
ENSBTAG00000010760	REV3L	9.63979	9.36194	1.52786	protein_coding	Up
ENSBTAG00000010793	CCDC80	7.45055	8.28636	-4.47587	protein_coding	Down
ENSBTAG00000010801	CMBL	9.24088	9.70092	-2.45009	protein_coding	Down
ENSBTAG00000010841	FMO5	5.22416	5.52821	-1.60919	protein_coding	Down
ENSBTAG00000010849	ANKRD23	14.653	14.9412	-1.52401	protein_coding	Down
ENSBTAG00000010877	ARMC12	7.17723	6.26587	4.94307	protein_coding	Up
ENSBTAG00000010913	SRXN1	5.45037	5.11925	1.81501	protein_coding	Up
ENSBTAG00000010932	DNAJC12	6.70361	7.25597	-2.94778	protein_coding	Down
ENSBTAG00000010943	SLC22A23	7.62533	7.25828	2.00873	protein_coding	Up
ENSBTAG00000010954	ART3	11.5419	10.9308	3.32431	protein_coding	Up
ENSBTAG00000010976	KANK1	9.52865	9.84097	-1.65377	protein_coding	Down
ENSBTAG00000011017	ABI2	5.35335	5.63807	-1.50497	protein_coding	Down
ENSBTAG00000011045	MRPS36	10.4939	10.9359	-2.35238	protein_coding	Down
ENSBTAG00000011079	C18H19orf48	7.50874	7.09588	2.25568	protein_coding	Up
ENSBTAG00000011101	EML6	6.99237	7.46813	-2.53486	protein_coding	Down
ENSBTAG00000011102	TPCN1	8.39086	8.8051	-2.20316	protein_coding	Down
ENSBTAG00000011104	RTN4	13.7372	14.0342	-1.57114	protein_coding	Down
ENSBTAG00000011108	USP54	7.60868	7.24496	1.99076	protein_coding	Up
ENSBTAG00000011116	PAQR9	5.6445	5.34781	1.62941	protein_coding	Up
ENSBTAG00000011121	CLCN4	8.25029	8.67418	-2.25522	protein_coding	Down
ENSBTAG00000011137	MORN4	5.2797	5.65046	-1.96876	protein_coding	Down
ENSBTAG00000011139	BCHE	5.58293	5.99965	-2.21656	protein_coding	Down
ENSBTAG00000011179	PDCD2	7.34285	7.04338	1.64437	protein_coding	Up
ENSBTAG00000011187	FAM13A	8.4529	8.17885	1.50736	protein_coding	Up
ENSBTAG00000011193	C1QC	5.56897	5.89889	-1.74864	protein_coding	Down
ENSBTAG00000011202	CARD19	8.12752	8.43306	-1.6172	protein_coding	Down
ENSBTAG00000011234	FOXO3	7.31878	6.96421	1.94145	protein_coding	Up
ENSBTAG00000011246	FOXP2	5.20103	4.92191	1.53466	protein_coding	Up
ENSBTAG00000011266	ZBTB16	7.68938	7.2136	2.59487	protein_coding	Up
ENSBTAG00000011298	EYA1	7.25412	7.59703	-1.8187	protein_coding	Down
ENSBTAG00000011307	DNM1	5.62733	5.94649	-1.69064	protein_coding	Down
ENSBTAG00000011327	OLFML3	7.01738	7.39989	-2.03213	protein_coding	Down
ENSBTAG00000011332	TRIM68	8.62192	8.97133	-1.85371	protein_coding	Down
ENSBTAG00000011338	NREP	12.3818	12.8342	-2.40897	protein_coding	Down
ENSBTAG00000011437		7.79233	7.21677	3.13281	protein_coding	Up
ENSBTAG00000011454	FKBP10	6.09874	6.63187	-2.84412	protein_coding	Down
ENSBTAG00000011465	MYBPH	13.4812	12.7612	3.91151	protein_coding	Up
ENSBTAG00000011467	BATF2	5.57495	5.90068	-1.72605	protein_coding	Down
ENSBTAG00000011482	SLC43A2	9.75414	9.01142	4.03393	protein_coding	Up
ENSBTAG00000011483	SCARF1	11.2412	10.718	2.85023	protein_coding	Up
ENSBTAG00000011500	CASQ2	10.8326	11.6511	-4.38275	protein_coding	Down
ENSBTAG00000011515	SELL	5.16225	5.45221	-1.53323	protein_coding	Down
ENSBTAG00000011528	SMIM11A	8.76567	9.11293	-1.84212	protein_coding	Down
ENSBTAG00000011530	CDH15	8.53862	8.15421	2.10229	protein_coding	Up
ENSBTAG00000011628	EGFR	6.4952	6.08831	2.22347	protein_coding	Up
ENSBTAG00000011632	MAP1LC3B	10.4132	10.138	1.51338	protein_coding	Up
ENSBTAG00000011651	HECTD2	6.08	6.54014	-2.45064	protein_coding	Down
ENSBTAG00000011659	PIGZ	8.39118	9.04497	-3.49464	protein_coding	Down
ENSBTAG00000011677	H1-2	5.77742	5.40879	2.01721	protein_coding	Up
ENSBTAG00000011693	LENG9	6.07992	5.78347	1.62814	protein_coding	Up
ENSBTAG00000011733	GIPC2	6.97787	6.6969	1.54464	protein_coding	Up
ENSBTAG00000011734	ANKRD1	11.7144	11.2311	2.63492	protein_coding	Up
ENSBTAG00000011742	TNIK	7.11342	7.50078	-2.05829	protein_coding	Down
ENSBTAG00000011744	USP31	6.38385	6.07221	1.71001	protein_coding	Up
ENSBTAG00000011762	ANKRD52	8.18296	7.87643	1.68247	protein_coding	Up
ENSBTAG00000011765	GABARAPL1	9.0732	8.68585	2.11813	protein_coding	Up
ENSBTAG00000011788	CXHXorf38	5.68687	6.04839	-1.91897	protein_coding	Down
ENSBTAG00000011798	STK38L	6.74506	6.39619	1.91072	protein_coding	Up
ENSBTAG00000011810	ANGPTL2	7.48885	7.80694	-1.68484	protein_coding	Down
ENSBTAG00000011824	OGN	8.31074	8.69929	-2.06466	protein_coding	Down
ENSBTAG00000011866	PCBD1	6.47467	6.92103	-2.37635	protein_coding	Down
ENSBTAG00000011869	CSRP3	13.6752	13.273	2.19799	protein_coding	Up
ENSBTAG00000011896	GRIP2	8.58029	9.03895	-2.44263	protein_coding	Down
ENSBTAG00000011908	CPQ	4.73825	5.04112	-1.60281	protein_coding	Down
ENSBTAG00000011934	PCK2	5.91327	6.52268	-3.25534	protein_coding	Down
ENSBTAG00000011937	RITA1	7.5075	7.12491	2.09244	protein_coding	Up
ENSBTAG00000011960	GOT1	11.8092	12.1006	-1.54097	protein_coding	Down
ENSBTAG00000012007	SOCS2	7.56406	8.10963	-2.91119	protein_coding	Down
ENSBTAG00000012019	IRS2	6.52138	6.08303	2.3931	protein_coding	Up
ENSBTAG00000012030	TTLL1	6.14789	6.46533	-1.68137	protein_coding	Down
ENSBTAG00000012035	EXOC3L1	5.14926	5.45725	-1.63042	protein_coding	Down
ENSBTAG00000012046	JUNB	7.60002	7.2543	1.89369	protein_coding	Up
ENSBTAG00000012047	JAK2	7.71821	8.01079	-1.54734	protein_coding	Down
ENSBTAG00000012069	CCDC167	5.41864	5.70507	-1.51418	protein_coding	Down
ENSBTAG00000012070	INTS2	6.72967	7.06066	-1.75442	protein_coding	Down
ENSBTAG00000012073	VOPP1	6.70496	6.36442	1.86578	protein_coding	Up
ENSBTAG00000012082	TNFRSF12A	9.33136	8.83551	2.70305	protein_coding	Up
ENSBTAG00000012083	IRX3	5.84225	5.25727	3.18354	protein_coding	Up
ENSBTAG00000012087	NHLRC1	7.69433	7.2696	2.31962	protein_coding	Up
ENSBTAG00000012088	FBLN1	6.9071	7.35808	-2.40124	protein_coding	Down
ENSBTAG00000012102	TCF25	10.4227	10.137	1.57022	protein_coding	Up
ENSBTAG00000012112	SLC7A6	7.01664	6.58687	2.34685	protein_coding	Up
ENSBTAG00000012163	ITGB1BP2	8.53978	8.94312	-2.14442	protein_coding	Down
ENSBTAG00000012212	CYP26B1	6.44956	6.03072	2.28789	protein_coding	Up
ENSBTAG00000012243	POLR1E	7.50746	7.06837	2.39705	protein_coding	Up
ENSBTAG00000012244	TUBA1B	10.5523	10.9419	-2.07035	protein_coding	Down
ENSBTAG00000012259	PNPO	7.41953	7.74592	-1.7296	protein_coding	Down
ENSBTAG00000012263	ASAP3	6.20554	6.50791	-1.60009	protein_coding	Down
ENSBTAG00000012265	VWF	9.46844	9.14798	1.75752	protein_coding	Up
ENSBTAG00000012285	ESRRB	7.11123	6.67653	2.3734	protein_coding	Up
ENSBTAG00000012297	RIPOR3	6.31816	6.02905	1.58854	protein_coding	Up
ENSBTAG00000012314	LDLR	6.82967	7.25275	-2.25083	protein_coding	Down
ENSBTAG00000012319	KCNE5	6.6124	7.36046	-4.00283	protein_coding	Down
ENSBTAG00000012330	B2M	9.93497	10.342	-2.16426	protein_coding	Down
ENSBTAG00000012335	UBA7	7.07962	7.51223	-2.30223	protein_coding	Down
ENSBTAG00000012393	AGT	6.64858	6.10051	2.98456	protein_coding	Up
ENSBTAG00000012409	POSTN	5.66194	6.55336	-4.77567	protein_coding	Down
ENSBTAG00000012450	RAPGEF2	9.33004	8.86395	2.54261	protein_coding	Up
ENSBTAG00000012451	BOLA-DMB	6.52208	7.15665	-3.39102	protein_coding	Down
ENSBTAG00000012481	RANGAP1	9.89206	9.59079	1.65412	protein_coding	Up
ENSBTAG00000012519	XDH	10.0981	9.05044	5.67779	protein_coding	Up
ENSBTAG00000012647	ERBB4	5.44709	5.17022	1.52255	protein_coding	Up
ENSBTAG00000012673	CDK18	5.55934	5.93593	-2.00021	protein_coding	Down
ENSBTAG00000012674	CNKSR3	7.00026	7.36443	-1.93326	protein_coding	Down
ENSBTAG00000012738	ZNF827	6.63936	6.98901	-1.85499	protein_coding	Down
ENSBTAG00000012745	PPAN	8.3449	8.03182	1.71774	protein_coding	Up
ENSBTAG00000012779	CYRIA	5.96007	5.67179	1.58408	protein_coding	Up
ENSBTAG00000012828	TBC1D15	8.36746	8.01991	1.90357	protein_coding	Up
ENSBTAG00000012834	ARSI	6.0381	5.71744	1.75861	protein_coding	Up
ENSBTAG00000012837	COL6A6	5.17169	5.75478	-3.11347	protein_coding	Down
ENSBTAG00000012848	PTPRU	5.88423	5.52595	1.96143	protein_coding	Up
ENSBTAG00000012861	KIF4A	5.02918	5.34172	-1.65493	protein_coding	Down
ENSBTAG00000012896	METTL7B	5.06155	4.63858	2.31014	protein_coding	Up
ENSBTAG00000012940	TMEM25	5.49603	5.89677	-2.13043	protein_coding	Down
ENSBTAG00000012946	HSF2	8.88714	8.57988	1.68638	protein_coding	Up
ENSBTAG00000012962	SARS1	10.362	10.6564	-1.5568	protein_coding	Down
ENSBTAG00000012987	ULK1	10.2349	9.74886	2.65016	protein_coding	Up
ENSBTAG00000012991	PRUNE2	5.53182	5.84289	-1.647	protein_coding	Down
ENSBTAG00000013018	AMPD2	6.74855	6.44358	1.67404	protein_coding	Up
ENSBTAG00000013029	ARNTL	6.93568	6.44383	2.68152	protein_coding	Up
ENSBTAG00000013045	DKC1	9.33456	9.02149	1.7177	protein_coding	Up
ENSBTAG00000013081	PSPH	7.37975	8.48947	-5.95256	protein_coding	Down
ENSBTAG00000013096	UNC119	5.45221	5.77444	-1.70717	protein_coding	Down
ENSBTAG00000013103	COL1A1	10.2355	10.8564	-3.31699	protein_coding	Down
ENSBTAG00000013108	HK2	9.63442	9.1594	2.59078	protein_coding	Up
ENSBTAG00000013152	NIPSNAP1	7.04328	7.32878	-1.50914	protein_coding	Down
ENSBTAG00000013163	ADAM33	6.50912	7.00691	-2.65361	protein_coding	Down
ENSBTAG00000013166	SMYD2	10.4057	10.1167	1.58802	protein_coding	Up
ENSBTAG00000013178	ALAS2	4.96098	5.34125	-2.02006	protein_coding	Down
ENSBTAG00000013210	ADAMTS4	5.5052	5.22587	1.53581	protein_coding	Up
ENSBTAG00000013222	CD109	7.23117	7.62475	-2.09185	protein_coding	Down
ENSBTAG00000013231	C8H9orf40	7.63875	7.32372	1.72828	protein_coding	Up
ENSBTAG00000013235	TINAGL1	8.71122	8.26836	2.41741	protein_coding	Up
ENSBTAG00000013306	ZBTB7C	5.92771	6.32558	-2.11495	protein_coding	Down
ENSBTAG00000013343	FTL	9.5895	9.31036	1.53476	protein_coding	Up
ENSBTAG00000013347	DMPK	12.0394	12.4253	-2.0505	protein_coding	Down
ENSBTAG00000013369	COL14A1	7.01216	7.43238	-2.23547	protein_coding	Down
ENSBTAG00000013371	RUBCNL	4.81802	5.20853	-2.07523	protein_coding	Down
ENSBTAG00000013401	ARHGEF40	8.32895	7.90284	2.32714	protein_coding	Up
ENSBTAG00000013414	BLVRA	8.24568	8.73255	-2.59475	protein_coding	Down
ENSBTAG00000013423	GLRX5	10.6594	11.1002	-2.34623	protein_coding	Down
ENSBTAG00000013472	COL1A2	10.5249	11.1168	-3.16095	protein_coding	Down
ENSBTAG00000013475	TRAF3	6.72798	7.05593	-1.73801	protein_coding	Down
ENSBTAG00000013491	EML1	9.43693	9.85892	-2.24498	protein_coding	Down
ENSBTAG00000013496	CPM	6.27991	5.96038	1.75257	protein_coding	Up
ENSBTAG00000013513	ATP6V1C1	10.699	9.84046	4.65806	protein_coding	Up
ENSBTAG00000013524	CMIP	7.50853	7.18992	1.74754	protein_coding	Up
ENSBTAG00000013573	BIRC5	4.85654	5.20927	-1.87158	protein_coding	Down
ENSBTAG00000013611	SCLT1	5.65126	5.99286	-1.81161	protein_coding	Down
ENSBTAG00000013631	GLUL	13.2853	12.1845	5.96428	protein_coding	Up
ENSBTAG00000013645	RFFL	5.86272	5.58638	1.5197	protein_coding	Up
ENSBTAG00000013662	COL8A1	5.57289	5.9639	-2.078	protein_coding	Down
ENSBTAG00000013671	UTP14A	9.54346	9.20218	1.86975	protein_coding	Up
ENSBTAG00000013735	TBCE	8.2453	8.55986	-1.66586	protein_coding	Down
ENSBTAG00000013744	SYNPO	13.6866	13.391	1.62364	protein_coding	Up
ENSBTAG00000013749	RHOQ	10.378	10.6978	-1.69399	protein_coding	Down
ENSBTAG00000013801	PBX1	6.27008	6.57047	-1.58948	protein_coding	Down
ENSBTAG00000013825	BCAT1	6.26059	5.90689	1.93675	protein_coding	Up
ENSBTAG00000013836		4.84742	5.19662	-1.85256	protein_coding	Down
ENSBTAG00000013860	GADD45A	9.56659	9.10014	2.5446	protein_coding	Up
ENSBTAG00000013863	DUSP1	11.0562	10.7516	1.67219	protein_coding	Up
ENSBTAG00000013919		8.22485	8.77068	-2.91262	protein_coding	Down
ENSBTAG00000013927	GSTCD	6.2932	6.69603	-2.14167	protein_coding	Down
ENSBTAG00000013929	RRAD	10.5809	10.0854	2.70122	protein_coding	Up
ENSBTAG00000013960	PSAT1	7.45671	8.62431	-6.26456	protein_coding	Down
ENSBTAG00000013980	SOD3	6.542	6.99423	-2.40799	protein_coding	Down
ENSBTAG00000013983	ZC2HC1C	4.60648	5.06638	-2.44935	protein_coding	Down
ENSBTAG00000014003	MYF6	10.6758	10.4028	1.50183	protein_coding	Up
ENSBTAG00000014031	TLR6	4.69867	4.9985	-1.58643	protein_coding	Down
ENSBTAG00000014032	EIF3H	11.3296	11.0558	1.50603	protein_coding	Up
ENSBTAG00000014051	ANGPT1	6.84655	7.32488	-2.54871	protein_coding	Down
ENSBTAG00000014069	PDK4	13.0166	12.3313	3.72427	protein_coding	Up
ENSBTAG00000014132	SNED1	6.69944	6.3356	1.99139	protein_coding	Up
ENSBTAG00000014151	RCSD1	10.5223	10.8668	-1.82732	protein_coding	Down
ENSBTAG00000014153	PKNOX1	7.56678	7.12763	2.3974	protein_coding	Up
ENSBTAG00000014156	AMN1	6.1586	6.44324	-1.50452	protein_coding	Down
ENSBTAG00000014166	POLR1B	8.88524	8.61133	1.50661	protein_coding	Up
ENSBTAG00000014178	RALGAPA2	5.84579	5.54243	1.66534	protein_coding	Up
ENSBTAG00000014215	CCDC86	8.62281	8.22271	2.1869	protein_coding	Up
ENSBTAG00000014230	VRK1	5.82787	6.1665	-1.7956	protein_coding	Down
ENSBTAG00000014313	PYROXD2	6.67318	7.00015	-1.73272	protein_coding	Down
ENSBTAG00000014328	MGC138914	7.95775	8.38786	-2.28876	protein_coding	Down
ENSBTAG00000014355	MYCBPAP	5.45612	5.05602	2.1869	protein_coding	Up
ENSBTAG00000014381	CRHR2	6.33978	6.67678	-1.78679	protein_coding	Down
ENSBTAG00000014389	SP4	6.17716	5.85594	1.76164	protein_coding	Up
ENSBTAG00000014407	INO80D	5.26294	4.92208	1.8675	protein_coding	Up
ENSBTAG00000014465	SERPINE1	5.8011	5.44501	1.94967	protein_coding	Up
ENSBTAG00000014506	ZNF503	8.28907	8.01239	1.52151	protein_coding	Up
ENSBTAG00000014534	EEF1A1	14.4324	14.0672	1.99879	protein_coding	Up
ENSBTAG00000014549	GNL3	9.84584	9.51076	1.83634	protein_coding	Up
ENSBTAG00000014558	DDX21	8.70438	8.32732	2.06265	protein_coding	Up
ENSBTAG00000014564	XXYLT1	7.03202	7.51358	-2.56612	protein_coding	Down
ENSBTAG00000014599	LRRC66	5.85134	6.33925	-2.60036	protein_coding	Down
ENSBTAG00000014605	ETV6	7.23799	7.59704	-1.90567	protein_coding	Down
ENSBTAG00000014611	SORL1	6.84285	7.26531	-2.2475	protein_coding	Down
ENSBTAG00000014665	ADAMTS2	7.0792	7.37984	-1.5908	protein_coding	Down
ENSBTAG00000014707	ISG15	5.47872	5.93658	-2.43835	protein_coding	Down
ENSBTAG00000014721	MUC4	5.7708	6.14214	-1.97192	protein_coding	Down
ENSBTAG00000014733	NOP2	8.1997	7.81513	2.10317	protein_coding	Up
ENSBTAG00000014765		4.07015	4.39041	-1.69654	protein_coding	Down
ENSBTAG00000014773	HMMR	6.22827	6.64149	-2.1977	protein_coding	Down
ENSBTAG00000014791	CTH	6.16594	5.79951	2.00538	protein_coding	Up
ENSBTAG00000014831	PPP1R3C	9.51088	10.4326	-4.93877	protein_coding	Down
ENSBTAG00000014855	MICAL2	8.05322	6.99733	5.72219	protein_coding	Up
ENSBTAG00000014862		7.64123	9.06672	-7.65486	protein_coding	Down
ENSBTAG00000014881	PHF23	8.24671	7.89188	1.94282	protein_coding	Up
ENSBTAG00000014886	MEX3C	8.02496	7.71279	1.71289	protein_coding	Up
ENSBTAG00000014912	FMOD	6.0209	6.35159	-1.75279	protein_coding	Down
ENSBTAG00000014915	ETV5	6.48668	6.82605	-1.79959	protein_coding	Down
ENSBTAG00000014918	IBA57	7.37744	7.72943	-1.86763	protein_coding	Down
ENSBTAG00000014932	ARSL	5.1684	5.4954	-1.73289	protein_coding	Down
ENSBTAG00000014972	PTGER4	6.69934	6.36078	1.8551	protein_coding	Up
ENSBTAG00000015013	C2CD2L	7.26131	6.92744	1.82987	protein_coding	Up
ENSBTAG00000015016	CALCOCO1	10.1521	9.52739	3.398	protein_coding	Up
ENSBTAG00000015018	FSD2	10.7073	11.0103	-1.60346	protein_coding	Down
ENSBTAG00000015037	GAREM2	6.93771	6.54279	2.15894	protein_coding	Up
ENSBTAG00000015050	HCN2	6.79918	6.49116	1.6905	protein_coding	Up
ENSBTAG00000015051	POLRMT	7.80011	7.48902	1.70704	protein_coding	Up
ENSBTAG00000015060	GBP5	4.41821	5.07088	-3.48859	protein_coding	Down
ENSBTAG00000015066	LANCL1	10.2171	11.043	-4.42224	protein_coding	Down
ENSBTAG00000015077		8.29389	7.99783	1.62597	protein_coding	Up
ENSBTAG00000015080	PHACTR3	6.39599	6.91724	-2.78005	protein_coding	Down
ENSBTAG00000015089	LGALS1	10.5692	10.9238	-1.88122	protein_coding	Down
ENSBTAG00000015109	TOB2	10.9562	10.4189	2.92654	protein_coding	Up
ENSBTAG00000015127	SDC4	7.8152	7.02457	4.29221	protein_coding	Up
ENSBTAG00000015132	RXFP2	5.44596	5.73362	-1.5208	protein_coding	Down
ENSBTAG00000015200	L2HGDH	8.89248	9.1833	-1.53786	protein_coding	Down
ENSBTAG00000015220	AGO4	7.13192	6.72646	2.2158	protein_coding	Up
ENSBTAG00000015228	CD74	10.1061	10.7257	-3.31021	protein_coding	Down
ENSBTAG00000015303	MPP6	6.41198	5.86414	2.98338	protein_coding	Up
ENSBTAG00000015314	ASL	6.96344	6.68704	1.52	protein_coding	Up
ENSBTAG00000015316	NPM1	9.77558	9.45908	1.73619	protein_coding	Up
ENSBTAG00000015361	CNTFR	9.25744	8.64056	3.35554	protein_coding	Up
ENSBTAG00000015369	MLLT11	7.47884	8.1173	-3.41196	protein_coding	Down
ENSBTAG00000015371	GABPB2	6.50962	6.16046	1.91229	protein_coding	Up
ENSBTAG00000015402	GREB1	7.0543	5.95319	5.96596	protein_coding	Up
ENSBTAG00000015406	ZNF750	7.6744	7.21184	2.52362	protein_coding	Up
ENSBTAG00000015460	TP63	6.77828	6.47221	1.67998	protein_coding	Up
ENSBTAG00000015467	FAM184A	7.1784	6.82102	1.9566	protein_coding	Up
ENSBTAG00000015505	FADS2	7.53678	7.89654	-1.9095	protein_coding	Down
ENSBTAG00000015509	NAMPT	11.1305	10.1006	5.5821	protein_coding	Up
ENSBTAG00000015539	RAPGEF5	5.86821	6.27244	-2.14928	protein_coding	Down
ENSBTAG00000015582	HMOX1	6.78724	6.3448	2.41514	protein_coding	Up
ENSBTAG00000015604	ZNF385A	8.32286	8.74081	-2.22319	protein_coding	Down
ENSBTAG00000015609	PREX1	6.93911	6.50117	2.39088	protein_coding	Up
ENSBTAG00000015611	TBC1D9B	9.79484	10.0877	-1.54865	protein_coding	Down
ENSBTAG00000015655	APBB1	6.71156	6.35464	1.95407	protein_coding	Up
ENSBTAG00000015702	PITX3	7.66222	6.99257	3.64001	protein_coding	Up
ENSBTAG00000015704	TMCO3	9.83167	9.32561	2.75811	protein_coding	Up
ENSBTAG00000015730	BOLA-DMA	6.8201	7.33228	-2.73119	protein_coding	Down
ENSBTAG00000015739	MRC2	7.49331	7.93689	-2.36135	protein_coding	Down
ENSBTAG00000015750	AMN	5.0642	4.68775	2.05935	protein_coding	Up
ENSBTAG00000015764	EML2	6.88246	7.28653	-2.14838	protein_coding	Down
ENSBTAG00000015821	AMPD3	6.67936	6.05105	3.41717	protein_coding	Up
ENSBTAG00000015849	PNPLA4	5.71129	6.04568	-1.77271	protein_coding	Down
ENSBTAG00000015879	TULP3	7.3588	7.65767	-1.58123	protein_coding	Down
ENSBTAG00000015888	PDE7B	8.3858	7.93622	2.45366	protein_coding	Up
ENSBTAG00000015950	ISOC2	9.30806	9.72747	-2.23105	protein_coding	Down
ENSBTAG00000015996	GPC1	12.2462	12.6462	-2.12636	protein_coding	Down
ENSBTAG00000016007	ADH5	8.21686	8.51039	-1.55249	protein_coding	Down
ENSBTAG00000016013	ASB14	7.03907	7.40505	-1.94303	protein_coding	Down
ENSBTAG00000016033	HOXD9	9.23676	8.6923	2.96511	protein_coding	Up
ENSBTAG00000016060	CREM	7.33921	6.87301	2.54327	protein_coding	Up
ENSBTAG00000016061	RSAD2	6.32825	6.6527	-1.71915	protein_coding	Down
ENSBTAG00000016078	STXBP4	5.64226	5.94071	-1.57894	protein_coding	Down
ENSBTAG00000016096	SYP	4.84025	5.13771	-1.57364	protein_coding	Down
ENSBTAG00000016103	CBFB	8.86094	8.48438	2.05999	protein_coding	Up
ENSBTAG00000016137	ZNF608	7.29094	7.63986	-1.85105	protein_coding	Down
ENSBTAG00000016142	CYB5R2	5.95123	6.27194	-1.699	protein_coding	Down
ENSBTAG00000016144	LCN10	4.38084	4.74215	-1.9179	protein_coding	Down
ENSBTAG00000016169	ID1	8.47523	7.9286	2.97684	protein_coding	Up
ENSBTAG00000016177	FGL1	7.6561	7.13575	2.83512	protein_coding	Up
ENSBTAG00000016194	FBXO32	7.4919	7.15683	1.83631	protein_coding	Up
ENSBTAG00000016206	MAOA	6.14415	5.77564	2.01659	protein_coding	Up
ENSBTAG00000016220	WIPF3	7.25813	6.95975	1.63854	protein_coding	Up
ENSBTAG00000016254	HDAC5	9.79569	9.49703	1.64	protein_coding	Up
ENSBTAG00000016357	VNN2	6.91026	6.2162	3.77157	protein_coding	Up
ENSBTAG00000016377	IPP	8.21324	8.65978	-2.37735	protein_coding	Down
ENSBTAG00000016401	OPTN	11.2753	11.7025	-2.27283	protein_coding	Down
ENSBTAG00000016413	DUSP26	10.854	10.5014	1.93071	protein_coding	Up
ENSBTAG00000016414	VDR	4.65746	5.02278	-1.93944	protein_coding	Down
ENSBTAG00000016424	MMP25	4.78677	5.18617	-2.12319	protein_coding	Down
ENSBTAG00000016429	TMEM205	7.93168	8.33774	-2.15914	protein_coding	Down
ENSBTAG00000016450	CDNF	9.90388	10.2775	-1.98399	protein_coding	Down
ENSBTAG00000016465	DHCR7	6.98211	7.31689	-1.77481	protein_coding	Down
ENSBTAG00000016467	SLC22A17	6.1707	6.51347	-1.81793	protein_coding	Down
ENSBTAG00000016494	RELT	6.3965	6.96666	-3.04376	protein_coding	Down
ENSBTAG00000016504	AGAP1	7.4607	7.09315	2.01141	protein_coding	Up
ENSBTAG00000016513	ZNF331	5.70611	5.42566	1.54181	protein_coding	Up
ENSBTAG00000016523	DNAH10	4.65098	4.95521	-1.61012	protein_coding	Down
ENSBTAG00000016549	CARMIL1	5.7476	6.10535	-1.89869	protein_coding	Down
ENSBTAG00000016629	ADCY9	8.53807	8.25291	1.56725	protein_coding	Up
ENSBTAG00000016643	CYB561D1	6.69511	7.02922	-1.77125	protein_coding	Down
ENSBTAG00000016656	PARP14	6.39095	6.80109	-2.18111	protein_coding	Down
ENSBTAG00000016661	USP18	5.13036	5.44732	-1.67879	protein_coding	Down
ENSBTAG00000016676	PTER	8.21394	8.60598	-2.08355	protein_coding	Down
ENSBTAG00000016683	NFKBIA	8.88198	8.5721	1.70052	protein_coding	Up
ENSBTAG00000016738	DTX1	6.41998	6.13205	1.58219	protein_coding	Up
ENSBTAG00000016768	SCN3B	6.85104	5.93857	4.94902	protein_coding	Up
ENSBTAG00000016791	PEX7	7.88221	8.22248	-1.80446	protein_coding	Down
ENSBTAG00000016801	RXRG	7.91449	8.20522	-1.53737	protein_coding	Down
ENSBTAG00000016873	OSER1	9.05607	8.65335	2.20102	protein_coding	Up
ENSBTAG00000016886	MT3	5.28174	5.75251	-2.50795	protein_coding	Down
ENSBTAG00000016908	METTL1	7.19282	6.81458	2.06902	protein_coding	Up
ENSBTAG00000016952	PSMD5	8.6093	8.28968	1.75299	protein_coding	Up
ENSBTAG00000017021	MCM4	6.79856	6.5066	1.6039	protein_coding	Up
ENSBTAG00000017024	PPARGC1A	8.48289	8.98759	-2.69087	protein_coding	Down
ENSBTAG00000017032	FREM2	5.49316	6.03301	-2.88035	protein_coding	Down
ENSBTAG00000017071	C1QTNF3	6.78864	7.63352	-4.52475	protein_coding	Down
ENSBTAG00000017082	POR	8.3106	8.03345	1.52407	protein_coding	Up
ENSBTAG00000017118	FAM8A1	9.57615	9.26793	1.69155	protein_coding	Up
ENSBTAG00000017135	CTSS	6.88087	7.30496	-2.25632	protein_coding	Down
ENSBTAG00000017155	TRIM32	6.56327	6.91535	-1.86812	protein_coding	Down
ENSBTAG00000017188	ISM1	6.16599	5.84399	1.76585	protein_coding	Up
ENSBTAG00000017189	POLE4	8.20847	8.51549	-1.62518	protein_coding	Down
ENSBTAG00000017219	DDX51	7.5238	7.18825	1.83893	protein_coding	Up
ENSBTAG00000017223	MEST	7.00173	7.69199	-3.69123	protein_coding	Down
ENSBTAG00000017273	LRRC25	4.82454	4.53434	1.59443	protein_coding	Up
ENSBTAG00000017296	POLN	5.06259	4.78673	1.51711	protein_coding	Up
ENSBTAG00000017328	PTI	5.67947	6.0549	-1.99399	protein_coding	Down
ENSBTAG00000017338	FAM205C	5.08223	4.77392	1.69207	protein_coding	Up
ENSBTAG00000017346	RASSF2	4.57648	4.86525	-1.52676	protein_coding	Down
ENSBTAG00000017373	LACTB	8.2006	8.57665	-1.99735	protein_coding	Down
ENSBTAG00000017418	RRP1B	8.1314	7.84245	1.58768	protein_coding	Up
ENSBTAG00000017452	RCAN3	5.39429	5.74211	-1.84511	protein_coding	Down
ENSBTAG00000017457	STK10	7.19081	6.7894	2.19393	protein_coding	Up
ENSBTAG00000017460	PRORSD1	7.08725	6.71895	2.01544	protein_coding	Up
ENSBTAG00000017468	NUCB2	6.18714	6.51459	-1.73531	protein_coding	Down
ENSBTAG00000017492	PCMTD1	10.8042	10.5154	1.58671	protein_coding	Up
ENSBTAG00000017512	MAPT	8.377	8.70916	-1.76071	protein_coding	Down
ENSBTAG00000017524	CBLN4	8.86518	9.16112	-1.56547	protein_coding	Down
ENSBTAG00000017537	PTGIS	7.61145	7.17875	2.36263	protein_coding	Up
ENSBTAG00000017554	RTN4IP1	9.12677	9.42763	-1.59199	protein_coding	Down
ENSBTAG00000017592	GPAT3	8.16733	7.48769	3.69387	protein_coding	Up
ENSBTAG00000017639	RPS6KA3	9.67283	9.16147	2.78672	protein_coding	Up
ENSBTAG00000017661	RFX2	6.06151	5.58391	2.6047	protein_coding	Up
ENSBTAG00000017666	ABCC5	8.75495	9.09725	-1.81538	protein_coding	Down
ENSBTAG00000017670		5.86412	6.56889	-3.76946	protein_coding	Down
ENSBTAG00000017681	RIN1	7.85453	8.18293	-1.74041	protein_coding	Down
ENSBTAG00000017709	ATRNL1	5.51622	5.22768	1.58546	protein_coding	Up
ENSBTAG00000017764	HDAC4	7.44944	7.1765	1.50141	protein_coding	Up
ENSBTAG00000017810	EFHC1	4.77601	5.13602	-1.91087	protein_coding	Down
ENSBTAG00000017812	ALS2CL	8.69881	8.41786	1.54453	protein_coding	Up
ENSBTAG00000017819	PMVK	6.2739	6.58059	-1.62339	protein_coding	Down
ENSBTAG00000017860	HIPK2	6.41805	6.13927	1.53285	protein_coding	Up
ENSBTAG00000017867	YPEL1	5.78635	5.46856	1.74316	protein_coding	Up
ENSBTAG00000017879	C9H6orf163	6.15074	6.43983	-1.52854	protein_coding	Down
ENSBTAG00000017883	LRRC38	4.85375	5.15199	-1.5778	protein_coding	Down
ENSBTAG00000017956	KCTD15	9.052	9.52624	-2.52666	protein_coding	Down
ENSBTAG00000017964	LRRC51	6.03756	6.32399	-1.51416	protein_coding	Down
ENSBTAG00000017976	ABL1	8.90873	8.61953	1.58901	protein_coding	Up
ENSBTAG00000017994	MAX	9.73597	9.23742	2.71759	protein_coding	Up
ENSBTAG00000018045	SLC12A4	7.94343	7.60947	1.83031	protein_coding	Up
ENSBTAG00000018064	FAM221A	4.75175	4.47655	1.51355	protein_coding	Up
ENSBTAG00000018082	QPRT	5.06691	5.35248	-1.50951	protein_coding	Down
ENSBTAG00000018125	KIF5C	4.81914	5.153	-1.76987	protein_coding	Down
ENSBTAG00000018164	FNDC4	5.76937	5.41993	1.91372	protein_coding	Up
ENSBTAG00000018165	RIPOR2	7.12671	7.44128	-1.66587	protein_coding	Down
ENSBTAG00000018169	ITGB4	6.67214	6.95755	-1.50872	protein_coding	Down
ENSBTAG00000018186	PDXK	9.93261	9.53621	2.16695	protein_coding	Up
ENSBTAG00000018192	ALG8	5.49004	5.84416	-1.87908	protein_coding	Down
ENSBTAG00000018201	TKFC	6.94674	7.23567	-1.5277	protein_coding	Down
ENSBTAG00000018204	MYH1	17.9735	17.2015	4.19182	protein_coding	Up
ENSBTAG00000018214	SHISA2	9.97939	10.3147	-1.77751	protein_coding	Down
ENSBTAG00000018247	OCRL	8.54744	8.21562	1.81878	protein_coding	Up
ENSBTAG00000018249	KCNN3	7.53512	7.20926	1.78664	protein_coding	Up
ENSBTAG00000018257	APIP	8.61176	8.27986	1.81924	protein_coding	Up
ENSBTAG00000018352	ABRA	8.38217	8.041	1.86919	protein_coding	Up
ENSBTAG00000018364	TMEM132A	7.55963	7.85589	-1.56717	protein_coding	Down
ENSBTAG00000018381	CRLF3	7.96682	7.63747	1.8055	protein_coding	Up
ENSBTAG00000018399	MYH15	5.07735	5.52535	-2.38517	protein_coding	Down
ENSBTAG00000018413	TENT5B	6.21463	5.81839	2.16607	protein_coding	Up
ENSBTAG00000018452	ANKRA2	7.4463	7.17355	1.50032	protein_coding	Up
ENSBTAG00000018474	IL6R	8.33467	7.99815	1.84412	protein_coding	Up
ENSBTAG00000018520	SCN1A	5.69388	6.03563	-1.81237	protein_coding	Down
ENSBTAG00000018546	LRBA	7.43701	7.72095	-1.50073	protein_coding	Down
ENSBTAG00000018577	SLC7A1	6.79926	7.18477	-2.04833	protein_coding	Down
ENSBTAG00000018725	FBLIM1	9.41635	9.09707	1.75115	protein_coding	Up
ENSBTAG00000018775	TPX2	6.5167	6.80462	-1.52225	protein_coding	Down
ENSBTAG00000018790	BVES	9.64368	10.0093	-1.94105	protein_coding	Down
ENSBTAG00000018806	PSRC1	5.28056	5.61507	-1.7734	protein_coding	Down
ENSBTAG00000018807	MYBPHL	5.36893	5.69	-1.70091	protein_coding	Down
ENSBTAG00000018812	NOP56	9.69278	9.41409	1.53238	protein_coding	Up
ENSBTAG00000018838	IQCA1L	6.04331	6.6904	-3.45849	protein_coding	Down
ENSBTAG00000018841	PTPN3	6.84883	6.47926	2.02231	protein_coding	Up
ENSBTAG00000018937	HMOX2	8.91276	8.50717	2.21646	protein_coding	Up
ENSBTAG00000018942	SSX2IP	6.33025	6.70922	-2.01303	protein_coding	Down
ENSBTAG00000018948	HIF3A	6.85451	6.3253	2.88294	protein_coding	Up
ENSBTAG00000018966	PLCE1	7.52387	7.86614	-1.81517	protein_coding	Down
ENSBTAG00000018970	XPO5	7.18187	6.8957	1.57267	protein_coding	Up
ENSBTAG00000019002	SLC2A12	6.43786	6.9017	-2.47058	protein_coding	Down
ENSBTAG00000019018		4.3733	5.24043	-4.64473	protein_coding	Down
ENSBTAG00000019026	EXTL2	6.35669	6.74943	-2.08729	protein_coding	Down
ENSBTAG00000019044	BAIAP2	7.60198	7.2963	1.67784	protein_coding	Up
ENSBTAG00000019054	EPSTI1	5.97534	6.29156	-1.6748	protein_coding	Down
ENSBTAG00000019067	TMC8	5.35548	5.05531	1.64816	protein_coding	Up
ENSBTAG00000019076	PAK6	5.43785	5.07316	1.99601	protein_coding	Up
ENSBTAG00000019093	AMY2B	9.38977	9.05533	1.83293	protein_coding	Up
ENSBTAG00000019138	KIF3C	7.08569	7.44308	-1.89674	protein_coding	Down
ENSBTAG00000019166	NSMCE4A	7.81197	8.16191	-1.85659	protein_coding	Down
ENSBTAG00000019175	SOBP	7.35937	7.69591	-1.78431	protein_coding	Down
ENSBTAG00000019182	TIA1	6.78277	7.10647	-1.71509	protein_coding	Down
ENSBTAG00000019225	SLC39A14	7.95428	7.64042	1.72194	protein_coding	Up
ENSBTAG00000019237	TXNDC5	8.25562	7.97478	1.54399	protein_coding	Up
ENSBTAG00000019289	ITGA2	4.82114	5.10939	-1.524	protein_coding	Down
ENSBTAG00000019291	GRB14	5.61866	6.04502	-2.26853	protein_coding	Down
ENSBTAG00000019298	STRADB	8.87161	8.45261	2.28876	protein_coding	Up
ENSBTAG00000019300	TPMT	7.97114	8.33637	-1.93897	protein_coding	Down
ENSBTAG00000019310	FOXK1	6.35454	6.06489	1.59148	protein_coding	Up
ENSBTAG00000019321	CCDC57	5.99248	6.30453	-1.65231	protein_coding	Down
ENSBTAG00000019322	HABP2	9.18974	8.77556	2.26281	protein_coding	Up
ENSBTAG00000019327	NRAP	14.0207	13.6344	2.11243	protein_coding	Up
ENSBTAG00000019347	PLXDC1	6.51451	7.0162	-2.67467	protein_coding	Down
ENSBTAG00000019354	PAX8	4.64236	4.34832	1.61513	protein_coding	Up
ENSBTAG00000019386	BOLA-NC1	7.22118	7.62615	-2.15322	protein_coding	Down
ENSBTAG00000019406	IGF2BP3	5.73142	5.44586	1.56942	protein_coding	Up
ENSBTAG00000019409	GNPTAB	7.96343	7.63325	1.80991	protein_coding	Up
ENSBTAG00000019445	C4H7orf31	5.10098	4.72896	2.0355	protein_coding	Up
ENSBTAG00000019494	RPL10A	13.1353	12.8581	1.52431	protein_coding	Up
ENSBTAG00000019517	ELN	10.1178	9.72307	2.1578	protein_coding	Up
ENSBTAG00000019569	CD151	10.0252	9.74054	1.56431	protein_coding	Up
ENSBTAG00000019574	MAPK12	10.5922	10.1859	2.22032	protein_coding	Up
ENSBTAG00000019588	BLA-DQB	7.19323	7.92827	-3.93263	protein_coding	Down
ENSBTAG00000019592	MBD5	6.75419	7.08342	-1.74492	protein_coding	Down
ENSBTAG00000019605	OPA3	5.9195	6.26289	-1.82124	protein_coding	Down
ENSBTAG00000019625	EHHADH	7.62447	8.20732	-3.11219	protein_coding	Down
ENSBTAG00000019627	THY1	6.97964	7.27878	-1.5827	protein_coding	Down
ENSBTAG00000019633	SHROOM3	6.31428	6.63654	-1.70733	protein_coding	Down
ENSBTAG00000019648	RACK1	13.7994	13.3918	2.22741	protein_coding	Up
ENSBTAG00000019694	ADAM23	4.93782	4.5279	2.23981	protein_coding	Up
ENSBTAG00000019777	CDCA3	5.8594	6.21135	-1.86742	protein_coding	Down
ENSBTAG00000019801		5.58452	5.26572	1.7486	protein_coding	Up
ENSBTAG00000019807	COL27A1	6.09539	6.5824	-2.59551	protein_coding	Down
ENSBTAG00000019822	TPPP3	8.29118	8.71974	-2.28039	protein_coding	Down
ENSBTAG00000019859	B3GALT2	6.35227	6.7417	-2.06946	protein_coding	Down
ENSBTAG00000019881		5.96944	5.46388	2.75537	protein_coding	Up
ENSBTAG00000019960	TM4SF18	5.74294	6.04994	-1.62507	protein_coding	Down
ENSBTAG00000019986	CSNK1D	10.1553	9.86874	1.57498	protein_coding	Up
ENSBTAG00000020035	RCAN1	10.8535	10.0085	4.58534	protein_coding	Up
ENSBTAG00000020037	CYB5RL	6.54479	6.87881	-1.77078	protein_coding	Down
ENSBTAG00000020050	MLEC	8.02458	8.3788	-1.87967	protein_coding	Down
ENSBTAG00000020087	CAMK2A	11.8847	12.1974	-1.65575	protein_coding	Down
ENSBTAG00000020090	EPHX3	5.52684	5.8424	-1.67124	protein_coding	Down
ENSBTAG00000020100		5.86544	6.42948	-3.01079	protein_coding	Down
ENSBTAG00000020212	WDR41	7.46361	7.80956	-1.83504	protein_coding	Down
ENSBTAG00000020213	NIPAL4	5.0787	4.79398	1.56486	protein_coding	Up
ENSBTAG00000020219	MSS51	8.36309	8.73733	-1.98756	protein_coding	Down
ENSBTAG00000020262	PSME4	10.693	10.3978	1.62141	protein_coding	Up
ENSBTAG00000020330	BTG1	9.4805	9.1035	2.06231	protein_coding	Up
ENSBTAG00000020331	COQ6	8.23138	8.56689	-1.77881	protein_coding	Down
ENSBTAG00000020344	SLC44A3	5.9345	6.265	-1.75173	protein_coding	Down
ENSBTAG00000020355	KLF4	7.6966	7.31281	2.09895	protein_coding	Up
ENSBTAG00000020359	PLEKHM1	8.00916	7.73285	1.51955	protein_coding	Up
ENSBTAG00000020407	MTSS1	8.49252	8.89247	-2.12617	protein_coding	Down
ENSBTAG00000020417	DAPK3	9.41338	8.99837	2.26725	protein_coding	Up
ENSBTAG00000020446	THOP1	9.71624	9.39326	1.77113	protein_coding	Up
ENSBTAG00000020481	GXYLT2	4.77947	5.11178	-1.76157	protein_coding	Down
ENSBTAG00000020505	SBNO1	7.69319	7.35455	1.85555	protein_coding	Up
ENSBTAG00000020528	PCOLCE	8.68863	8.98713	-1.57928	protein_coding	Down
ENSBTAG00000020536	HERC6	5.99815	6.44065	-2.35558	protein_coding	Down
ENSBTAG00000020566	BCR	6.89091	6.59647	1.6173	protein_coding	Up
ENSBTAG00000020590	FZD2	6.70809	6.99404	-1.51159	protein_coding	Down
ENSBTAG00000020602	IDO1	4.81811	6.27974	-7.84966	protein_coding	Down
ENSBTAG00000020605	SMTNL2	11.6581	11.1831	2.59051	protein_coding	Up
ENSBTAG00000020632	NQO1	8.19712	8.7868	-3.149	protein_coding	Down
ENSBTAG00000020643	BARX2	5.88411	6.23756	-1.8755	protein_coding	Down
ENSBTAG00000020649	CIITA	6.26062	6.77224	-2.72819	protein_coding	Down
ENSBTAG00000020658	LNX1	6.06605	5.62319	2.4174	protein_coding	Up
ENSBTAG00000020661	ABCA1	7.11824	6.543	3.13103	protein_coding	Up
ENSBTAG00000020735	SMG1	9.05077	8.72741	1.77317	protein_coding	Up
ENSBTAG00000020755	SELP	5.80438	5.49651	1.68964	protein_coding	Up
ENSBTAG00000020756	GSK3A	9.54044	9.23921	1.65388	protein_coding	Up
ENSBTAG00000020961	DUSP19	6.69561	6.98173	-1.51251	protein_coding	Down
ENSBTAG00000021000	USF3	7.75676	7.47445	1.55187	protein_coding	Up
ENSBTAG00000021018	KHSRP	9.89369	9.60153	1.60498	protein_coding	Up
ENSBTAG00000021048	ADM	7.47755	7.18228	1.62173	protein_coding	Up
ENSBTAG00000021102	GALM	6.40372	6.73948	-1.78012	protein_coding	Down
ENSBTAG00000021120	SMYD1	10.2635	10.6165	-1.87294	protein_coding	Down
ENSBTAG00000021141	CD8A	4.96711	5.37795	-2.18487	protein_coding	Down
ENSBTAG00000021151	MYH10	8.13156	7.71827	2.25795	protein_coding	Up
ENSBTAG00000021168	SIRT4	6.42404	6.72378	-1.58593	protein_coding	Down
ENSBTAG00000021176	CRISPLD2	8.2534	7.95335	1.64749	protein_coding	Up
ENSBTAG00000021211	DPT	7.06099	7.65683	-3.18223	protein_coding	Down
ENSBTAG00000021223	CRY2	8.64246	8.99238	-1.85648	protein_coding	Down
ENSBTAG00000021226	SAR1B	10.3453	10.0416	1.66735	protein_coding	Up
ENSBTAG00000021272	ABCG1	4.91085	4.60881	1.65827	protein_coding	Up
ENSBTAG00000021287	SLC16A7	7.22706	6.76946	2.49686	protein_coding	Up
ENSBTAG00000021298	METTL11B	7.39615	8.23386	-4.48613	protein_coding	Down
ENSBTAG00000021306	CHRDL2	6.39184	5.74302	3.52774	protein_coding	Up
ENSBTAG00000021313	RUNDC3B	4.75851	4.46017	1.63827	protein_coding	Up
ENSBTAG00000021316	COL4A3	5.89248	6.18577	-1.55113	protein_coding	Down
ENSBTAG00000021377	S100A14	7.69404	8.0421	-1.84644	protein_coding	Down
ENSBTAG00000021396	HEG1	7.24244	6.89617	1.89671	protein_coding	Up
ENSBTAG00000021421	SSR4	10.9609	10.6413	1.75282	protein_coding	Up
ENSBTAG00000021433		5.82595	6.14194	-1.67352	protein_coding	Down
ENSBTAG00000021435	MAFF	8.11694	7.63466	2.62992	protein_coding	Up
ENSBTAG00000021442	CRTAP	7.61369	8.01122	-2.11313	protein_coding	Down
ENSBTAG00000021447	SIM2	5.98891	5.6667	1.767	protein_coding	Up
ENSBTAG00000021466	COL3A1	11.7279	12.1373	-2.17707	protein_coding	Down
ENSBTAG00000021497	CDH23	6.14082	6.49713	-1.89092	protein_coding	Down
ENSBTAG00000021516	GSTA1	5.86918	7.23902	-7.35484	protein_coding	Down
ENSBTAG00000021531	PGPEP1L	5.41294	5.11452	1.63875	protein_coding	Up
ENSBTAG00000021557	FUT2	4.54852	4.85112	-1.60132	protein_coding	Down
ENSBTAG00000021565	PRSS2	5.45677	5.80064	-1.82381	protein_coding	Down
ENSBTAG00000021581	FHOD3	10.251	10.8219	-3.04765	protein_coding	Down
ENSBTAG00000021595	HIP1R	7.63237	7.3556	1.52201	protein_coding	Up
ENSBTAG00000021658	TAMALIN	6.85201	6.42766	2.31763	protein_coding	Up
ENSBTAG00000021713	MAMLD1	6.03341	6.32505	-1.54223	protein_coding	Down
ENSBTAG00000021777	DOC2G	7.82583	8.23309	-2.16557	protein_coding	Down
ENSBTAG00000021790	APOOL	8.48948	8.90237	-2.19594	protein_coding	Down
ENSBTAG00000021808	CACNB3	7.11048	7.39869	-1.52375	protein_coding	Down
ENSBTAG00000021819	IFNAR1	7.31431	7.01459	1.64569	protein_coding	Up
ENSBTAG00000021829	GM2A	5.27843	5.59209	-1.66098	protein_coding	Down
ENSBTAG00000021841	CHD7	8.07395	7.61322	2.51375	protein_coding	Up
ENSBTAG00000021912	DUSP7	8.87973	8.54476	1.8358	protein_coding	Up
ENSBTAG00000021928	DIPK1B	5.51529	5.17984	1.8384	protein_coding	Up
ENSBTAG00000021941	DPP6	4.96775	4.6659	1.65721	protein_coding	Up
ENSBTAG00000021960	GPX8	8.16756	8.54059	-1.98103	protein_coding	Down
ENSBTAG00000021969	KLHL29	7.88395	7.60111	1.55478	protein_coding	Up
ENSBTAG00000021980	RASSF8	7.82754	7.21364	3.33948	protein_coding	Up
ENSBTAG00000021992	CAVIN4	11.9483	12.2909	-1.81667	protein_coding	Down
ENSBTAG00000021999	CPT1A	8.23194	7.65494	3.14055	protein_coding	Up
ENSBTAG00000022058	ACACB	12.2346	11.4923	4.03135	protein_coding	Up
ENSBTAG00000022294	FADS1	7.04883	7.49439	-2.37204	protein_coding	Down
ENSBTAG00000022489		6.71811	7.23362	-2.74914	protein_coding	Down
ENSBTAG00000022890	MBP	8.91382	8.57975	1.83091	protein_coding	Up
ENSBTAG00000022986	TAFA5	5.03288	4.73726	1.62359	protein_coding	Up
ENSBTAG00000022991	NBEA	7.11108	7.42155	-1.64382	protein_coding	Down
ENSBTAG00000023377	SH3BP5	10.6123	10.1974	2.26653	protein_coding	Up
ENSBTAG00000023384	CBR1	6.21529	6.5167	-1.59493	protein_coding	Down
ENSBTAG00000023429	PLS1	5.24377	5.56578	-1.70595	protein_coding	Down
ENSBTAG00000023601	POLR1G	7.35337	7.0244	1.80343	protein_coding	Up
ENSBTAG00000023614	NUDT19	7.39796	6.93972	2.50032	protein_coding	Up
ENSBTAG00000023929	FOSL2	8.8613	8.20017	3.59405	protein_coding	Up
ENSBTAG00000023970		6.14856	5.66283	2.64851	protein_coding	Up
ENSBTAG00000024000	ATOH8	7.69923	7.01393	3.72442	protein_coding	Up
ENSBTAG00000024081	ECM2	7.42189	7.94096	-2.7683	protein_coding	Down
ENSBTAG00000024272		4.67106	5.06937	-2.11731	protein_coding	Down
ENSBTAG00000024490		5.45545	4.86496	3.21329	protein_coding	Up
ENSBTAG00000024493	DHRS3	8.06923	7.76286	1.68161	protein_coding	Up
ENSBTAG00000024509	TMEM52	9.49662	9.95468	-2.43941	protein_coding	Down
ENSBTAG00000024603	NCOR2	10.4912	10.2016	1.59099	protein_coding	Up
ENSBTAG00000024751	ULBP17	5.42826	5.07669	1.92528	protein_coding	Up
ENSBTAG00000024826	TECRL	7.5123	8.15139	-3.41532	protein_coding	Down
ENSBTAG00000024929	PPP1R27	11.7485	11.3766	2.03481	protein_coding	Up
ENSBTAG00000025136	MYOZ3	11.0395	11.5602	-2.77706	protein_coding	Down
ENSBTAG00000025161	AGPAT2	8.8791	8.54354	1.83896	protein_coding	Up
ENSBTAG00000025219		5.34276	5.63626	-1.55228	protein_coding	Down
ENSBTAG00000025258		5.66687	5.25164	2.26847	protein_coding	Up
ENSBTAG00000025329	IRF2BPL	9.61982	9.31643	1.66553	protein_coding	Up
ENSBTAG00000025441	HSPA1A	12.8538	12.4102	2.42183	protein_coding	Up
ENSBTAG00000025450	SYNE2	9.98218	10.3495	-1.95025	protein_coding	Down
ENSBTAG00000025462	GADD45B	7.00005	6.68173	1.746	protein_coding	Up
ENSBTAG00000025496	SORD	7.00137	7.44553	-2.36449	protein_coding	Down
ENSBTAG00000025644	CALM1	12.8699	12.4469	2.30992	protein_coding	Up
ENSBTAG00000025762	CNP	8.72921	9.1624	-2.30533	protein_coding	Down
ENSBTAG00000025778	EMC9	9.47807	9.76755	-1.53063	protein_coding	Down
ENSBTAG00000025809	ABHD8	8.36738	8.66765	-1.5888	protein_coding	Down
ENSBTAG00000026344	MAFA	10.3567	9.97545	2.08526	protein_coding	Up
ENSBTAG00000026437		4.80176	4.5059	1.62492	protein_coding	Up
ENSBTAG00000026637		6.10795	6.39702	-1.52841	protein_coding	Down
ENSBTAG00000026796		6.45769	5.85315	3.28896	protein_coding	Up
ENSBTAG00000026963	NCALD	7.2322	7.59196	-1.90947	protein_coding	Down
ENSBTAG00000026972	MYF5	6.01253	6.32411	-1.64974	protein_coding	Down
ENSBTAG00000027064	BTBD11	6.01259	5.63707	2.05438	protein_coding	Up
ENSBTAG00000027425	CCDC190	6.64967	7.12674	-2.54187	protein_coding	Down
ENSBTAG00000027525		7.14135	6.80843	1.82467	protein_coding	Up
ENSBTAG00000027629		13.1662	13.6623	-2.64452	protein_coding	Down
ENSBTAG00000027654	EIF4EBP1	10.2758	9.79208	2.63783	protein_coding	Up
ENSBTAG00000027867		5.26966	5.63031	-1.91431	protein_coding	Down
ENSBTAG00000027875	CCDC141	6.10091	6.54101	-2.34259	protein_coding	Down
ENSBTAG00000027962		7.77329	8.13837	-1.9382	protein_coding	Down
ENSBTAG00000029237	5S_rRNA	5.70145	5.36515	1.84291	rRNA	Up
ENSBTAG00000030208	ERFE	5.66523	5.18078	2.64162	protein_coding	Up
ENSBTAG00000030258	CDC42EP1	8.97701	8.69405	1.55533	protein_coding	Up
ENSBTAG00000030424	CLEC1A	7.06546	6.75367	1.7108	protein_coding	Up
ENSBTAG00000030499		9.59386	8.8064	4.27511	protein_coding	Up
ENSBTAG00000030599	SMOC1	6.62342	6.24433	2.07362	protein_coding	Up
ENSBTAG00000030667	CCDC114	5.87784	6.24026	-1.92381	protein_coding	Down
ENSBTAG00000030686	RAVER2	6.62448	7.13536	-2.72419	protein_coding	Down
ENSBTAG00000030775	PCBP3	5.30421	4.98928	1.72774	protein_coding	Up
ENSBTAG00000030784	APPL2	9.67417	9.33588	1.85364	protein_coding	Up
ENSBTAG00000030898	MS4A13	4.29377	4.66819	-1.98854	protein_coding	Down
ENSBTAG00000030913	MX1	6.5504	7.09739	-2.91882	protein_coding	Down
ENSBTAG00000030932	IFI44L	5.29289	5.75559	-2.46443	protein_coding	Down
ENSBTAG00000030965	MCM7	8.90366	8.62825	1.51465	protein_coding	Up
ENSBTAG00000030990	UQCC1	9.33532	9.69276	-1.89698	protein_coding	Down
ENSBTAG00000031059	LRRC61	7.06276	6.78573	1.52339	protein_coding	Up
ENSBTAG00000031106	ZNF746	7.81115	7.4002	2.24538	protein_coding	Up
ENSBTAG00000031134	YWHAH	11.1987	10.8676	1.81465	protein_coding	Up
ENSBTAG00000031178	SLC9A9	5.77438	6.18502	-2.18379	protein_coding	Down
ENSBTAG00000031184	CDKN1C	8.35825	8.0637	1.61784	protein_coding	Up
ENSBTAG00000031209	SLC22A4	5.6778	5.28882	2.12696	protein_coding	Up
ENSBTAG00000031231	IRF1	7.1053	7.61913	-2.7401	protein_coding	Down
ENSBTAG00000031433	TEX9	5.30397	5.60629	-1.59985	protein_coding	Down
ENSBTAG00000031461	SNX7	7.05832	7.3594	-1.59319	protein_coding	Down
ENSBTAG00000031548		7.89629	7.59744	1.64105	protein_coding	Up
ENSBTAG00000031573	NMRK2	13.9788	14.3997	-2.23954	protein_coding	Down
ENSBTAG00000031750	PLAC8B	4.92065	5.35358	-2.30396	protein_coding	Down
ENSBTAG00000031837	IMPDH2	9.8968	9.4215	2.59227	protein_coding	Up
ENSBTAG00000031919	SLC35E3	6.94801	7.34367	-2.10301	protein_coding	Down
ENSBTAG00000032051	SULT1C4	5.64515	5.04724	3.25329	protein_coding	Up
ENSBTAG00000032265	RTP4	5.01214	5.31289	-1.59137	protein_coding	Down
ENSBTAG00000032292	CCDC159	6.78186	7.22909	-2.38107	protein_coding	Down
ENSBTAG00000032436	UBC	8.63011	8.22154	2.2325	protein_coding	Up
ENSBTAG00000032517	BCL7A	6.82195	6.39271	2.34396	protein_coding	Up
ENSBTAG00000032548	SYBU	5.62503	5.33836	1.57536	protein_coding	Up
ENSBTAG00000032591	CTHRC1	5.02162	5.38407	-1.92397	protein_coding	Down
ENSBTAG00000032719	TFRC	11.4941	12.1818	-3.6774	protein_coding	Down
ENSBTAG00000032887	SUPT3H	6.72979	6.39552	1.832	protein_coding	Up
ENSBTAG00000032996	P4HA1	8.47118	8.80309	-1.75936	protein_coding	Down
ENSBTAG00000033008	MYOZ1	15.5777	15.2848	1.60925	protein_coding	Up
ENSBTAG00000033174	TFAP4	6.10845	5.5667	2.95053	protein_coding	Up
ENSBTAG00000033197	EPDR1	8.73931	9.21708	-2.54565	protein_coding	Down
ENSBTAG00000033254	PJVK	4.8025	5.1082	-1.61811	protein_coding	Down
ENSBTAG00000033315	DNAJC1	7.25098	6.89408	1.95396	protein_coding	Up
ENSBTAG00000033365	METTL24	4.85389	4.57658	1.52497	protein_coding	Up
ENSBTAG00000033515		5.54634	5.86891	-1.70899	protein_coding	Down
ENSBTAG00000033679	HLCS	6.94178	7.36525	-2.25296	protein_coding	Down
ENSBTAG00000033731	PRCP	6.58172	6.87739	-1.56399	protein_coding	Down
ENSBTAG00000033835	MPZ	8.59252	9.07155	-2.55251	protein_coding	Down
ENSBTAG00000034069	MAB21L1	6.94565	6.53332	2.25281	protein_coding	Up
ENSBTAG00000034193	BCO2	6.1918	6.54021	-1.84828	protein_coding	Down
ENSBTAG00000034349	IFI44	4.6978	5.1937	-2.64344	protein_coding	Down
ENSBTAG00000034368	PRSS33	5.08832	4.80095	1.57917	protein_coding	Up
ENSBTAG00000034662		6.20741	5.39879	4.3892	protein_coding	Up
ENSBTAG00000034987	MKKS	9.23898	9.58945	-1.85942	protein_coding	Down
ENSBTAG00000035199		4.94223	5.27241	-1.75007	protein_coding	Down
ENSBTAG00000035844	PLAAT1	9.01205	9.3204	-1.63234	protein_coding	Down
ENSBTAG00000037404	LRFN4	5.30745	5.59955	-1.54475	protein_coding	Down
ENSBTAG00000037523	B3GALT6	6.12116	5.79119	1.80879	protein_coding	Up
ENSBTAG00000037644	HBB	8.86828	9.78694	-4.92255	protein_coding	Down
ENSBTAG00000037673	GSTM1	6.39333	6.09578	1.63403	protein_coding	Up
ENSBTAG00000037756	TET1	6.85367	7.26024	-2.16183	protein_coding	Down
ENSBTAG00000037778	CXCL3	5.82947	5.48526	1.88558	protein_coding	Up
ENSBTAG00000037937		5.22279	5.833	-3.25967	protein_coding	Down
ENSBTAG00000037980	TSEN2	6.58815	6.22114	2.00847	protein_coding	Up
ENSBTAG00000038048	MRC1	8.07114	8.72655	-3.50339	protein_coding	Down
ENSBTAG00000038112		5.31508	5.61747	-1.60022	protein_coding	Down
ENSBTAG00000038128	BOLA-DQA5	5.00809	5.75192	-3.97997	protein_coding	Down
ENSBTAG00000038186	GLRX	8.25839	8.75484	-2.64639	protein_coding	Down
ENSBTAG00000038233		5.34171	6.11592	-4.14379	protein_coding	Down
ENSBTAG00000038251	NAA16	7.5013	7.18695	1.72459	protein_coding	Up
ENSBTAG00000038286	PPDPFL	9.09293	8.03108	5.75434	protein_coding	Up
ENSBTAG00000038321	LIPE	7.89863	7.21339	3.72405	protein_coding	Up
ENSBTAG00000038377	ADAM20	5.16543	5.48918	-1.71539	protein_coding	Down
ENSBTAG00000038464	PLIN5	8.56149	7.9465	3.34535	protein_coding	Up
ENSBTAG00000038536		6.16886	6.54883	-2.01849	protein_coding	Down
ENSBTAG00000038625		5.02106	5.80258	-4.18317	protein_coding	Down
ENSBTAG00000038716	SKI	9.37141	9.01824	1.93391	protein_coding	Up
ENSBTAG00000038844	ANKRD35	6.97674	7.29128	-1.66573	protein_coding	Down
ENSBTAG00000038889	RILP	11.2847	10.7912	2.69053	protein_coding	Up
ENSBTAG00000038938	GBP2	4.41876	4.93454	-2.75061	protein_coding	Down
ENSBTAG00000039190	SLC9A5	8.31832	8.85534	-2.86515	protein_coding	Down
ENSBTAG00000039196		4.56866	4.94695	-2.00937	protein_coding	Down
ENSBTAG00000039275	ERAP2	6.60525	7.44248	-4.48352	protein_coding	Down
ENSBTAG00000039329	RAET1G	6.15472	5.26422	4.83062	protein_coding	Up
ENSBTAG00000039335	ARRDC2	7.6665	7.24652	2.29409	protein_coding	Up
ENSBTAG00000039440		5.24741	4.82321	2.31678	protein_coding	Up
ENSBTAG00000039594	ZNF862	5.96328	5.68795	1.51424	protein_coding	Up
ENSBTAG00000039618	ARL14EPL	4.70063	5.09675	-2.1055	protein_coding	Down
ENSBTAG00000039686	ACOT11	6.55817	6.20998	1.90705	protein_coding	Up
ENSBTAG00000039719	PHGDH	7.43808	8.02084	-3.11171	protein_coding	Down
ENSBTAG00000039720	TMEM225B	7.28818	7.65631	-1.95459	protein_coding	Down
ENSBTAG00000039861	OAS1Y	6.0236	6.49721	-2.52328	protein_coding	Down
ENSBTAG00000039992	TUBA1C	4.85979	5.15603	-1.56705	protein_coding	Down
ENSBTAG00000040055	CAB39	10.648	10.3258	1.76698	protein_coding	Up
ENSBTAG00000040082	HOXA10	6.7095	6.26701	2.4154	protein_coding	Up
ENSBTAG00000040116	H1-10	10.3964	10.0977	1.64026	protein_coding	Up
ENSBTAG00000040334	MEX3D	9.07787	8.73634	1.8711	protein_coding	Up
ENSBTAG00000040338	OBSL1	11.9845	12.3247	-1.80403	protein_coding	Down
ENSBTAG00000040398	CRACD	9.54264	9.0699	2.57847	protein_coding	Up
ENSBTAG00000043548		5.26276	4.69106	3.11193	Mt_tRNA	Up
ENSBTAG00000043961	MPDZ	9.56604	9.93015	-1.93297	protein_coding	Down
ENSBTAG00000043971	NOTCH3	8.61949	8.92326	-1.60765	protein_coding	Down
ENSBTAG00000043976	RNFT2	6.19078	6.84532	-3.49863	protein_coding	Down
ENSBTAG00000044003	TEX10	7.32948	6.88701	2.41527	protein_coding	Up
ENSBTAG00000044015	RBM12	7.67648	7.39345	1.55578	protein_coding	Up
ENSBTAG00000044022	KIAA1671	7.00154	6.56083	2.40584	protein_coding	Up
ENSBTAG00000044071	HRH2	7.63587	7.2607	2.05248	protein_coding	Up
ENSBTAG00000044097	KLF7	5.5328	5.93492	-2.13786	protein_coding	Down
ENSBTAG00000044105	FOXO1	7.8017	7.43679	1.99719	protein_coding	Up
ENSBTAG00000044125	TLCD4	5.3773	5.68457	-1.62654	protein_coding	Down
ENSBTAG00000044126	SNTB1	11.9888	11.6985	1.59473	protein_coding	Up
ENSBTAG00000044132	NTN5	4.97035	5.45734	-2.5954	protein_coding	Down
ENSBTAG00000044192	MAF	10.2595	9.82131	2.39197	protein_coding	Up
ENSBTAG00000044202	CNKSR2	7.42501	7.05404	2.02984	protein_coding	Up
ENSBTAG00000044204	CD79B	4.72568	5.14978	-2.25631	protein_coding	Down
ENSBTAG00000045509	FAM217B	5.14181	5.48499	-1.82015	protein_coding	Down
ENSBTAG00000045593	EARS2	8.18988	7.86687	1.77128	protein_coding	Up
ENSBTAG00000045604	TTC9	9.41733	8.88895	2.87843	protein_coding	Up
ENSBTAG00000045904	PIM3	9.81585	9.48518	1.8126	protein_coding	Up
ENSBTAG00000045925	CITED1	6.4634	6.04702	2.27464	protein_coding	Up
ENSBTAG00000046047		5.44699	4.99582	2.4622	protein_coding	Up
ENSBTAG00000046122	NRARP	5.58683	5.25139	1.83832	protein_coding	Up
ENSBTAG00000046140	NPDC1	8.19617	7.89569	1.64982	protein_coding	Up
ENSBTAG00000046177	IGFN1	15.2971	14.7299	3.08803	protein_coding	Up
ENSBTAG00000046193		6.04693	6.48345	-2.32332	protein_coding	Down
ENSBTAG00000046218	KLF11	8.02413	7.57698	2.44054	protein_coding	Up
ENSBTAG00000046286	CCNB3	5.68805	5.97453	-1.51443	protein_coding	Down
ENSBTAG00000046307	CEBPD	9.19295	8.38125	4.40579	protein_coding	Up
ENSBTAG00000046358	PABPC1	11.0309	10.7093	1.76332	protein_coding	Up
ENSBTAG00000046467	PTP4A3	11.9053	11.5311	2.04768	protein_coding	Up
ENSBTAG00000046512	XIRP1	11.3128	10.2598	5.70663	protein_coding	Up
ENSBTAG00000046580	DHX58	5.09434	5.41423	-1.69456	protein_coding	Down
ENSBTAG00000046585	RTL1	4.39434	4.82573	-2.29567	protein_coding	Down
ENSBTAG00000046587	CST6	11.1953	11.5938	-2.11842	protein_coding	Down
ENSBTAG00000046671	WFS1	8.86447	9.28704	-2.2481	protein_coding	Down
ENSBTAG00000046677	RTN4R	4.84455	4.5606	1.56071	protein_coding	Up
ENSBTAG00000046857	TEDC1	4.60367	4.92446	-1.6994	protein_coding	Down
ENSBTAG00000046862	MARCKSL1	6.86529	6.3623	2.74153	protein_coding	Up
ENSBTAG00000046939	TMEM250	9.56628	9.88995	-1.7149	protein_coding	Down
ENSBTAG00000046941		4.79631	5.10096	-1.61241	protein_coding	Down
ENSBTAG00000046980	KLRF2	4.3938	4.05977	1.83067	protein_coding	Up
ENSBTAG00000046989	MANEAL	6.54294	6.21068	1.82115	protein_coding	Up
ENSBTAG00000047214	TRAPPC1	8.14915	8.47216	-1.71143	protein_coding	Down
ENSBTAG00000047330	FABP5	10.1389	9.62063	2.82374	protein_coding	Up
ENSBTAG00000047339	BCOR	8.5855	8.11445	2.56935	protein_coding	Up
ENSBTAG00000047416	HEPH	4.66313	5.00254	-1.79978	protein_coding	Down
ENSBTAG00000047420	BTNL9	9.21245	8.73396	2.60945	protein_coding	Up
ENSBTAG00000047441		7.2027	7.90184	-3.73904	protein_coding	Down
ENSBTAG00000047502	FKBP5	11.6001	10.4321	6.32685	protein_coding	Up
ENSBTAG00000047532	TRIQK	4.777	5.08702	-1.64134	protein_coding	Down
ENSBTAG00000047582	CSNK1E	7.9969	7.72345	1.50408	protein_coding	Up
ENSBTAG00000047605		6.47216	6.13918	1.82504	protein_coding	Up
ENSBTAG00000047637		6.5156	6.85184	-1.78274	protein_coding	Down
ENSBTAG00000047752	OTUD1	8.96047	7.97074	5.36558	protein_coding	Up
ENSBTAG00000047755	FNDC10	8.5828	8.97433	-2.08079	protein_coding	Down
ENSBTAG00000047786	LRRC10B	5.81757	6.30239	-2.58371	protein_coding	Down
ENSBTAG00000047955	ZNF774	6.96622	6.52858	2.38928	protein_coding	Up
ENSBTAG00000047991	TAF4	8.06388	7.78602	1.52789	protein_coding	Up
ENSBTAG00000048011	GPR160	5.08937	4.70946	2.07807	protein_coding	Up
ENSBTAG00000048059	TMEM86A	5.89887	5.43502	2.53052	protein_coding	Up
ENSBTAG00000048228		8.00929	7.4334	3.13454	protein_coding	Up
ENSBTAG00000048308	ICMT	7.59199	7.27566	1.73528	protein_coding	Up
ENSBTAG00000048340		5.66141	5.30912	1.92915	protein_coding	Up
ENSBTAG00000048485	TUBB2A	6.80207	7.13749	-1.77827	protein_coding	Down
ENSBTAG00000048486	IQANK1	6.35653	6.05473	1.65692	protein_coding	Up
ENSBTAG00000048515		9.56795	10.1488	-3.10142	lncRNA	Down
ENSBTAG00000048562		5.08754	4.79405	1.61218	protein_coding	Up
ENSBTAG00000048608	5_8S_rRNA	6.50111	6.10218	2.18058	rRNA	Up
ENSBTAG00000048620		7.75089	8.10733	-1.8916	protein_coding	Down
ENSBTAG00000048660	C19H17orf113	6.63671	6.22321	2.25913	protein_coding	Up
ENSBTAG00000048728		6.57529	6.95694	-2.02746	lncRNA	Down
ENSBTAG00000048781		11.8121	11.2462	3.0803	lncRNA	Up
ENSBTAG00000048782		10.2928	10.7078	-2.20752	protein_coding	Down
ENSBTAG00000048790		6.81686	6.42689	2.13227	protein_coding	Up
ENSBTAG00000048796		6.16266	6.50632	-1.8227	lncRNA	Down
ENSBTAG00000048856	C16H1orf115	7.41295	7.72185	-1.63528	protein_coding	Down
ENSBTAG00000048887		5.95807	5.53153	2.32944	lncRNA	Up
ENSBTAG00000048950	ULBP13	7.66015	6.94739	3.87246	protein_coding	Up
ENSBTAG00000048972		6.13448	6.48782	-1.87493	lncRNA	Down
ENSBTAG00000049215	SHISA3	7.67758	6.80784	4.71869	protein_coding	Up
ENSBTAG00000049233		7.35288	6.99124	1.97954	protein_coding	Up
ENSBTAG00000049294		7.00172	6.71062	1.59927	protein_coding	Up
ENSBTAG00000049300	AARSD1	9.28717	9.59931	-1.6528	protein_coding	Down
ENSBTAG00000049331		6.41033	6.12549	1.56556	lncRNA	Up
ENSBTAG00000049378		7.21217	7.57212	-1.91054	lncRNA	Down
ENSBTAG00000049478		5.57559	5.20569	2.02407	protein_coding	Up
ENSBTAG00000049594		5.16045	5.53352	-1.98126	lncRNA	Down
ENSBTAG00000049685	PTDSS2	9.5174	9.18589	1.81711	protein_coding	Up
ENSBTAG00000049783		4.60313	5.07578	-2.51812	protein_coding	Down
ENSBTAG00000049807	HS6ST2	4.73754	5.07596	-1.79443	protein_coding	Down
ENSBTAG00000049809		5.75839	5.44214	1.73484	protein_coding	Up
ENSBTAG00000049814		5.41117	5.75439	-1.82032	protein_coding	Down
ENSBTAG00000049825		7.02803	7.53182	-2.68596	lncRNA	Down
ENSBTAG00000049852		5.98626	5.19377	4.30221	lncRNA	Up
ENSBTAG00000049870		4.81895	5.17715	-1.90111	protein_coding	Down
ENSBTAG00000049909	AGBL1	7.58789	7.90335	-1.67065	protein_coding	Down
ENSBTAG00000050113		5.27749	4.93879	1.85584	lncRNA	Up
ENSBTAG00000050177		5.16567	4.76118	2.21054	lncRNA	Up
ENSBTAG00000050675	BOLA3	9.34444	9.9379	-3.16937	protein_coding	Down
ENSBTAG00000050678		5.70899	6.09963	-2.07596	lncRNA	Down
ENSBTAG00000050737		4.75551	4.33412	2.30163	protein_coding	Up
ENSBTAG00000050776		4.81529	5.10636	-1.53922	lncRNA	Down
ENSBTAG00000050846		5.47566	6.5052	-5.52029	protein_coding	Down
ENSBTAG00000050891		6.78711	6.26292	2.85584	lncRNA	Up
ENSBTAG00000050914	CYYR1	8.44839	8.10141	1.90049	protein_coding	Up
ENSBTAG00000051048		4.70071	5.04457	-1.8238	lncRNA	Down
ENSBTAG00000051072	AQP4	8.38034	8.93744	-2.97338	protein_coding	Down
ENSBTAG00000051102	KCNK3	7.73579	7.24246	2.68948	protein_coding	Up
ENSBTAG00000051111		5.1728	5.60668	-2.30907	lncRNA	Down
ENSBTAG00000051202		5.25929	5.62785	-1.95694	lncRNA	Down
ENSBTAG00000051206	KY	9.50871	10.1961	-3.67582	protein_coding	Down
ENSBTAG00000051224	ARSD	4.60761	4.89236	-1.50509	protein_coding	Down
ENSBTAG00000051230	SLC43A1	8.75888	8.4283	1.8121	protein_coding	Up
ENSBTAG00000051277		4.77935	4.31692	2.52288	lncRNA	Up
ENSBTAG00000051401		6.81388	6.33949	2.58734	lncRNA	Up
ENSBTAG00000051412	HBA	7.43726	8.05719	-3.31206	protein_coding	Down
ENSBTAG00000051440		4.96181	4.68548	1.51963	lncRNA	Up
ENSBTAG00000051467	COA6	8.17926	8.46531	-1.51215	protein_coding	Down
ENSBTAG00000051480	FGF13	6.41285	6.13455	1.53027	protein_coding	Up
ENSBTAG00000051519		6.25504	7.51403	-6.75722	protein_coding	Down
ENSBTAG00000051540	FNDC5	6.9693	7.31046	-1.80927	protein_coding	Down
ENSBTAG00000051541	COLQ	4.68766	4.98028	-1.54756	protein_coding	Down
ENSBTAG00000051621	SLX4IP	6.67244	7.14813	-2.53447	protein_coding	Down
ENSBTAG00000051704	TNFRSF10D	6.99308	7.53643	-2.89923	protein_coding	Down
ENSBTAG00000051719		4.89055	5.23582	-1.83142	lncRNA	Down
ENSBTAG00000051730		4.73462	5.07146	-1.78592	lncRNA	Down
ENSBTAG00000051744		5.93544	6.31881	-2.03679	protein_coding	Down
ENSBTAG00000051828		7.66713	8.20042	-2.84497	pseudogene	Down
ENSBTAG00000051860		8.58478	9.03445	-2.39422	pseudogene	Down
ENSBTAG00000051917	ZNF579	8.38211	8.10034	1.54894	protein_coding	Up
ENSBTAG00000051972	CEBPB	10.2566	9.833	2.31376	protein_coding	Up
ENSBTAG00000052038		6.65828	6.27084	2.11868	lncRNA	Up
ENSBTAG00000052059		5.46856	5.09755	2.03004	lncRNA	Up
ENSBTAG00000052213	ADIPOQ	4.18352	4.65383	-2.50546	protein_coding	Down
ENSBTAG00000052226		7.65387	7.2398	2.26219	protein_coding	Up
ENSBTAG00000052230		6.06935	5.26908	4.34417	protein_coding	Up
ENSBTAG00000052232		7.24092	7.58104	-1.80367	lncRNA	Down
ENSBTAG00000052369		7.06332	6.65347	2.23944	lncRNA	Up
ENSBTAG00000052413	GNAS	10.8575	10.0254	4.51596	protein_coding	Up
ENSBTAG00000052504	KLF2	8.41237	7.96827	2.42406	protein_coding	Up
ENSBTAG00000052518	TUBB4B	11.5885	11.9467	-1.90105	protein_coding	Down
ENSBTAG00000052600		9.11611	8.68187	2.37089	protein_coding	Up
ENSBTAG00000052606	TRIM5	6.03247	6.53849	-2.69801	protein_coding	Down
ENSBTAG00000052720		8.85121	8.20448	3.51646	protein_coding	Up
ENSBTAG00000052735		6.08443	6.46211	-2.00606	lncRNA	Down
ENSBTAG00000052791	JUND	10.9275	10.2539	3.6614	protein_coding	Up
ENSBTAG00000052869		4.72764	5.23056	-2.68127	protein_coding	Down
ENSBTAG00000052878		5.43447	6.07306	-3.41271	protein_coding	Down
ENSBTAG00000052909	C8G	7.27069	7.60515	-1.77307	protein_coding	Down
ENSBTAG00000053050	SAMD9	4.99055	5.45814	-2.49078	pseudogene	Down
ENSBTAG00000053343		4.86031	5.1989	-1.79536	lncRNA	Down
ENSBTAG00000053361	KLHL30	8.52433	8.13009	2.15525	protein_coding	Up
ENSBTAG00000053442		7.38334	7.10101	1.55199	protein_coding	Up
ENSBTAG00000053595	HOXA9	8.57924	7.89619	3.71231	protein_coding	Up
ENSBTAG00000053836	CCDC71L	6.34993	6.0173	1.82313	protein_coding	Up
ENSBTAG00000053923	EXOSC6	7.71332	7.35378	1.96827	protein_coding	Up
ENSBTAG00000053951	SPX	8.90666	9.26282	-1.89006	protein_coding	Down
ENSBTAG00000054072	ADM2	4.49763	4.80266	-1.61446	protein_coding	Down
ENSBTAG00000054131	TWF2	10.8591	10.5702	1.58741	protein_coding	Up
ENSBTAG00000054218	IGFBP5	9.55755	10.3141	-4.04838	protein_coding	Down
ENSBTAG00000054241		7.14011	6.77422	2.00243	protein_coding	Up
ENSBTAG00000054394		9.11802	9.44508	-1.7332	protein_coding	Down
ENSBTAG00000054579		4.64702	4.99547	-1.84855	protein_coding	Down
ENSBTAG00000054592	SCN2B	4.71445	5.24759	-2.84414	protein_coding	Down
ENSBTAG00000054700		5.44	4.96454	2.59317	protein_coding	Up
ENSBTAG00000054719	TRNP1	5.3117	5.03196	1.53803	protein_coding	Up
ENSBTAG00000054758		4.96202	5.30942	-1.84291	misc_RNA	Down
ENSBTAG00000054808	MT1A	5.39638	5.70514	-1.63456	protein_coding	Down
ENSBTAG00000054911	ANO9	5.37067	5.69734	-1.7311	protein_coding	Down
ENSBTAG00000055223		4.71614	5.083	-1.94777	lncRNA	Down
