# Supplementary material for: Supranutritional Maternal Organic Selenium Supplementation during Different Trimesters of Pregnancy Affects the Muscle Gene Transcriptome of Newborn Beef Calves in a Time-Dependent Manner
Source: Genes (Basel). 2021 Nov 25;12(12):1884. doi: 10.3390/genes12121884 (PMC8701265; doi:10.3390/genes12121884)
Supplement: Supplementary file 1 [file genes-12-01884-s001.zip › Supplementary Table S4_.xlsx]

## Sheet: Description
Supranutritional Maternal Organic Selenium Supplementation During Different Trimesters of Pregnancy Affects the Muscle Gene Transcriptome of Newborn Beef Calves in a Time-dependent Manner
Wellison J. S. Diniz 1,*; Gerd Bobe 2,3; Joseph J. Klopfenstein 4; Yunus Gultekin 2; T. Zane Davis 5; Alison K. Ward 6; Jean A. Hall 7,*
1 Department of Animal Sciences, Auburn University; Auburn, AL 3849, USA; wzd0027@auburn.edu 2 Department of Animal and Rangeland Sciences, College of Agricultural Sciences, Oregon State University, Corvallis, OR, USA; yunus.gultekin@oregonstate.edu; gerd.bobe@oregonstate.edu 3 Linus Pauling Institute, Oregon State University, Corvallis, OR 97331, USA; 4 Department of Clinical Sciences, Carlson C…
Data Description
Tab 1.	Differentially expressed genes between TR3 vs. CTR groups from muscle tissue.

## Sheet: Tab. 1
Differentaily expressed genes between TR3 vs. CTR groups from muscle tissue (FDR < 0.05 and |log2 fc| > 1.5)
Ensembl ID	Gene Symbol	TR3	CON	Diff	Gene_biotype	Status
ENSBTAG00000000042	PYCR1	8.02573	7.70963	2.60273	protein_coding	Up
ENSBTAG00000000071	PMP2	5.80702	5.42062	3.18319	protein_coding	Up
ENSBTAG00000000079	CCSAP	4.67951	4.94924	-2.23479	protein_coding	Down
ENSBTAG00000000124	DHH	5.022	4.75453	2.2011	protein_coding	Up
ENSBTAG00000000125	SPATA5	6.91521	7.26436	-2.8906	protein_coding	Down
ENSBTAG00000000128	FGF18	5.79309	5.46635	2.69063	protein_coding	Up
ENSBTAG00000000139	KMT5A	8.68504	8.49364	1.57302	protein_coding	Up
ENSBTAG00000000140	EPHX1	8.52272	8.76952	-2.04548	protein_coding	Down
ENSBTAG00000000163	DDIT4	10.1249	10.3172	-1.59558	protein_coding	Down
ENSBTAG00000000188	HS3ST5	4.64203	4.86934	-1.88448	protein_coding	Down
ENSBTAG00000000240	AKAP7	6.91242	6.62027	2.405	protein_coding	Up
ENSBTAG00000000321	TBL2	6.9583	6.76294	1.60565	protein_coding	Up
ENSBTAG00000000328	TPPP2	4.83074	4.61713	1.75637	protein_coding	Up
ENSBTAG00000000333	ARHGAP20	4.77061	4.96164	-1.58489	protein_coding	Down
ENSBTAG00000000448	BDH1	6.47727	6.14857	2.70675	protein_coding	Up
ENSBTAG00000000507	NR4A1	10.7262	10.4373	2.37837	protein_coding	Up
ENSBTAG00000000570	RET	7.79959	7.51761	2.32096	protein_coding	Up
ENSBTAG00000000588	CHODL	7.37047	7.6714	-2.49246	protein_coding	Down
ENSBTAG00000000601	COL11A2	7.00434	6.67112	2.74415	protein_coding	Up
ENSBTAG00000000616	GPR161	5.35889	5.16454	1.59733	protein_coding	Up
ENSBTAG00000000671	PARP3	5.47412	5.26095	1.75273	protein_coding	Up
ENSBTAG00000000672	OTULINL	6.27872	6.03231	2.02725	protein_coding	Up
ENSBTAG00000000687	POC1B	7.34636	7.5293	-1.51806	protein_coding	Down
ENSBTAG00000000753	PIAS4	7.95651	7.7444	1.74401	protein_coding	Up
ENSBTAG00000000778	HSP90AB1	12.6525	12.9193	-2.21058	protein_coding	Down
ENSBTAG00000000835	BCAS1	5.90404	5.66418	1.97313	protein_coding	Up
ENSBTAG00000000838	CCDC88C	11.053	11.2483	-1.6202	protein_coding	Down
ENSBTAG00000000854	SEC16B	5.42099	5.19758	1.83737	protein_coding	Up
ENSBTAG00000000897	IQGAP2	5.13801	4.95371	1.51439	protein_coding	Up
ENSBTAG00000000917	BMP1	8.44411	8.22103	1.83463	protein_coding	Up
ENSBTAG00000000919	HEY2	5.48545	5.18153	2.50208	protein_coding	Up
ENSBTAG00000000955	RBM41	6.08207	5.87788	1.67861	protein_coding	Up
ENSBTAG00000000987	OTOG	7.28423	6.9675	2.60798	protein_coding	Up
ENSBTAG00000001021	CYP1A1	6.35889	6.66548	-2.53915	protein_coding	Down
ENSBTAG00000001027	SERPINH1	10.1045	10.2944	-1.57556	protein_coding	Down
ENSBTAG00000001094	MTUS2	6.47197	6.68875	-1.79759	protein_coding	Down
ENSBTAG00000001116	P4HA2	8.24208	8.46777	-1.87115	protein_coding	Down
ENSBTAG00000001139	ACHE	6.58548	6.16655	3.45183	protein_coding	Up
ENSBTAG00000001143		4.98357	5.17967	-1.62679	protein_coding	Down
ENSBTAG00000001151	APLP1	6.96073	6.77801	1.5014	protein_coding	Up
ENSBTAG00000001156	ST3GAL1	5.41535	5.09937	2.60173	protein_coding	Up
ENSBTAG00000001176	LRRN1	8.45222	8.6578	-1.70507	protein_coding	Down
ENSBTAG00000001233	MPZL3	5.35748	5.62472	-2.21416	protein_coding	Down
ENSBTAG00000001258	TMEM50B	8.00062	8.20548	-1.69913	protein_coding	Down
ENSBTAG00000001308		4.70689	4.97907	-2.25503	protein_coding	Down
ENSBTAG00000001329	CLPTM1L	9.44613	9.64669	-1.6636	protein_coding	Down
ENSBTAG00000001344	METTL21E	9.00916	8.51105	4.10572	protein_coding	Up
ENSBTAG00000001398	ATP2A2	15.0416	14.8553	1.53167	protein_coding	Up
ENSBTAG00000001410	GRAMD1B	5.6913	5.49802	1.58853	protein_coding	Up
ENSBTAG00000001471	POC1A	5.74046	5.46949	2.23005	protein_coding	Up
ENSBTAG00000001484	LZTFL1	6.65495	6.84787	-1.60048	protein_coding	Down
ENSBTAG00000001508	SH3RF1	7.37393	7.58525	-1.75245	protein_coding	Down
ENSBTAG00000001538		5.06119	5.28844	-1.88397	protein_coding	Down
ENSBTAG00000001576	TMEM140	6.97072	7.23207	-2.1656	protein_coding	Down
ENSBTAG00000001600	DCUN1D4	6.4647	6.26264	1.661	protein_coding	Up
ENSBTAG00000001609	MAP2K6	9.50736	9.2321	2.26543	protein_coding	Up
ENSBTAG00000001626	CTPS1	7.13511	7.32602	-1.58389	protein_coding	Down
ENSBTAG00000001640	EPB41L1	6.99375	6.78668	1.70239	protein_coding	Up
ENSBTAG00000001687	STC1	5.47514	5.70406	-1.89782	protein_coding	Down
ENSBTAG00000001706	SLC9A2	7.92215	7.54019	3.14658	protein_coding	Up
ENSBTAG00000001710	CMTM8	5.60337	5.80502	-1.6726	protein_coding	Down
ENSBTAG00000001748	TRIM45	7.05354	6.8011	2.0771	protein_coding	Up
ENSBTAG00000001773	CYREN	7.28794	7.67368	-3.19276	protein_coding	Down
ENSBTAG00000001786	HYKK	6.78703	7.07024	-2.34606	protein_coding	Down
ENSBTAG00000001788	PDPN	5.75904	5.55738	1.6577	protein_coding	Up
ENSBTAG00000001801	SYT4	6.96879	6.71536	2.0852	protein_coding	Up
ENSBTAG00000001816	SLC25A42	7.95991	7.66987	2.38754	protein_coding	Up
ENSBTAG00000001835	GJA1	6.56617	6.29017	2.27166	protein_coding	Up
ENSBTAG00000001836		7.27575	6.96582	2.55181	protein_coding	Up
ENSBTAG00000001848	KATNB1	7.27991	7.51666	-1.9624	protein_coding	Down
ENSBTAG00000001851		6.20784	5.89892	2.54347	protein_coding	Up
ENSBTAG00000001858		8.64235	7.90829	6.05396	protein_coding	Up
ENSBTAG00000001864	NR4A3	4.8766	4.68296	1.59151	protein_coding	Up
ENSBTAG00000001867	SACS	7.41674	7.16985	2.03124	protein_coding	Up
ENSBTAG00000001874	DOCK3	4.91733	4.73375	1.50845	protein_coding	Up
ENSBTAG00000001879	PER2	6.76321	6.99778	-1.94442	protein_coding	Down
ENSBTAG00000001908	DLD	12.5579	12.3407	1.78579	protein_coding	Up
ENSBTAG00000001920	POLQ	5.88243	5.58109	2.48083	protein_coding	Up
ENSBTAG00000001922	AKIP1	6.88559	7.17934	-2.43314	protein_coding	Down
ENSBTAG00000001936	PCK1	5.09743	4.83984	2.11954	protein_coding	Up
ENSBTAG00000001938	CKS2	5.32043	5.53351	-1.76696	protein_coding	Down
ENSBTAG00000001945	ARG2	5.73952	5.33237	3.35456	protein_coding	Up
ENSBTAG00000001966	PDGFRL	6.04779	6.2614	-1.77139	protein_coding	Down
ENSBTAG00000001983	SMAGP	5.21555	5.0076	1.70965	protein_coding	Up
ENSBTAG00000002023	NOS1	6.0721	5.81603	2.10704	protein_coding	Up
ENSBTAG00000002024	ASB18	7.3019	7.01676	2.34708	protein_coding	Up
ENSBTAG00000002069	BOLA	10.0267	10.5397	-4.24318	protein_coding	Down
ENSBTAG00000002078	KDM4A	8.73381	8.55102	1.50193	protein_coding	Up
ENSBTAG00000002096	FCGR3A	4.64839	4.94116	-2.42499	protein_coding	Down
ENSBTAG00000002113	ZNF41	5.69786	5.50027	1.62412	protein_coding	Up
ENSBTAG00000002144	ADRB2	7.22816	7.46754	-1.98414	protein_coding	Down
ENSBTAG00000002157	LMOD2	12.2	12.5792	-3.13847	protein_coding	Down
ENSBTAG00000002170	NOVA1	4.71098	4.99741	-2.37269	protein_coding	Down
ENSBTAG00000002174	RERG	5.7347	5.91593	-1.50404	protein_coding	Down
ENSBTAG00000002178	PPL	6.79547	6.58138	1.76041	protein_coding	Up
ENSBTAG00000002216	MYOD1	9.88379	9.46594	3.44298	protein_coding	Up
ENSBTAG00000002224	UHRF1	5.51629	5.25144	2.17959	protein_coding	Up
ENSBTAG00000002249	NAALADL1	4.90922	5.12438	-1.7841	protein_coding	Down
ENSBTAG00000002261	LBX1	7.09468	6.86014	1.92923	protein_coding	Up
ENSBTAG00000002283	FZD7	7.80264	7.54622	2.10996	protein_coding	Up
ENSBTAG00000002294	SIM1	4.21613	4.42379	-1.72218	protein_coding	Down
ENSBTAG00000002299	SEL1L3	10.1905	10.4609	-2.23985	protein_coding	Down
ENSBTAG00000002311	REEP6	4.68991	4.96809	-2.30456	protein_coding	Down
ENSBTAG00000002315	RNF34	10.0013	9.78865	1.74888	protein_coding	Up
ENSBTAG00000002333	HOPX	5.76207	6.18301	-3.48336	protein_coding	Down
ENSBTAG00000002377	PSMB2	9.23757	9.42145	-1.52587	protein_coding	Down
ENSBTAG00000002382	DDX10	6.54055	6.77191	-1.91795	protein_coding	Down
ENSBTAG00000002385	SLC35E4	7.8903	7.67683	1.75527	protein_coding	Up
ENSBTAG00000002416		5.10972	5.34156	-1.92186	protein_coding	Down
ENSBTAG00000002451	TTC39A	5.73359	5.45166	2.32054	protein_coding	Up
ENSBTAG00000002472	CASP9	5.41938	5.65908	-1.98683	protein_coding	Down
ENSBTAG00000002480	NUDT1	6.24172	6.43404	-1.59557	protein_coding	Down
ENSBTAG00000002490	CHPT1	9.54187	9.77187	-1.90671	protein_coding	Down
ENSBTAG00000002516	CCDC130	6.80118	7.01496	-1.77277	protein_coding	Down
ENSBTAG00000002527	ZSWIM4	6.29554	6.04863	2.03133	protein_coding	Up
ENSBTAG00000002574	MYOZ2	13.0923	12.903	1.55592	protein_coding	Up
ENSBTAG00000002585	SLC16A2	5.6008	5.33346	2.20007	protein_coding	Up
ENSBTAG00000002612	FANCM	6.98851	7.19665	-1.72617	protein_coding	Down
ENSBTAG00000002644	KCNQ4	8.90642	8.72103	1.52341	protein_coding	Up
ENSBTAG00000002661	ISLR2	5.31677	5.12554	1.57157	protein_coding	Up
ENSBTAG00000002670	DEPP1	5.48467	5.83867	-2.9306	protein_coding	Down
ENSBTAG00000002678	MED18	6.0084	6.23304	-1.86246	protein_coding	Down
ENSBTAG00000002685	PITRM1	9.07538	9.27046	-1.61833	protein_coding	Down
ENSBTAG00000002688	ATP1B1	11.2185	11.0022	1.77863	protein_coding	Up
ENSBTAG00000002698	UBE3B	9.5704	9.77232	-1.67489	protein_coding	Down
ENSBTAG00000002706	GSTZ1	7.1414	7.32943	-1.56014	protein_coding	Down
ENSBTAG00000002710	TSSK4	4.98713	5.17203	-1.5343	protein_coding	Down
ENSBTAG00000002714	GNAI1	6.06145	5.77408	2.36544	protein_coding	Up
ENSBTAG00000002744	MUSK	5.37915	5.19246	1.53407	protein_coding	Up
ENSBTAG00000002749	CRHR1	5.27372	4.79009	3.98616	lncRNA	Up
ENSBTAG00000002786		4.5707	4.97416	-3.33901	protein_coding	Down
ENSBTAG00000002792	FUT11	5.96211	5.70327	2.12991	protein_coding	Up
ENSBTAG00000002816	SARM1	5.14609	4.85502	2.39611	protein_coding	Up
ENSBTAG00000002817	SLC46A1	5.55468	5.85543	-2.4909	protein_coding	Down
ENSBTAG00000002823	MPZL1	8.61546	8.85147	-1.95633	protein_coding	Down
ENSBTAG00000002880	SORBS1	10.0025	9.65011	2.90267	protein_coding	Up
ENSBTAG00000002915	GPR63	4.8644	5.16095	-2.45622	protein_coding	Down
ENSBTAG00000002922	GAB2	7.14058	7.35587	-1.78523	protein_coding	Down
ENSBTAG00000002939	FURIN	9.55972	9.34527	1.76332	protein_coding	Up
ENSBTAG00000003012	TRAF1	6.21044	6.46167	-2.08195	protein_coding	Down
ENSBTAG00000003015	SESN1	9.3383	9.57013	-1.92182	protein_coding	Down
ENSBTAG00000003017	TTC38	6.87268	6.52505	2.86312	protein_coding	Up
ENSBTAG00000003033	GADD45G	8.9294	9.13101	-1.6723	protein_coding	Down
ENSBTAG00000003039	PSMB8	7.29191	7.49369	-1.67365	protein_coding	Down
ENSBTAG00000003049	MICALL2	7.05393	6.80781	2.02491	protein_coding	Up
ENSBTAG00000003074	SLC16A6	11.5086	11.0464	3.8087	protein_coding	Up
ENSBTAG00000003083	SLC50A1	5.66742	5.88837	-1.83197	protein_coding	Down
ENSBTAG00000003137	PLPPR1	5.53344	5.91832	-3.18562	protein_coding	Down
ENSBTAG00000003152	IFI27	6.65993	6.87768	-1.80548	protein_coding	Down
ENSBTAG00000003169	FBXO24	5.39564	5.16639	1.88554	protein_coding	Up
ENSBTAG00000003172	MEIS2	4.65652	4.84602	-1.57228	protein_coding	Down
ENSBTAG00000003193	RPUSD2	5.80476	6.11161	-2.54125	protein_coding	Down
ENSBTAG00000003222	ASNS	9.59802	9.23926	2.95502	protein_coding	Up
ENSBTAG00000003232	RAB29	5.56127	5.87191	-2.57256	protein_coding	Down
ENSBTAG00000003253	NPPC	5.58574	5.3357	2.05721	protein_coding	Up
ENSBTAG00000003257	STK4	5.40143	5.62021	-1.81414	protein_coding	Down
ENSBTAG00000003326	NAIP	4.74212	5.00068	-2.14254	protein_coding	Down
ENSBTAG00000003328	TAMM41	6.42607	6.65188	-1.8721	protein_coding	Down
ENSBTAG00000003334	ADAP2	5.165	5.48057	-2.61329	protein_coding	Down
ENSBTAG00000003336	TPD52L1	6.43222	5.96654	3.83788	protein_coding	Up
ENSBTAG00000003362	HSP90B1	10.8347	11.1061	-2.24851	protein_coding	Down
ENSBTAG00000003375	TC2N	5.13339	5.32834	-1.61732	protein_coding	Down
ENSBTAG00000003378	ACAP2	4.89021	5.07778	-1.55634	protein_coding	Down
ENSBTAG00000003403	PADI2	12.5078	12.207	2.47667	protein_coding	Up
ENSBTAG00000003410	EFL1	9.07755	9.26228	-1.53285	protein_coding	Down
ENSBTAG00000003438	ZBTB43	6.70135	6.47597	1.85354	protein_coding	Up
ENSBTAG00000003458	CDCA7	5.49626	5.89845	-3.32862	protein_coding	Down
ENSBTAG00000003474	RAB15	7.17456	6.86109	2.58106	protein_coding	Up
ENSBTAG00000003526	SYNE3	6.63424	6.44092	1.58883	protein_coding	Up
ENSBTAG00000003649	POMK	8.21662	8.01297	1.6741	protein_coding	Up
ENSBTAG00000003650	NR4A2	5.11897	5.34477	-1.87209	protein_coding	Down
ENSBTAG00000003651	OTOP1	5.52247	5.20464	2.61706	protein_coding	Up
ENSBTAG00000003675	ADGRL1	9.03162	8.82982	1.65888	protein_coding	Up
ENSBTAG00000003692	UCP2	9.75894	9.5359	1.83425	protein_coding	Up
ENSBTAG00000003779	ZC4H2	6.10538	5.86181	2.00381	protein_coding	Up
ENSBTAG00000003800	LRRC27	5.18264	4.9674	1.76992	protein_coding	Up
ENSBTAG00000003815	EDEM2	6.29018	6.47339	-1.5203	protein_coding	Down
ENSBTAG00000003822	CROCC	7.61073	7.40991	1.65083	protein_coding	Up
ENSBTAG00000003848	ATRN	6.68745	6.50272	1.51792	protein_coding	Up
ENSBTAG00000003863	PCED1A	6.95169	7.16829	-1.79606	protein_coding	Down
ENSBTAG00000003885	PEX2	7.17849	7.35938	-1.50115	protein_coding	Down
ENSBTAG00000003919	KIAA0408	6.47629	7.01367	-4.44485	protein_coding	Down
ENSBTAG00000003937		5.07355	5.27579	-1.67744	protein_coding	Down
ENSBTAG00000003959	ARHGAP24	7.76245	7.98243	-1.82395	protein_coding	Down
ENSBTAG00000004017	PLEKHG2	6.94129	6.75707	1.51374	protein_coding	Up
ENSBTAG00000004036	GJC1	5.41302	5.19156	1.82128	protein_coding	Up
ENSBTAG00000004046	DTX4	7.98239	8.45782	-3.93338	protein_coding	Down
ENSBTAG00000004048	MCHR1	6.87678	6.65298	1.8405	protein_coding	Up
ENSBTAG00000004118	ALAS1	11.5895	11.3864	1.66986	protein_coding	Up
ENSBTAG00000004155	SPATA20	7.27025	7.47665	-1.71182	protein_coding	Down
ENSBTAG00000004172	SETD1B	6.94412	6.71877	1.85338	protein_coding	Up
ENSBTAG00000004256	ODC1	9.84053	10.0855	-2.03031	protein_coding	Down
ENSBTAG00000004286	CDC45	6.78514	6.59237	1.58432	protein_coding	Up
ENSBTAG00000004318	ARL3	6.82316	6.6089	1.7618	protein_coding	Up
ENSBTAG00000004322	FOS	6.92146	7.25526	-2.76379	protein_coding	Down
ENSBTAG00000004329	RELL1	6.78273	7.08606	-2.51227	protein_coding	Down
ENSBTAG00000004383	FNBP1L	7.05078	6.85237	1.63097	protein_coding	Up
ENSBTAG00000004399	LRRN3	4.75721	5.04479	-2.38214	protein_coding	Down
ENSBTAG00000004401	UGGT2	5.34557	5.10121	2.01032	protein_coding	Up
ENSBTAG00000004475	CDK5R1	5.42379	5.13277	2.3956	protein_coding	Up
ENSBTAG00000004476	ADHFE1	6.38665	6.70371	-2.62557	protein_coding	Down
ENSBTAG00000004494	B4GALNT1	4.90576	4.68194	1.84071	protein_coding	Up
ENSBTAG00000004574	UGT8	5.58917	5.1509	3.61158	protein_coding	Up
ENSBTAG00000004587	DUSP6	6.69709	6.90243	-1.70308	protein_coding	Down
ENSBTAG00000004602	PITX1	5.62451	5.41401	1.73073	protein_coding	Up
ENSBTAG00000004662	SLC16A12	4.70118	4.88846	-1.5539	protein_coding	Down
ENSBTAG00000004679	WARS1	10.3585	10.6222	-2.18508	protein_coding	Down
ENSBTAG00000004685	SRGAP3	4.66911	4.85223	-1.51964	protein_coding	Down
ENSBTAG00000004718	PUS7L	6.40737	6.66862	-2.16483	protein_coding	Down
ENSBTAG00000004727	PAQR4	7.89202	7.36608	4.33545	protein_coding	Up
ENSBTAG00000004729	PKMYT1	6.82785	6.46579	2.98227	protein_coding	Up
ENSBTAG00000004751	SPTBN4	5.23811	4.91485	2.66179	protein_coding	Up
ENSBTAG00000004777	S100B	9.1258	8.88362	1.99237	protein_coding	Up
ENSBTAG00000004787	METRNL	7.15756	6.95419	1.6719	protein_coding	Up
ENSBTAG00000004802	CEP170B	5.47494	5.11951	2.92754	protein_coding	Up
ENSBTAG00000004815		6.51177	6.91641	-3.34879	protein_coding	Down
ENSBTAG00000004822	SOX10	5.60627	5.30359	2.49193	protein_coding	Up
ENSBTAG00000004849	IGSF3	6.70865	6.51188	1.6173	protein_coding	Up
ENSBTAG00000004860	SLC27A6	6.45326	6.24895	1.67963	protein_coding	Up
ENSBTAG00000004862	TUB	5.21849	5.40283	-1.52971	protein_coding	Down
ENSBTAG00000004881	MTHFD2	7.00358	6.7487	2.09724	protein_coding	Up
ENSBTAG00000004896	ABLIM3	8.10094	7.88619	1.76583	protein_coding	Up
ENSBTAG00000004899	ABLIM1	7.06627	6.86574	1.64843	protein_coding	Up
ENSBTAG00000004908	CHRNE	8.91895	8.69482	1.84327	protein_coding	Up
ENSBTAG00000004956	CHEK2	6.31267	6.12073	1.57741	protein_coding	Up
ENSBTAG00000004974	ZDHHC23	5.45052	5.22729	1.83588	protein_coding	Up
ENSBTAG00000005012	HSPH1	9.15231	9.4881	-2.78026	protein_coding	Down
ENSBTAG00000005017	ZNF169	5.21969	5.02486	1.60136	protein_coding	Up
ENSBTAG00000005063	THEM6	6.48427	6.26805	1.77791	protein_coding	Up
ENSBTAG00000005078	UCHL1	5.36763	5.64081	-2.26329	protein_coding	Down
ENSBTAG00000005093	CES2	7.08594	6.75709	2.70806	protein_coding	Up
ENSBTAG00000005124	JADE3	5.77132	6.01747	-2.04001	protein_coding	Down
ENSBTAG00000005138	BCL9L	8.75793	8.48589	2.23897	protein_coding	Up
ENSBTAG00000005144	PNPLA2	10.3606	10.0528	2.53477	protein_coding	Up
ENSBTAG00000005145	PEAK1	6.16853	5.96893	1.64071	protein_coding	Up
ENSBTAG00000005146		6.32325	6.5931	-2.23571	protein_coding	Down
ENSBTAG00000005152		6.27513	6.52787	-2.09448	protein_coding	Down
ENSBTAG00000005163	S100A1	7.50891	7.92519	-3.44496	protein_coding	Down
ENSBTAG00000005259	UCP3	9.57315	9.32195	2.06687	protein_coding	Up
ENSBTAG00000005275	PKIG	9.18194	8.97414	1.70841	protein_coding	Up
ENSBTAG00000005278	WEE1	7.02744	7.2135	-1.54387	protein_coding	Down
ENSBTAG00000005312	MED26	7.14435	6.91044	1.92407	protein_coding	Up
ENSBTAG00000005313	EPHB3	5.3539	5.03542	2.62237	protein_coding	Up
ENSBTAG00000005359	TGFB2	6.40874	6.62671	-1.80741	protein_coding	Down
ENSBTAG00000005390	GMFG	4.94715	5.22731	-2.32083	protein_coding	Down
ENSBTAG00000005395		4.52026	4.72647	-1.71031	protein_coding	Down
ENSBTAG00000005432	CAPG	5.55205	5.73835	-1.54579	protein_coding	Down
ENSBTAG00000005436	SHQ1	7.31872	7.11068	1.71042	protein_coding	Up
ENSBTAG00000005464	ADCY6	9.55286	9.34319	1.72392	protein_coding	Up
ENSBTAG00000005474	CREB1	6.29988	6.09336	1.69789	protein_coding	Up
ENSBTAG00000005482	TMEM135	7.17223	7.36498	-1.59907	protein_coding	Down
ENSBTAG00000005504	TP53INP2	8.93162	8.55599	3.09425	protein_coding	Up
ENSBTAG00000005523	XYLT1	5.13865	4.93166	1.70171	protein_coding	Up
ENSBTAG00000005524	HBP1	8.37957	8.66627	-2.37491	protein_coding	Down
ENSBTAG00000005583	HYI	6.70922	6.91359	-1.69501	protein_coding	Down
ENSBTAG00000005615	CEACAM1	8.13175	7.93227	1.63975	protein_coding	Up
ENSBTAG00000005663	HAUS2	7.45696	7.2274	1.88811	protein_coding	Up
ENSBTAG00000005667		5.1552	4.91724	1.95748	protein_coding	Up
ENSBTAG00000005670	ARHGEF19	5.13853	4.94897	1.55782	protein_coding	Up
ENSBTAG00000005672	CDH22	5.31867	4.94269	3.09714	protein_coding	Up
ENSBTAG00000005710	NCAM1	6.50043	6.24883	2.07008	protein_coding	Up
ENSBTAG00000005718	PLIN2	7.11529	7.31064	-1.62055	protein_coding	Down
ENSBTAG00000005723	NEPRO	5.92719	6.11188	-1.53251	protein_coding	Down
ENSBTAG00000005743	SMN2	7.21883	7.42387	-1.70062	protein_coding	Down
ENSBTAG00000005744	COQ2	8.50858	8.76503	-2.12509	protein_coding	Down
ENSBTAG00000005748	SOX17	6.67308	6.47132	1.65858	protein_coding	Up
ENSBTAG00000005751	CDAN1	8.00312	7.82039	1.50141	protein_coding	Up
ENSBTAG00000005761	DEDD2	6.32054	6.52147	-1.6666	protein_coding	Down
ENSBTAG00000005766	IL4I1	5.02213	4.75338	2.21177	protein_coding	Up
ENSBTAG00000005787	IFT57	6.46131	6.21805	2.00123	protein_coding	Up
ENSBTAG00000005810	PDZK1	5.33155	4.99572	2.76566	protein_coding	Up
ENSBTAG00000005812	TP73	5.56502	5.29331	2.2362	protein_coding	Up
ENSBTAG00000005842	ABCC10	7.58277	7.39331	1.55698	protein_coding	Up
ENSBTAG00000005870	FANCL	5.92963	6.15859	-1.89813	protein_coding	Down
ENSBTAG00000005897	FNTB	8.93875	8.68896	2.05519	protein_coding	Up
ENSBTAG00000005932	FAM184B	7.07246	7.47854	-3.36074	protein_coding	Down
ENSBTAG00000005946	USP13	10.2858	10.1009	1.51954	protein_coding	Up
ENSBTAG00000005985	CBLN2	4.57833	4.77233	-1.60941	protein_coding	Down
ENSBTAG00000005998	NOCT	8.90476	8.69062	1.7608	protein_coding	Up
ENSBTAG00000006016	GTPBP2	8.69507	8.42879	2.19138	protein_coding	Up
ENSBTAG00000006026	BEX3	6.4108	6.68234	-2.24975	protein_coding	Down
ENSBTAG00000006030	MYOG	10.1107	9.69366	3.43608	protein_coding	Up
ENSBTAG00000006039	ARHGDIB	7.5422	7.72403	-1.50894	protein_coding	Down
ENSBTAG00000006065	PCNA	8.45346	8.6563	-1.68243	protein_coding	Down
ENSBTAG00000006103	XRCC6	7.95394	8.15484	-1.66644	protein_coding	Down
ENSBTAG00000006111	EXOC8	6.69494	6.47249	1.82941	protein_coding	Up
ENSBTAG00000006139	TRPM4	7.26042	6.97881	2.31796	protein_coding	Up
ENSBTAG00000006158	DZIP3	6.66805	6.45056	1.78846	protein_coding	Up
ENSBTAG00000006161	MET	7.93115	8.17434	-2.01566	protein_coding	Down
ENSBTAG00000006165	PRDX4	8.16218	8.35586	-1.6068	protein_coding	Down
ENSBTAG00000006232	WDR86	7.26327	6.93756	2.68207	protein_coding	Up
ENSBTAG00000006233	NIM1K	5.09328	4.90737	1.52766	protein_coding	Up
ENSBTAG00000006276	C1QTNF1	6.89998	7.08913	-1.56943	protein_coding	Down
ENSBTAG00000006326	ALDH1L2	6.71447	6.21644	4.10499	protein_coding	Up
ENSBTAG00000006335	STAT6	7.10348	6.89229	1.73639	protein_coding	Up
ENSBTAG00000006370	CCT3	11.1805	11.3686	-1.56093	protein_coding	Down
ENSBTAG00000006383		6.69167	8.03855	-11.1293	protein_coding	Down
ENSBTAG00000006404	CENPT	5.94251	5.64132	2.47961	protein_coding	Up
ENSBTAG00000006432	KCNE4	4.78402	5.02575	-2.00358	protein_coding	Down
ENSBTAG00000006466	CD53	4.81941	5.10957	-2.4035	protein_coding	Down
ENSBTAG00000006471	OSBPL11	8.62656	8.28748	2.79245	protein_coding	Up
ENSBTAG00000006474	EPCAM	5.05329	4.7468	2.52336	protein_coding	Up
ENSBTAG00000006505	S100A9	5.09383	5.38611	-2.42097	protein_coding	Down
ENSBTAG00000006525	FDXR	7.28798	7.0921	1.61001	protein_coding	Up
ENSBTAG00000006563	KLHL40	11.1987	11.0051	1.59133	protein_coding	Up
ENSBTAG00000006608	GGT5	6.01874	5.73319	2.35047	protein_coding	Up
ENSBTAG00000006610	XRRA1	4.77444	4.98635	-1.75734	protein_coding	Down
ENSBTAG00000006625	NDC1	5.90977	5.6741	1.9386	protein_coding	Up
ENSBTAG00000006686	NPNT	7.66255	7.33193	2.72261	protein_coding	Up
ENSBTAG00000006694	CXCL14	6.23155	6.04018	1.57274	protein_coding	Up
ENSBTAG00000006730	SUSD2	4.69656	4.90598	-1.73677	protein_coding	Down
ENSBTAG00000006731	SLC7A5	6.18475	5.56986	5.06996	protein_coding	Up
ENSBTAG00000006738	GPR68	4.9765	5.18127	-1.69831	protein_coding	Down
ENSBTAG00000006752	PFKFB4	10.4137	10.0922	2.64751	protein_coding	Up
ENSBTAG00000006754	DBP	6.82002	7.06449	-2.02619	protein_coding	Down
ENSBTAG00000006780	NAPSA	4.90457	5.18594	-2.33089	protein_coding	Down
ENSBTAG00000006800	FGF6	5.0262	4.82941	1.61752	protein_coding	Up
ENSBTAG00000006864		6.31522	6.53095	-1.78895	protein_coding	Down
ENSBTAG00000006918	TLK1	7.23899	7.44933	-1.74438	protein_coding	Down
ENSBTAG00000006921	ABCA6	6.85467	6.59966	2.09828	protein_coding	Up
ENSBTAG00000006977	PLP1	6.98029	6.70067	2.30152	protein_coding	Up
ENSBTAG00000007079	LCP1	5.89514	6.13472	-1.98582	protein_coding	Down
ENSBTAG00000007115	GSR	6.8481	7.11012	-2.17115	protein_coding	Down
ENSBTAG00000007116	ARRDC3	8.53816	9.02177	-4.00091	protein_coding	Down
ENSBTAG00000007121	TK1	7.20302	7.39793	-1.61694	protein_coding	Down
ENSBTAG00000007125	AFMID	5.13201	5.35763	-1.87049	protein_coding	Down
ENSBTAG00000007129	IRAG1	8.15135	7.94018	1.73627	protein_coding	Up
ENSBTAG00000007148	F2	4.84553	4.60255	1.99895	protein_coding	Up
ENSBTAG00000007164	FGFR3	4.66302	4.88419	-1.83386	protein_coding	Down
ENSBTAG00000007173	PDGFRA	7.86193	8.08187	-1.82357	protein_coding	Down
ENSBTAG00000007220	CASKIN2	9.40169	9.21798	1.50948	protein_coding	Up
ENSBTAG00000007312	CD209	4.74538	4.94522	-1.6577	protein_coding	Down
ENSBTAG00000007325	TPSB2	4.90629	5.19499	-2.3914	protein_coding	Down
ENSBTAG00000007334	NFKBID	5.87506	5.63541	1.97147	protein_coding	Up
ENSBTAG00000007352	KCNC4	8.1785	8.57223	-3.25864	protein_coding	Down
ENSBTAG00000007363	LSM3	7.60514	7.8892	-2.35318	protein_coding	Down
ENSBTAG00000007369	PDLIM2	4.84006	4.65056	1.55736	protein_coding	Up
ENSBTAG00000007378	CLIP4	9.45901	9.24802	1.73477	protein_coding	Up
ENSBTAG00000007379	ALK	6.08219	5.82575	2.11008	protein_coding	Up
ENSBTAG00000007417	GDF11	5.67333	5.89254	-1.81753	protein_coding	Down
ENSBTAG00000007444	MAP3K7CL	7.26885	6.91147	2.94362	protein_coding	Up
ENSBTAG00000007462	ASTE1	5.68678	5.87591	-1.56917	protein_coding	Down
ENSBTAG00000007492	ADAMTSL2	6.3117	6.09821	1.75544	protein_coding	Up
ENSBTAG00000007506	CACNG7	4.94731	4.73175	1.77251	protein_coding	Up
ENSBTAG00000007507	FAAH	6.20167	5.9889	1.74948	protein_coding	Up
ENSBTAG00000007510	PXMP2	7.58595	7.86561	-2.31681	protein_coding	Down
ENSBTAG00000007531	NCF4	5.52323	5.26031	2.16353	protein_coding	Up
ENSBTAG00000007599	IKBKB	7.72275	7.47895	2.00568	protein_coding	Up
ENSBTAG00000007611	NRIP2	5.89668	6.08297	-1.54576	protein_coding	Down
ENSBTAG00000007624	FRMD4B	6.31566	6.59968	-2.35276	protein_coding	Down
ENSBTAG00000007636	IRAK3	5.6556	5.86851	-1.7656	protein_coding	Down
ENSBTAG00000007662	HSPA5	11.0389	11.3228	-2.35114	protein_coding	Down
ENSBTAG00000007666	IGF2BP2	5.81396	6.09812	-2.35391	protein_coding	Down
ENSBTAG00000007714	ZNF235	6.58661	6.35922	1.87023	protein_coding	Up
ENSBTAG00000007718	TGIF1	5.57863	5.85463	-2.28651	protein_coding	Down
ENSBTAG00000007719	MFSD6	5.21543	5.019	1.6146	protein_coding	Up
ENSBTAG00000007763	SLC1A4	7.91935	7.67169	2.03759	protein_coding	Up
ENSBTAG00000007807	HSPA2	7.38675	7.19772	1.55348	protein_coding	Up
ENSBTAG00000007820		4.74339	5.00754	-2.18869	protein_coding	Down
ENSBTAG00000007884	SREBF1	10.8921	10.7042	1.54375	protein_coding	Up
ENSBTAG00000007895	SLC20A1	8.10771	7.88041	1.86948	protein_coding	Up
ENSBTAG00000007896	NAGPA	5.72013	5.91331	-1.60265	protein_coding	Down
ENSBTAG00000008022	PTGFRN	7.70952	7.47566	1.92361	protein_coding	Up
ENSBTAG00000008026	OXT	6.70523	7.02601	-2.65631	protein_coding	Down
ENSBTAG00000008028	CHN1	8.07086	8.27828	-1.72021	protein_coding	Down
ENSBTAG00000008034	LMAN2	9.44771	9.63071	-1.51858	protein_coding	Down
ENSBTAG00000008057	PARVG	4.91545	4.69334	1.8266	protein_coding	Up
ENSBTAG00000008088	KIF18B	5.34179	5.07092	2.22927	protein_coding	Up
ENSBTAG00000008091	SELENBP1	6.75511	6.96459	-1.73726	protein_coding	Down
ENSBTAG00000008121	RSPO3	6.41706	6.79005	-3.08747	protein_coding	Down
ENSBTAG00000008192	PLPPR2	8.73373	8.49766	1.94188	protein_coding	Up
ENSBTAG00000008197	EPOR	5.52331	5.29599	1.8696	protein_coding	Up
ENSBTAG00000008227	LIPT2	6.2419	6.00673	1.9345	protein_coding	Up
ENSBTAG00000008240	GALNT15	5.14809	4.95702	1.57031	protein_coding	Up
ENSBTAG00000008250	SPRY4	6.1057	5.92051	1.52176	protein_coding	Up
ENSBTAG00000008271	MEDAG	5.59505	5.81131	-1.79326	protein_coding	Down
ENSBTAG00000008291	PROCR	5.75525	5.98583	-1.91148	protein_coding	Down
ENSBTAG00000008294	KCNJ2	9.62217	9.40664	1.77223	protein_coding	Up
ENSBTAG00000008313	KLF15	6.75103	7.05649	-2.52975	protein_coding	Down
ENSBTAG00000008333	ETV4	6.14144	5.84917	2.40598	protein_coding	Up
ENSBTAG00000008353	CDKN1A	9.70688	9.02312	5.63868	protein_coding	Up
ENSBTAG00000008366	STAC2	5.22586	4.98539	1.97818	protein_coding	Up
ENSBTAG00000008382	METTL25	5.26604	5.56525	-2.47821	protein_coding	Down
ENSBTAG00000008385	KLHL36	6.58544	6.37627	1.71968	protein_coding	Up
ENSBTAG00000008394	MYL3	13.2246	12.9472	2.28268	protein_coding	Up
ENSBTAG00000008406	TREX1	5.56544	5.79902	-1.93628	protein_coding	Down
ENSBTAG00000008448	MEIS1	6.88393	7.08197	-1.64282	protein_coding	Down
ENSBTAG00000008471	MX2	5.31515	5.66183	-2.87018	protein_coding	Down
ENSBTAG00000008487	VPS37D	5.16602	4.96859	1.62283	protein_coding	Up
ENSBTAG00000008497	RGS14	8.65114	8.19172	3.78626	protein_coding	Up
ENSBTAG00000008501	FOXD3	6.47763	6.19	2.36765	protein_coding	Up
ENSBTAG00000008535	SOCS7	6.65156	6.43633	1.76985	protein_coding	Up
ENSBTAG00000008545	ATF3	7.61961	7.2166	3.32042	protein_coding	Up
ENSBTAG00000008552	PLXNA3	5.98847	6.22649	-1.9729	protein_coding	Down
ENSBTAG00000008553	B4GALNT3	5.62378	5.30624	2.61458	protein_coding	Up
ENSBTAG00000008554	NINJ2	4.88162	5.13697	-2.11606	protein_coding	Down
ENSBTAG00000008564		4.92517	4.69463	1.89622	protein_coding	Up
ENSBTAG00000008567	DLEC1	4.98401	4.58971	3.24847	protein_coding	Up
ENSBTAG00000008636	PDE4B	8.51664	8.25274	2.17171	protein_coding	Up
ENSBTAG00000008661	C15H11orf52	6.32921	6.03667	2.40816	protein_coding	Up
ENSBTAG00000008714	CLSTN2	5.10943	4.9213	1.54606	protein_coding	Up
ENSBTAG00000008721	MANSC1	5.60921	5.79378	-1.53159	protein_coding	Down
ENSBTAG00000008764	SMYD5	6.56904	6.79658	-1.88633	protein_coding	Down
ENSBTAG00000008792	RNASE6	5.24702	5.44348	-1.62979	protein_coding	Down
ENSBTAG00000008798	DRC3	5.42934	5.61038	-1.50244	protein_coding	Down
ENSBTAG00000008800	XKR8	5.2129	5.01321	1.64147	protein_coding	Up
ENSBTAG00000008827	SPOCK2	9.32684	8.99204	2.75716	protein_coding	Up
ENSBTAG00000008835	GPANK1	8.94378	9.15878	-1.78282	protein_coding	Down
ENSBTAG00000008849	SORT1	8.49965	8.26594	1.9224	protein_coding	Up
ENSBTAG00000008913	TMEM98	5.66594	6.06676	-3.3172	protein_coding	Down
ENSBTAG00000008940	NPTX1	4.68925	4.37845	2.55895	protein_coding	Up
ENSBTAG00000008954	PSMB9	5.9768	6.23535	-2.14251	protein_coding	Down
ENSBTAG00000009029		7.16155	7.37115	-1.73821	protein_coding	Down
ENSBTAG00000009055	RNF144B	9.3557	9.5912	-1.95216	protein_coding	Down
ENSBTAG00000009075	RNF207	8.50141	8.1443	2.94135	protein_coding	Up
ENSBTAG00000009101	SH2B3	6.45607	6.17524	2.31143	protein_coding	Up
ENSBTAG00000009110		5.37141	5.55443	-1.51876	pseudogene	Down
ENSBTAG00000009148	GPA33	5.76951	5.34342	3.51091	protein_coding	Up
ENSBTAG00000009150	SPON1	6.61295	6.21846	3.25001	protein_coding	Up
ENSBTAG00000009153	MLXIPL	8.06406	7.72503	2.79208	protein_coding	Up
ENSBTAG00000009177	PLEKHA4	6.70911	6.52531	1.51025	protein_coding	Up
ENSBTAG00000009190	SLC2A4	11.1064	10.9106	1.60934	protein_coding	Up
ENSBTAG00000009199	GLIS2	7.18263	6.97849	1.67827	protein_coding	Up
ENSBTAG00000009201	CORO7	6.86349	6.65057	1.75078	protein_coding	Up
ENSBTAG00000009213	TOMM40L	8.83911	9.07663	-1.96877	protein_coding	Down
ENSBTAG00000009218	ANLN	5.72506	5.50225	1.8324	protein_coding	Up
ENSBTAG00000009265	NR5A2	5.26664	5.03028	1.94426	protein_coding	Up
ENSBTAG00000009288	TBC1D25	6.85394	6.61061	2.00184	protein_coding	Up
ENSBTAG00000009359		5.3097	5.49632	-1.54855	protein_coding	Down
ENSBTAG00000009401	MTRR	7.19236	6.96782	1.84673	protein_coding	Up
ENSBTAG00000009417	ZFAND5	11.2309	11.4266	-1.62314	protein_coding	Down
ENSBTAG00000009461	STYXL1	7.08374	7.31905	-1.95058	protein_coding	Down
ENSBTAG00000009472	C4H7orf25	7.21533	7.40208	-1.5496	protein_coding	Down
ENSBTAG00000009482	AFF4	8.15563	7.9423	1.75409	protein_coding	Up
ENSBTAG00000009507	PHETA2	5.94258	6.1943	-2.08606	protein_coding	Down
ENSBTAG00000009513	TGFBI	7.02799	7.27454	-2.04342	protein_coding	Down
ENSBTAG00000009523	SLC9A6	6.16819	5.95511	1.75207	protein_coding	Up
ENSBTAG00000009545	PPEF1	5.91785	5.70528	1.74783	protein_coding	Up
ENSBTAG00000009599		6.67028	5.73806	7.69037	protein_coding	Up
ENSBTAG00000009620	WDR27	5.42191	5.11825	2.49999	protein_coding	Up
ENSBTAG00000009655	TNS3	6.7455	6.55127	1.59645	protein_coding	Up
ENSBTAG00000009656		5.47965	6.29047	-6.70284	protein_coding	Down
ENSBTAG00000009658	PLEK	5.69557	5.87633	-1.50011	protein_coding	Down
ENSBTAG00000009691	SH2B2	6.08846	6.32855	-1.99	protein_coding	Down
ENSBTAG00000009702	MYH8	7.84158	7.64914	1.58155	protein_coding	Up
ENSBTAG00000009749	USP2	11.0395	10.7643	2.2652	protein_coding	Up
ENSBTAG00000009830	PLEKHB1	6.92861	6.6657	2.16345	protein_coding	Up
ENSBTAG00000009844	CCN1	8.16785	8.85665	-5.69527	protein_coding	Down
ENSBTAG00000009845	ITPK1	7.07479	6.87856	1.61293	protein_coding	Up
ENSBTAG00000009852	NAV3	5.55481	5.74103	-1.54519	protein_coding	Down
ENSBTAG00000009861	FRS3	6.44856	6.65712	-1.72962	protein_coding	Down
ENSBTAG00000009982	IGSF8	8.58362	8.36331	1.81174	protein_coding	Up
ENSBTAG00000010018	ATP7A	7.51207	7.77164	-2.15081	protein_coding	Down
ENSBTAG00000010023	FAM107B	5.62545	5.92971	-2.51992	protein_coding	Down
ENSBTAG00000010042	RIOK3	9.49876	9.6822	-1.52224	protein_coding	Down
ENSBTAG00000010096	SLC5A2	5.26744	5.57997	-2.58822	protein_coding	Down
ENSBTAG00000010100	MED20	5.36764	5.60047	-1.93012	protein_coding	Down
ENSBTAG00000010164	ESPNL	6.94772	6.69744	2.05918	protein_coding	Up
ENSBTAG00000010207	NUDT21	7.2874	7.48507	-1.63974	protein_coding	Down
ENSBTAG00000010371	CHAC1	7.71913	7.45262	2.19319	protein_coding	Up
ENSBTAG00000010392	ESRRG	5.5944	5.39556	1.63448	protein_coding	Up
ENSBTAG00000010419	CYP2R1	6.76439	6.95119	-1.55004	protein_coding	Down
ENSBTAG00000010422	MDM2	9.64214	9.44856	1.59101	protein_coding	Up
ENSBTAG00000010452	PODXL	7.46472	7.24915	1.77259	protein_coding	Up
ENSBTAG00000010482	PITPNM1	6.01226	5.82866	1.50864	protein_coding	Up
ENSBTAG00000010493	SERTAD1	8.0362	7.84468	1.57398	protein_coding	Up
ENSBTAG00000010502	SERTAD3	8.94785	8.58301	3.00525	protein_coding	Up
ENSBTAG00000010549	IFRD1	8.4138	8.08592	2.69994	protein_coding	Up
ENSBTAG00000010551	ATP1A2	13.4573	13.2684	1.55221	protein_coding	Up
ENSBTAG00000010564	ELOVL6	5.50292	5.75038	-2.05089	protein_coding	Down
ENSBTAG00000010606	PPP1R3B	9.67986	9.39296	2.36164	protein_coding	Up
ENSBTAG00000010609	STK31	5.04585	5.31598	-2.23807	protein_coding	Down
ENSBTAG00000010610	DDIT4L	11.5872	11.892	-2.52502	protein_coding	Down
ENSBTAG00000010637	ARSG	9.63878	9.36513	2.2522	protein_coding	Up
ENSBTAG00000010645	BOLA-DRA	8.51292	8.8693	-2.95031	protein_coding	Down
ENSBTAG00000010698	VARS2	8.05916	8.31666	-2.13382	protein_coding	Down
ENSBTAG00000010738	CCL14	8.74602	8.92913	-1.51948	protein_coding	Down
ENSBTAG00000010774	NUSAP1	5.85765	5.62183	1.93981	protein_coding	Up
ENSBTAG00000010820	WNT11	7.38254	7.17151	1.73508	protein_coding	Up
ENSBTAG00000010877	ARMC12	6.66554	6.26587	3.29282	protein_coding	Up
ENSBTAG00000010913	SRXN1	5.33447	5.11925	1.76969	protein_coding	Up
ENSBTAG00000010927	CBFA2T3	9.05005	8.65608	3.24569	protein_coding	Up
ENSBTAG00000010943	SLC22A23	7.06485	7.25828	-1.60474	protein_coding	Down
ENSBTAG00000011007	TTYH2	7.02948	6.78554	2.00682	protein_coding	Up
ENSBTAG00000011052		5.75869	5.99326	-1.94447	protein_coding	Down
ENSBTAG00000011079	C18H19orf48	6.86692	7.09588	-1.89814	protein_coding	Down
ENSBTAG00000011095	FAR2	5.16538	5.42878	-2.18251	protein_coding	Down
ENSBTAG00000011103	SLC8B1	5.71271	5.45107	2.15305	protein_coding	Up
ENSBTAG00000011156	ATP8A1	8.36695	8.17684	1.56239	protein_coding	Up
ENSBTAG00000011173	FAM189A2	9.48006	9.80824	-2.71746	protein_coding	Down
ENSBTAG00000011182	PDLIM1	10.2519	10.513	-2.16356	protein_coding	Down
ENSBTAG00000011185	TTC23	7.72461	7.51485	1.72455	protein_coding	Up
ENSBTAG00000011193	C1QC	5.66824	5.89889	-1.91211	protein_coding	Down
ENSBTAG00000011207	CNN1	7.66098	7.89874	-1.9708	protein_coding	Down
ENSBTAG00000011224	CITED2	8.26621	8.65369	-3.20714	protein_coding	Down
ENSBTAG00000011227	TRPC6	4.56682	4.90576	-2.80628	protein_coding	Down
ENSBTAG00000011241	HPDL	8.85776	8.54596	2.56723	protein_coding	Up
ENSBTAG00000011244	TESK2	6.13299	6.41065	-2.30022	protein_coding	Down
ENSBTAG00000011420	CA9	4.9285	4.65854	2.22171	protein_coding	Up
ENSBTAG00000011437		7.51119	7.21677	2.42376	protein_coding	Up
ENSBTAG00000011444	HINT2	8.13066	8.34721	-1.79565	protein_coding	Down
ENSBTAG00000011461	ADORA1	5.02045	4.83091	1.55773	protein_coding	Up
ENSBTAG00000011463	MID1IP1	9.45715	9.80214	-2.85621	protein_coding	Down
ENSBTAG00000011465	MYBPH	13.1666	12.7612	3.33978	protein_coding	Up
ENSBTAG00000011483	SCARF1	11.0559	10.718	2.78266	protein_coding	Up
ENSBTAG00000011498	ZNF184	6.28445	6.478	-1.60572	protein_coding	Down
ENSBTAG00000011511		5.42741	5.67456	-2.04838	protein_coding	Down
ENSBTAG00000011515	SELL	5.2612	5.45221	-1.58474	protein_coding	Down
ENSBTAG00000011545	GDA	4.83946	5.03839	-1.65014	protein_coding	Down
ENSBTAG00000011580	DAG1	11.5171	11.3039	1.75298	protein_coding	Up
ENSBTAG00000011617	MAMSTR	9.95999	9.71096	2.0489	protein_coding	Up
ENSBTAG00000011658	PTPN18	5.87168	5.63053	1.98384	protein_coding	Up
ENSBTAG00000011661	CEP152	4.80664	4.98853	-1.50942	protein_coding	Down
ENSBTAG00000011662	SOX18	7.69615	7.50324	1.58546	protein_coding	Up
ENSBTAG00000011680	PAPLN	5.30502	5.11012	1.60192	protein_coding	Up
ENSBTAG00000011727	ETAA1	8.1578	8.33958	-1.50853	protein_coding	Down
ENSBTAG00000011731	PNMT	8.18903	8.43645	-2.0505	protein_coding	Down
ENSBTAG00000011733	GIPC2	6.89698	6.6969	1.64467	protein_coding	Up
ENSBTAG00000011734	ANKRD1	11.6477	11.2311	3.4326	protein_coding	Up
ENSBTAG00000011742	TNIK	7.27633	7.50078	-1.86089	protein_coding	Down
ENSBTAG00000011762	ANKRD52	8.10687	7.87643	1.8954	protein_coding	Up
ENSBTAG00000011798	STK38L	6.61695	6.39619	1.81545	protein_coding	Up
ENSBTAG00000011803	MYH3	10.2129	10.0183	1.59935	protein_coding	Up
ENSBTAG00000011815	SMG9	7.1812	6.96583	1.77088	protein_coding	Up
ENSBTAG00000011820	DAPK2	7.78425	7.4907	2.41649	protein_coding	Up
ENSBTAG00000011866	PCBD1	6.70778	6.92103	-1.76842	protein_coding	Down
ENSBTAG00000011869	CSRP3	13.0035	13.273	-2.23338	protein_coding	Down
ENSBTAG00000011908	CPQ	4.85787	5.04112	-1.52067	protein_coding	Down
ENSBTAG00000011912	SLC25A25	11.2066	10.8533	2.91031	protein_coding	Up
ENSBTAG00000011924	CFAP73	4.78235	4.97309	-1.5825	protein_coding	Down
ENSBTAG00000011934	PCK2	6.96204	6.52268	3.62054	protein_coding	Up
ENSBTAG00000011937	RITA1	7.40668	7.12491	2.31925	protein_coding	Up
ENSBTAG00000011975	SERPINB1	7.90401	7.69417	1.7253	protein_coding	Up
ENSBTAG00000012003	PPIA	10.716	10.9798	-2.18605	protein_coding	Down
ENSBTAG00000012007	SOCS2	7.9123	8.10963	-1.6369	protein_coding	Down
ENSBTAG00000012019	IRS2	5.88195	6.08303	-1.66788	protein_coding	Down
ENSBTAG00000012036	HR	9.31456	9.05941	2.09947	protein_coding	Up
ENSBTAG00000012046	JUNB	7.46532	7.2543	1.73506	protein_coding	Up
ENSBTAG00000012078	TMEM176A	5.78238	6.13628	-2.92976	protein_coding	Down
ENSBTAG00000012082	TNFRSF12A	9.11026	8.83551	2.26126	protein_coding	Up
ENSBTAG00000012088	FBLN1	7.14051	7.35808	-1.80405	protein_coding	Down
ENSBTAG00000012106	ADCK1	5.6151	5.94412	-2.72433	protein_coding	Down
ENSBTAG00000012172	MIDN	8.0229	7.79699	1.85803	protein_coding	Up
ENSBTAG00000012193	TTC28	7.06089	7.2549	-1.60949	protein_coding	Down
ENSBTAG00000012222	FA2H	4.95619	4.66613	2.38769	protein_coding	Up
ENSBTAG00000012273	FAM131A	7.69222	7.5028	1.55667	protein_coding	Up
ENSBTAG00000012284	CLCN2	5.18371	4.99646	1.53873	protein_coding	Up
ENSBTAG00000012285	ESRRB	6.91033	6.67653	1.92317	protein_coding	Up
ENSBTAG00000012319	KCNE5	7.70166	7.36046	2.80999	protein_coding	Up
ENSBTAG00000012322	INKA1	7.1158	6.92618	1.55838	protein_coding	Up
ENSBTAG00000012330	B2M	10.1279	10.342	-1.775	protein_coding	Down
ENSBTAG00000012338	FAH	6.15687	6.405	-2.05639	protein_coding	Down
ENSBTAG00000012372	TMEM53	5.27645	5.09076	1.52584	protein_coding	Up
ENSBTAG00000012377	ECHDC3	9.82117	10.0937	-2.25753	protein_coding	Down
ENSBTAG00000012409	POSTN	6.16926	6.55336	-3.17923	protein_coding	Down
ENSBTAG00000012444	ADAM12	4.56602	4.8057	-1.98664	protein_coding	Down
ENSBTAG00000012451	BOLA-DMB	6.89803	7.15665	-2.14309	protein_coding	Down
ENSBTAG00000012454	SLC35A3	6.62078	6.86098	-1.99094	protein_coding	Down
ENSBTAG00000012505	ARHGEF17	7.85347	7.65214	1.65501	protein_coding	Up
ENSBTAG00000012526	APBB1IP	4.74909	5.1082	-2.97289	protein_coding	Down
ENSBTAG00000012555	RBM15	7.59141	7.37507	1.77894	protein_coding	Up
ENSBTAG00000012577	UVSSA	6.93135	6.64498	2.3572	protein_coding	Up
ENSBTAG00000012604	NCMAP	5.14073	4.90192	1.96451	protein_coding	Up
ENSBTAG00000012605	GPR157	7.33842	7.02521	2.57886	protein_coding	Up
ENSBTAG00000012608	GDAP1	8.43546	8.69283	-2.13268	protein_coding	Down
ENSBTAG00000012636	IKZF4	5.72054	5.53366	1.53568	protein_coding	Up
ENSBTAG00000012638	S100A12	5.3381	5.52434	-1.54534	protein_coding	Down
ENSBTAG00000012659	LRIF1	7.2753	7.49602	-1.83003	protein_coding	Down
ENSBTAG00000012674	CNKSR3	7.01332	7.36443	-2.90682	protein_coding	Down
ENSBTAG00000012720	ANKRD2	11.279	11.5566	-2.29912	protein_coding	Down
ENSBTAG00000012761	PTK7	6.5538	6.35178	1.66072	protein_coding	Up
ENSBTAG00000012771	CSF1R	5.19231	5.3906	-1.64481	protein_coding	Down
ENSBTAG00000012804	REEP5	11.0609	10.8615	1.6385	protein_coding	Up
ENSBTAG00000012834	ARSI	6.03452	5.71744	2.61086	protein_coding	Up
ENSBTAG00000012837	COL6A6	5.54186	5.75478	-1.76569	protein_coding	Down
ENSBTAG00000012849	COL4A1	12.2323	12.0022	1.89304	protein_coding	Up
ENSBTAG00000012885	ACAT1	11.3264	11.532	-1.70551	protein_coding	Down
ENSBTAG00000012888	C2H2orf80	5.88036	5.67198	1.71318	protein_coding	Up
ENSBTAG00000012927	ALDOA	17.2601	17.4476	-1.55529	protein_coding	Down
ENSBTAG00000012969	DKK2	7.97624	7.4053	4.70707	protein_coding	Up
ENSBTAG00000012987	ULK1	9.94381	9.74886	1.60226	protein_coding	Up
ENSBTAG00000012991	PRUNE2	5.55462	5.84289	-2.38784	protein_coding	Down
ENSBTAG00000012992	CDH6	4.60054	4.95174	-2.90754	protein_coding	Down
ENSBTAG00000012997	SMPDL3B	5.0111	4.74148	2.21894	protein_coding	Up
ENSBTAG00000013015	CCDC13	5.0464	4.82204	1.84513	protein_coding	Up
ENSBTAG00000013029	ARNTL	6.7308	6.44383	2.36218	protein_coding	Up
ENSBTAG00000013050	ZNF277	7.13091	7.46922	-2.80107	protein_coding	Down
ENSBTAG00000013065	HFE	6.40007	6.09807	2.48637	protein_coding	Up
ENSBTAG00000013081	PSPH	8.81102	8.48947	2.6477	protein_coding	Up
ENSBTAG00000013108	HK2	9.44493	9.1594	2.35027	protein_coding	Up
ENSBTAG00000013109	STIM1	10.6996	10.5162	1.50729	protein_coding	Up
ENSBTAG00000013116	PLCB4	9.07116	8.80158	2.21856	protein_coding	Up
ENSBTAG00000013118	CD86	5.20323	5.41718	-1.77413	protein_coding	Down
ENSBTAG00000013152	NIPSNAP1	6.89741	7.32878	-3.56949	protein_coding	Down
ENSBTAG00000013162	HSPA8	13.8951	14.255	-2.97913	protein_coding	Down
ENSBTAG00000013167	SIGLEC1	4.97859	4.79492	1.50919	protein_coding	Up
ENSBTAG00000013178	ALAS2	5.0454	5.34125	-2.45048	protein_coding	Down
ENSBTAG00000013183	COL23A1	5.5197	5.78189	-2.17257	protein_coding	Down
ENSBTAG00000013210	ADAMTS4	5.49716	5.22587	2.23271	protein_coding	Up
ENSBTAG00000013215	MREG	5.83138	5.62513	1.69556	protein_coding	Up
ENSBTAG00000013222	CD109	7.30339	7.62475	-2.66114	protein_coding	Down
ENSBTAG00000013225	NBN	8.36811	8.61761	-2.06771	protein_coding	Down
ENSBTAG00000013240	SLC3A2	10.7595	10.5284	1.90051	protein_coding	Up
ENSBTAG00000013245	ITPR3	6.4876	6.21109	2.27579	protein_coding	Up
ENSBTAG00000013254	XPO1	9.46094	9.6962	-1.95017	protein_coding	Down
ENSBTAG00000013273	PIGL	7.11158	7.44374	-2.75024	protein_coding	Down
ENSBTAG00000013284	SGK3	6.62873	6.9329	-2.51915	protein_coding	Down
ENSBTAG00000013306	ZBTB7C	6.05388	6.32558	-2.25099	protein_coding	Down
ENSBTAG00000013317	RNF168	8.29733	8.00395	2.41516	protein_coding	Up
ENSBTAG00000013357	PUM3	7.6554	7.84944	-1.60979	protein_coding	Down
ENSBTAG00000013401	ARHGEF40	8.23281	7.90284	2.71733	protein_coding	Up
ENSBTAG00000013407	PLXNB1	6.19939	5.97287	1.86303	protein_coding	Up
ENSBTAG00000013426	SETD9	5.70694	6.05882	-2.91315	protein_coding	Down
ENSBTAG00000013475	TRAF3	6.824	7.05593	-1.92264	protein_coding	Down
ENSBTAG00000013492	PRKAG3	9.89744	9.64135	2.10723	protein_coding	Up
ENSBTAG00000013513	ATP6V1C1	10.0759	9.84046	1.93634	protein_coding	Up
ENSBTAG00000013555	ACVR1B	6.36631	6.06882	2.449	protein_coding	Up
ENSBTAG00000013556	UNC13D	5.07338	5.28509	-1.75565	protein_coding	Down
ENSBTAG00000013577	SLC1A5	6.9886	6.74898	1.97117	protein_coding	Up
ENSBTAG00000013612	MBLAC2	8.06708	8.25673	-1.57349	protein_coding	Down
ENSBTAG00000013629	GET1	6.61625	6.81645	-1.66065	protein_coding	Down
ENSBTAG00000013650	SLC66A1	7.33483	7.07955	2.10049	protein_coding	Up
ENSBTAG00000013665	KCNG2	5.28086	5.50366	-1.84726	protein_coding	Down
ENSBTAG00000013676	DYNC2LI1	5.66985	5.46742	1.66415	protein_coding	Up
ENSBTAG00000013699	TBC1D1	7.40584	7.62581	-1.8239	protein_coding	Down
ENSBTAG00000013716	NR2C2	7.15935	6.93394	1.85384	protein_coding	Up
ENSBTAG00000013717	PRAP1	5.46115	5.2067	2.09362	protein_coding	Up
ENSBTAG00000013793	NEDD4	7.64179	7.84041	-1.64754	protein_coding	Down
ENSBTAG00000013806	EFHB	7.19077	7.39456	-1.69027	protein_coding	Down
ENSBTAG00000013836		4.98393	5.19662	-1.76376	protein_coding	Down
ENSBTAG00000013837	TUBE1	5.80507	6.02543	-1.82708	protein_coding	Down
ENSBTAG00000013861	SLC8A1	5.22534	4.96281	2.16036	protein_coding	Up
ENSBTAG00000013919		8.44023	8.77068	-2.73622	protein_coding	Down
ENSBTAG00000013932	CCDC71	7.48677	7.23144	2.1009	protein_coding	Up
ENSBTAG00000013958	PAK4	7.86851	7.66295	1.68997	protein_coding	Up
ENSBTAG00000014027	TRIM36	5.51116	5.70156	-1.57972	protein_coding	Down
ENSBTAG00000014031	TLR6	4.80825	4.9985	-1.57848	protein_coding	Down
ENSBTAG00000014069	PDK4	12.0331	12.3313	-2.47	protein_coding	Down
ENSBTAG00000014089	PPCDC	6.77257	6.55611	1.77992	protein_coding	Up
ENSBTAG00000014096	PCNX4	6.31511	6.53197	-1.79818	protein_coding	Down
ENSBTAG00000014132	SNED1	6.5743	6.3356	1.9636	protein_coding	Up
ENSBTAG00000014140	ATP1B3	7.28292	7.47897	-1.62643	protein_coding	Down
ENSBTAG00000014233	CCT8	11.0571	11.2472	-1.57749	protein_coding	Down
ENSBTAG00000014246	CENPH	4.82959	5.06562	-1.95651	protein_coding	Down
ENSBTAG00000014284	ALPK2	9.52084	9.76539	-2.02681	protein_coding	Down
ENSBTAG00000014286	IFT88	6.08754	6.30189	-1.77746	protein_coding	Down
ENSBTAG00000014328	MGC138914	8.73488	8.38786	2.85808	protein_coding	Up
ENSBTAG00000014375	TMCC3	5.21226	5.0272	1.52065	protein_coding	Up
ENSBTAG00000014389	SP4	6.08999	5.85594	1.92517	protein_coding	Up
ENSBTAG00000014405	OSBPL6	7.15987	6.93036	1.88771	protein_coding	Up
ENSBTAG00000014430	CDC26	6.17358	5.98299	1.56632	protein_coding	Up
ENSBTAG00000014438	SS18L1	7.12305	6.88269	1.97735	protein_coding	Up
ENSBTAG00000014466	VTCN1	5.24515	4.91508	2.71803	protein_coding	Up
ENSBTAG00000014506	ZNF503	8.28481	8.01239	2.24202	protein_coding	Up
ENSBTAG00000014511	C16H1orf159	6.1707	6.35854	-1.55864	protein_coding	Down
ENSBTAG00000014525	SLC6A13	5.16613	5.52381	-2.96101	protein_coding	Down
ENSBTAG00000014540	PERM1	11.9837	11.7801	1.6733	protein_coding	Up
ENSBTAG00000014583	CALM3	13.4248	13.6076	-1.51689	protein_coding	Down
ENSBTAG00000014648	RPN2	9.53055	9.71296	-1.51377	protein_coding	Down
ENSBTAG00000014655	MYO1A	5.79794	5.57247	1.85441	protein_coding	Up
ENSBTAG00000014676	SHROOM1	5.1416	4.93359	1.71017	protein_coding	Up
ENSBTAG00000014707	ISG15	5.71096	5.93658	-1.87055	protein_coding	Down
ENSBTAG00000014724	EIF4A2	12.5833	12.808	-1.86289	protein_coding	Down
ENSBTAG00000014737	VEGFC	6.06122	6.33535	-2.27107	protein_coding	Down
ENSBTAG00000014749	ZIC4	5.85061	6.04264	-1.59315	protein_coding	Down
ENSBTAG00000014791	CTH	6.15271	5.79951	2.9091	protein_coding	Up
ENSBTAG00000014799	ARMC7	7.07805	6.86926	1.7166	protein_coding	Up
ENSBTAG00000014818	MYLK3	7.8727	7.64148	1.90188	protein_coding	Up
ENSBTAG00000014824	MMP14	7.57701	7.34525	1.9063	protein_coding	Up
ENSBTAG00000014849	GPATCH3	5.81	6.00007	-1.57698	protein_coding	Down
ENSBTAG00000014855	MICAL2	7.23612	6.99733	1.9643	protein_coding	Up
ENSBTAG00000014862		8.35494	9.06672	-5.88507	protein_coding	Down
ENSBTAG00000014881	PHF23	8.10616	7.89188	1.76195	protein_coding	Up
ENSBTAG00000014903	ABCA3	6.72518	6.50793	1.78651	protein_coding	Up
ENSBTAG00000014907	IL11RA	8.77019	8.96865	-1.64624	protein_coding	Down
ENSBTAG00000014915	ETV5	7.14563	6.82605	2.63142	protein_coding	Up
ENSBTAG00000014968	YJEFN3	5.78901	5.97601	-1.55162	protein_coding	Down
ENSBTAG00000015013	C2CD2L	7.13824	6.92744	1.73323	protein_coding	Up
ENSBTAG00000015016	CALCOCO1	9.76208	9.52739	1.93044	protein_coding	Up
ENSBTAG00000015024	GXYLT1	5.36034	5.65781	-2.46391	protein_coding	Down
ENSBTAG00000015032	CD14	5.21183	4.96105	2.06328	protein_coding	Up
ENSBTAG00000015050	HCN2	6.68182	6.49116	1.56696	protein_coding	Up
ENSBTAG00000015058	CDH4	5.71036	5.51345	1.61846	protein_coding	Up
ENSBTAG00000015060	GBP5	4.79007	5.07088	-2.32629	protein_coding	Down
ENSBTAG00000015066	LANCL1	10.4381	11.043	-5.00228	protein_coding	Down
ENSBTAG00000015094	VNN1	7.20643	6.93202	2.2585	protein_coding	Up
ENSBTAG00000015114	CALR	10.8484	11.0307	-1.51266	protein_coding	Down
ENSBTAG00000015127	SDC4	7.22309	7.02457	1.63176	protein_coding	Up
ENSBTAG00000015129	KLK10	5.5254	5.27165	2.08784	protein_coding	Up
ENSBTAG00000015142	MAPKBP1	6.89651	6.62619	2.22465	protein_coding	Up
ENSBTAG00000015165	DPY19L3	5.30249	5.48712	-1.53206	protein_coding	Down
ENSBTAG00000015177	PRSS23	6.87973	6.67079	1.71789	protein_coding	Up
ENSBTAG00000015214	CA3	12.9137	13.3408	-3.53397	protein_coding	Down
ENSBTAG00000015228	CD74	10.5299	10.7257	-1.62424	protein_coding	Down
ENSBTAG00000015352	MTMR4	8.15192	8.39626	-2.02509	protein_coding	Down
ENSBTAG00000015358	ALDOB	5.15754	5.36871	-1.75118	protein_coding	Down
ENSBTAG00000015369	MLLT11	7.70461	8.1173	-3.41524	protein_coding	Down
ENSBTAG00000015406	ZNF750	7.54058	7.21184	2.70709	protein_coding	Up
ENSBTAG00000015413	RASA2	5.2696	5.07808	1.57402	protein_coding	Up
ENSBTAG00000015450	CPEB3	9.38183	9.13164	2.05844	protein_coding	Up
ENSBTAG00000015516	CCDC28A	6.18499	5.92214	2.163	protein_coding	Up
ENSBTAG00000015537	RASAL2	5.56528	5.77158	-1.71101	protein_coding	Down
ENSBTAG00000015569	ENKUR	4.62932	4.85216	-1.84758	protein_coding	Down
ENSBTAG00000015578	SAP30	6.13261	6.35355	-1.83195	protein_coding	Down
ENSBTAG00000015590	CILK1	7.30231	7.56178	-2.15003	protein_coding	Down
ENSBTAG00000015604	ZNF385A	8.54715	8.74081	-1.6066	protein_coding	Down
ENSBTAG00000015655	APBB1	6.58558	6.35464	1.89947	protein_coding	Up
ENSBTAG00000015663	STIP1	11.2362	11.4649	-1.89593	protein_coding	Down
ENSBTAG00000015702	PITX3	6.78093	6.99257	-1.75504	protein_coding	Down
ENSBTAG00000015711	BTG2	6.89516	6.52352	3.06141	protein_coding	Up
ENSBTAG00000015727	IFI47	4.95121	6.00016	-8.66915	protein_coding	Down
ENSBTAG00000015730	BOLA-DMA	7.07243	7.33228	-2.15319	protein_coding	Down
ENSBTAG00000015750	AMN	5.02978	4.68775	2.81684	protein_coding	Up
ENSBTAG00000015751	MEOX1	6.0243	6.24852	-1.85899	protein_coding	Down
ENSBTAG00000015753	RSBN1L	7.22288	7.41782	-1.61715	protein_coding	Down
ENSBTAG00000015778	SASS6	5.68787	5.90576	-1.8067	protein_coding	Down
ENSBTAG00000015786	LRRC39	11.2135	11.452	-1.97703	protein_coding	Down
ENSBTAG00000015794	NES	10.5018	10.6891	-1.55459	protein_coding	Down
ENSBTAG00000015860	FGD1	5.92168	6.14371	-1.84084	protein_coding	Down
ENSBTAG00000015878	RHNO1	6.05263	5.86655	1.52913	protein_coding	Up
ENSBTAG00000015879	TULP3	8.02677	7.65767	3.04038	protein_coding	Up
ENSBTAG00000015905	ARHGAP32	5.33904	5.12525	1.75794	protein_coding	Up
ENSBTAG00000015911	RWDD2A	5.54411	5.87739	-2.75951	protein_coding	Down
ENSBTAG00000015950	ISOC2	9.3452	9.72747	-3.16404	protein_coding	Down
ENSBTAG00000015955	ERGIC1	9.48845	9.72794	-1.98503	protein_coding	Down
ENSBTAG00000015976	PHF12	8.67958	8.45737	1.8274	protein_coding	Up
ENSBTAG00000015986	NDE1	7.68669	7.95935	-2.25896	protein_coding	Down
ENSBTAG00000015991	CDH1	6.07989	5.64315	3.59891	protein_coding	Up
ENSBTAG00000016014	NUP42	6.15403	5.96782	1.53019	protein_coding	Up
ENSBTAG00000016026	PCOLCE2	6.62127	6.88657	-2.1982	protein_coding	Down
ENSBTAG00000016038	GCC2	7.08609	7.29587	-1.73971	protein_coding	Down
ENSBTAG00000016060	CREM	7.43052	6.87301	4.59618	protein_coding	Up
ENSBTAG00000016063	DNER	7.55574	6.6106	7.79707	protein_coding	Up
ENSBTAG00000016078	STXBP4	5.71233	5.94071	-1.8933	protein_coding	Down
ENSBTAG00000016139	TMEM120A	8.73858	8.94414	-1.70487	protein_coding	Down
ENSBTAG00000016144	LCN10	4.45095	4.74215	-2.41212	protein_coding	Down
ENSBTAG00000016148		4.69654	4.89419	-1.63958	lncRNA	Down
ENSBTAG00000016169	ID1	8.35914	7.9286	3.54775	protein_coding	Up
ENSBTAG00000016175	SPNS3	4.88036	4.61696	2.16755	protein_coding	Up
ENSBTAG00000016177	FGL1	7.47355	7.13575	2.78186	protein_coding	Up
ENSBTAG00000016194	FBXO32	6.86183	7.15683	-2.44339	protein_coding	Down
ENSBTAG00000016206	MAOA	6.00948	5.77564	1.92347	protein_coding	Up
ENSBTAG00000016265	DNAJA1	9.86149	10.0986	-1.96579	protein_coding	Down
ENSBTAG00000016336	OGA	9.49068	9.26459	1.85952	protein_coding	Up
ENSBTAG00000016357	VNN2	6.40755	6.2162	1.57262	protein_coding	Up
ENSBTAG00000016377	IPP	8.43178	8.65978	-1.89019	protein_coding	Down
ENSBTAG00000016450	CDNF	10.0123	10.2775	-2.19692	protein_coding	Down
ENSBTAG00000016451	HSPA14	9.03018	9.21233	-1.51159	protein_coding	Down
ENSBTAG00000016473	NAT1	6.9653	7.19166	-1.8766	protein_coding	Down
ENSBTAG00000016505	TMC7	4.72095	4.94597	-1.86552	protein_coding	Down
ENSBTAG00000016507	SERHL2	5.50919	5.72218	-1.76626	protein_coding	Down
ENSBTAG00000016533	FOXP1	7.18202	7.37475	-1.5989	protein_coding	Down
ENSBTAG00000016546	PARP12	6.1479	6.33846	-1.58097	protein_coding	Down
ENSBTAG00000016609	DQX1	4.93529	4.71486	1.81281	protein_coding	Up
ENSBTAG00000016615	ABHD6	5.58987	5.90589	-2.61703	protein_coding	Down
ENSBTAG00000016625	TMEM131L	7.64115	7.8484	-1.71888	protein_coding	Down
ENSBTAG00000016650	TIGAR	8.16002	7.91699	1.99933	protein_coding	Up
ENSBTAG00000016656	PARP14	6.61147	6.80109	-1.57332	protein_coding	Down
ENSBTAG00000016667	ZBTB46	6.33734	6.14876	1.54971	protein_coding	Up
ENSBTAG00000016688		8.15589	8.41524	-2.14909	protein_coding	Down
ENSBTAG00000016709	NT5C3A	9.15058	9.58921	-3.62942	protein_coding	Down
ENSBTAG00000016711	PPIF	8.1327	7.90206	1.89701	protein_coding	Up
ENSBTAG00000016724	NPEPL1	9.69365	9.90011	-1.71231	protein_coding	Down
ENSBTAG00000016728	PLEKHG5	6.60995	6.42501	1.51972	protein_coding	Up
ENSBTAG00000016751	MYO6	5.96868	5.75324	1.77154	protein_coding	Up
ENSBTAG00000016754	KLHL38	7.25111	7.88554	-5.24631	protein_coding	Down
ENSBTAG00000016765	C7orf61	5.93061	6.21672	-2.37001	protein_coding	Down
ENSBTAG00000016804	LYST	7.22288	6.99791	1.85022	protein_coding	Up
ENSBTAG00000016805	SGMS2	4.98421	4.78487	1.63861	protein_coding	Up
ENSBTAG00000016826	GPR176	5.35574	5.13469	1.81786	protein_coding	Up
ENSBTAG00000016886	MT3	5.44812	5.75251	-2.52099	protein_coding	Down
ENSBTAG00000016903	NLN	6.34726	6.55043	-1.6852	protein_coding	Down
ENSBTAG00000016911	ARHGAP23	7.80726	7.59127	1.77599	protein_coding	Up
ENSBTAG00000016933	IL27RA	6.94718	6.74632	1.65113	protein_coding	Up
ENSBTAG00000016958	PHF19	5.92067	5.71468	1.69353	protein_coding	Up
ENSBTAG00000016973	PRSS8	5.25524	5.44844	-1.60278	protein_coding	Down
ENSBTAG00000017011	CCDC125	5.17072	5.38184	-1.75074	protein_coding	Down
ENSBTAG00000017016	H3-5	5.25112	5.04382	1.7043	protein_coding	Up
ENSBTAG00000017024	PPARGC1A	8.7655	8.98759	-1.84142	protein_coding	Down
ENSBTAG00000017071	C1QTNF3	7.35155	7.63352	-2.33582	protein_coding	Down
ENSBTAG00000017086	GRB10	8.94784	9.13893	-1.58537	protein_coding	Down
ENSBTAG00000017116	RASD2	6.41944	6.22141	1.62772	protein_coding	Up
ENSBTAG00000017143	PDIA4	8.69698	8.88059	-1.52367	protein_coding	Down
ENSBTAG00000017160	TBC1D7	7.21976	7.41349	-1.60718	protein_coding	Down
ENSBTAG00000017215	WDR76	5.75281	5.9438	-1.58458	protein_coding	Down
ENSBTAG00000017268	PROCA1	4.81059	4.99463	-1.52712	protein_coding	Down
ENSBTAG00000017281	OPLAH	9.10354	8.87066	1.91555	protein_coding	Up
ENSBTAG00000017326	OMA1	6.76656	6.95093	-1.52995	protein_coding	Down
ENSBTAG00000017330		4.99372	5.30107	-2.5454	protein_coding	Down
ENSBTAG00000017333	PRX	7.42043	7.06416	2.93448	protein_coding	Up
ENSBTAG00000017335	HGFAC	4.78448	4.99217	-1.72248	protein_coding	Down
ENSBTAG00000017338	FAM205C	5.01519	4.77392	1.98478	protein_coding	Up
ENSBTAG00000017354	MPP7	7.80487	7.60968	1.60428	protein_coding	Up
ENSBTAG00000017369	MAMDC2	4.7263	4.97304	-2.04493	protein_coding	Down
ENSBTAG00000017397	ZNF423	7.0409	7.24956	-1.73051	protein_coding	Down
ENSBTAG00000017419	ZZZ3	7.86358	8.05854	-1.61739	protein_coding	Down
ENSBTAG00000017421	SLC3A1	5.85764	5.66259	1.6032	protein_coding	Up
ENSBTAG00000017429	PREPL	9.12686	8.78171	2.84254	protein_coding	Up
ENSBTAG00000017435	KCTD7	6.06405	5.85399	1.72708	protein_coding	Up
ENSBTAG00000017439	MIEF1	8.65855	8.44066	1.79179	protein_coding	Up
ENSBTAG00000017461	SLC16A3	11.513	11.3168	1.61282	protein_coding	Up
ENSBTAG00000017468	NUCB2	6.25893	6.51459	-2.11864	protein_coding	Down
ENSBTAG00000017486	ADARB1	6.92498	6.73011	1.60169	protein_coding	Up
ENSBTAG00000017524	CBLN4	8.84146	9.16112	-2.64709	protein_coding	Down
ENSBTAG00000017566	TUFT1	5.21822	5.44052	-1.84312	protein_coding	Down
ENSBTAG00000017567	ACACA	6.95416	7.24191	-2.38354	protein_coding	Down
ENSBTAG00000017592	GPAT3	7.70841	7.48769	1.81509	protein_coding	Up
ENSBTAG00000017599	NR2F1	5.39398	5.16067	1.91909	protein_coding	Up
ENSBTAG00000017624	RAB17	5.37071	5.15546	1.76991	protein_coding	Up
ENSBTAG00000017632	AEN	6.25556	5.9975	2.12344	protein_coding	Up
ENSBTAG00000017652	NUP50	7.59803	7.39911	1.63511	protein_coding	Up
ENSBTAG00000017655	PALMD	10.0118	10.2922	-2.32333	protein_coding	Down
ENSBTAG00000017661	RFX2	5.91052	5.58391	2.6895	protein_coding	Up
ENSBTAG00000017691	KIAA0040	5.49793	5.22083	2.28064	protein_coding	Up
ENSBTAG00000017709	ATRNL1	5.53088	5.22768	2.49617	protein_coding	Up
ENSBTAG00000017721	EEF1AKNMT	6.87149	7.07077	-1.653	protein_coding	Down
ENSBTAG00000017738	EMID1	5.92481	5.70575	1.80138	protein_coding	Up
ENSBTAG00000017739	TNK1	4.91701	4.53804	3.12188	protein_coding	Up
ENSBTAG00000017746	SLIT3	5.96948	5.78287	1.53345	protein_coding	Up
ENSBTAG00000017748	RNF44	7.53866	7.73947	-1.66563	protein_coding	Down
ENSBTAG00000017826	SCLY	7.27201	7.52486	-2.09542	protein_coding	Down
ENSBTAG00000017850	ARHGEF6	8.7159	8.52099	1.60204	protein_coding	Up
ENSBTAG00000017856	TSTD1	7.06538	6.84054	1.84918	protein_coding	Up
ENSBTAG00000017883	LRRC38	4.92688	5.15199	-1.86632	protein_coding	Down
ENSBTAG00000017925	LMF2	8.39048	8.18372	1.69985	protein_coding	Up
ENSBTAG00000017956	KCTD15	9.26802	9.52624	-2.13972	protein_coding	Down
ENSBTAG00000017969	CA4	6.5538	6.14337	3.3817	protein_coding	Up
ENSBTAG00000018046	B3GNT2	6.33992	6.60526	-2.19854	protein_coding	Down
ENSBTAG00000018062	KIAA1522	6.16452	6.35979	-1.61995	protein_coding	Down
ENSBTAG00000018201	TKFC	7.01883	7.23567	-1.79811	protein_coding	Down
ENSBTAG00000018204	MYH1	17.6473	17.2015	3.67414	protein_coding	Up
ENSBTAG00000018223	CHI3L1	8.07936	7.49085	4.85221	protein_coding	Up
ENSBTAG00000018227	SLC4A7	9.4087	9.12734	2.31585	protein_coding	Up
ENSBTAG00000018249	KCNN3	7.47166	7.20926	2.15924	protein_coding	Up
ENSBTAG00000018289	TMEM150A	5.87283	5.68795	1.51916	protein_coding	Up
ENSBTAG00000018352	ABRA	8.29005	8.041	2.04905	protein_coding	Up
ENSBTAG00000018387	EIPR1	8.0134	8.23066	-1.8015	protein_coding	Down
ENSBTAG00000018390	GLB1L2	8.55498	7.93523	5.11013	protein_coding	Up
ENSBTAG00000018394	SDR42E1	4.54636	4.84057	-2.43695	protein_coding	Down
ENSBTAG00000018399	MYH15	5.00831	5.52535	-4.27695	protein_coding	Down
ENSBTAG00000018402	TSC22D2	8.861	8.67565	1.52298	protein_coding	Up
ENSBTAG00000018413	TENT5B	6.04322	5.81839	1.84907	protein_coding	Up
ENSBTAG00000018417	PSMF1	8.1819	8.3955	-1.7713	protein_coding	Down
ENSBTAG00000018453	ANKRD37	4.93273	5.3353	-3.33172	protein_coding	Down
ENSBTAG00000018460	ADAMTS16	5.17415	5.35921	-1.53563	protein_coding	Down
ENSBTAG00000018495	NKX6-3	5.14945	5.34617	-1.63192	protein_coding	Down
ENSBTAG00000018520	SCN1A	6.22348	6.03563	1.54375	protein_coding	Up
ENSBTAG00000018528	USP45	6.27817	6.06746	1.73248	protein_coding	Up
ENSBTAG00000018538	CEP70	6.21101	6.39494	-1.52624	protein_coding	Down
ENSBTAG00000018548	INTS7	7.53281	7.31667	1.77731	protein_coding	Up
ENSBTAG00000018566	SFRP5	6.59523	6.21676	3.1178	protein_coding	Up
ENSBTAG00000018589	RFC2	7.78776	7.5052	2.32576	protein_coding	Up
ENSBTAG00000018638	CC2D2A	5.14322	5.37482	-1.91991	protein_coding	Down
ENSBTAG00000018661	TMC6	6.72905	6.36608	2.98977	protein_coding	Up
ENSBTAG00000018669	PLB1	6.11728	5.83931	2.28787	protein_coding	Up
ENSBTAG00000018671	DCUN1D2	10.0963	10.3062	-1.74101	protein_coding	Down
ENSBTAG00000018689	LIG3	8.56784	8.37405	1.59277	protein_coding	Up
ENSBTAG00000018691	RHOU	6.61199	6.26761	2.83627	protein_coding	Up
ENSBTAG00000018704	BTG3	6.7144	6.9	-1.54004	protein_coding	Down
ENSBTAG00000018768	HMGN1	9.18642	9.44814	-2.16864	protein_coding	Down
ENSBTAG00000018777	ADCY5	5.59665	5.83082	-1.94109	protein_coding	Down
ENSBTAG00000018806	PSRC1	5.39161	5.61507	-1.85277	protein_coding	Down
ENSBTAG00000018838	IQCA1L	6.87348	6.6904	1.50435	protein_coding	Up
ENSBTAG00000018873	TTPAL	5.58969	5.34103	2.04582	protein_coding	Up
ENSBTAG00000018940	CRACR2A	4.97099	4.78456	1.532	protein_coding	Up
ENSBTAG00000018942	SSX2IP	6.43165	6.70922	-2.29952	protein_coding	Down
ENSBTAG00000019017		5.45994	5.73932	-2.31445	protein_coding	Down
ENSBTAG00000019018		4.14678	5.24043	-9.0383	protein_coding	Down
ENSBTAG00000019067	TMC8	5.28423	5.05531	1.88288	protein_coding	Up
ENSBTAG00000019076	PAK6	5.31666	5.07316	2.00325	protein_coding	Up
ENSBTAG00000019081	COL7A1	5.88672	5.6688	1.79196	pseudogene	Up
ENSBTAG00000019090	PLEKHH3	9.38751	9.03827	2.87635	protein_coding	Up
ENSBTAG00000019110	PNRC1	9.4647	9.91726	-3.74453	protein_coding	Down
ENSBTAG00000019146	OSBP2	7.35164	7.13232	1.8036	protein_coding	Up
ENSBTAG00000019153	JMJD6	8.18396	7.93899	2.01532	protein_coding	Up
ENSBTAG00000019159	PVALB	5.0315	5.31353	-2.33634	protein_coding	Down
ENSBTAG00000019164	RHOBTB1	9.3013	9.51346	-1.75934	protein_coding	Down
ENSBTAG00000019166	NSMCE4A	7.87819	8.16191	-2.35031	protein_coding	Down
ENSBTAG00000019182	TIA1	6.92017	7.10647	-1.54582	protein_coding	Down
ENSBTAG00000019213	CNNM4	7.25122	6.94984	2.48117	protein_coding	Up
ENSBTAG00000019289	ITGA2	4.88984	5.10939	-1.8204	protein_coding	Down
ENSBTAG00000019293	EGR3	5.29703	5.09021	1.70033	protein_coding	Up
ENSBTAG00000019310	FOXK1	6.35217	6.06489	2.36477	protein_coding	Up
ENSBTAG00000019347	PLXDC1	6.82991	7.0162	-1.54577	protein_coding	Down
ENSBTAG00000019349	SLC6A4	4.98455	4.70942	2.26438	protein_coding	Up
ENSBTAG00000019373	CAPRIN2	6.0026	5.81326	1.556	protein_coding	Up
ENSBTAG00000019386	BOLA-NC1	7.42775	7.62615	-1.64575	protein_coding	Down
ENSBTAG00000019410	CEP57L1	5.94605	6.16926	-1.85065	protein_coding	Down
ENSBTAG00000019434	PDCD4	7.83046	8.13055	-2.48542	protein_coding	Down
ENSBTAG00000019445	C4H7orf31	4.96873	4.72896	1.97243	protein_coding	Up
ENSBTAG00000019453	PTGES	4.97478	4.69779	2.27975	protein_coding	Up
ENSBTAG00000019457	MRPL22	8.48383	8.67205	-1.56167	protein_coding	Down
ENSBTAG00000019472	NR3C1	10.0284	10.2525	-1.85787	protein_coding	Down
ENSBTAG00000019588	BLA-DQB	7.66077	7.92827	-2.21637	protein_coding	Down
ENSBTAG00000019658	ASB16	10.3408	10.1453	1.60658	protein_coding	Up
ENSBTAG00000019667	RNF187	9.06142	9.24751	-1.54407	protein_coding	Down
ENSBTAG00000019669	CD163	5.72929	5.5261	1.6704	protein_coding	Up
ENSBTAG00000019675	ATXN1	7.127	6.88529	1.9884	protein_coding	Up
ENSBTAG00000019694	ADAM23	4.8395	4.5279	2.56555	protein_coding	Up
ENSBTAG00000019707	GATA2	6.93885	6.67954	2.13373	protein_coding	Up
ENSBTAG00000019767	MIER2	6.73604	6.54469	1.5726	protein_coding	Up
ENSBTAG00000019770	APOA4	5.03533	4.65271	3.15201	protein_coding	Up
ENSBTAG00000019801		5.54152	5.26572	2.26994	protein_coding	Up
ENSBTAG00000019807	COL27A1	6.37211	6.5824	-1.7439	protein_coding	Down
ENSBTAG00000019847	CPEB2	6.47014	6.27672	1.58968	protein_coding	Up
ENSBTAG00000019886	BORA	6.93262	6.65698	2.26865	protein_coding	Up
ENSBTAG00000019942	PABPC5	4.59268	4.91862	-2.69891	protein_coding	Down
ENSBTAG00000019949	DBR1	6.91703	6.69602	1.81754	protein_coding	Up
ENSBTAG00000019979	CMPK2	6.13233	5.89757	1.93105	protein_coding	Up
ENSBTAG00000019984	GINS1	5.39491	5.57799	-1.51927	protein_coding	Down
ENSBTAG00000020000	RAP1GAP2	5.8516	6.03406	-1.51416	protein_coding	Down
ENSBTAG00000020053	ZEB1	8.60259	8.78885	-1.54553	protein_coding	Down
ENSBTAG00000020060	TXNIP	12.2185	12.5526	-2.76677	protein_coding	Down
ENSBTAG00000020062	TMC4	6.13371	5.9461	1.54176	protein_coding	Up
ENSBTAG00000020067	LLGL2	6.85683	7.04398	-1.5528	protein_coding	Down
ENSBTAG00000020097	PERP	4.9501	4.66379	2.35669	protein_coding	Up
ENSBTAG00000020116	JSP.1	9.22166	9.03802	1.50888	protein_coding	Up
ENSBTAG00000020126	MYO10	8.79463	8.54148	2.08294	protein_coding	Up
ENSBTAG00000020130	CLCN3	8.71856	8.52341	1.604	protein_coding	Up
ENSBTAG00000020141	FREM1	5.615	5.34573	2.21604	protein_coding	Up
ENSBTAG00000020143	RDH10	6.64988	6.46452	1.52312	protein_coding	Up
ENSBTAG00000020193	DCLRE1A	7.60929	7.84568	-1.95947	protein_coding	Down
ENSBTAG00000020205		8.15912	8.41337	-2.10694	protein_coding	Down
ENSBTAG00000020219	MSS51	8.54521	8.73733	-1.59386	protein_coding	Down
ENSBTAG00000020266	SLC19A2	7.12368	6.93976	1.51118	protein_coding	Up
ENSBTAG00000020277	PPP2R1B	7.55269	7.27706	2.26854	protein_coding	Up
ENSBTAG00000020330	BTG1	8.76814	9.1035	-2.77674	protein_coding	Down
ENSBTAG00000020342	MYOC	7.88844	7.61152	2.27923	protein_coding	Up
ENSBTAG00000020344	SLC44A3	6.03163	6.265	-1.93448	protein_coding	Down
ENSBTAG00000020394	TNFAIP8L2	5.31685	5.11538	1.6562	protein_coding	Up
ENSBTAG00000020445	ZNF398	6.06481	6.38918	-2.68597	protein_coding	Down
ENSBTAG00000020454	LZTS3	8.12074	8.30925	-1.56408	protein_coding	Down
ENSBTAG00000020458	STX6	6.48501	6.2573	1.87285	protein_coding	Up
ENSBTAG00000020495	SH3YL1	7.97523	7.75227	1.83368	protein_coding	Up
ENSBTAG00000020517	MED9	6.97927	6.75625	1.83407	protein_coding	Up
ENSBTAG00000020566	BCR	6.78494	6.59647	1.54887	protein_coding	Up
ENSBTAG00000020596	TMEM126B	8.03264	8.2253	-1.59833	protein_coding	Down
ENSBTAG00000020602	IDO1	5.64837	6.27974	-5.22098	protein_coding	Down
ENSBTAG00000020647	RASL11B	6.70729	6.42446	2.32799	protein_coding	Up
ENSBTAG00000020649	CIITA	6.50529	6.77224	-2.21184	protein_coding	Down
ENSBTAG00000020658	LNX1	5.80644	5.62319	1.50565	protein_coding	Up
ENSBTAG00000020696	HECW2	5.65967	5.47256	1.53761	protein_coding	Up
ENSBTAG00000020714	DDX19B	7.59995	7.8268	-1.8807	protein_coding	Down
ENSBTAG00000020737	SOX8	6.16381	5.92269	1.9836	protein_coding	Up
ENSBTAG00000020766	ABCA7	6.11379	5.79252	2.64541	pseudogene	Up
ENSBTAG00000020797	CABLES2	7.3193	7.08941	1.89088	protein_coding	Up
ENSBTAG00000020798	C3H1orf94	7.32281	7.11162	1.73642	protein_coding	Up
ENSBTAG00000020814	C2CD4B	5.56195	5.21322	2.87219	protein_coding	Up
ENSBTAG00000020850	MUL1	9.57157	9.37353	1.62784	protein_coding	Up
ENSBTAG00000020852	SLC16A11	5.92029	5.72227	1.62762	protein_coding	Up
ENSBTAG00000020873	MAT2A	10.756	10.5212	1.93166	protein_coding	Up
ENSBTAG00000020898	CHST12	6.48285	6.69465	-1.75644	protein_coding	Down
ENSBTAG00000020979	NGFR	5.78319	5.34916	3.57655	protein_coding	Up
ENSBTAG00000020985	TYRP1	5.16774	4.86873	2.46162	protein_coding	Up
ENSBTAG00000020999	DDB2	6.52124	6.30429	1.78398	protein_coding	Up
ENSBTAG00000021000	USF3	7.82736	7.47445	2.90665	protein_coding	Up
ENSBTAG00000021019	SLC30A4	5.02425	4.82865	1.6077	protein_coding	Up
ENSBTAG00000021091	ANKFY1	7.20929	7.00119	1.71089	protein_coding	Up
ENSBTAG00000021211	DPT	7.33575	7.65683	-2.65885	protein_coding	Down
ENSBTAG00000021240	DCSTAMP	6.1889	5.48041	5.84283	protein_coding	Up
ENSBTAG00000021273	SEMA4B	6.49602	6.20763	2.37397	protein_coding	Up
ENSBTAG00000021287	SLC16A7	7.1678	6.76946	3.28183	protein_coding	Up
ENSBTAG00000021298	METTL11B	8.03774	8.23386	-1.62693	protein_coding	Down
ENSBTAG00000021310	COL4A4	5.9236	6.15623	-1.92842	protein_coding	Down
ENSBTAG00000021313	RUNDC3B	4.77005	4.46017	2.55137	protein_coding	Up
ENSBTAG00000021396	HEG1	7.08005	6.89617	1.51095	protein_coding	Up
ENSBTAG00000021407		7.96012	7.65426	2.51818	protein_coding	Up
ENSBTAG00000021413	ZIC3	5.99455	5.80771	1.53537	protein_coding	Up
ENSBTAG00000021433		5.95265	6.14194	-1.57051	protein_coding	Down
ENSBTAG00000021487	CIART	5.62828	5.8546	-1.8763	protein_coding	Down
ENSBTAG00000021516	GSTA1	6.52873	7.23902	-5.87274	protein_coding	Down
ENSBTAG00000021587	SMPDL3A	6.56516	6.2009	3.00036	protein_coding	Up
ENSBTAG00000021658	TAMALIN	6.71059	6.42766	2.32884	protein_coding	Up
ENSBTAG00000021691	PSMD14	9.85508	10.0638	-1.73112	protein_coding	Down
ENSBTAG00000021695	GLYCTK	7.71428	7.49969	1.76455	protein_coding	Up
ENSBTAG00000021706	TBX3	6.49364	6.25239	1.98465	protein_coding	Up
ENSBTAG00000021730	GJD2	4.98773	4.7008	2.36181	protein_coding	Up
ENSBTAG00000021741	RPS6KA2	8.39065	8.19535	1.60519	protein_coding	Up
ENSBTAG00000021809	DEPDC7	5.51692	5.78224	-2.19835	protein_coding	Down
ENSBTAG00000021811	ANGPT4	6.20996	6.02511	1.5189	protein_coding	Up
ENSBTAG00000021853	IP6K2	7.27377	7.47622	-1.67919	protein_coding	Down
ENSBTAG00000021912	DUSP7	8.73094	8.54476	1.52995	protein_coding	Up
ENSBTAG00000021942	HPS6	6.5022	6.29758	1.68215	protein_coding	Up
ENSBTAG00000021957	LTBP2	5.71503	5.45235	2.16159	protein_coding	Up
ENSBTAG00000021960	GPX8	8.33513	8.54059	-1.7041	protein_coding	Down
ENSBTAG00000021961	SPR	6.9755	7.2489	-2.26507	protein_coding	Down
ENSBTAG00000021968	MID2	5.12302	5.31846	-1.62132	protein_coding	Down
ENSBTAG00000021999	CPT1A	7.91207	7.65494	2.11583	protein_coding	Up
ENSBTAG00000022032	CHCHD10	11.7945	12.0478	-2.09862	protein_coding	Down
ENSBTAG00000022058	ACACB	11.822	11.4923	2.71446	protein_coding	Up
ENSBTAG00000022067	FAM216A	5.32515	5.07136	2.08822	protein_coding	Up
ENSBTAG00000022084		6.76063	6.55674	1.67611	pseudogene	Up
ENSBTAG00000022114	TMEM65	8.64585	8.37511	2.22812	protein_coding	Up
ENSBTAG00000022147	EPS8L2	6.15531	5.96582	1.55731	protein_coding	Up
ENSBTAG00000022185	IGHMBP2	8.22005	8.00743	1.74822	protein_coding	Up
ENSBTAG00000022227	PLSCR2	6.54445	6.34676	1.62501	protein_coding	Up
ENSBTAG00000022489		6.78485	7.23362	-3.71315	protein_coding	Down
ENSBTAG00000022570		7.96045	7.62605	2.75378	protein_coding	Up
ENSBTAG00000022580	INKA2	5.73014	5.53438	1.60903	protein_coding	Up
ENSBTAG00000022799	NOTCH1	8.38681	8.17369	1.75241	protein_coding	Up
ENSBTAG00000022825	BRI3	9.62382	9.81592	-1.59375	protein_coding	Down
ENSBTAG00000022887		6.0879	6.2988	-1.74898	protein_coding	Down
ENSBTAG00000022890	MBP	8.97094	8.57975	3.22278	protein_coding	Up
ENSBTAG00000022917	FANK1	5.59499	5.33327	2.15373	protein_coding	Up
ENSBTAG00000022986	TAFA5	5.04607	4.73726	2.54253	protein_coding	Up
ENSBTAG00000023144	PTPRC	5.2113	5.4173	-1.70847	protein_coding	Down
ENSBTAG00000023169		5.3504	5.55618	-1.70669	protein_coding	Down
ENSBTAG00000023177	CFH	7.50767	7.28178	1.85787	protein_coding	Up
ENSBTAG00000023429	PLS1	5.32923	5.56578	-1.96073	protein_coding	Down
ENSBTAG00000023464	ZFP82	4.83498	5.04213	-1.71798	protein_coding	Down
ENSBTAG00000023600	APOD	7.18572	7.5474	-2.99405	protein_coding	Down
ENSBTAG00000023659	MT2A	6.85141	7.25733	-3.35935	protein_coding	Down
ENSBTAG00000023788	EXD3	5.71308	5.46219	2.06426	protein_coding	Up
ENSBTAG00000023792		5.37673	5.56371	-1.55142	protein_coding	Down
ENSBTAG00000023823		5.29001	5.47463	-1.53198	protein_coding	Down
ENSBTAG00000023891	RBM20	8.00884	8.25515	-2.04143	protein_coding	Down
ENSBTAG00000023929	FOSL2	8.40081	8.20017	1.64928	protein_coding	Up
ENSBTAG00000023947	AVPI1	7.98527	7.7999	1.52317	protein_coding	Up
ENSBTAG00000023963	RHBDD1	6.40707	6.18553	1.82195	protein_coding	Up
ENSBTAG00000023970		5.84564	5.66283	1.50205	protein_coding	Up
ENSBTAG00000023978		6.07396	6.3389	-2.19519	protein_coding	Down
ENSBTAG00000023997	VAMP8	8.00733	8.23134	-1.85718	protein_coding	Down
ENSBTAG00000024086	TMEM35B	5.15166	5.37216	-1.82828	protein_coding	Down
ENSBTAG00000024115	FOXO6	9.99788	9.62838	3.04366	protein_coding	Up
ENSBTAG00000024162	SLC19A1	5.4525	5.71824	-2.20182	protein_coding	Down
ENSBTAG00000024379	LRRC17	5.67489	5.8607	-1.54179	protein_coding	Down
ENSBTAG00000024420	COL28A1	4.96264	4.74962	1.75153	protein_coding	Up
ENSBTAG00000024449	CENPF	4.87468	4.6358	1.96509	protein_coding	Up
ENSBTAG00000024490		5.08717	4.86496	1.82747	protein_coding	Up
ENSBTAG00000024492		7.13751	6.54454	4.88896	protein_coding	Up
ENSBTAG00000024509	TMEM52	9.59037	9.95468	-3.01573	protein_coding	Down
ENSBTAG00000024605	DYNLL1	9.04909	8.8659	1.50528	protein_coding	Up
ENSBTAG00000024826	TECRL	8.39521	8.15139	2.00588	protein_coding	Up
ENSBTAG00000024928	TNFRSF1B	6.20408	6.43783	-1.93767	protein_coding	Down
ENSBTAG00000024929	PPP1R27	11.5783	11.3766	1.65837	protein_coding	Up
ENSBTAG00000024960		7.71203	7.47877	1.91868	protein_coding	Up
ENSBTAG00000024984	FSBP	5.02173	4.82069	1.65255	protein_coding	Up
ENSBTAG00000025023		4.96033	5.15498	-1.61476	protein_coding	Down
ENSBTAG00000025210	COL4A2	11.3948	11.1614	1.91964	protein_coding	Up
ENSBTAG00000025221	TEX30	5.63754	5.8354	-1.64133	protein_coding	Down
ENSBTAG00000025313	DYNLL2	11.4709	11.7384	-2.21613	protein_coding	Down
ENSBTAG00000025329	IRF2BPL	9.61462	9.31643	2.45485	protein_coding	Up
ENSBTAG00000025385		8.01799	8.72954	-5.88309	protein_coding	Down
ENSBTAG00000025443	FNIP1	7.76905	7.96056	-1.58887	protein_coding	Down
ENSBTAG00000025642	RYR3	6.84026	6.653	1.53885	pseudogene	Up
ENSBTAG00000025669	B3GALT4	7.61197	7.80523	-1.60333	protein_coding	Down
ENSBTAG00000025718	HMGCLL1	4.83874	5.03012	-1.58777	protein_coding	Down
ENSBTAG00000025898	TBC1D8	7.3519	7.53903	-1.55275	protein_coding	Down
ENSBTAG00000026248	POP7	7.41533	7.63478	-1.81962	protein_coding	Down
ENSBTAG00000026344	MAFA	10.3381	9.97545	2.98745	protein_coding	Up
ENSBTAG00000026637		6.81625	6.39702	3.45435	protein_coding	Up
ENSBTAG00000026779	LYZ	5.11523	5.32074	-1.7045	protein_coding	Down
ENSBTAG00000026796		6.14413	5.85315	2.3953	protein_coding	Up
ENSBTAG00000026819	HDAC7	9.3067	9.09994	1.69989	protein_coding	Up
ENSBTAG00000026848		4.82012	5.05145	-1.91771	protein_coding	Down
ENSBTAG00000027075		5.17205	5.40715	-1.94884	protein_coding	Down
ENSBTAG00000027320	KCNB1	6.12162	6.39329	-2.2508	protein_coding	Down
ENSBTAG00000027425	CCDC190	6.9405	7.12674	-1.5453	protein_coding	Down
ENSBTAG00000027431	ZNF227	5.93756	5.71574	1.82421	protein_coding	Up
ENSBTAG00000027477	B3GAT1	9.78336	9.55159	1.90645	protein_coding	Up
ENSBTAG00000027557	ZNF408	7.61851	7.39292	1.8553	protein_coding	Up
ENSBTAG00000027629		13.4225	13.6623	-1.98794	protein_coding	Down
ENSBTAG00000027694	TTC30A	5.91997	6.10225	-1.51268	protein_coding	Down
ENSBTAG00000027764	EID1	10.1945	10.5387	-2.84994	protein_coding	Down
ENSBTAG00000027770		5.03119	4.84813	1.5041	protein_coding	Up
ENSBTAG00000027867		5.35674	5.63031	-2.26653	protein_coding	Down
ENSBTAG00000027991	ANAPC1	6.94497	7.13264	-1.55722	protein_coding	Down
ENSBTAG00000029237	5S_rRNA	5.57353	5.36515	1.71317	rRNA	Up
ENSBTAG00000029790	MIR1-1	5.34154	5.15228	1.55534	miRNA	Up
ENSBTAG00000029906	bta-mir-133a-2	9.72929	9.97479	-2.03475	miRNA	Down
ENSBTAG00000029926	MIR1-2	8.08551	8.29871	-1.76795	miRNA	Down
ENSBTAG00000030162	AXIN2	5.97891	5.74254	1.94437	protein_coding	Up
ENSBTAG00000030168	MIF4GD	10.849	11.0336	-1.53163	protein_coding	Down
ENSBTAG00000030208	ERFE	5.6457	5.18078	3.83158	protein_coding	Up
ENSBTAG00000030255	PDXP	7.99448	7.73203	2.1597	protein_coding	Up
ENSBTAG00000030334	AOC2	6.21934	5.96136	2.12278	protein_coding	Up
ENSBTAG00000030340	IFFO2	6.30354	5.89383	3.3757	protein_coding	Up
ENSBTAG00000030425	ID3	8.73125	8.38917	2.8172	protein_coding	Up
ENSBTAG00000030434	FUCA1	7.65234	7.43736	1.76767	protein_coding	Up
ENSBTAG00000030470		5.8031	6.04099	-1.97187	protein_coding	Down
ENSBTAG00000030499		9.14044	8.8064	2.75086	protein_coding	Up
ENSBTAG00000030520	PROB1	10.4347	10.2116	1.83463	protein_coding	Up
ENSBTAG00000030599	SMOC1	6.50327	6.24433	2.1307	protein_coding	Up
ENSBTAG00000030824	L3HYPDH	5.3337	5.56114	-1.8856	protein_coding	Down
ENSBTAG00000030897	XRCC2	4.88908	4.70585	1.50555	protein_coding	Up
ENSBTAG00000030913	MX1	6.73429	7.09739	-3.00579	protein_coding	Down
ENSBTAG00000030974	TUBA4A	13.8113	13.5993	1.74321	protein_coding	Up
ENSBTAG00000031061	POLR2L	9.12037	9.30974	-1.57123	protein_coding	Down
ENSBTAG00000031184	CDKN1C	8.27877	8.0637	1.76846	protein_coding	Up
ENSBTAG00000031209	SLC22A4	5.48513	5.28882	1.61358	protein_coding	Up
ENSBTAG00000031335	BABAM2	8.87776	8.67022	1.70627	protein_coding	Up
ENSBTAG00000031388	DNAAF4	5.06544	4.74203	2.66308	protein_coding	Up
ENSBTAG00000031439	CDC14A	7.7563	8.01031	-2.10499	protein_coding	Down
ENSBTAG00000031476	DLL1	7.62709	7.43499	1.57879	protein_coding	Up
ENSBTAG00000031500	SHMT2	9.21133	9.02372	1.5417	protein_coding	Up
ENSBTAG00000031503	NDUFA4L2	6.23965	6.03726	1.66379	protein_coding	Up
ENSBTAG00000031551	PRSS53	5.45269	5.64602	-1.60396	protein_coding	Down
ENSBTAG00000031682	ZNF484	6.95566	6.68834	2.1999	protein_coding	Up
ENSBTAG00000031750	PLAC8B	5.09044	5.35358	-2.18039	protein_coding	Down
ENSBTAG00000031774	H1-12	5.93452	6.24348	-2.55871	protein_coding	Down
ENSBTAG00000031797	MANF	8.66604	8.85558	-1.57268	protein_coding	Down
ENSBTAG00000032057		5.21356	5.88206	-5.52768	protein_coding	Down
ENSBTAG00000032089	CDC42EP2	7.08716	6.84426	1.99828	protein_coding	Up
ENSBTAG00000032140	SBK1	6.09639	5.8895	1.70087	protein_coding	Up
ENSBTAG00000032301	SLC26A7	4.97892	5.19061	-1.75549	protein_coding	Down
ENSBTAG00000032503	ITPRIPL2	5.7971	5.47914	2.61813	protein_coding	Up
ENSBTAG00000032515	PLA2R1	6.38889	6.03356	2.92664	protein_coding	Up
ENSBTAG00000032517	BCL7A	6.61304	6.39271	1.81189	protein_coding	Up
ENSBTAG00000032591	CTHRC1	5.15914	5.38407	-1.86483	protein_coding	Down
ENSBTAG00000032640	CEP20	8.14504	8.34856	-1.68811	protein_coding	Down
ENSBTAG00000032812		4.9821	5.19756	-1.78667	protein_coding	Down
ENSBTAG00000032852	GPRASP2	6.37265	6.1833	1.5561	protein_coding	Up
ENSBTAG00000032996	P4HA1	8.61841	8.80309	-1.53249	protein_coding	Down
ENSBTAG00000033089	HACD1	11.6007	11.795	-1.61228	protein_coding	Down
ENSBTAG00000033096	PAG2	4.72141	4.90269	-1.50441	protein_coding	Down
ENSBTAG00000033268	ZFHX4	6.34938	6.53312	-1.52474	protein_coding	Down
ENSBTAG00000033290	TMEM60	6.59639	6.81034	-1.7742	protein_coding	Down
ENSBTAG00000033504	MAK16	8.119	8.46941	-2.90103	protein_coding	Down
ENSBTAG00000033642		5.07112	5.35995	-2.39253	protein_coding	Down
ENSBTAG00000033669	IL17RC	6.43782	6.65199	-1.77604	protein_coding	Down
ENSBTAG00000033835	MPZ	9.406	9.07155	2.75425	protein_coding	Up
ENSBTAG00000033983	MAP2K1	9.9924	9.79626	1.61209	protein_coding	Up
ENSBTAG00000034193	BCO2	6.33314	6.54021	-1.71729	protein_coding	Down
ENSBTAG00000034222	CAB39L	5.80646	5.59849	1.70985	protein_coding	Up
ENSBTAG00000034349	IFI44	4.91391	5.1937	-2.31782	protein_coding	Down
ENSBTAG00000034436	PDPK1	7.59571	7.40956	1.52966	protein_coding	Up
ENSBTAG00000034529	HMGA1	9.10971	9.30933	-1.65585	protein_coding	Down
ENSBTAG00000034963	MKS1	5.61675	5.8056	-1.5669	protein_coding	Down
ENSBTAG00000034987	MKKS	9.30336	9.58945	-2.36987	protein_coding	Down
ENSBTAG00000035018	ZCCHC12	6.57902	6.21426	3.00448	protein_coding	Up
ENSBTAG00000035084	FZD3	5.01553	5.22688	-1.75269	protein_coding	Down
ENSBTAG00000035370	TBPL1	6.11175	6.31169	-1.65848	protein_coding	Down
ENSBTAG00000036099		5.26275	5.55009	-2.38013	protein_coding	Down
ENSBTAG00000037339	MIR208B	6.01835	5.71428	2.50344	miRNA	Up
ENSBTAG00000037383	AKAP13	9.09016	8.90296	1.53829	protein_coding	Up
ENSBTAG00000037456	AHDC1	9.84926	9.63935	1.7258	protein_coding	Up
ENSBTAG00000037566	ZNF500	4.972	4.76347	1.71444	protein_coding	Up
ENSBTAG00000037605		7.6705	6.88907	6.44521	protein_coding	Up
ENSBTAG00000037644	HBB	8.96537	9.78694	-6.79164	protein_coding	Down
ENSBTAG00000037778	CXCL3	5.74964	5.48526	2.17564	protein_coding	Up
ENSBTAG00000037794	MYH4	8.89823	8.19117	5.83114	protein_coding	Up
ENSBTAG00000037811	CCL2	4.9442	4.70368	1.97859	protein_coding	Up
ENSBTAG00000037988	ZSCAN31	5.57344	6.03095	-3.78536	protein_coding	Down
ENSBTAG00000038048	MRC1	8.34448	8.72655	-3.16246	protein_coding	Down
ENSBTAG00000038074	GJC3	5.28619	5.06258	1.83898	protein_coding	Up
ENSBTAG00000038088		5.5748	5.82141	-2.04387	protein_coding	Down
ENSBTAG00000038128	BOLA-DQA5	5.15804	5.75192	-4.91141	protein_coding	Down
ENSBTAG00000038235	NOD1	5.34736	5.10619	1.98399	protein_coding	Up
ENSBTAG00000038241	REPIN1	10.2338	10.0491	1.51764	protein_coding	Up
ENSBTAG00000038286	PPDPFL	8.35967	8.03108	2.70585	protein_coding	Up
ENSBTAG00000038306	CBX2	5.88116	5.67238	1.71654	protein_coding	Up
ENSBTAG00000038321	LIPE	7.58555	7.21339	3.06566	protein_coding	Up
ENSBTAG00000038477	GGCX	7.5244	7.70747	-1.51916	protein_coding	Down
ENSBTAG00000038700	FAM124B	5.59	5.37607	1.75899	protein_coding	Up
ENSBTAG00000038735	LHB	6.52346	6.3365	1.53635	protein_coding	Up
ENSBTAG00000038738	PXMP4	5.33133	5.10142	1.89102	protein_coding	Up
ENSBTAG00000038748	HBG	6.01925	6.66684	-5.35494	protein_coding	Down
ENSBTAG00000038865	TCEA3	10.9652	11.1924	-1.88387	protein_coding	Down
ENSBTAG00000038869	ZNF383	6.25414	6.03172	1.82914	protein_coding	Up
ENSBTAG00000038889	RILP	11.0922	10.7912	2.47769	protein_coding	Up
ENSBTAG00000038929	BCAS4	5.50701	5.29367	1.75424	protein_coding	Up
ENSBTAG00000038938	GBP2	4.6859	4.93454	-2.06064	protein_coding	Down
ENSBTAG00000038978		5.50483	5.81144	-2.53935	protein_coding	Down
ENSBTAG00000039050	P2RY2	9.55075	9.22783	2.65911	protein_coding	Up
ENSBTAG00000039196		4.59101	4.94695	-2.94665	protein_coding	Down
ENSBTAG00000039319	CYP4F2	4.73117	4.99664	-2.19961	protein_coding	Down
ENSBTAG00000039335	ARRDC2	6.79481	7.24652	-3.73746	protein_coding	Down
ENSBTAG00000039340	SCN4B	10.2841	9.80187	3.97413	protein_coding	Up
ENSBTAG00000039440		4.34648	4.82321	-3.94409	protein_coding	Down
ENSBTAG00000039453		6.41543	6.23026	1.52159	protein_coding	Up
ENSBTAG00000039657	H2AC6	5.1179	5.46244	-2.85249	protein_coding	Down
ENSBTAG00000039682	MTUS1	10.7748	10.9685	-1.60708	protein_coding	Down
ENSBTAG00000039686	ACOT11	6.4646	6.20998	2.09506	protein_coding	Up
ENSBTAG00000039688	RFLNA	6.80103	6.55729	2.00524	protein_coding	Up
ENSBTAG00000039711	ZFP62	6.84238	7.14205	-2.48204	protein_coding	Down
ENSBTAG00000039719	PHGDH	8.34439	8.02084	2.66423	protein_coding	Up
ENSBTAG00000039728		6.74024	7.17244	-3.5764	protein_coding	Down
ENSBTAG00000039823	KBTBD7	6.07989	5.85025	1.88874	protein_coding	Up
ENSBTAG00000039849		5.3302	5.11184	1.79561	protein_coding	Up
ENSBTAG00000039886		4.85609	5.11851	-2.17439	protein_coding	Down
ENSBTAG00000039935	KCNC3	5.19582	5.37936	-1.52308	protein_coding	Down
ENSBTAG00000040053	MYH6	11.7783	11.4939	2.34082	protein_coding	Up
ENSBTAG00000040169		5.96934	6.19555	-1.87542	protein_coding	Down
ENSBTAG00000040298	GSTT1	6.39877	6.6072	-1.72857	protein_coding	Down
ENSBTAG00000040390	EBF2	5.47029	5.70279	-1.92731	protein_coding	Down
ENSBTAG00000040398	CRACD	9.34855	9.0699	2.2935	protein_coding	Up
ENSBTAG00000040518		5.02481	4.80811	1.78194	protein_coding	Up
ENSBTAG00000040569	NLRX1	7.70396	7.51639	1.54138	protein_coding	Up
ENSBTAG00000042631	SNORD86	4.8786	4.58203	2.44146	snoRNA	Up
ENSBTAG00000043548		5.17051	4.69106	3.95153	Mt_tRNA	Up
ENSBTAG00000043564	ATP8	5.96755	6.16115	-1.60608	protein_coding	Down
ENSBTAG00000043567		13.0369	13.2214	-1.53068	Mt_rRNA	Down
ENSBTAG00000043571	ND2	15.8434	16.0265	-1.5198	protein_coding	Down
ENSBTAG00000043583		6.03244	6.23287	-1.6625	Mt_tRNA	Down
ENSBTAG00000044022	KIAA1671	6.84161	6.56083	2.31113	protein_coding	Up
ENSBTAG00000044056	C19H17orf98	4.08223	4.38149	-2.47863	protein_coding	Down
ENSBTAG00000044062	RBMS3	4.66848	4.87105	-1.68023	protein_coding	Down
ENSBTAG00000044105	FOXO1	7.14769	7.43679	-2.39467	protein_coding	Down
ENSBTAG00000044132	NTN5	5.24918	5.45734	-1.72643	protein_coding	Down
ENSBTAG00000044192	MAF	10.1257	9.82131	2.50608	protein_coding	Up
ENSBTAG00000044624	U7	6.65591	6.45949	1.61447	snRNA	Up
ENSBTAG00000045504		5.50627	5.70705	-1.66545	protein_coding	Down
ENSBTAG00000045509	FAM217B	5.25448	5.48499	-1.91097	protein_coding	Down
ENSBTAG00000045699	CTNNA3	6.47253	6.93242	-3.80504	protein_coding	Down
ENSBTAG00000045791	ZNF623	6.50926	6.29363	1.77309	protein_coding	Up
ENSBTAG00000045880		4.78917	5.0257	-1.96063	protein_coding	Down
ENSBTAG00000045904	PIM3	9.74927	9.48518	2.17325	protein_coding	Up
ENSBTAG00000045914		5.05686	5.25849	-1.67246	protein_coding	Down
ENSBTAG00000045989	CDC42EP5	4.74426	4.92744	-1.52007	protein_coding	Down
ENSBTAG00000046044		5.27642	4.958	2.62183	protein_coding	Up
ENSBTAG00000046104	B3GALNT1	5.87447	6.09427	-1.82249	pseudogene	Down
ENSBTAG00000046110	CLCF1	5.95698	6.26011	-2.51059	protein_coding	Down
ENSBTAG00000046121		8.25193	7.93332	2.62345	protein_coding	Up
ENSBTAG00000046122	NRARP	5.48002	5.25139	1.88048	protein_coding	Up
ENSBTAG00000046172		8.10721	8.30055	-1.604	protein_coding	Down
ENSBTAG00000046177	IGFN1	15.1077	14.7299	3.11215	protein_coding	Up
ENSBTAG00000046180		5.02593	4.71726	2.54142	protein_coding	Up
ENSBTAG00000046189	RNASE13	5.31081	5.06417	2.02913	protein_coding	Up
ENSBTAG00000046231		5.08223	5.26603	-1.52515	protein_coding	Down
ENSBTAG00000046286	CCNB3	5.62386	5.97453	-2.90312	protein_coding	Down
ENSBTAG00000046307	CEBPD	8.12481	8.38125	-2.12506	protein_coding	Down
ENSBTAG00000046324		5.07926	5.38306	-2.51616	protein_coding	Down
ENSBTAG00000046391	GRAMD2A	7.01854	6.80713	1.7382	protein_coding	Up
ENSBTAG00000046486		6.03	5.79225	1.95577	protein_coding	Up
ENSBTAG00000046552	GGACT	6.28875	6.47573	-1.55146	protein_coding	Down
ENSBTAG00000046585	RTL1	4.60085	4.82573	-1.86447	protein_coding	Down
ENSBTAG00000046626	CCNP	5.09843	4.86043	1.95781	protein_coding	Up
ENSBTAG00000046671	WFS1	9.53683	9.28704	2.05515	protein_coding	Up
ENSBTAG00000046677	RTN4R	4.81001	4.5606	2.05207	protein_coding	Up
ENSBTAG00000046760	BRD1	7.98426	7.78704	1.62103	protein_coding	Up
ENSBTAG00000046922	TWIST1	5.00979	5.19605	-1.54553	protein_coding	Down
ENSBTAG00000046980	KLRF2	4.52425	4.05977	3.82799	protein_coding	Up
ENSBTAG00000046988	FAM43B	6.78249	6.45005	2.73767	protein_coding	Up
ENSBTAG00000046989	MANEAL	5.98659	6.21068	-1.85792	protein_coding	Down
ENSBTAG00000047161	ARSH	4.76913	5.02248	-2.09951	protein_coding	Down
ENSBTAG00000047223	GNAS	9.09304	9.31881	-1.87184	protein_coding	Down
ENSBTAG00000047441		7.21513	7.90184	-5.67793	protein_coding	Down
ENSBTAG00000047468	FAM78B	6.00521	5.79149	1.75729	protein_coding	Up
ENSBTAG00000047502	FKBP5	10.8369	10.4321	3.33548	protein_coding	Up
ENSBTAG00000047604	HSD17B1	5.39078	5.19423	1.61557	protein_coding	Up
ENSBTAG00000047648	SYT2	5.4329	5.24763	1.52237	protein_coding	Up
ENSBTAG00000047734	RUSF1	6.26357	6.49222	-1.89551	protein_coding	Down
ENSBTAG00000047793	TSSC4	8.93639	9.1432	-1.71521	protein_coding	Down
ENSBTAG00000047807	SAPCD2	5.79776	5.5418	2.10605	protein_coding	Up
ENSBTAG00000047955	ZNF774	6.9344	6.52858	3.3436	protein_coding	Up
ENSBTAG00000047975	DOK5	9.02713	9.22781	-1.66461	protein_coding	Down
ENSBTAG00000047997	PRPS2	5.60474	5.32987	2.26234	protein_coding	Up
ENSBTAG00000048011	GPR160	5.03169	4.70946	2.65332	protein_coding	Up
ENSBTAG00000048062	KDM6B	9.3495	9.11565	1.92356	protein_coding	Up
ENSBTAG00000048140	DNAAF5	8.05812	8.30263	-2.02658	protein_coding	Down
ENSBTAG00000048257		4.88269	4.58372	2.4613	protein_coding	Up
ENSBTAG00000048308	ICMT	7.54688	7.27566	2.23214	protein_coding	Up
ENSBTAG00000048331		6.4824	6.29354	1.55202	protein_coding	Up
ENSBTAG00000048353		5.47976	5.26064	1.80193	protein_coding	Up
ENSBTAG00000048470	IFITM1	7.92819	8.22122	-2.42715	protein_coding	Down
ENSBTAG00000048486	IQANK1	6.27745	6.05473	1.8316	protein_coding	Up
ENSBTAG00000048501	ST8SIA2	8.78666	8.57355	1.75228	protein_coding	Up
ENSBTAG00000048508	INHBA	4.75976	4.96081	-1.66762	protein_coding	Down
ENSBTAG00000048515		9.7549	10.1488	-3.26015	lncRNA	Down
ENSBTAG00000048538		5.00876	4.8188	1.56107	processed_pseudogene	Up
ENSBTAG00000048565	BASP1	5.46365	5.64969	-1.5437	protein_coding	Down
ENSBTAG00000048585	SLN	13.6928	13.5078	1.51984	protein_coding	Up
ENSBTAG00000048608	5_8S_rRNA	6.53235	6.10218	3.54466	rRNA	Up
ENSBTAG00000048655	NT5E	5.13395	4.92686	1.70257	protein_coding	Up
ENSBTAG00000048692		5.76667	6.00369	-1.96469	protein_coding	Down
ENSBTAG00000048707		5.09714	5.30823	-1.75053	protein_coding	Down
ENSBTAG00000048781		10.9569	11.2462	-2.3967	lncRNA	Down
ENSBTAG00000048790		6.6163	6.42689	1.55663	protein_coding	Up
ENSBTAG00000048856	C16H1orf115	7.53758	7.72185	-1.52906	protein_coding	Down
ENSBTAG00000048871		5.85995	5.65952	1.64755	lncRNA	Up
ENSBTAG00000048908		6.008	5.8191	1.55234	lncRNA	Up
ENSBTAG00000048950	ULBP13	7.35406	6.94739	3.35062	protein_coding	Up
ENSBTAG00000048980		5.98421	6.27031	-2.36995	protein_coding	Down
ENSBTAG00000049010	RNF150	7.35423	7.53876	-1.53124	protein_coding	Down
ENSBTAG00000049030		6.08603	5.74709	2.79131	lncRNA	Up
ENSBTAG00000049035	C8orf89	5.50332	5.69111	-1.55816	protein_coding	Down
ENSBTAG00000049215	SHISA3	7.06807	6.80784	2.14137	protein_coding	Up
ENSBTAG00000049281		5.87957	5.68099	1.63235	lncRNA	Up
ENSBTAG00000049308	GAS2L3	5.48213	5.2307	2.06875	protein_coding	Up
ENSBTAG00000049331		5.91499	6.12549	-1.74566	lncRNA	Down
ENSBTAG00000049393		4.83124	5.03806	-1.7153	pseudogene	Down
ENSBTAG00000049487		5.79482	5.59759	1.62111	protein_coding	Up
ENSBTAG00000049547		5.45548	5.26259	1.58536	protein_coding	Up
ENSBTAG00000049594		5.15349	5.53352	-3.14557	lncRNA	Down
ENSBTAG00000049613		5.6654	5.45612	1.72073	protein_coding	Up
ENSBTAG00000049726	SRRM5	5.29174	5.49515	-1.68712	protein_coding	Down
ENSBTAG00000049782		5.06162	5.37304	-2.57896	protein_coding	Down
ENSBTAG00000049807	HS6ST2	4.77549	5.07596	-2.48858	protein_coding	Down
ENSBTAG00000049864	PPP1R9B	8.99503	8.72614	2.21291	protein_coding	Up
ENSBTAG00000049881	ZNF266	6.31307	6.07196	1.98357	protein_coding	Up
ENSBTAG00000049889	ZBED4	7.58551	7.40207	1.50725	protein_coding	Up
ENSBTAG00000050008		9.61956	9.90809	-2.39006	protein_coding	Down
ENSBTAG00000050091	GCNT4	5.23917	5.55903	-2.64872	protein_coding	Down
ENSBTAG00000050158		9.82696	9.60476	1.82737	pseudogene	Up
ENSBTAG00000050189		7.14429	6.89533	2.04831	protein_coding	Up
ENSBTAG00000050214		4.71349	5.0115	-2.46835	processed_pseudogene	Down
ENSBTAG00000050359		5.84747	6.04035	-1.60019	protein_coding	Down
ENSBTAG00000050385		6.06404	6.26829	-1.69404	protein_coding	Down
ENSBTAG00000050396		4.97878	4.47246	4.17344	lncRNA	Up
ENSBTAG00000050438		5.75579	6.01728	-2.16676	protein_coding	Down
ENSBTAG00000050504	ARX	7.22155	7.0114	1.72787	protein_coding	Up
ENSBTAG00000050550	FAM110B	6.88662	7.10931	-1.84635	protein_coding	Down
ENSBTAG00000050647		5.89293	6.12056	-1.88719	processed_pseudogene	Down
ENSBTAG00000050654		5.78788	5.58362	1.67919	lncRNA	Up
ENSBTAG00000050675	BOLA3	9.69697	9.9379	-1.99703	protein_coding	Down
ENSBTAG00000050678		6.37612	6.09963	2.27566	lncRNA	Up
ENSBTAG00000050733	ATP6AP1L	5.70573	5.45652	2.05037	protein_coding	Up
ENSBTAG00000050776		4.91949	5.10636	-1.55058	lncRNA	Down
ENSBTAG00000050785		5.38396	5.63286	-2.06281	protein_coding	Down
ENSBTAG00000050906		5.58141	5.77583	-1.61291	protein_coding	Down
ENSBTAG00000050924		5.57974	5.36565	1.76034	lncRNA	Up
ENSBTAG00000050933	SHISA4	11.2208	11.4418	-1.83205	protein_coding	Down
ENSBTAG00000051000		5.46416	5.66407	-1.65828	pseudogene	Down
ENSBTAG00000051013	RASSF3	9.26774	9.48241	-1.78014	protein_coding	Down
ENSBTAG00000051047		4.69158	4.50541	1.52984	protein_coding	Up
ENSBTAG00000051087		4.81116	4.99413	-1.51833	protein_coding	Down
ENSBTAG00000051102	KCNK3	7.44883	7.24246	1.69663	protein_coding	Up
ENSBTAG00000051122		4.99535	4.53839	3.76581	lncRNA	Up
ENSBTAG00000051158		6.27892	5.99186	2.36293	lncRNA	Up
ENSBTAG00000051191		10.7827	11.0058	-1.85024	lncRNA	Down
ENSBTAG00000051211	DUSP8	9.5139	9.3147	1.63746	protein_coding	Up
ENSBTAG00000051258		5.19539	5.01255	1.50235	protein_coding	Up
ENSBTAG00000051276		5.10035	4.69472	3.34209	lncRNA	Up
ENSBTAG00000051305	INAFM2	6.51177	6.28702	1.84843	protein_coding	Up
ENSBTAG00000051316		9.08039	8.65845	3.47674	pseudogene	Up
ENSBTAG00000051328		5.18877	5.37139	-1.51547	protein_coding	Down
ENSBTAG00000051333	ARID5B	7.48418	7.98538	-4.14613	protein_coding	Down
ENSBTAG00000051340		4.9819	5.28689	-2.52589	protein_coding	Down
ENSBTAG00000051341	FZD9	8.00208	7.79135	1.73261	protein_coding	Up
ENSBTAG00000051348		5.56946	5.75669	-1.55348	protein_coding	Down
ENSBTAG00000051359		6.69624	6.14279	4.5627	lncRNA	Up
ENSBTAG00000051385		4.98309	4.71904	2.17294	lncRNA	Up
ENSBTAG00000051401		6.58885	6.33949	2.0516	lncRNA	Up
ENSBTAG00000051412	HBA	7.44447	8.05719	-5.06705	protein_coding	Down
ENSBTAG00000051419		5.9932	5.80309	1.56231	protein_coding	Up
ENSBTAG00000051443		5.63067	5.43617	1.59863	lncRNA	Up
ENSBTAG00000051519		6.85109	7.51403	-5.4817	protein_coding	Down
ENSBTAG00000051537		5.91777	5.65129	2.19303	protein_coding	Up
ENSBTAG00000051572	ZNF646	7.02007	7.2245	-1.69554	protein_coding	Down
ENSBTAG00000051600		6.01917	5.75743	2.1538	protein_coding	Up
ENSBTAG00000051767		9.72223	9.46732	2.09746	protein_coding	Up
ENSBTAG00000051785	bta-mir-29b-2	4.88894	4.6435	2.01929	miRNA	Up
ENSBTAG00000051828		8.42989	8.20042	1.88741	pseudogene	Up
ENSBTAG00000051880		5.33649	5.64504	-2.55531	protein_coding	Down
ENSBTAG00000051907	CYBA	6.74966	6.37596	3.07838	protein_coding	Up
ENSBTAG00000051933		6.58287	6.05788	4.3277	lncRNA	Up
ENSBTAG00000051967		4.91294	4.6363	2.27684	lncRNA	Up
ENSBTAG00000052038		6.80816	6.27084	4.42952	lncRNA	Up
ENSBTAG00000052230		5.98213	5.26908	5.88049	protein_coding	Up
ENSBTAG00000052369		6.92272	6.65347	2.21585	lncRNA	Up
ENSBTAG00000052374	FBXL14	6.06048	5.79799	2.16005	protein_coding	Up
ENSBTAG00000052397		4.11905	4.69154	-4.73487	protein_coding	Down
ENSBTAG00000052413	GNAS	9.72331	10.0254	-2.50191	protein_coding	Down
ENSBTAG00000052414	HAP1	5.53626	5.18171	2.92026	protein_coding	Up
ENSBTAG00000052504	KLF2	8.30665	7.96827	2.78672	protein_coding	Up
ENSBTAG00000052532		5.4093	5.13123	2.28874	protein_coding	Up
ENSBTAG00000052534	U6	5.37658	5.15355	1.83423	snRNA	Up
ENSBTAG00000052562	ID4	5.41913	5.68179	-2.17633	protein_coding	Down
ENSBTAG00000052600		9.05823	8.68187	3.1003	protein_coding	Up
ENSBTAG00000052720		7.68464	8.20448	-4.30009	protein_coding	Down
ENSBTAG00000052721		5.73469	5.93807	-1.68692	lncRNA	Down
ENSBTAG00000052725	bta-mir-11997	6.96915	6.74012	1.88376	miRNA	Up
ENSBTAG00000052791	JUND	10.5388	10.2539	2.34521	protein_coding	Up
ENSBTAG00000052878		5.8757	6.07306	-1.63722	protein_coding	Down
ENSBTAG00000052906	ZNF8	7.40977	7.22245	1.53933	protein_coding	Up
ENSBTAG00000052953		6.29036	6.07141	1.80057	pseudogene	Up
ENSBTAG00000053029	ZNF26	5.77018	5.99888	-1.89594	protein_coding	Down
ENSBTAG00000053050	SAMD9	5.18056	5.45814	-2.29961	pseudogene	Down
ENSBTAG00000053055		5.13508	4.8975	1.9544	lncRNA	Up
ENSBTAG00000053073		5.42232	5.19628	1.85903	protein_coding	Up
ENSBTAG00000053194		5.06705	5.25536	-1.56246	lncRNA	Down
ENSBTAG00000053210	SNRPG	7.0945	7.30611	-1.75485	protein_coding	Down
ENSBTAG00000053232		5.64569	5.45847	1.53847	lncRNA	Up
ENSBTAG00000053238		7.41474	7.5972	-1.51421	protein_coding	Down
ENSBTAG00000053276		5.00643	4.78656	1.8081	protein_coding	Up
ENSBTAG00000053347		5.37521	5.60261	-1.88519	protein_coding	Down
ENSBTAG00000053361	KLHL30	8.32644	8.13009	1.61388	protein_coding	Up
ENSBTAG00000053386	RAB43	6.58784	6.30982	2.28822	protein_coding	Up
ENSBTAG00000053400		5.05058	4.81987	1.89764	protein_coding	Up
ENSBTAG00000053537		4.93924	4.68245	2.11296	protein_coding	Up
ENSBTAG00000053595	HOXA9	8.11993	7.89619	1.84009	protein_coding	Up
ENSBTAG00000053632		5.6137	5.90088	-2.37888	protein_coding	Down
ENSBTAG00000053677	HERC1	5.56864	5.34288	1.85672	protein_coding	Up
ENSBTAG00000053678		9.58157	9.30316	2.29147	lncRNA	Up
ENSBTAG00000053699		5.17152	5.37329	-1.6736	protein_coding	Down
ENSBTAG00000053806		5.42605	5.64442	-1.81071	protein_coding	Down
ENSBTAG00000053807	OAS1X	6.26072	5.93154	2.71075	protein_coding	Up
ENSBTAG00000053836	CCDC71L	5.71193	6.0173	-2.52909	protein_coding	Down
ENSBTAG00000053854	ABHD14A	6.55189	6.35699	1.60191	protein_coding	Up
ENSBTAG00000053905		6.19134	6.39684	-1.70435	lncRNA	Down
ENSBTAG00000053970	SOST	5.95026	5.6372	2.57766	protein_coding	Up
ENSBTAG00000053996	ZNF853	8.67415	8.87232	-1.6439	protein_coding	Down
ENSBTAG00000054051		6.96835	7.16767	-1.65338	protein_coding	Down
ENSBTAG00000054072	ADM2	5.32418	4.80266	4.29899	protein_coding	Up
ENSBTAG00000054085	SELENOP	10.5031	10.1969	2.52139	protein_coding	Up
ENSBTAG00000054182		9.23388	9.42569	-1.59135	lncRNA	Down
ENSBTAG00000054195	GPX1	10.4262	10.0367	3.20965	protein_coding	Up
ENSBTAG00000054229	C2CD3	5.15754	4.95498	1.66516	protein_coding	Up
ENSBTAG00000054330	TUBB2B	6.02729	5.72001	2.52989	protein_coding	Up
ENSBTAG00000054349		6.08098	6.28666	-1.70593	lncRNA	Down
ENSBTAG00000054406	C18H19orf33	6.83194	6.59401	1.95723	protein_coding	Up
ENSBTAG00000054434		4.97082	5.24198	-2.24657	lncRNA	Down
ENSBTAG00000054469	SLC25A53	5.91316	5.67802	1.93423	protein_coding	Up
ENSBTAG00000054495		6.34206	6.13072	1.73763	lncRNA	Up
ENSBTAG00000054499		5.12971	5.53539	-3.35739	protein_coding	Down
ENSBTAG00000054543		4.48674	4.75748	-2.24315	processed_pseudogene	Down
ENSBTAG00000054579		4.67616	4.99547	-2.64416	protein_coding	Down
ENSBTAG00000054592	SCN2B	5.04561	5.24759	-1.67531	protein_coding	Down
ENSBTAG00000054677		4.91256	4.69623	1.77889	lncRNA	Up
ENSBTAG00000054700		5.154	4.96454	1.557	protein_coding	Up
ENSBTAG00000054716		5.82236	5.59614	1.86051	lncRNA	Up
ENSBTAG00000054758		5.77591	5.30942	3.84455	misc_RNA	Up
ENSBTAG00000054778		5.12269	4.88399	1.96358	protein_coding	Up
ENSBTAG00000054808	MT1A	5.38441	5.70514	-2.65591	protein_coding	Down
ENSBTAG00000054879		7.30299	7.06146	1.98696	lncRNA	Up
ENSBTAG00000054931	CACNG4	8.18116	7.83211	2.87486	protein_coding	Up
ENSBTAG00000055030		7.60477	7.3671	1.95514	protein_coding	Up
ENSBTAG00000055167		5.04172	5.3275	-2.36734	lncRNA	Down
ENSBTAG00000055259		5.10618	4.70413	3.3125	protein_coding	Up
