# Supplementary material for: Supranutritional Maternal Organic Selenium Supplementation during Different Trimesters of Pregnancy Affects the Muscle Gene Transcriptome of Newborn Beef Calves in a Time-Dependent Manner
Source: Genes (Basel). 2021 Nov 25;12(12):1884. doi: 10.3390/genes12121884 (PMC8701265; doi:10.3390/genes12121884)
Supplement: Supplementary file 1 [file genes-12-01884-s001.zip › Supplementary Table S5_.xlsx]

## Sheet: Description
Supranutritional Maternal Organic Selenium Supplementation During Different Trimesters of Pregnancy Affects the Muscle Gene Transcriptome of Newborn Beef Calves in a Time-dependent Manner
Wellison J. S. Diniz 1,*; Gerd Bobe 2,3; Joseph J. Klopfenstein 4; Yunus Gultekin 2; T. Zane Davis 5; Alison K. Ward 6; Jean A. Hall 7,*
1 Department of Animal Sciences, Auburn University; Auburn, AL 3849, USA; wzd0027@auburn.edu 2 Department of Animal and Rangeland Sciences, College of Agricultural Sciences, Oregon State University, Corvallis, OR, USA; yunus.gultekin@oregonstate.edu; gerd.bobe@oregonstate.edu 3 Linus Pauling Institute, Oregon State University, Corvallis, OR 97331, USA; 4 Department of Clinical Sciences, Carlson C…
Data Description
Tab 1.	Over-represented biological processes of protein coding differentially expressed genes for each of the group contrasts from muscle tissue.

## Sheet: Tab. 1
A - Over-represented biological processes of protein coding DEGs between TR1 vs. CTR groups from muscle tissue
GO ID	Functional Category	Enrichment Ratio	FDR	Ensembl ID
GO:0061061	Muscle structure development	2.56383	3.38082e-08	ENSBTAG00000015538;ENSBTAG00000013029;ENSBTAG00000020330;ENSBTAG00000010401;ENSBTAG00000046017;ENSBTAG00000014614;ENSBTAG00000021435;ENSBTAG00000008545;ENSBTAG00000004879;ENSBTAG00000005078;ENSBTAG00000014824;ENSBTAG00000014791;ENSBTAG00000001398;ENSBTAG00000011734;ENSBTAG00000021048;ENSBTAG00000011909;ENSBTAG00000005812;ENSBTAG00000020035;ENSBTAG00000001725;ENSBTAG00000040338;ENSBTAG00000014003;…
GO:0044283	Small molecule biosynthetic process	2.15529	1.35429e-06	ENSBTAG00000006608;ENSBTAG00000001936;ENSBTAG00000020747;ENSBTAG00000004248;ENSBTAG00000013631;ENSBTAG00000046900;ENSBTAG00000020698;ENSBTAG00000008545;ENSBTAG00000011463;ENSBTAG00000003483;ENSBTAG00000014791;ENSBTAG00000021272;ENSBTAG00000008541;ENSBTAG00000015314;ENSBTAG00000011709;ENSBTAG00000014476;ENSBTAG00000021859;ENSBTAG00000011832;ENSBTAG00000016650;ENSBTAG00000009231;ENSBTAG00000019782;…
GO:0060537	Muscle tissue development	2.5374	2.39463e-05	ENSBTAG00000015538;ENSBTAG00000013029;ENSBTAG00000010401;ENSBTAG00000046017;ENSBTAG00000014614;ENSBTAG00000021435;ENSBTAG00000008545;ENSBTAG00000008010;ENSBTAG00000020689;ENSBTAG00000011734;ENSBTAG00000011909;ENSBTAG00000005812;ENSBTAG00000020035;ENSBTAG00000040338;ENSBTAG00000014003;ENSBTAG00000018358;ENSBTAG00000015996;ENSBTAG00000011390;ENSBTAG00000000231;ENSBTAG00000025853;ENSBTAG00000000329;…
GO:0051186	Cofactor metabolic process	2.12913	0.000104426	ENSBTAG00000015582;ENSBTAG00000010371;ENSBTAG00000006608;ENSBTAG00000015509;ENSBTAG00000015094;ENSBTAG00000004248;ENSBTAG00000046900;ENSBTAG00000000251;ENSBTAG00000020698;ENSBTAG00000020980;ENSBTAG00000022564;ENSBTAG00000011667;ENSBTAG00000008541;ENSBTAG00000021859;ENSBTAG00000016650;ENSBTAG00000011045;ENSBTAG00000013178;ENSBTAG00000002980;ENSBTAG00000014918;ENSBTAG00000019782;ENSBTAG00000004881;…
GO:0043269	Regulation of ion transport	2.08835	0.000324024	ENSBTAG00000016768;ENSBTAG00000018841;ENSBTAG00000001801;ENSBTAG00000004751;ENSBTAG00000007148;ENSBTAG00000010026;ENSBTAG00000011479;ENSBTAG00000013065;ENSBTAG00000010812;ENSBTAG00000001823;ENSBTAG00000005115;ENSBTAG00000043948;ENSBTAG00000013861;ENSBTAG00000018421;ENSBTAG00000003014;ENSBTAG00000018520;ENSBTAG00000021808;ENSBTAG00000002036;ENSBTAG00000007547;ENSBTAG00000001575;ENSBTAG00000001725;…
GO:0006520	Cellular amino acid metabolic process	2.32745	0.000411169	ENSBTAG00000006608;ENSBTAG00000012338;ENSBTAG00000020747;ENSBTAG00000013631;ENSBTAG00000033367;ENSBTAG00000046900;ENSBTAG00000020698;ENSBTAG00000014791;ENSBTAG00000034776;ENSBTAG00000001945;ENSBTAG00000015314;ENSBTAG00000012962;ENSBTAG00000011832;ENSBTAG00000018972;ENSBTAG00000002980;ENSBTAG00000007835;ENSBTAG00000001116;ENSBTAG00000000160;ENSBTAG00000007943;ENSBTAG00000008172;ENSBTAG00000006928;…
GO:0003012	Muscle system process	2.33454	0.0012829	ENSBTAG00000016768;ENSBTAG00000010026;ENSBTAG00000010812;ENSBTAG00000020689;ENSBTAG00000001609;ENSBTAG00000001398;ENSBTAG00000002078;ENSBTAG00000018520;ENSBTAG00000007090;ENSBTAG00000001575;ENSBTAG00000040338;ENSBTAG00000018358;ENSBTAG00000003826;ENSBTAG00000009707;ENSBTAG00000024888;ENSBTAG00000025853;ENSBTAG00000022699;ENSBTAG00000001465;ENSBTAG00000006030;ENSBTAG00000012777;ENSBTAG00000005373;…
GO:0032787	Monocarboxylic acid metabolic process	1.91339	0.00206336	ENSBTAG00000004860;ENSBTAG00000038321;ENSBTAG00000038464;ENSBTAG00000006608;ENSBTAG00000001864;ENSBTAG00000012338;ENSBTAG00000015094;ENSBTAG00000037526;ENSBTAG00000001936;ENSBTAG00000004248;ENSBTAG00000011463;ENSBTAG00000021999;ENSBTAG00000005738;ENSBTAG00000022564;ENSBTAG00000016819;ENSBTAG00000007002;ENSBTAG00000030174;ENSBTAG00000007512;ENSBTAG00000004344;ENSBTAG00000008541;ENSBTAG00000019625;…
GO:0046434	Organophosphate catabolic process	2.68113	0.00206336	ENSBTAG00000004248;ENSBTAG00000011479;ENSBTAG00000003483;ENSBTAG00000007512;ENSBTAG00000011709;ENSBTAG00000016650;ENSBTAG00000019782;ENSBTAG00000013411;ENSBTAG00000008406;ENSBTAG00000024888;ENSBTAG00000005534;ENSBTAG00000001601;ENSBTAG00000008895;ENSBTAG00000019684;ENSBTAG00000012314;ENSBTAG00000013492;ENSBTAG00000016296;ENSBTAG00000014547;ENSBTAG00000006396;ENSBTAG00000000894
GO:0006575	Cellular modified amino acid metabolic process	2.70626	0.00252013	ENSBTAG00000010371;ENSBTAG00000006608;ENSBTAG00000015094;ENSBTAG00000020747;ENSBTAG00000046900;ENSBTAG00000031209;ENSBTAG00000020698;ENSBTAG00000021999;ENSBTAG00000011667;ENSBTAG00000008541;ENSBTAG00000013921;ENSBTAG00000004881;ENSBTAG00000011908;ENSBTAG00000001116;ENSBTAG00000008172;ENSBTAG00000009846;ENSBTAG00000004112;ENSBTAG00000005586;ENSBTAG00000021516
B - Over-represented biological processes of protein coding DEGs between TR2 vs. CTR groups from muscle tissue
GO ID	Functional Category	Enrichment Ratio	FDR	Ensembl ID
GO:0061061	Muscle structure development	2.12123	0.000327008	ENSBTAG00000000329;ENSBTAG00000000396;ENSBTAG00000001058;ENSBTAG00000001725;ENSBTAG00000002216;ENSBTAG00000002283;ENSBTAG00000002333;ENSBTAG00000003994;ENSBTAG00000004322;ENSBTAG00000004602;ENSBTAG00000004879;ENSBTAG00000005604;ENSBTAG00000005714;ENSBTAG00000007173;ENSBTAG00000007766;ENSBTAG00000008545;ENSBTAG00000008849;ENSBTAG00000009663;ENSBTAG00000010741;ENSBTAG00000011500;ENSBTAG00000011734;…
GO:1901615	Organic hydroxy compound metabolic process	2.23757	0.000327008	ENSBTAG00000001936;ENSBTAG00000001992;ENSBTAG00000002101;ENSBTAG00000002258;ENSBTAG00000003068;ENSBTAG00000003948;ENSBTAG00000004688;ENSBTAG00000005498;ENSBTAG00000005738;ENSBTAG00000006821;ENSBTAG00000007447;ENSBTAG00000008103;ENSBTAG00000008743;ENSBTAG00000009265;ENSBTAG00000009287;ENSBTAG00000009770;ENSBTAG00000011866;ENSBTAG00000011908;ENSBTAG00000011934;ENSBTAG00000011960;ENSBTAG00000012212;…
GO:0010942	Positive regulation of cell death	2.03187	0.00110643	ENSBTAG00000000095;ENSBTAG00000000163;ENSBTAG00000000428;ENSBTAG00000001096;ENSBTAG00000001864;ENSBTAG00000001933;ENSBTAG00000003033;ENSBTAG00000003994;ENSBTAG00000004037;ENSBTAG00000004587;ENSBTAG00000006354;ENSBTAG00000006505;ENSBTAG00000007766;ENSBTAG00000008409;ENSBTAG00000008545;ENSBTAG00000009786;ENSBTAG00000009844;ENSBTAG00000011179;ENSBTAG00000011234;ENSBTAG00000011266;ENSBTAG00000011734;…
GO:0044283	Small molecule biosynthetic process	1.82973	0.00185115	ENSBTAG00000000042;ENSBTAG00000000163;ENSBTAG00000000286;ENSBTAG00000001417;ENSBTAG00000001936;ENSBTAG00000001992;ENSBTAG00000002126;ENSBTAG00000002258;ENSBTAG00000003222;ENSBTAG00000003948;ENSBTAG00000004112;ENSBTAG00000004248;ENSBTAG00000004688;ENSBTAG00000005178;ENSBTAG00000005586;ENSBTAG00000005744;ENSBTAG00000005835;ENSBTAG00000006716;ENSBTAG00000006977;ENSBTAG00000007447;ENSBTAG00000008419;…
GO:0060537	Muscle tissue development	2.21865	0.00188392	ENSBTAG00000000329;ENSBTAG00000000396;ENSBTAG00000001058;ENSBTAG00000002216;ENSBTAG00000002283;ENSBTAG00000004036;ENSBTAG00000004322;ENSBTAG00000004602;ENSBTAG00000005604;ENSBTAG00000005714;ENSBTAG00000006138;ENSBTAG00000007173;ENSBTAG00000007766;ENSBTAG00000008545;ENSBTAG00000009663;ENSBTAG00000010741;ENSBTAG00000011734;ENSBTAG00000011869;ENSBTAG00000012212;ENSBTAG00000013029;ENSBTAG00000014003;…
GO:0043062	Extracellular structure organization	2.31407	0.00678925	ENSBTAG00000000087;ENSBTAG00000000182;ENSBTAG00000001027;ENSBTAG00000001745;ENSBTAG00000002258;ENSBTAG00000007173;ENSBTAG00000009513;ENSBTAG00000009844;ENSBTAG00000010175;ENSBTAG00000010793;ENSBTAG00000012393;ENSBTAG00000012409;ENSBTAG00000013103;ENSBTAG00000013472;ENSBTAG00000013662;ENSBTAG00000014665;ENSBTAG00000014912;ENSBTAG00000017135;ENSBTAG00000020661;ENSBTAG00000021176;ENSBTAG00000021211;…
GO:0071496	Cellular response to external stimulus	2.33174	0.0101222	ENSBTAG00000000396;ENSBTAG00000000428;ENSBTAG00000002216;ENSBTAG00000003222;ENSBTAG00000004322;ENSBTAG00000006135;ENSBTAG00000006765;ENSBTAG00000007084;ENSBTAG00000008353;ENSBTAG00000008419;ENSBTAG00000008545;ENSBTAG00000009617;ENSBTAG00000011632;ENSBTAG00000011734;ENSBTAG00000011765;ENSBTAG00000012409;ENSBTAG00000013103;ENSBTAG00000013631;ENSBTAG00000013860;ENSBTAG00000014972;ENSBTAG00000016414;…
GO:0006520	Cellular amino acid metabolic process	2.06789	0.010324	ENSBTAG00000000042;ENSBTAG00000000974;ENSBTAG00000002321;ENSBTAG00000002980;ENSBTAG00000003222;ENSBTAG00000004112;ENSBTAG00000004358;ENSBTAG00000004679;ENSBTAG00000005586;ENSBTAG00000005835;ENSBTAG00000006579;ENSBTAG00000006765;ENSBTAG00000006795;ENSBTAG00000007315;ENSBTAG00000007835;ENSBTAG00000011960;ENSBTAG00000012962;ENSBTAG00000013081;ENSBTAG00000013631;ENSBTAG00000013825;ENSBTAG00000013960;…
GO:0031589	Cell-substrate adhesion	2.21765	0.0121504	ENSBTAG00000000087;ENSBTAG00000001922;ENSBTAG00000002258;ENSBTAG00000002283;ENSBTAG00000006367;ENSBTAG00000007766;ENSBTAG00000008300;ENSBTAG00000009080;ENSBTAG00000009844;ENSBTAG00000010793;ENSBTAG00000012082;ENSBTAG00000012265;ENSBTAG00000013103;ENSBTAG00000013662;ENSBTAG00000014465;ENSBTAG00000016549;ENSBTAG00000018790;ENSBTAG00000019289;ENSBTAG00000019627;ENSBTAG00000020417;ENSBTAG00000024081;…
GO:0008202	Steroid metabolic process	2.15111	0.0229557	ENSBTAG00000001035;ENSBTAG00000001992;ENSBTAG00000002258;ENSBTAG00000003068;ENSBTAG00000003948;ENSBTAG00000004688;ENSBTAG00000005498;ENSBTAG00000005738;ENSBTAG00000007173;ENSBTAG00000009265;ENSBTAG00000009287;ENSBTAG00000010069;ENSBTAG00000012212;ENSBTAG00000012314;ENSBTAG00000012393;ENSBTAG00000016414;ENSBTAG00000016465;ENSBTAG00000016886;ENSBTAG00000017819;ENSBTAG00000020661;ENSBTAG00000021272;…
C - Over-represented biological processes of protein coding DEGs between TR3 vs. CTR groups from muscle tissue
GO ID	Functional Category	Enrichment Ratio	FDR	Ensembl ID
GO:0007507	Heart development	2.26356	0.000348274	ENSBTAG00000000919;ENSBTAG00000001835;ENSBTAG00000002261;ENSBTAG00000002283;ENSBTAG00000002333;ENSBTAG00000003257;ENSBTAG00000004036;ENSBTAG00000004587;ENSBTAG00000005359;ENSBTAG00000005748;ENSBTAG00000005787;ENSBTAG00000005812;ENSBTAG00000007173;ENSBTAG00000008197;ENSBTAG00000008394;ENSBTAG00000008406;ENSBTAG00000009844;ENSBTAG00000010422;ENSBTAG00000010820;ENSBTAG00000011224;ENSBTAG00000011734;…
GO:1990845	Adaptive thermogenesis	3.52145	0.000408322	ENSBTAG00000001139;ENSBTAG00000001609;ENSBTAG00000001835;ENSBTAG00000002144;ENSBTAG00000003692;ENSBTAG00000005259;ENSBTAG00000006335;ENSBTAG00000007116;ENSBTAG00000008026;ENSBTAG00000010564;ENSBTAG00000013029;ENSBTAG00000016169;ENSBTAG00000016615;ENSBTAG00000017086;ENSBTAG00000017326;ENSBTAG00000017397;ENSBTAG00000031750;ENSBTAG00000048062
GO:0040007	Growth	1.69639	0.00926354	ENSBTAG00000000919;ENSBTAG00000001471;ENSBTAG00000001687;ENSBTAG00000001801;ENSBTAG00000001835;ENSBTAG00000002144;ENSBTAG00000002174;ENSBTAG00000002216;ENSBTAG00000002283;ENSBTAG00000002333;ENSBTAG00000002661;ENSBTAG00000003253;ENSBTAG00000003257;ENSBTAG00000003848;ENSBTAG00000004475;ENSBTAG00000004587;ENSBTAG00000004751;ENSBTAG00000004822;ENSBTAG00000005359;ENSBTAG00000005748;ENSBTAG00000005812;…
GO:0045597	Positive regulation of cell differentiation	1.68401	0.00926354	ENSBTAG00000001801;ENSBTAG00000001835;ENSBTAG00000002216;ENSBTAG00000002333;ENSBTAG00000002661;ENSBTAG00000003257;ENSBTAG00000003779;ENSBTAG00000004322;ENSBTAG00000004787;ENSBTAG00000004822;ENSBTAG00000005138;ENSBTAG00000005359;ENSBTAG00000005474;ENSBTAG00000005748;ENSBTAG00000005998;ENSBTAG00000006030;ENSBTAG00000006161;ENSBTAG00000006466;ENSBTAG00000006738;ENSBTAG00000007334;ENSBTAG00000008271;…
GO:0048871	Multicellular organismal homeostasis	1.9821	0.00926354	ENSBTAG00000000687;ENSBTAG00000001139;ENSBTAG00000001609;ENSBTAG00000001835;ENSBTAG00000001864;ENSBTAG00000002096;ENSBTAG00000002144;ENSBTAG00000003692;ENSBTAG00000003822;ENSBTAG00000004787;ENSBTAG00000004862;ENSBTAG00000005504;ENSBTAG00000006335;ENSBTAG00000007116;ENSBTAG00000008026;ENSBTAG00000010564;ENSBTAG00000012222;ENSBTAG00000013029;ENSBTAG00000013065;ENSBTAG00000016169;ENSBTAG00000016615;…
GO:0061061	Muscle structure development	1.85447	0.00926354	ENSBTAG00000000507;ENSBTAG00000000919;ENSBTAG00000001398;ENSBTAG00000001835;ENSBTAG00000002216;ENSBTAG00000002283;ENSBTAG00000002333;ENSBTAG00000002574;ENSBTAG00000004322;ENSBTAG00000004602;ENSBTAG00000005078;ENSBTAG00000005138;ENSBTAG00000005748;ENSBTAG00000005812;ENSBTAG00000006030;ENSBTAG00000006466;ENSBTAG00000006694;ENSBTAG00000006800;ENSBTAG00000007173;ENSBTAG00000008394;ENSBTAG00000008545;…
GO:0003013	Circulatory system process	1.98471	0.0121812	ENSBTAG00000000919;ENSBTAG00000001398;ENSBTAG00000001609;ENSBTAG00000001687;ENSBTAG00000001835;ENSBTAG00000002144;ENSBTAG00000002333;ENSBTAG00000003253;ENSBTAG00000004751;ENSBTAG00000005163;ENSBTAG00000005359;ENSBTAG00000005464;ENSBTAG00000006139;ENSBTAG00000006432;ENSBTAG00000008294;ENSBTAG00000008394;ENSBTAG00000008406;ENSBTAG00000010422;ENSBTAG00000010551;ENSBTAG00000011461;ENSBTAG00000011869;…
GO:0032989	Cellular component morphogenesis	1.60285	0.0121812	ENSBTAG00000001687;ENSBTAG00000001801;ENSBTAG00000001835;ENSBTAG00000001864;ENSBTAG00000001922;ENSBTAG00000002283;ENSBTAG00000002574;ENSBTAG00000002661;ENSBTAG00000003257;ENSBTAG00000003526;ENSBTAG00000003650;ENSBTAG00000004475;ENSBTAG00000004751;ENSBTAG00000004777;ENSBTAG00000005078;ENSBTAG00000005138;ENSBTAG00000005145;ENSBTAG00000005278;ENSBTAG00000005313;ENSBTAG00000005359;ENSBTAG00000005710;…
GO:0022603	Regulation of anatomical structure morphogenesis	1.60438	0.0121812	ENSBTAG00000000919;ENSBTAG00000001801;ENSBTAG00000002216;ENSBTAG00000002283;ENSBTAG00000002661;ENSBTAG00000003526;ENSBTAG00000004475;ENSBTAG00000004679;ENSBTAG00000005138;ENSBTAG00000005313;ENSBTAG00000005359;ENSBTAG00000005482;ENSBTAG00000005748;ENSBTAG00000006030;ENSBTAG00000006161;ENSBTAG00000006466;ENSBTAG00000007148;ENSBTAG00000008028;ENSBTAG00000010820;ENSBTAG00000011224;ENSBTAG00000011580;…
GO:0044057	Regulation of system process	1.96572	0.0121812	ENSBTAG00000000919;ENSBTAG00000001398;ENSBTAG00000001687;ENSBTAG00000001835;ENSBTAG00000002144;ENSBTAG00000002333;ENSBTAG00000004036;ENSBTAG00000004751;ENSBTAG00000005163;ENSBTAG00000005359;ENSBTAG00000006030;ENSBTAG00000006139;ENSBTAG00000006276;ENSBTAG00000006432;ENSBTAG00000008294;ENSBTAG00000008394;ENSBTAG00000008940;ENSBTAG00000010422;ENSBTAG00000010551;ENSBTAG00000011461;ENSBTAG00000011869;…
