# Supplementary material for: Supranutritional Maternal Organic Selenium Supplementation during Different Trimesters of Pregnancy Affects the Muscle Gene Transcriptome of Newborn Beef Calves in a Time-Dependent Manner
Source: Genes (Basel). 2021 Nov 25;12(12):1884. doi: 10.3390/genes12121884 (PMC8701265; doi:10.3390/genes12121884)
Supplement: Supplementary file 1 [file genes-12-01884-s001.zip › Supplementary Table S6_.xlsx]

## Sheet: Description
Supranutritional Maternal Organic Selenium Supplementation During Different Trimesters of Pregnancy Affects the Muscle Gene Transcriptome of Newborn Beef Calves in a Time-dependent Manner
Wellison J. S. Diniz 1,*; Gerd Bobe 2,3; Joseph J. Klopfenstein 4; Yunus Gultekin 2; T. Zane Davis 5; Alison K. Ward 6; Jean A. Hall 7,*
1 Department of Animal Sciences, Auburn University; Auburn, AL 3849, USA; wzd0027@auburn.edu 2 Department of Animal and Rangeland Sciences, College of Agricultural Sciences, Oregon State University, Corvallis, OR, USA; yunus.gultekin@oregonstate.edu; gerd.bobe@oregonstate.edu 3 Linus Pauling Institute, Oregon State University, Corvallis, OR 97331, USA; 4 Department of Clinical Sciences, Carlson C…
Data Description
Tab 1.	Over-represented biological processes of upregulated genes for each of the group contrasts from muscle tissue.

## Sheet: Tab. 1
Over-represented biological processes of upregulated genes for each of the group contrasts from muscle tissue.
TR1 vs. CTR
TR2 vs. CTR
TR3 vs. CTR
TR1 vs. CTR - Upregulatd genes
Functional Category	Enrichment FDR	Genes in list	Genes
Negative regulation of biological process	1.26207e-05	189	ENSBTAG00000000223 ENSBTAG00000001153 ENSBTAG00000002006 ENSBTAG00000002531 ENSBTAG00000003015 ENSBTAG00000003166 ENSBTAG00000004275 ENSBTAG00000004879 ENSBTAG00000005412 ENSBTAG00000005913 ENSBTAG00000007554 ENSBTAG00000008138 ENSBTAG00000011234 ENSBTAG00000011479 ENSBTAG00000011628 ENSBTAG00000011677 ENSBTAG00000011975 ENSBTAG00000012393 ENSBTAG00000012508 ENSBTAG00000014881 ENSBTAG00000015538 …
Response to oxygen-containing compound	5.61243e-05	62	ENSBTAG00000001335 ENSBTAG00000001864 ENSBTAG00000001936 ENSBTAG00000003015 ENSBTAG00000004879 ENSBTAG00000007689 ENSBTAG00000011234 ENSBTAG00000011479 ENSBTAG00000012019 ENSBTAG00000014972 ENSBTAG00000015032 ENSBTAG00000020980 ENSBTAG00000021527 ENSBTAG00000022622 ENSBTAG00000023600 ENSBTAG00000044105 ENSBTAG00000046900 ENSBTAG00000000746 ENSBTAG00000002006 ENSBTAG00000003166 ENSBTAG00000005260 …
Negative regulation of cellular process	5.61243e-05	170	ENSBTAG00000000223 ENSBTAG00000001153 ENSBTAG00000002531 ENSBTAG00000003015 ENSBTAG00000003166 ENSBTAG00000004275 ENSBTAG00000004879 ENSBTAG00000005412 ENSBTAG00000007554 ENSBTAG00000008138 ENSBTAG00000011234 ENSBTAG00000011479 ENSBTAG00000011628 ENSBTAG00000011677 ENSBTAG00000011975 ENSBTAG00000012393 ENSBTAG00000012508 ENSBTAG00000014881 ENSBTAG00000015538 ENSBTAG00000018421 ENSBTAG00000020330 …
Response to insulin	6.12651e-05	21	ENSBTAG00000001936 ENSBTAG00000004879 ENSBTAG00000007689 ENSBTAG00000011234 ENSBTAG00000011479 ENSBTAG00000012019 ENSBTAG00000022622 ENSBTAG00000044105 ENSBTAG00000000746 ENSBTAG00000007884 ENSBTAG00000008313 ENSBTAG00000015988 ENSBTAG00000053310 ENSBTAG00000003177 ENSBTAG00000007330 ENSBTAG00000010664 ENSBTAG00000014069 ENSBTAG00000021527 ENSBTAG00000027654 ENSBTAG00000045925 ENSBTAG00000052213
Cellular response to oxygen-containing compound	0.000242086	49	ENSBTAG00000001335 ENSBTAG00000001864 ENSBTAG00000001936 ENSBTAG00000003015 ENSBTAG00000004879 ENSBTAG00000007689 ENSBTAG00000011234 ENSBTAG00000011479 ENSBTAG00000012019 ENSBTAG00000014972 ENSBTAG00000015032 ENSBTAG00000021527 ENSBTAG00000022622 ENSBTAG00000044105 ENSBTAG00000000746 ENSBTAG00000003166 ENSBTAG00000005260 ENSBTAG00000007884 ENSBTAG00000011628 ENSBTAG00000012450 ENSBTAG00000015988 …
Response to peptide hormone	0.00025211	23	ENSBTAG00000001335 ENSBTAG00000001864 ENSBTAG00000001936 ENSBTAG00000004879 ENSBTAG00000007689 ENSBTAG00000011234 ENSBTAG00000011479 ENSBTAG00000012019 ENSBTAG00000022622 ENSBTAG00000044105 ENSBTAG00000000746 ENSBTAG00000007884 ENSBTAG00000008313 ENSBTAG00000015988 ENSBTAG00000053310 ENSBTAG00000003177 ENSBTAG00000007330 ENSBTAG00000010664 ENSBTAG00000014069 ENSBTAG00000021527 ENSBTAG00000027654 …
Cellular response to insulin stimulus	0.000259184	18	ENSBTAG00000001936 ENSBTAG00000004879 ENSBTAG00000007689 ENSBTAG00000011234 ENSBTAG00000011479 ENSBTAG00000012019 ENSBTAG00000022622 ENSBTAG00000044105 ENSBTAG00000000746 ENSBTAG00000007884 ENSBTAG00000015988 ENSBTAG00000053310 ENSBTAG00000003177 ENSBTAG00000010664 ENSBTAG00000014069 ENSBTAG00000021527 ENSBTAG00000027654 ENSBTAG00000052213
Response to peptide	0.000312493	25	ENSBTAG00000001335 ENSBTAG00000001864 ENSBTAG00000001936 ENSBTAG00000004879 ENSBTAG00000007689 ENSBTAG00000011234 ENSBTAG00000011479 ENSBTAG00000012019 ENSBTAG00000022622 ENSBTAG00000044105 ENSBTAG00000000746 ENSBTAG00000007884 ENSBTAG00000008313 ENSBTAG00000015988 ENSBTAG00000053310 ENSBTAG00000003177 ENSBTAG00000004989 ENSBTAG00000007330 ENSBTAG00000010664 ENSBTAG00000014069 ENSBTAG00000016683 …
Fatty acid metabolic process	0.000312493	26	ENSBTAG00000001936 ENSBTAG00000004893 ENSBTAG00000007689 ENSBTAG00000022564 ENSBTAG00000030174 ENSBTAG00000039686 ENSBTAG00000004344 ENSBTAG00000007507 ENSBTAG00000021999 ENSBTAG00000038321 ENSBTAG00000052213 ENSBTAG00000053310 ENSBTAG00000001864 ENSBTAG00000004248 ENSBTAG00000004860 ENSBTAG00000006608 ENSBTAG00000007512 ENSBTAG00000009153 ENSBTAG00000011463 ENSBTAG00000012019 ENSBTAG00000014069 …
Cellular response to peptide hormone stimulus	0.000567526	20	ENSBTAG00000001335 ENSBTAG00000001864 ENSBTAG00000001936 ENSBTAG00000004879 ENSBTAG00000007689 ENSBTAG00000011234 ENSBTAG00000011479 ENSBTAG00000012019 ENSBTAG00000022622 ENSBTAG00000044105 ENSBTAG00000000746 ENSBTAG00000007884 ENSBTAG00000015988 ENSBTAG00000053310 ENSBTAG00000003177 ENSBTAG00000010664 ENSBTAG00000014069 ENSBTAG00000021527 ENSBTAG00000027654 ENSBTAG00000052213
Regulation of fatty acid metabolic process	0.000627458	11	ENSBTAG00000001864 ENSBTAG00000004248 ENSBTAG00000009153 ENSBTAG00000011463 ENSBTAG00000012019 ENSBTAG00000014069 ENSBTAG00000022058 ENSBTAG00000030208 ENSBTAG00000038464 ENSBTAG00000007884 ENSBTAG00000052213
Cellular response to chemical stimulus	0.000627458	107	ENSBTAG00000001335 ENSBTAG00000001801 ENSBTAG00000001864 ENSBTAG00000001936 ENSBTAG00000002233 ENSBTAG00000002699 ENSBTAG00000003015 ENSBTAG00000004879 ENSBTAG00000007689 ENSBTAG00000010419 ENSBTAG00000011234 ENSBTAG00000011479 ENSBTAG00000011909 ENSBTAG00000012019 ENSBTAG00000014972 ENSBTAG00000015032 ENSBTAG00000015538 ENSBTAG00000018474 ENSBTAG00000021521 ENSBTAG00000021527 ENSBTAG00000022622 …
Lipid localization	0.000658753	27	ENSBTAG00000002747 ENSBTAG00000005738 ENSBTAG00000006921 ENSBTAG00000020661 ENSBTAG00000021272 ENSBTAG00000027081 ENSBTAG00000002006 ENSBTAG00000004344 ENSBTAG00000005260 ENSBTAG00000052213 ENSBTAG00000001410 ENSBTAG00000004494 ENSBTAG00000004860 ENSBTAG00000005144 ENSBTAG00000005718 ENSBTAG00000006471 ENSBTAG00000010482 ENSBTAG00000012019 ENSBTAG00000012981 ENSBTAG00000016378 ENSBTAG00000016683 …
Response to hormone	0.000674228	38	ENSBTAG00000001335 ENSBTAG00000001864 ENSBTAG00000001936 ENSBTAG00000004879 ENSBTAG00000007689 ENSBTAG00000011234 ENSBTAG00000011479 ENSBTAG00000012019 ENSBTAG00000014972 ENSBTAG00000022622 ENSBTAG00000044105 ENSBTAG00000046900 ENSBTAG00000000746 ENSBTAG00000005260 ENSBTAG00000007884 ENSBTAG00000008313 ENSBTAG00000011628 ENSBTAG00000015016 ENSBTAG00000015988 ENSBTAG00000053310 ENSBTAG00000002699 …
Transmembrane receptor protein tyrosine kinase signaling pathway	0.000908738	34	ENSBTAG00000001335 ENSBTAG00000002699 ENSBTAG00000003166 ENSBTAG00000004879 ENSBTAG00000011234 ENSBTAG00000011479 ENSBTAG00000011628 ENSBTAG00000012019 ENSBTAG00000021527 ENSBTAG00000022622 ENSBTAG00000044105 ENSBTAG00000002006 ENSBTAG00000007884 ENSBTAG00000012393 ENSBTAG00000012519 ENSBTAG00000052213 ENSBTAG00000001857 ENSBTAG00000001864 ENSBTAG00000010664 ENSBTAG00000014069 ENSBTAG00000014585 …
Enzyme linked receptor protein signaling pathway	0.00120989	46	ENSBTAG00000001335 ENSBTAG00000002699 ENSBTAG00000003166 ENSBTAG00000004879 ENSBTAG00000011234 ENSBTAG00000011479 ENSBTAG00000011628 ENSBTAG00000011909 ENSBTAG00000012019 ENSBTAG00000015538 ENSBTAG00000021527 ENSBTAG00000022622 ENSBTAG00000044105 ENSBTAG00000002006 ENSBTAG00000003018 ENSBTAG00000007884 ENSBTAG00000012393 ENSBTAG00000012519 ENSBTAG00000021687 ENSBTAG00000052213 ENSBTAG00000001857 …
Lipid metabolic process	0.0012902	59	ENSBTAG00000001936 ENSBTAG00000004893 ENSBTAG00000005144 ENSBTAG00000007689 ENSBTAG00000011479 ENSBTAG00000018984 ENSBTAG00000022564 ENSBTAG00000022622 ENSBTAG00000023600 ENSBTAG00000024493 ENSBTAG00000025161 ENSBTAG00000030174 ENSBTAG00000039686 ENSBTAG00000048059 ENSBTAG00000004344 ENSBTAG00000005260 ENSBTAG00000007507 ENSBTAG00000007884 ENSBTAG00000007888 ENSBTAG00000010419 ENSBTAG00000012393 …
Response to endogenous stimulus	0.00141087	59	ENSBTAG00000001335 ENSBTAG00000001864 ENSBTAG00000001936 ENSBTAG00000003015 ENSBTAG00000004879 ENSBTAG00000007689 ENSBTAG00000011234 ENSBTAG00000011479 ENSBTAG00000011909 ENSBTAG00000012019 ENSBTAG00000014972 ENSBTAG00000015538 ENSBTAG00000022622 ENSBTAG00000044105 ENSBTAG00000046900 ENSBTAG00000000746 ENSBTAG00000002006 ENSBTAG00000003018 ENSBTAG00000005260 ENSBTAG00000007884 ENSBTAG00000008313 …
Cellular response to nitrogen starvation	0.00152497	5	ENSBTAG00000006135 ENSBTAG00000011632 ENSBTAG00000011765 ENSBTAG00000014883 ENSBTAG00000035827
Positive regulation of cell death	0.00152497	31	ENSBTAG00000017804 ENSBTAG00000031106 ENSBTAG00000002006 ENSBTAG00000003604 ENSBTAG00000012393 ENSBTAG00000012450 ENSBTAG00000012519 ENSBTAG00000015655 ENSBTAG00000046218 ENSBTAG00000052213 ENSBTAG00000000243 ENSBTAG00000001864 ENSBTAG00000004989 ENSBTAG00000008010 ENSBTAG00000008353 ENSBTAG00000008545 ENSBTAG00000008625 ENSBTAG00000011234 ENSBTAG00000011266 ENSBTAG00000011734 ENSBTAG00000012508 …
Monocarboxylic acid metabolic process	0.00152497	31	ENSBTAG00000001936 ENSBTAG00000004893 ENSBTAG00000007689 ENSBTAG00000012338 ENSBTAG00000015094 ENSBTAG00000022564 ENSBTAG00000030174 ENSBTAG00000039686 ENSBTAG00000004344 ENSBTAG00000007002 ENSBTAG00000007507 ENSBTAG00000021999 ENSBTAG00000038321 ENSBTAG00000052213 ENSBTAG00000053310 ENSBTAG00000001864 ENSBTAG00000004248 ENSBTAG00000004860 ENSBTAG00000005738 ENSBTAG00000006608 ENSBTAG00000007512 …
Cellular response to hormone stimulus	0.00152497	33	ENSBTAG00000001335 ENSBTAG00000001864 ENSBTAG00000001936 ENSBTAG00000004879 ENSBTAG00000007689 ENSBTAG00000011234 ENSBTAG00000011479 ENSBTAG00000012019 ENSBTAG00000014972 ENSBTAG00000022622 ENSBTAG00000044105 ENSBTAG00000000746 ENSBTAG00000005260 ENSBTAG00000007884 ENSBTAG00000011628 ENSBTAG00000015016 ENSBTAG00000015988 ENSBTAG00000053310 ENSBTAG00000002699 ENSBTAG00000003177 ENSBTAG00000005464 …
Cellular response to nitrogen levels	0.00152497	5	ENSBTAG00000006135 ENSBTAG00000011632 ENSBTAG00000011765 ENSBTAG00000014883 ENSBTAG00000035827
Positive regulation of fatty acid metabolic process	0.00152497	7	ENSBTAG00000001864 ENSBTAG00000004248 ENSBTAG00000009153 ENSBTAG00000011463 ENSBTAG00000012019 ENSBTAG00000038464 ENSBTAG00000052213
Cellular response to organonitrogen compound	0.00152497	28	ENSBTAG00000001335 ENSBTAG00000001864 ENSBTAG00000001936 ENSBTAG00000003015 ENSBTAG00000004879 ENSBTAG00000007689 ENSBTAG00000011234 ENSBTAG00000011479 ENSBTAG00000012019 ENSBTAG00000022622 ENSBTAG00000044105 ENSBTAG00000000746 ENSBTAG00000007884 ENSBTAG00000011628 ENSBTAG00000012450 ENSBTAG00000015988 ENSBTAG00000044106 ENSBTAG00000051972 ENSBTAG00000053310 ENSBTAG00000003177 ENSBTAG00000005464 …
Cellular response to peptide	0.00170106	20	ENSBTAG00000001335 ENSBTAG00000001864 ENSBTAG00000001936 ENSBTAG00000004879 ENSBTAG00000007689 ENSBTAG00000011234 ENSBTAG00000011479 ENSBTAG00000012019 ENSBTAG00000022622 ENSBTAG00000044105 ENSBTAG00000000746 ENSBTAG00000007884 ENSBTAG00000015988 ENSBTAG00000053310 ENSBTAG00000003177 ENSBTAG00000010664 ENSBTAG00000014069 ENSBTAG00000021527 ENSBTAG00000027654 ENSBTAG00000052213
Regulation of cellular ketone metabolic process	0.00170106	12	ENSBTAG00000001864 ENSBTAG00000004248 ENSBTAG00000009153 ENSBTAG00000011463 ENSBTAG00000012019 ENSBTAG00000014069 ENSBTAG00000022058 ENSBTAG00000030208 ENSBTAG00000038464 ENSBTAG00000007884 ENSBTAG00000024603 ENSBTAG00000052213
Lipid modification	0.00170106	19	ENSBTAG00000004893 ENSBTAG00000011479 ENSBTAG00000018984 ENSBTAG00000022622 ENSBTAG00000030174 ENSBTAG00000007888 ENSBTAG00000012393 ENSBTAG00000052213 ENSBTAG00000053310 ENSBTAG00000001864 ENSBTAG00000004248 ENSBTAG00000004494 ENSBTAG00000011709 ENSBTAG00000012019 ENSBTAG00000014069 ENSBTAG00000022058 ENSBTAG00000023600 ENSBTAG00000038464 ENSBTAG00000021272
Negative regulation of cellular metabolic process	0.00170106	97	ENSBTAG00000004879 ENSBTAG00000007554 ENSBTAG00000008138 ENSBTAG00000011234 ENSBTAG00000011479 ENSBTAG00000011677 ENSBTAG00000011975 ENSBTAG00000012393 ENSBTAG00000014881 ENSBTAG00000018421 ENSBTAG00000021008 ENSBTAG00000024603 ENSBTAG00000027654 ENSBTAG00000040116 ENSBTAG00000044105 ENSBTAG00000000251 ENSBTAG00000000746 ENSBTAG00000002006 ENSBTAG00000006035 ENSBTAG00000006222 ENSBTAG00000007884 …
Response to starvation	0.00170106	15	ENSBTAG00000001936 ENSBTAG00000003015 ENSBTAG00000006135 ENSBTAG00000011632 ENSBTAG00000011765 ENSBTAG00000013065 ENSBTAG00000014883 ENSBTAG00000035827 ENSBTAG00000007884 ENSBTAG00000008353 ENSBTAG00000008545 ENSBTAG00000009617 ENSBTAG00000012987 ENSBTAG00000014069 ENSBTAG00000044105
TR2 vs. CTR - Upregulatd genes
Functional Category	Enrichment FDR	Genes in list	Genes
Positive regulation of biological process	9.41174e-16	235	ENSBTAG00000000328 ENSBTAG00000000377 ENSBTAG00000000570 ENSBTAG00000000977 ENSBTAG00000001294 ENSBTAG00000001562 ENSBTAG00000002216 ENSBTAG00000002258 ENSBTAG00000004037 ENSBTAG00000004237 ENSBTAG00000004879 ENSBTAG00000005312 ENSBTAG00000005412 ENSBTAG00000006487 ENSBTAG00000006645 ENSBTAG00000007084 ENSBTAG00000007599 ENSBTAG00000007689 ENSBTAG00000008121 ENSBTAG00000008330 ENSBTAG00000008419 …
Positive regulation of metabolic process	3.62294e-15	163	ENSBTAG00000000570 ENSBTAG00000001294 ENSBTAG00000001562 ENSBTAG00000002216 ENSBTAG00000002258 ENSBTAG00000004037 ENSBTAG00000004879 ENSBTAG00000005312 ENSBTAG00000005412 ENSBTAG00000006487 ENSBTAG00000007084 ENSBTAG00000007599 ENSBTAG00000007689 ENSBTAG00000008330 ENSBTAG00000008419 ENSBTAG00000009265 ENSBTAG00000010717 ENSBTAG00000011234 ENSBTAG00000011677 ENSBTAG00000012046 ENSBTAG00000012946 …
Positive regulation of cellular metabolic process	2.53087e-13	149	ENSBTAG00000000570 ENSBTAG00000001294 ENSBTAG00000001562 ENSBTAG00000002216 ENSBTAG00000002258 ENSBTAG00000004037 ENSBTAG00000004879 ENSBTAG00000006487 ENSBTAG00000007084 ENSBTAG00000007599 ENSBTAG00000007689 ENSBTAG00000008330 ENSBTAG00000009265 ENSBTAG00000010717 ENSBTAG00000011234 ENSBTAG00000011677 ENSBTAG00000012046 ENSBTAG00000012946 ENSBTAG00000013860 ENSBTAG00000014003 ENSBTAG00000014881 …
Positive regulation of RNA biosynthetic process	2.71579e-13	95	ENSBTAG00000001562 ENSBTAG00000002216 ENSBTAG00000004037 ENSBTAG00000004879 ENSBTAG00000007599 ENSBTAG00000007689 ENSBTAG00000009265 ENSBTAG00000010717 ENSBTAG00000011234 ENSBTAG00000011677 ENSBTAG00000012046 ENSBTAG00000012946 ENSBTAG00000014003 ENSBTAG00000015316 ENSBTAG00000015371 ENSBTAG00000017994 ENSBTAG00000018352 ENSBTAG00000018948 ENSBTAG00000031106 ENSBTAG00000040116 ENSBTAG00000044105 …
Positive regulation of nucleic acid-templated transcription	2.71579e-13	95	ENSBTAG00000001562 ENSBTAG00000002216 ENSBTAG00000004037 ENSBTAG00000004879 ENSBTAG00000007599 ENSBTAG00000007689 ENSBTAG00000009265 ENSBTAG00000010717 ENSBTAG00000011234 ENSBTAG00000011677 ENSBTAG00000012046 ENSBTAG00000012946 ENSBTAG00000014003 ENSBTAG00000015316 ENSBTAG00000015371 ENSBTAG00000017994 ENSBTAG00000018352 ENSBTAG00000018948 ENSBTAG00000031106 ENSBTAG00000040116 ENSBTAG00000044105 …
Regulation of transcription by RNA polymerase II	2.71579e-13	109	ENSBTAG00000002216 ENSBTAG00000004037 ENSBTAG00000004189 ENSBTAG00000004879 ENSBTAG00000005312 ENSBTAG00000007599 ENSBTAG00000007689 ENSBTAG00000008313 ENSBTAG00000009265 ENSBTAG00000009879 ENSBTAG00000010069 ENSBTAG00000010717 ENSBTAG00000011234 ENSBTAG00000011734 ENSBTAG00000012046 ENSBTAG00000012102 ENSBTAG00000012946 ENSBTAG00000014003 ENSBTAG00000014389 ENSBTAG00000015316 ENSBTAG00000015371 …
Positive regulation of macromolecule metabolic process	2.71579e-13	149	ENSBTAG00000000570 ENSBTAG00000001294 ENSBTAG00000001562 ENSBTAG00000002216 ENSBTAG00000004037 ENSBTAG00000004879 ENSBTAG00000005312 ENSBTAG00000005412 ENSBTAG00000006487 ENSBTAG00000007084 ENSBTAG00000007599 ENSBTAG00000007689 ENSBTAG00000008330 ENSBTAG00000008419 ENSBTAG00000009265 ENSBTAG00000010717 ENSBTAG00000011234 ENSBTAG00000011677 ENSBTAG00000012046 ENSBTAG00000012946 ENSBTAG00000013860 …
Positive regulation of RNA metabolic process	2.71579e-13	98	ENSBTAG00000001562 ENSBTAG00000002216 ENSBTAG00000004037 ENSBTAG00000004879 ENSBTAG00000007599 ENSBTAG00000007689 ENSBTAG00000009265 ENSBTAG00000010717 ENSBTAG00000011234 ENSBTAG00000011677 ENSBTAG00000012046 ENSBTAG00000012946 ENSBTAG00000014003 ENSBTAG00000015316 ENSBTAG00000015371 ENSBTAG00000017994 ENSBTAG00000018352 ENSBTAG00000018948 ENSBTAG00000031106 ENSBTAG00000040116 ENSBTAG00000044105 …
Positive regulation of biosynthetic process	2.7987e-13	106	ENSBTAG00000001562 ENSBTAG00000002216 ENSBTAG00000002258 ENSBTAG00000004037 ENSBTAG00000004879 ENSBTAG00000006487 ENSBTAG00000007599 ENSBTAG00000007689 ENSBTAG00000009265 ENSBTAG00000010717 ENSBTAG00000011234 ENSBTAG00000011677 ENSBTAG00000012046 ENSBTAG00000012946 ENSBTAG00000014003 ENSBTAG00000015316 ENSBTAG00000015371 ENSBTAG00000017994 ENSBTAG00000018352 ENSBTAG00000018948 ENSBTAG00000031106 …
Positive regulation of transcription, DNA-templated	3.35586e-13	92	ENSBTAG00000001562 ENSBTAG00000002216 ENSBTAG00000004037 ENSBTAG00000004879 ENSBTAG00000007599 ENSBTAG00000007689 ENSBTAG00000009265 ENSBTAG00000010717 ENSBTAG00000011234 ENSBTAG00000011677 ENSBTAG00000012046 ENSBTAG00000012946 ENSBTAG00000014003 ENSBTAG00000015316 ENSBTAG00000015371 ENSBTAG00000017994 ENSBTAG00000018352 ENSBTAG00000018948 ENSBTAG00000031106 ENSBTAG00000040116 ENSBTAG00000044105 …
Positive regulation of cellular process	3.35586e-13	204	ENSBTAG00000000328 ENSBTAG00000000570 ENSBTAG00000001294 ENSBTAG00000001562 ENSBTAG00000002216 ENSBTAG00000002258 ENSBTAG00000004037 ENSBTAG00000004237 ENSBTAG00000004879 ENSBTAG00000006487 ENSBTAG00000006645 ENSBTAG00000007084 ENSBTAG00000007599 ENSBTAG00000007689 ENSBTAG00000008121 ENSBTAG00000008330 ENSBTAG00000009265 ENSBTAG00000010717 ENSBTAG00000011234 ENSBTAG00000011483 ENSBTAG00000011628 …
Positive regulation of nitrogen compound metabolic process	3.35586e-13	144	ENSBTAG00000000570 ENSBTAG00000001294 ENSBTAG00000001562 ENSBTAG00000002216 ENSBTAG00000004037 ENSBTAG00000004879 ENSBTAG00000005412 ENSBTAG00000006487 ENSBTAG00000007084 ENSBTAG00000007599 ENSBTAG00000007689 ENSBTAG00000008330 ENSBTAG00000009265 ENSBTAG00000010717 ENSBTAG00000011234 ENSBTAG00000011677 ENSBTAG00000012046 ENSBTAG00000012946 ENSBTAG00000013860 ENSBTAG00000014003 ENSBTAG00000014881 …
Positive regulation of macromolecule biosynthetic process	8.73024e-13	101	ENSBTAG00000001562 ENSBTAG00000002216 ENSBTAG00000004037 ENSBTAG00000004879 ENSBTAG00000006487 ENSBTAG00000007599 ENSBTAG00000007689 ENSBTAG00000009265 ENSBTAG00000010717 ENSBTAG00000011234 ENSBTAG00000011677 ENSBTAG00000012046 ENSBTAG00000012946 ENSBTAG00000014003 ENSBTAG00000015316 ENSBTAG00000015371 ENSBTAG00000017994 ENSBTAG00000018352 ENSBTAG00000018948 ENSBTAG00000031106 ENSBTAG00000040116 …
Transcription by RNA polymerase II	1.00784e-12	110	ENSBTAG00000002216 ENSBTAG00000004037 ENSBTAG00000004189 ENSBTAG00000004879 ENSBTAG00000005312 ENSBTAG00000007599 ENSBTAG00000007689 ENSBTAG00000008313 ENSBTAG00000009265 ENSBTAG00000009879 ENSBTAG00000010069 ENSBTAG00000010717 ENSBTAG00000011234 ENSBTAG00000011734 ENSBTAG00000012046 ENSBTAG00000012102 ENSBTAG00000012946 ENSBTAG00000014003 ENSBTAG00000014389 ENSBTAG00000015316 ENSBTAG00000015371 …
Positive regulation of cellular biosynthetic process	1.19296e-12	103	ENSBTAG00000001562 ENSBTAG00000002216 ENSBTAG00000004037 ENSBTAG00000004879 ENSBTAG00000006487 ENSBTAG00000007599 ENSBTAG00000007689 ENSBTAG00000009265 ENSBTAG00000010717 ENSBTAG00000011234 ENSBTAG00000011677 ENSBTAG00000012046 ENSBTAG00000012946 ENSBTAG00000014003 ENSBTAG00000015316 ENSBTAG00000015371 ENSBTAG00000017994 ENSBTAG00000018352 ENSBTAG00000018948 ENSBTAG00000031106 ENSBTAG00000040116 …
Regulation of primary metabolic process	1.19296e-12	220	ENSBTAG00000000570 ENSBTAG00000001294 ENSBTAG00000001562 ENSBTAG00000002216 ENSBTAG00000002258 ENSBTAG00000003186 ENSBTAG00000004037 ENSBTAG00000004189 ENSBTAG00000004879 ENSBTAG00000005312 ENSBTAG00000005412 ENSBTAG00000006422 ENSBTAG00000006487 ENSBTAG00000006563 ENSBTAG00000007084 ENSBTAG00000007599 ENSBTAG00000007689 ENSBTAG00000008313 ENSBTAG00000008330 ENSBTAG00000008717 ENSBTAG00000008937 …
Positive regulation of nucleobase-containing compound metabolic process	1.24476e-12	102	ENSBTAG00000001562 ENSBTAG00000002216 ENSBTAG00000004037 ENSBTAG00000004879 ENSBTAG00000007599 ENSBTAG00000007689 ENSBTAG00000009265 ENSBTAG00000010717 ENSBTAG00000011234 ENSBTAG00000011677 ENSBTAG00000012046 ENSBTAG00000012946 ENSBTAG00000014003 ENSBTAG00000015316 ENSBTAG00000015371 ENSBTAG00000017994 ENSBTAG00000018352 ENSBTAG00000018948 ENSBTAG00000031106 ENSBTAG00000040116 ENSBTAG00000044105 …
Regulation of biosynthetic process	1.89893e-12	166	ENSBTAG00000001562 ENSBTAG00000002216 ENSBTAG00000002258 ENSBTAG00000003186 ENSBTAG00000004037 ENSBTAG00000004189 ENSBTAG00000004879 ENSBTAG00000005312 ENSBTAG00000006422 ENSBTAG00000006487 ENSBTAG00000007599 ENSBTAG00000007689 ENSBTAG00000008313 ENSBTAG00000009265 ENSBTAG00000009879 ENSBTAG00000009923 ENSBTAG00000009996 ENSBTAG00000010069 ENSBTAG00000010717 ENSBTAG00000011234 ENSBTAG00000011677 …
Regulation of gene expression	1.96201e-12	172	ENSBTAG00000001562 ENSBTAG00000002216 ENSBTAG00000003186 ENSBTAG00000004037 ENSBTAG00000004189 ENSBTAG00000004879 ENSBTAG00000005312 ENSBTAG00000005865 ENSBTAG00000006422 ENSBTAG00000006487 ENSBTAG00000007599 ENSBTAG00000007689 ENSBTAG00000008313 ENSBTAG00000008419 ENSBTAG00000008937 ENSBTAG00000009265 ENSBTAG00000009879 ENSBTAG00000009923 ENSBTAG00000009996 ENSBTAG00000010069 ENSBTAG00000010717 …
Positive regulation of gene expression	3.51794e-12	103	ENSBTAG00000001562 ENSBTAG00000002216 ENSBTAG00000004037 ENSBTAG00000004879 ENSBTAG00000005312 ENSBTAG00000006487 ENSBTAG00000007599 ENSBTAG00000007689 ENSBTAG00000008419 ENSBTAG00000009265 ENSBTAG00000010717 ENSBTAG00000011234 ENSBTAG00000011677 ENSBTAG00000012046 ENSBTAG00000012946 ENSBTAG00000014003 ENSBTAG00000015316 ENSBTAG00000015371 ENSBTAG00000017994 ENSBTAG00000018352 ENSBTAG00000018948 …
Regulation of cellular metabolic process	4.3126e-12	222	ENSBTAG00000000570 ENSBTAG00000001294 ENSBTAG00000001562 ENSBTAG00000002216 ENSBTAG00000002258 ENSBTAG00000003186 ENSBTAG00000004037 ENSBTAG00000004189 ENSBTAG00000004879 ENSBTAG00000005312 ENSBTAG00000006422 ENSBTAG00000006487 ENSBTAG00000006563 ENSBTAG00000007084 ENSBTAG00000007599 ENSBTAG00000007689 ENSBTAG00000008313 ENSBTAG00000008330 ENSBTAG00000008717 ENSBTAG00000008937 ENSBTAG00000009265 …
Nucleobase-containing compound biosynthetic process	8.23197e-12	165	ENSBTAG00000000286 ENSBTAG00000001562 ENSBTAG00000002216 ENSBTAG00000003186 ENSBTAG00000004037 ENSBTAG00000004189 ENSBTAG00000004879 ENSBTAG00000005312 ENSBTAG00000006422 ENSBTAG00000007447 ENSBTAG00000007599 ENSBTAG00000007689 ENSBTAG00000008313 ENSBTAG00000008419 ENSBTAG00000009265 ENSBTAG00000009879 ENSBTAG00000009923 ENSBTAG00000009996 ENSBTAG00000010069 ENSBTAG00000010717 ENSBTAG00000010760 …
Heterocycle biosynthetic process	9.13096e-12	167	ENSBTAG00000000286 ENSBTAG00000001562 ENSBTAG00000002216 ENSBTAG00000003186 ENSBTAG00000004037 ENSBTAG00000004189 ENSBTAG00000004879 ENSBTAG00000005312 ENSBTAG00000006422 ENSBTAG00000007447 ENSBTAG00000007599 ENSBTAG00000007689 ENSBTAG00000008313 ENSBTAG00000008419 ENSBTAG00000009265 ENSBTAG00000009879 ENSBTAG00000009923 ENSBTAG00000009996 ENSBTAG00000010069 ENSBTAG00000010717 ENSBTAG00000010760 …
Aromatic compound biosynthetic process	1.08485e-11	167	ENSBTAG00000000286 ENSBTAG00000001562 ENSBTAG00000002216 ENSBTAG00000003186 ENSBTAG00000004037 ENSBTAG00000004189 ENSBTAG00000004879 ENSBTAG00000005312 ENSBTAG00000006422 ENSBTAG00000007447 ENSBTAG00000007599 ENSBTAG00000007689 ENSBTAG00000008313 ENSBTAG00000008419 ENSBTAG00000009265 ENSBTAG00000009879 ENSBTAG00000009923 ENSBTAG00000009996 ENSBTAG00000010069 ENSBTAG00000010717 ENSBTAG00000010760 …
Cellular nitrogen compound biosynthetic process	1.34735e-11	191	ENSBTAG00000000286 ENSBTAG00000001562 ENSBTAG00000001988 ENSBTAG00000002216 ENSBTAG00000003186 ENSBTAG00000004037 ENSBTAG00000004189 ENSBTAG00000004258 ENSBTAG00000004861 ENSBTAG00000004879 ENSBTAG00000005304 ENSBTAG00000005312 ENSBTAG00000006422 ENSBTAG00000006487 ENSBTAG00000006765 ENSBTAG00000006963 ENSBTAG00000007447 ENSBTAG00000007474 ENSBTAG00000007599 ENSBTAG00000007689 ENSBTAG00000008313 …
Organic cyclic compound biosynthetic process	1.47687e-11	170	ENSBTAG00000000286 ENSBTAG00000001562 ENSBTAG00000002216 ENSBTAG00000002258 ENSBTAG00000003186 ENSBTAG00000004037 ENSBTAG00000004189 ENSBTAG00000004879 ENSBTAG00000005312 ENSBTAG00000006422 ENSBTAG00000007447 ENSBTAG00000007599 ENSBTAG00000007689 ENSBTAG00000008313 ENSBTAG00000008419 ENSBTAG00000009265 ENSBTAG00000009879 ENSBTAG00000009923 ENSBTAG00000009996 ENSBTAG00000010069 ENSBTAG00000010717 …
Regulation of cellular biosynthetic process	1.72531e-11	161	ENSBTAG00000001562 ENSBTAG00000002216 ENSBTAG00000003186 ENSBTAG00000004037 ENSBTAG00000004189 ENSBTAG00000004879 ENSBTAG00000005312 ENSBTAG00000006422 ENSBTAG00000006487 ENSBTAG00000007599 ENSBTAG00000007689 ENSBTAG00000008313 ENSBTAG00000009265 ENSBTAG00000009879 ENSBTAG00000009923 ENSBTAG00000009996 ENSBTAG00000010069 ENSBTAG00000010717 ENSBTAG00000011234 ENSBTAG00000011677 ENSBTAG00000011734 …
Positive regulation of transcription by RNA polymerase II	2.25142e-11	75	ENSBTAG00000002216 ENSBTAG00000004037 ENSBTAG00000004879 ENSBTAG00000007599 ENSBTAG00000007689 ENSBTAG00000009265 ENSBTAG00000010717 ENSBTAG00000011234 ENSBTAG00000012046 ENSBTAG00000012946 ENSBTAG00000014003 ENSBTAG00000015316 ENSBTAG00000015371 ENSBTAG00000017994 ENSBTAG00000018352 ENSBTAG00000018948 ENSBTAG00000031106 ENSBTAG00000044105 ENSBTAG00000047991 ENSBTAG00000001936 ENSBTAG00000003018 …
Regulation of nitrogen compound metabolic process	2.82928e-11	211	ENSBTAG00000000570 ENSBTAG00000001294 ENSBTAG00000001562 ENSBTAG00000002216 ENSBTAG00000003186 ENSBTAG00000004037 ENSBTAG00000004189 ENSBTAG00000004879 ENSBTAG00000005312 ENSBTAG00000005412 ENSBTAG00000006422 ENSBTAG00000006487 ENSBTAG00000006563 ENSBTAG00000007084 ENSBTAG00000007599 ENSBTAG00000007689 ENSBTAG00000008313 ENSBTAG00000008330 ENSBTAG00000008717 ENSBTAG00000008937 ENSBTAG00000009265 …
Regulation of macromolecule metabolic process	3.73116e-11	217	ENSBTAG00000000570 ENSBTAG00000001294 ENSBTAG00000001562 ENSBTAG00000002216 ENSBTAG00000003186 ENSBTAG00000004037 ENSBTAG00000004189 ENSBTAG00000004879 ENSBTAG00000005312 ENSBTAG00000005412 ENSBTAG00000005865 ENSBTAG00000006422 ENSBTAG00000006487 ENSBTAG00000006563 ENSBTAG00000007084 ENSBTAG00000007599 ENSBTAG00000007689 ENSBTAG00000008313 ENSBTAG00000008330 ENSBTAG00000008419 ENSBTAG00000008717 …
TR3 vs. CTR - Upregulatd genes
Functional Category	Enrichment FDR	Genes in list	Genes
Developmental process	6.11004e-11	243	ENSBTAG00000000570 ENSBTAG00000000601 ENSBTAG00000000919 ENSBTAG00000001936 ENSBTAG00000002216 ENSBTAG00000002527 ENSBTAG00000002661 ENSBTAG00000004602 ENSBTAG00000004822 ENSBTAG00000005313 ENSBTAG00000005672 ENSBTAG00000005748 ENSBTAG00000006030 ENSBTAG00000006563 ENSBTAG00000006977 ENSBTAG00000007379 ENSBTAG00000008057 ENSBTAG00000008333 ENSBTAG00000008501 ENSBTAG00000008714 ENSBTAG00000008800 …
Cellular developmental process	6.09393e-10	181	ENSBTAG00000000570 ENSBTAG00000000919 ENSBTAG00000001936 ENSBTAG00000002216 ENSBTAG00000002527 ENSBTAG00000002661 ENSBTAG00000004822 ENSBTAG00000005313 ENSBTAG00000005672 ENSBTAG00000005748 ENSBTAG00000006030 ENSBTAG00000006563 ENSBTAG00000006977 ENSBTAG00000007379 ENSBTAG00000008057 ENSBTAG00000008333 ENSBTAG00000008501 ENSBTAG00000008940 ENSBTAG00000009830 ENSBTAG00000010820 ENSBTAG00000011483 …
Tissue development	1.80532e-09	103	ENSBTAG00000000601 ENSBTAG00000001936 ENSBTAG00000002216 ENSBTAG00000004822 ENSBTAG00000006030 ENSBTAG00000006563 ENSBTAG00000009265 ENSBTAG00000011734 ENSBTAG00000011934 ENSBTAG00000012761 ENSBTAG00000014818 ENSBTAG00000018227 ENSBTAG00000020737 ENSBTAG00000021273 ENSBTAG00000039688 ENSBTAG00000044192 ENSBTAG00000046122 ENSBTAG00000000128 ENSBTAG00000000570 ENSBTAG00000000917 ENSBTAG00000000919 …
Anatomical structure development	1.80532e-09	224	ENSBTAG00000000570 ENSBTAG00000000601 ENSBTAG00000000919 ENSBTAG00000001936 ENSBTAG00000002216 ENSBTAG00000002527 ENSBTAG00000002661 ENSBTAG00000004602 ENSBTAG00000004822 ENSBTAG00000005313 ENSBTAG00000005672 ENSBTAG00000005748 ENSBTAG00000006030 ENSBTAG00000006563 ENSBTAG00000006977 ENSBTAG00000007379 ENSBTAG00000008057 ENSBTAG00000008501 ENSBTAG00000008714 ENSBTAG00000008800 ENSBTAG00000008940 …
Cell differentiation	2.36701e-09	170	ENSBTAG00000000570 ENSBTAG00000000919 ENSBTAG00000001936 ENSBTAG00000002216 ENSBTAG00000002527 ENSBTAG00000002661 ENSBTAG00000004822 ENSBTAG00000005313 ENSBTAG00000005748 ENSBTAG00000006030 ENSBTAG00000006563 ENSBTAG00000006977 ENSBTAG00000007379 ENSBTAG00000008057 ENSBTAG00000008333 ENSBTAG00000008501 ENSBTAG00000008940 ENSBTAG00000009830 ENSBTAG00000010820 ENSBTAG00000011483 ENSBTAG00000011662 …
System development	6.01424e-09	190	ENSBTAG00000000570 ENSBTAG00000000601 ENSBTAG00000000919 ENSBTAG00000001936 ENSBTAG00000002216 ENSBTAG00000002527 ENSBTAG00000002661 ENSBTAG00000004822 ENSBTAG00000005313 ENSBTAG00000005748 ENSBTAG00000006030 ENSBTAG00000006563 ENSBTAG00000006977 ENSBTAG00000007379 ENSBTAG00000008714 ENSBTAG00000008940 ENSBTAG00000009199 ENSBTAG00000010820 ENSBTAG00000011483 ENSBTAG00000011662 ENSBTAG00000011734 …
Regulation of multicellular organismal process	6.18713e-09	140	ENSBTAG00000000919 ENSBTAG00000001398 ENSBTAG00000002216 ENSBTAG00000002527 ENSBTAG00000002661 ENSBTAG00000006030 ENSBTAG00000007379 ENSBTAG00000008714 ENSBTAG00000011483 ENSBTAG00000012319 ENSBTAG00000013407 ENSBTAG00000014438 ENSBTAG00000015032 ENSBTAG00000016169 ENSBTAG00000019707 ENSBTAG00000019770 ENSBTAG00000020696 ENSBTAG00000021273 ENSBTAG00000030425 ENSBTAG00000039688 ENSBTAG00000002023 …
Positive regulation of biological process	1.2769e-08	242	ENSBTAG00000000328 ENSBTAG00000000570 ENSBTAG00000000854 ENSBTAG00000000919 ENSBTAG00000001600 ENSBTAG00000001609 ENSBTAG00000001836 ENSBTAG00000002023 ENSBTAG00000002216 ENSBTAG00000002661 ENSBTAG00000004286 ENSBTAG00000004822 ENSBTAG00000005312 ENSBTAG00000005504 ENSBTAG00000005748 ENSBTAG00000006030 ENSBTAG00000007506 ENSBTAG00000007599 ENSBTAG00000008714 ENSBTAG00000009199 ENSBTAG00000009265 …
Multicellular organism development	3.77838e-08	199	ENSBTAG00000000570 ENSBTAG00000000601 ENSBTAG00000000919 ENSBTAG00000001936 ENSBTAG00000002216 ENSBTAG00000002527 ENSBTAG00000002661 ENSBTAG00000004822 ENSBTAG00000005313 ENSBTAG00000005748 ENSBTAG00000006030 ENSBTAG00000006563 ENSBTAG00000006977 ENSBTAG00000007379 ENSBTAG00000008714 ENSBTAG00000008940 ENSBTAG00000009199 ENSBTAG00000010820 ENSBTAG00000011483 ENSBTAG00000011662 ENSBTAG00000011734 …
Anatomical structure morphogenesis	1.54097e-07	125	ENSBTAG00000002216 ENSBTAG00000002527 ENSBTAG00000002661 ENSBTAG00000004602 ENSBTAG00000004822 ENSBTAG00000005313 ENSBTAG00000005672 ENSBTAG00000005748 ENSBTAG00000006030 ENSBTAG00000008057 ENSBTAG00000008501 ENSBTAG00000008940 ENSBTAG00000011662 ENSBTAG00000012604 ENSBTAG00000012761 ENSBTAG00000012987 ENSBTAG00000013407 ENSBTAG00000014438 ENSBTAG00000014676 ENSBTAG00000014818 ENSBTAG00000015058 …
Regulation of developmental process	2.07847e-07	119	ENSBTAG00000000919 ENSBTAG00000002216 ENSBTAG00000002527 ENSBTAG00000002661 ENSBTAG00000006030 ENSBTAG00000007379 ENSBTAG00000008714 ENSBTAG00000009830 ENSBTAG00000011483 ENSBTAG00000012046 ENSBTAG00000013407 ENSBTAG00000013932 ENSBTAG00000014438 ENSBTAG00000016169 ENSBTAG00000017439 ENSBTAG00000018691 ENSBTAG00000019707 ENSBTAG00000020696 ENSBTAG00000021273 ENSBTAG00000030425 ENSBTAG00000032089 …
Negative regulation of cellular process	4.77201e-07	190	ENSBTAG00000004286 ENSBTAG00000004956 ENSBTAG00000005275 ENSBTAG00000005748 ENSBTAG00000006233 ENSBTAG00000006563 ENSBTAG00000008250 ENSBTAG00000009199 ENSBTAG00000010927 ENSBTAG00000011437 ENSBTAG00000011662 ENSBTAG00000011937 ENSBTAG00000011975 ENSBTAG00000012046 ENSBTAG00000012319 ENSBTAG00000012969 ENSBTAG00000013407 ENSBTAG00000014881 ENSBTAG00000015450 ENSBTAG00000015711 ENSBTAG00000015976 …
Muscle structure development	5.16772e-07	44	ENSBTAG00000002216 ENSBTAG00000006030 ENSBTAG00000006563 ENSBTAG00000011734 ENSBTAG00000014818 ENSBTAG00000006686 ENSBTAG00000021706 ENSBTAG00000000919 ENSBTAG00000001835 ENSBTAG00000002283 ENSBTAG00000002574 ENSBTAG00000004602 ENSBTAG00000005474 ENSBTAG00000005748 ENSBTAG00000005812 ENSBTAG00000006694 ENSBTAG00000006800 ENSBTAG00000008022 ENSBTAG00000008545 ENSBTAG00000009749 ENSBTAG00000010549 …
Negative regulation of biological process	7.35956e-07	205	ENSBTAG00000004286 ENSBTAG00000004956 ENSBTAG00000005275 ENSBTAG00000005748 ENSBTAG00000006233 ENSBTAG00000006563 ENSBTAG00000008250 ENSBTAG00000009199 ENSBTAG00000010927 ENSBTAG00000011437 ENSBTAG00000011662 ENSBTAG00000011815 ENSBTAG00000011937 ENSBTAG00000011975 ENSBTAG00000012046 ENSBTAG00000012319 ENSBTAG00000012969 ENSBTAG00000013407 ENSBTAG00000014881 ENSBTAG00000015450 ENSBTAG00000015711 …
Striated muscle tissue development	1.19985e-06	33	ENSBTAG00000002216 ENSBTAG00000006030 ENSBTAG00000006563 ENSBTAG00000011734 ENSBTAG00000014818 ENSBTAG00000000919 ENSBTAG00000001835 ENSBTAG00000002283 ENSBTAG00000002574 ENSBTAG00000004602 ENSBTAG00000005474 ENSBTAG00000005748 ENSBTAG00000005812 ENSBTAG00000008545 ENSBTAG00000010549 ENSBTAG00000011437 ENSBTAG00000015711 ENSBTAG00000016063 ENSBTAG00000020737 ENSBTAG00000021396 ENSBTAG00000022799 …
Cellular response to chemical stimulus	1.19985e-06	126	ENSBTAG00000000507 ENSBTAG00000001801 ENSBTAG00000001864 ENSBTAG00000001936 ENSBTAG00000004401 ENSBTAG00000007599 ENSBTAG00000008250 ENSBTAG00000009190 ENSBTAG00000009265 ENSBTAG00000010913 ENSBTAG00000011934 ENSBTAG00000012046 ENSBTAG00000013555 ENSBTAG00000015032 ENSBTAG00000016711 ENSBTAG00000019293 ENSBTAG00000023963 ENSBTAG00000024115 ENSBTAG00000031500 ENSBTAG00000035018 ENSBTAG00000037778 …
Cellular response to organic substance	2.17935e-06	105	ENSBTAG00000000507 ENSBTAG00000001864 ENSBTAG00000001936 ENSBTAG00000004401 ENSBTAG00000007599 ENSBTAG00000008250 ENSBTAG00000009190 ENSBTAG00000009265 ENSBTAG00000011934 ENSBTAG00000012046 ENSBTAG00000013555 ENSBTAG00000015032 ENSBTAG00000019293 ENSBTAG00000023963 ENSBTAG00000024115 ENSBTAG00000031500 ENSBTAG00000035018 ENSBTAG00000037778 ENSBTAG00000037811 ENSBTAG00000038735 ENSBTAG00000006686 …
Animal organ development	2.8993e-06	138	ENSBTAG00000000601 ENSBTAG00000000919 ENSBTAG00000001936 ENSBTAG00000002216 ENSBTAG00000004822 ENSBTAG00000006030 ENSBTAG00000006563 ENSBTAG00000011734 ENSBTAG00000011934 ENSBTAG00000014818 ENSBTAG00000018227 ENSBTAG00000019675 ENSBTAG00000021273 ENSBTAG00000021396 ENSBTAG00000031388 ENSBTAG00000039688 ENSBTAG00000044192 ENSBTAG00000009101 ENSBTAG00000010927 ENSBTAG00000019293 ENSBTAG00000021240 …
Muscle tissue development	2.8993e-06	33	ENSBTAG00000002216 ENSBTAG00000006030 ENSBTAG00000006563 ENSBTAG00000011734 ENSBTAG00000014818 ENSBTAG00000000919 ENSBTAG00000001835 ENSBTAG00000002283 ENSBTAG00000002574 ENSBTAG00000004602 ENSBTAG00000005474 ENSBTAG00000005748 ENSBTAG00000005812 ENSBTAG00000008545 ENSBTAG00000010549 ENSBTAG00000011437 ENSBTAG00000015711 ENSBTAG00000016063 ENSBTAG00000020737 ENSBTAG00000021396 ENSBTAG00000022799 …
Cell development	4.47844e-06	100	ENSBTAG00000000919 ENSBTAG00000002216 ENSBTAG00000002527 ENSBTAG00000002661 ENSBTAG00000004822 ENSBTAG00000005313 ENSBTAG00000006030 ENSBTAG00000006563 ENSBTAG00000006977 ENSBTAG00000007379 ENSBTAG00000008057 ENSBTAG00000008940 ENSBTAG00000011483 ENSBTAG00000012604 ENSBTAG00000012987 ENSBTAG00000013407 ENSBTAG00000014438 ENSBTAG00000014818 ENSBTAG00000016169 ENSBTAG00000018227 ENSBTAG00000020696 …
Regulation of multicellular organismal development	4.82036e-06	93	ENSBTAG00000000919 ENSBTAG00000002216 ENSBTAG00000002527 ENSBTAG00000002661 ENSBTAG00000006030 ENSBTAG00000007379 ENSBTAG00000008714 ENSBTAG00000011483 ENSBTAG00000013407 ENSBTAG00000014438 ENSBTAG00000016169 ENSBTAG00000019707 ENSBTAG00000020696 ENSBTAG00000021273 ENSBTAG00000030425 ENSBTAG00000039688 ENSBTAG00000002023 ENSBTAG00000003675 ENSBTAG00000019293 ENSBTAG00000021240 ENSBTAG00000025210 …
Heart process	7.06665e-06	22	ENSBTAG00000001398 ENSBTAG00000012319 ENSBTAG00000021741 ENSBTAG00000000919 ENSBTAG00000001609 ENSBTAG00000001835 ENSBTAG00000002688 ENSBTAG00000004751 ENSBTAG00000006139 ENSBTAG00000008294 ENSBTAG00000010551 ENSBTAG00000013861 ENSBTAG00000018520 ENSBTAG00000022114 ENSBTAG00000039340 ENSBTAG00000040053 ENSBTAG00000054195 ENSBTAG00000002023 ENSBTAG00000007884 ENSBTAG00000008394 ENSBTAG00000009075 …
Regulation of anatomical structure morphogenesis	7.19986e-06	57	ENSBTAG00000002216 ENSBTAG00000002527 ENSBTAG00000002661 ENSBTAG00000006030 ENSBTAG00000013407 ENSBTAG00000014438 ENSBTAG00000017439 ENSBTAG00000018691 ENSBTAG00000019707 ENSBTAG00000020696 ENSBTAG00000021273 ENSBTAG00000032089 ENSBTAG00000021240 ENSBTAG00000025210 ENSBTAG00000000128 ENSBTAG00000000570 ENSBTAG00000000919 ENSBTAG00000001801 ENSBTAG00000002283 ENSBTAG00000002816 ENSBTAG00000004475 …
Heart development	7.26471e-06	39	ENSBTAG00000000919 ENSBTAG00000014818 ENSBTAG00000021396 ENSBTAG00000031388 ENSBTAG00000021741 ENSBTAG00000001835 ENSBTAG00000002261 ENSBTAG00000002283 ENSBTAG00000005474 ENSBTAG00000005748 ENSBTAG00000005787 ENSBTAG00000005812 ENSBTAG00000008197 ENSBTAG00000008353 ENSBTAG00000010820 ENSBTAG00000011437 ENSBTAG00000011662 ENSBTAG00000011734 ENSBTAG00000011815 ENSBTAG00000012555 ENSBTAG00000012761 …
Muscle organ development	1.03038e-05	29	ENSBTAG00000002216 ENSBTAG00000006030 ENSBTAG00000006563 ENSBTAG00000011734 ENSBTAG00000000919 ENSBTAG00000001835 ENSBTAG00000002283 ENSBTAG00000002574 ENSBTAG00000004602 ENSBTAG00000005474 ENSBTAG00000005748 ENSBTAG00000005812 ENSBTAG00000008545 ENSBTAG00000009749 ENSBTAG00000015711 ENSBTAG00000016063 ENSBTAG00000017486 ENSBTAG00000020737 ENSBTAG00000021396 ENSBTAG00000022799 ENSBTAG00000024449 …
Heart contraction	1.03038e-05	21	ENSBTAG00000001398 ENSBTAG00000012319 ENSBTAG00000021741 ENSBTAG00000000919 ENSBTAG00000001609 ENSBTAG00000001835 ENSBTAG00000002688 ENSBTAG00000004751 ENSBTAG00000006139 ENSBTAG00000008294 ENSBTAG00000010551 ENSBTAG00000013861 ENSBTAG00000018520 ENSBTAG00000022114 ENSBTAG00000039340 ENSBTAG00000040053 ENSBTAG00000054195 ENSBTAG00000002023 ENSBTAG00000007884 ENSBTAG00000008394 ENSBTAG00000009075
Tube development	1.21915e-05	59	ENSBTAG00000005748 ENSBTAG00000011662 ENSBTAG00000019675 ENSBTAG00000019707 ENSBTAG00000046122 ENSBTAG00000019293 ENSBTAG00000025210 ENSBTAG00000000128 ENSBTAG00000000570 ENSBTAG00000000919 ENSBTAG00000001835 ENSBTAG00000001864 ENSBTAG00000001945 ENSBTAG00000002261 ENSBTAG00000004822 ENSBTAG00000005313 ENSBTAG00000005474 ENSBTAG00000005787 ENSBTAG00000006474 ENSBTAG00000009845 ENSBTAG00000010820 …
Epithelium development	1.3961e-05	61	ENSBTAG00000001936 ENSBTAG00000004822 ENSBTAG00000011934 ENSBTAG00000012761 ENSBTAG00000018227 ENSBTAG00000020737 ENSBTAG00000044192 ENSBTAG00000046122 ENSBTAG00000000570 ENSBTAG00000000919 ENSBTAG00000001835 ENSBTAG00000001945 ENSBTAG00000002261 ENSBTAG00000002283 ENSBTAG00000005474 ENSBTAG00000005748 ENSBTAG00000005787 ENSBTAG00000006335 ENSBTAG00000006474 ENSBTAG00000009845 ENSBTAG00000010820 …
Positive regulation of cellular process	1.44996e-05	203	ENSBTAG00000000328 ENSBTAG00000000570 ENSBTAG00000000919 ENSBTAG00000001600 ENSBTAG00000001609 ENSBTAG00000002023 ENSBTAG00000002216 ENSBTAG00000002661 ENSBTAG00000004286 ENSBTAG00000004822 ENSBTAG00000005504 ENSBTAG00000005748 ENSBTAG00000006030 ENSBTAG00000007506 ENSBTAG00000007599 ENSBTAG00000008714 ENSBTAG00000009199 ENSBTAG00000009265 ENSBTAG00000010502 ENSBTAG00000011483 ENSBTAG00000011662 …
Nervous system development	1.92225e-05	97	ENSBTAG00000000570 ENSBTAG00000000919 ENSBTAG00000002527 ENSBTAG00000002661 ENSBTAG00000004822 ENSBTAG00000005313 ENSBTAG00000006977 ENSBTAG00000007379 ENSBTAG00000008714 ENSBTAG00000008940 ENSBTAG00000009199 ENSBTAG00000010820 ENSBTAG00000011483 ENSBTAG00000012604 ENSBTAG00000012987 ENSBTAG00000013407 ENSBTAG00000014438 ENSBTAG00000015991 ENSBTAG00000016169 ENSBTAG00000018227 ENSBTAG00000019675 …
