# Supplementary material for: Supranutritional Maternal Organic Selenium Supplementation during Different Trimesters of Pregnancy Affects the Muscle Gene Transcriptome of Newborn Beef Calves in a Time-Dependent Manner
Source: Genes (Basel). 2021 Nov 25;12(12):1884. doi: 10.3390/genes12121884 (PMC8701265; doi:10.3390/genes12121884)
Supplement: Supplementary file 1 [file genes-12-01884-s001.zip › Supplementary Table S7_.xlsx]

## Sheet: Description
Supranutritional Maternal Organic Selenium Supplementation During Different Trimesters of Pregnancy Affects the Muscle Gene Transcriptome of Newborn Beef Calves in a Time-dependent Manner
Wellison J. S. Diniz 1,*; Gerd Bobe 2,3; Joseph J. Klopfenstein 4; Yunus Gultekin 2; T. Zane Davis 5; Alison K. Ward 6; Jean A. Hall 7,*
1 Department of Animal Sciences, Auburn University; Auburn, AL 3849, USA; wzd0027@auburn.edu 2 Department of Animal and Rangeland Sciences, College of Agricultural Sciences, Oregon State University, Corvallis, OR, USA; yunus.gultekin@oregonstate.edu; gerd.bobe@oregonstate.edu 3 Linus Pauling Institute, Oregon State University, Corvallis, OR 97331, USA; 4 Department of Clinical Sciences, Carlson C…
Data Description
Tab 1.	Over-represented biological processes of downregulated genes for each of the group contrasts from muscle tissue.

## Sheet: Tab. 1
Over-represented biological processes of downregulated genes for each of the group contrasts from muscle tissue.
TR1 vs. CTR
TR2 vs. CTR
TR3 vs. CTR
TR1 vs. CTR - Downregulatd genes
Functional Category	Enrichment FDR	Genes in list	Genes
Muscle structure development	6.51097e-13	53	ENSBTAG00000002630 ENSBTAG00000005604 ENSBTAG00000006030 ENSBTAG00000009387 ENSBTAG00000013607 ENSBTAG00000014003 ENSBTAG00000020080 ENSBTAG00000022158 ENSBTAG00000040338 ENSBTAG00000008868 ENSBTAG00000019177 ENSBTAG00000020035 ENSBTAG00000000092 ENSBTAG00000000231 ENSBTAG00000001058 ENSBTAG00000001725 ENSBTAG00000004322 ENSBTAG00000005970 ENSBTAG00000006466 ENSBTAG00000006618 ENSBTAG00000010069 …
Muscle cell development	1.2697e-12	28	ENSBTAG00000006030 ENSBTAG00000009387 ENSBTAG00000013607 ENSBTAG00000014003 ENSBTAG00000020080 ENSBTAG00000022158 ENSBTAG00000040338 ENSBTAG00000019177 ENSBTAG00000020035 ENSBTAG00000008868 ENSBTAG00000011500 ENSBTAG00000012777 ENSBTAG00000015470 ENSBTAG00000016063 ENSBTAG00000017509 ENSBTAG00000018358 ENSBTAG00000018707 ENSBTAG00000020223 ENSBTAG00000020701 ENSBTAG00000022244 ENSBTAG00000022699 …
Muscle system process	1.70581e-12	38	ENSBTAG00000003826 ENSBTAG00000005373 ENSBTAG00000009387 ENSBTAG00000010880 ENSBTAG00000011500 ENSBTAG00000012319 ENSBTAG00000013347 ENSBTAG00000020080 ENSBTAG00000020223 ENSBTAG00000022158 ENSBTAG00000040338 ENSBTAG00000001465 ENSBTAG00000005586 ENSBTAG00000006030 ENSBTAG00000006902 ENSBTAG00000007090 ENSBTAG00000009707 ENSBTAG00000011803 ENSBTAG00000012777 ENSBTAG00000013411 ENSBTAG00000014547 …
Muscle contraction	9.7745e-12	33	ENSBTAG00000003826 ENSBTAG00000005373 ENSBTAG00000009387 ENSBTAG00000010880 ENSBTAG00000011500 ENSBTAG00000012319 ENSBTAG00000013347 ENSBTAG00000020080 ENSBTAG00000020223 ENSBTAG00000022158 ENSBTAG00000040338 ENSBTAG00000006902 ENSBTAG00000007090 ENSBTAG00000009707 ENSBTAG00000011803 ENSBTAG00000012777 ENSBTAG00000013411 ENSBTAG00000014547 ENSBTAG00000014583 ENSBTAG00000018310 ENSBTAG00000018358 …
Muscle cell differentiation	1.52133e-11	37	ENSBTAG00000002630 ENSBTAG00000005604 ENSBTAG00000006030 ENSBTAG00000009387 ENSBTAG00000013607 ENSBTAG00000014003 ENSBTAG00000020080 ENSBTAG00000022158 ENSBTAG00000040338 ENSBTAG00000019177 ENSBTAG00000020035 ENSBTAG00000001725 ENSBTAG00000006466 ENSBTAG00000008868 ENSBTAG00000011500 ENSBTAG00000012777 ENSBTAG00000013347 ENSBTAG00000015470 ENSBTAG00000016063 ENSBTAG00000017155 ENSBTAG00000017509 …
Striated muscle cell development	3.57432e-11	25	ENSBTAG00000006030 ENSBTAG00000009387 ENSBTAG00000013607 ENSBTAG00000014003 ENSBTAG00000020080 ENSBTAG00000022158 ENSBTAG00000040338 ENSBTAG00000020035 ENSBTAG00000008868 ENSBTAG00000011500 ENSBTAG00000012777 ENSBTAG00000016063 ENSBTAG00000017509 ENSBTAG00000018358 ENSBTAG00000018707 ENSBTAG00000020223 ENSBTAG00000020701 ENSBTAG00000022244 ENSBTAG00000022699 ENSBTAG00000025853 ENSBTAG00000040053 …
Striated muscle contraction	5.3126e-11	24	ENSBTAG00000003826 ENSBTAG00000005373 ENSBTAG00000010880 ENSBTAG00000011500 ENSBTAG00000012319 ENSBTAG00000013347 ENSBTAG00000020223 ENSBTAG00000022158 ENSBTAG00000006902 ENSBTAG00000011803 ENSBTAG00000014547 ENSBTAG00000014583 ENSBTAG00000018358 ENSBTAG00000020569 ENSBTAG00000022244 ENSBTAG00000022699 ENSBTAG00000024888 ENSBTAG00000025853 ENSBTAG00000040053 ENSBTAG00000040584 ENSBTAG00000054592 …
Striated muscle cell differentiation	5.85524e-11	32	ENSBTAG00000005604 ENSBTAG00000006030 ENSBTAG00000009387 ENSBTAG00000013607 ENSBTAG00000014003 ENSBTAG00000020080 ENSBTAG00000022158 ENSBTAG00000040338 ENSBTAG00000020035 ENSBTAG00000001725 ENSBTAG00000006466 ENSBTAG00000008868 ENSBTAG00000011500 ENSBTAG00000012777 ENSBTAG00000013347 ENSBTAG00000016063 ENSBTAG00000017155 ENSBTAG00000017509 ENSBTAG00000018358 ENSBTAG00000018707 ENSBTAG00000020223 …
Sarcomere organization	2.01034e-10	15	ENSBTAG00000009387 ENSBTAG00000013607 ENSBTAG00000020080 ENSBTAG00000022158 ENSBTAG00000040338 ENSBTAG00000008868 ENSBTAG00000011500 ENSBTAG00000012777 ENSBTAG00000017509 ENSBTAG00000018707 ENSBTAG00000020223 ENSBTAG00000020701 ENSBTAG00000022699 ENSBTAG00000040053 ENSBTAG00000021581
Small molecule biosynthetic process	3.24739e-10	51	ENSBTAG00000000160 ENSBTAG00000000894 ENSBTAG00000001485 ENSBTAG00000001601 ENSBTAG00000001626 ENSBTAG00000001992 ENSBTAG00000003222 ENSBTAG00000004112 ENSBTAG00000005586 ENSBTAG00000005744 ENSBTAG00000006396 ENSBTAG00000009846 ENSBTAG00000009951 ENSBTAG00000011934 ENSBTAG00000012259 ENSBTAG00000012632 ENSBTAG00000013081 ENSBTAG00000013960 ENSBTAG00000014476 ENSBTAG00000017690 ENSBTAG00000018966 …
Myofibril assembly	5.14501e-10	17	ENSBTAG00000009387 ENSBTAG00000013607 ENSBTAG00000020080 ENSBTAG00000022158 ENSBTAG00000040338 ENSBTAG00000008868 ENSBTAG00000011500 ENSBTAG00000012777 ENSBTAG00000017509 ENSBTAG00000018707 ENSBTAG00000020223 ENSBTAG00000020701 ENSBTAG00000022699 ENSBTAG00000040053 ENSBTAG00000046332 ENSBTAG00000021581 ENSBTAG00000005714
Small molecule metabolic process	5.14501e-10	98	ENSBTAG00000000160 ENSBTAG00000000291 ENSBTAG00000000795 ENSBTAG00000000894 ENSBTAG00000001116 ENSBTAG00000001485 ENSBTAG00000001601 ENSBTAG00000001626 ENSBTAG00000001992 ENSBTAG00000003222 ENSBTAG00000004112 ENSBTAG00000004256 ENSBTAG00000004679 ENSBTAG00000004881 ENSBTAG00000005498 ENSBTAG00000005586 ENSBTAG00000005744 ENSBTAG00000006396 ENSBTAG00000006928 ENSBTAG00000007943 ENSBTAG00000008204 …
Cofactor biosynthetic process	7.72185e-09	28	ENSBTAG00000000795 ENSBTAG00000000894 ENSBTAG00000001601 ENSBTAG00000005364 ENSBTAG00000005744 ENSBTAG00000006396 ENSBTAG00000009846 ENSBTAG00000012259 ENSBTAG00000019782 ENSBTAG00000020602 ENSBTAG00000001021 ENSBTAG00000004118 ENSBTAG00000005534 ENSBTAG00000006484 ENSBTAG00000006529 ENSBTAG00000008406 ENSBTAG00000008895 ENSBTAG00000011866 ENSBTAG00000013178 ENSBTAG00000013411 ENSBTAG00000013492 …
Coenzyme biosynthetic process	3.48821e-08	24	ENSBTAG00000000795 ENSBTAG00000000894 ENSBTAG00000001601 ENSBTAG00000005744 ENSBTAG00000006396 ENSBTAG00000009846 ENSBTAG00000012259 ENSBTAG00000019782 ENSBTAG00000020602 ENSBTAG00000005534 ENSBTAG00000006484 ENSBTAG00000006529 ENSBTAG00000008406 ENSBTAG00000008895 ENSBTAG00000011866 ENSBTAG00000013411 ENSBTAG00000013492 ENSBTAG00000014547 ENSBTAG00000016296 ENSBTAG00000016650 ENSBTAG00000019852 …
Muscle tissue development	4.46582e-08	34	ENSBTAG00000001865 ENSBTAG00000005604 ENSBTAG00000006030 ENSBTAG00000009387 ENSBTAG00000014003 ENSBTAG00000020080 ENSBTAG00000040338 ENSBTAG00000020035 ENSBTAG00000000231 ENSBTAG00000001058 ENSBTAG00000004322 ENSBTAG00000006618 ENSBTAG00000010069 ENSBTAG00000011390 ENSBTAG00000011808 ENSBTAG00000012777 ENSBTAG00000016063 ENSBTAG00000017743 ENSBTAG00000018358 ENSBTAG00000020701 ENSBTAG00000021120 …
Striated muscle tissue development	5.54687e-08	33	ENSBTAG00000001865 ENSBTAG00000005604 ENSBTAG00000006030 ENSBTAG00000009387 ENSBTAG00000014003 ENSBTAG00000020080 ENSBTAG00000040338 ENSBTAG00000020035 ENSBTAG00000000231 ENSBTAG00000001058 ENSBTAG00000004322 ENSBTAG00000006618 ENSBTAG00000010069 ENSBTAG00000011390 ENSBTAG00000011808 ENSBTAG00000012777 ENSBTAG00000016063 ENSBTAG00000017743 ENSBTAG00000018358 ENSBTAG00000020701 ENSBTAG00000021120 …
Muscle organ development	6.20671e-08	31	ENSBTAG00000005604 ENSBTAG00000006030 ENSBTAG00000009387 ENSBTAG00000014003 ENSBTAG00000020080 ENSBTAG00000040338 ENSBTAG00000020035 ENSBTAG00000000231 ENSBTAG00000001058 ENSBTAG00000004322 ENSBTAG00000005970 ENSBTAG00000006618 ENSBTAG00000010069 ENSBTAG00000011390 ENSBTAG00000011808 ENSBTAG00000016063 ENSBTAG00000017743 ENSBTAG00000018358 ENSBTAG00000020701 ENSBTAG00000021120 ENSBTAG00000022244 …
Oxoacid metabolic process	1.82192e-07	57	ENSBTAG00000000160 ENSBTAG00000000291 ENSBTAG00000000795 ENSBTAG00000000894 ENSBTAG00000001116 ENSBTAG00000001601 ENSBTAG00000003222 ENSBTAG00000004112 ENSBTAG00000004256 ENSBTAG00000004679 ENSBTAG00000004881 ENSBTAG00000005586 ENSBTAG00000006396 ENSBTAG00000006928 ENSBTAG00000007943 ENSBTAG00000008204 ENSBTAG00000009846 ENSBTAG00000011045 ENSBTAG00000011934 ENSBTAG00000012632 ENSBTAG00000012962 …
Skeletal muscle tissue development	2.08409e-07	21	ENSBTAG00000005604 ENSBTAG00000006030 ENSBTAG00000014003 ENSBTAG00000020035 ENSBTAG00000001058 ENSBTAG00000004322 ENSBTAG00000006618 ENSBTAG00000010069 ENSBTAG00000011390 ENSBTAG00000011808 ENSBTAG00000016063 ENSBTAG00000018358 ENSBTAG00000020701 ENSBTAG00000021120 ENSBTAG00000022244 ENSBTAG00000025853 ENSBTAG00000046332 ENSBTAG00000015996 ENSBTAG00000000329 ENSBTAG00000008376 ENSBTAG00000021218
Cellular component assembly involved in morphogenesis	2.17886e-07	17	ENSBTAG00000009387 ENSBTAG00000013607 ENSBTAG00000020080 ENSBTAG00000022158 ENSBTAG00000040338 ENSBTAG00000008868 ENSBTAG00000011500 ENSBTAG00000012777 ENSBTAG00000017509 ENSBTAG00000018707 ENSBTAG00000020223 ENSBTAG00000020701 ENSBTAG00000022699 ENSBTAG00000040053 ENSBTAG00000046332 ENSBTAG00000021581 ENSBTAG00000005714
Carboxylic acid metabolic process	2.20949e-07	55	ENSBTAG00000000160 ENSBTAG00000000291 ENSBTAG00000000795 ENSBTAG00000000894 ENSBTAG00000001116 ENSBTAG00000001601 ENSBTAG00000003222 ENSBTAG00000004112 ENSBTAG00000004256 ENSBTAG00000004679 ENSBTAG00000004881 ENSBTAG00000005586 ENSBTAG00000006396 ENSBTAG00000006928 ENSBTAG00000007943 ENSBTAG00000008204 ENSBTAG00000009846 ENSBTAG00000011045 ENSBTAG00000011934 ENSBTAG00000012632 ENSBTAG00000012962 …
Cofactor metabolic process	2.8959e-07	37	ENSBTAG00000000795 ENSBTAG00000000894 ENSBTAG00000001601 ENSBTAG00000004112 ENSBTAG00000004881 ENSBTAG00000005364 ENSBTAG00000005744 ENSBTAG00000006396 ENSBTAG00000009846 ENSBTAG00000011045 ENSBTAG00000011839 ENSBTAG00000012259 ENSBTAG00000014918 ENSBTAG00000019782 ENSBTAG00000020602 ENSBTAG00000051412 ENSBTAG00000001021 ENSBTAG00000002980 ENSBTAG00000004118 ENSBTAG00000005534 ENSBTAG00000006084 …
Pyridine-containing compound biosynthetic process	2.8959e-07	16	ENSBTAG00000000795 ENSBTAG00000000894 ENSBTAG00000001601 ENSBTAG00000006396 ENSBTAG00000012259 ENSBTAG00000019782 ENSBTAG00000020602 ENSBTAG00000005534 ENSBTAG00000008406 ENSBTAG00000008895 ENSBTAG00000013411 ENSBTAG00000013492 ENSBTAG00000014547 ENSBTAG00000016296 ENSBTAG00000016650 ENSBTAG00000022244
Organic acid metabolic process	3.43338e-07	57	ENSBTAG00000000160 ENSBTAG00000000291 ENSBTAG00000000795 ENSBTAG00000000894 ENSBTAG00000001116 ENSBTAG00000001601 ENSBTAG00000003222 ENSBTAG00000004112 ENSBTAG00000004256 ENSBTAG00000004679 ENSBTAG00000004881 ENSBTAG00000005586 ENSBTAG00000006396 ENSBTAG00000006928 ENSBTAG00000007943 ENSBTAG00000008204 ENSBTAG00000009846 ENSBTAG00000011045 ENSBTAG00000011934 ENSBTAG00000012632 ENSBTAG00000012962 …
Cardiac muscle contraction	3.43338e-07	17	ENSBTAG00000003826 ENSBTAG00000005373 ENSBTAG00000010880 ENSBTAG00000012319 ENSBTAG00000022158 ENSBTAG00000006902 ENSBTAG00000011500 ENSBTAG00000014583 ENSBTAG00000020569 ENSBTAG00000022699 ENSBTAG00000024888 ENSBTAG00000040053 ENSBTAG00000040584 ENSBTAG00000054592 ENSBTAG00000001575 ENSBTAG00000008394 ENSBTAG00000019177
Skeletal muscle organ development	3.43338e-07	21	ENSBTAG00000005604 ENSBTAG00000006030 ENSBTAG00000014003 ENSBTAG00000020035 ENSBTAG00000001058 ENSBTAG00000004322 ENSBTAG00000006618 ENSBTAG00000010069 ENSBTAG00000011390 ENSBTAG00000011808 ENSBTAG00000016063 ENSBTAG00000018358 ENSBTAG00000020701 ENSBTAG00000021120 ENSBTAG00000022244 ENSBTAG00000025853 ENSBTAG00000046332 ENSBTAG00000015996 ENSBTAG00000000329 ENSBTAG00000008376 ENSBTAG00000021218
Pyruvate metabolic process	4.21337e-07	16	ENSBTAG00000000894 ENSBTAG00000001601 ENSBTAG00000006396 ENSBTAG00000011934 ENSBTAG00000019700 ENSBTAG00000019782 ENSBTAG00000005534 ENSBTAG00000008406 ENSBTAG00000008895 ENSBTAG00000013411 ENSBTAG00000013492 ENSBTAG00000014547 ENSBTAG00000016296 ENSBTAG00000016650 ENSBTAG00000019852 ENSBTAG00000022244
Oxidoreduction coenzyme metabolic process	4.87226e-07	19	ENSBTAG00000000795 ENSBTAG00000000894 ENSBTAG00000001601 ENSBTAG00000005744 ENSBTAG00000006396 ENSBTAG00000019782 ENSBTAG00000020602 ENSBTAG00000005534 ENSBTAG00000006529 ENSBTAG00000008406 ENSBTAG00000008895 ENSBTAG00000013411 ENSBTAG00000013492 ENSBTAG00000014547 ENSBTAG00000016296 ENSBTAG00000016650 ENSBTAG00000019852 ENSBTAG00000021859 ENSBTAG00000022244
Coenzyme metabolic process	5.41383e-07	28	ENSBTAG00000000795 ENSBTAG00000000894 ENSBTAG00000001601 ENSBTAG00000004112 ENSBTAG00000004881 ENSBTAG00000005744 ENSBTAG00000006396 ENSBTAG00000009846 ENSBTAG00000011839 ENSBTAG00000012259 ENSBTAG00000019782 ENSBTAG00000020602 ENSBTAG00000005534 ENSBTAG00000006484 ENSBTAG00000006529 ENSBTAG00000007840 ENSBTAG00000008406 ENSBTAG00000008895 ENSBTAG00000011866 ENSBTAG00000013411 ENSBTAG00000013492 …
Heart process	5.64862e-07	22	ENSBTAG00000001865 ENSBTAG00000003826 ENSBTAG00000005373 ENSBTAG00000010880 ENSBTAG00000012319 ENSBTAG00000013347 ENSBTAG00000022158 ENSBTAG00000038849 ENSBTAG00000006902 ENSBTAG00000008406 ENSBTAG00000011500 ENSBTAG00000014583 ENSBTAG00000020569 ENSBTAG00000022699 ENSBTAG00000024888 ENSBTAG00000040053 ENSBTAG00000040584 ENSBTAG00000054592 ENSBTAG00000001575 ENSBTAG00000005714 ENSBTAG00000008394 …
TR2 vs. CTR - Downregulatd genes
Functional Category	Enrichment FDR	Genes in list	Genes
Antigen processing and presentation	1.01494e-06	17	ENSBTAG00000002069 ENSBTAG00000007075 ENSBTAG00000019386 ENSBTAG00000015228 ENSBTAG00000003038 ENSBTAG00000003039 ENSBTAG00000008953 ENSBTAG00000009656 ENSBTAG00000010645 ENSBTAG00000012330 ENSBTAG00000012451 ENSBTAG00000013919 ENSBTAG00000015730 ENSBTAG00000017135 ENSBTAG00000019588 ENSBTAG00000038128 ENSBTAG00000039275
Antigen processing and presentation of peptide antigen	7.39939e-06	11	ENSBTAG00000002069 ENSBTAG00000007075 ENSBTAG00000019386 ENSBTAG00000003038 ENSBTAG00000008953 ENSBTAG00000010645 ENSBTAG00000012330 ENSBTAG00000015730 ENSBTAG00000017135 ENSBTAG00000039275 ENSBTAG00000015228
Extracellular matrix organization	1.14518e-05	26	ENSBTAG00000001027 ENSBTAG00000009513 ENSBTAG00000010175 ENSBTAG00000012409 ENSBTAG00000013103 ENSBTAG00000013472 ENSBTAG00000013662 ENSBTAG00000016424 ENSBTAG00000019807 ENSBTAG00000021211 ENSBTAG00000021316 ENSBTAG00000024081 ENSBTAG00000046193 ENSBTAG00000051541 ENSBTAG00000014665 ENSBTAG00000010793 ENSBTAG00000012088 ENSBTAG00000000087 ENSBTAG00000001745 ENSBTAG00000003165 ENSBTAG00000014912 …
Oxidation-reduction process	6.92543e-05	61	ENSBTAG00000001992 ENSBTAG00000003773 ENSBTAG00000006821 ENSBTAG00000007111 ENSBTAG00000010658 ENSBTAG00000019625 ENSBTAG00000037756 ENSBTAG00000008103 ENSBTAG00000052213 ENSBTAG00000000042 ENSBTAG00000000087 ENSBTAG00000000092 ENSBTAG00000001299 ENSBTAG00000002783 ENSBTAG00000003068 ENSBTAG00000004034 ENSBTAG00000004688 ENSBTAG00000004881 ENSBTAG00000005048 ENSBTAG00000005498 ENSBTAG00000006326 …
Extracellular structure organization	0.000114677	26	ENSBTAG00000001027 ENSBTAG00000009513 ENSBTAG00000010175 ENSBTAG00000012409 ENSBTAG00000013103 ENSBTAG00000013472 ENSBTAG00000013662 ENSBTAG00000016424 ENSBTAG00000019807 ENSBTAG00000021211 ENSBTAG00000021316 ENSBTAG00000024081 ENSBTAG00000046193 ENSBTAG00000051541 ENSBTAG00000014665 ENSBTAG00000010793 ENSBTAG00000012088 ENSBTAG00000000087 ENSBTAG00000001745 ENSBTAG00000003165 ENSBTAG00000014912 …
Antigen processing and presentation of peptide or polysaccharide antigen via MHC class II	0.000114677	8	ENSBTAG00000009656 ENSBTAG00000010645 ENSBTAG00000012451 ENSBTAG00000013919 ENSBTAG00000015730 ENSBTAG00000019588 ENSBTAG00000038128 ENSBTAG00000015228
Small molecule metabolic process	0.000221365	84	ENSBTAG00000000974 ENSBTAG00000001299 ENSBTAG00000001417 ENSBTAG00000001992 ENSBTAG00000002321 ENSBTAG00000002783 ENSBTAG00000002843 ENSBTAG00000002944 ENSBTAG00000003222 ENSBTAG00000004011 ENSBTAG00000004112 ENSBTAG00000004679 ENSBTAG00000004881 ENSBTAG00000005498 ENSBTAG00000005586 ENSBTAG00000005744 ENSBTAG00000006821 ENSBTAG00000007315 ENSBTAG00000008216 ENSBTAG00000009287 ENSBTAG00000010658 …
Defense response to virus	0.000221365	20	ENSBTAG00000008471 ENSBTAG00000009768 ENSBTAG00000019018 ENSBTAG00000030913 ENSBTAG00000039861 ENSBTAG00000007867 ENSBTAG00000018201 ENSBTAG00000001725 ENSBTAG00000004378 ENSBTAG00000007554 ENSBTAG00000008792 ENSBTAG00000013475 ENSBTAG00000014707 ENSBTAG00000016061 ENSBTAG00000030932 ENSBTAG00000031231 ENSBTAG00000038536 ENSBTAG00000046580 ENSBTAG00000052606 ENSBTAG00000004261
Immune response	0.000235916	64	ENSBTAG00000000095 ENSBTAG00000001725 ENSBTAG00000001836 ENSBTAG00000002069 ENSBTAG00000004378 ENSBTAG00000007075 ENSBTAG00000008471 ENSBTAG00000014031 ENSBTAG00000014862 ENSBTAG00000019018 ENSBTAG00000019386 ENSBTAG00000019627 ENSBTAG00000021141 ENSBTAG00000030913 ENSBTAG00000030932 ENSBTAG00000034349 ENSBTAG00000038112 ENSBTAG00000044204 ENSBTAG00000004261 ENSBTAG00000007867 ENSBTAG00000008232 …
System development	0.000235916	158	ENSBTAG00000000033 ENSBTAG00000000588 ENSBTAG00000001865 ENSBTAG00000003304 ENSBTAG00000004159 ENSBTAG00000004231 ENSBTAG00000004378 ENSBTAG00000004587 ENSBTAG00000005604 ENSBTAG00000006138 ENSBTAG00000006977 ENSBTAG00000007173 ENSBTAG00000007766 ENSBTAG00000009852 ENSBTAG00000010191 ENSBTAG00000010635 ENSBTAG00000011104 ENSBTAG00000011338 ENSBTAG00000011742 ENSBTAG00000011934 ENSBTAG00000012047 …
Anatomical structure development	0.000235916	186	ENSBTAG00000000033 ENSBTAG00000000588 ENSBTAG00000001865 ENSBTAG00000003304 ENSBTAG00000004159 ENSBTAG00000004231 ENSBTAG00000004378 ENSBTAG00000004587 ENSBTAG00000005604 ENSBTAG00000006138 ENSBTAG00000006977 ENSBTAG00000007173 ENSBTAG00000007417 ENSBTAG00000007766 ENSBTAG00000009215 ENSBTAG00000009634 ENSBTAG00000009852 ENSBTAG00000009972 ENSBTAG00000010191 ENSBTAG00000010635 ENSBTAG00000011104 …
Multicellular organism development	0.000402345	168	ENSBTAG00000000033 ENSBTAG00000000588 ENSBTAG00000001865 ENSBTAG00000003304 ENSBTAG00000004159 ENSBTAG00000004231 ENSBTAG00000004378 ENSBTAG00000004587 ENSBTAG00000005604 ENSBTAG00000006138 ENSBTAG00000006977 ENSBTAG00000007173 ENSBTAG00000007766 ENSBTAG00000009215 ENSBTAG00000009634 ENSBTAG00000009852 ENSBTAG00000010191 ENSBTAG00000010635 ENSBTAG00000011104 ENSBTAG00000011338 ENSBTAG00000011742 …
Developmental process	0.000422984	194	ENSBTAG00000000033 ENSBTAG00000000588 ENSBTAG00000001865 ENSBTAG00000003304 ENSBTAG00000004159 ENSBTAG00000004231 ENSBTAG00000004378 ENSBTAG00000004587 ENSBTAG00000005604 ENSBTAG00000006138 ENSBTAG00000006977 ENSBTAG00000007173 ENSBTAG00000007417 ENSBTAG00000007766 ENSBTAG00000009215 ENSBTAG00000009634 ENSBTAG00000009830 ENSBTAG00000009852 ENSBTAG00000009972 ENSBTAG00000010191 ENSBTAG00000010635 …
Antigen processing and presentation of endogenous peptide antigen via MHC class I	0.000467254	6	ENSBTAG00000002069 ENSBTAG00000007075 ENSBTAG00000019386 ENSBTAG00000003038 ENSBTAG00000008953 ENSBTAG00000039275
Collagen fibril organization	0.000467254	10	ENSBTAG00000001027 ENSBTAG00000021211 ENSBTAG00000021316 ENSBTAG00000014665 ENSBTAG00000001745 ENSBTAG00000013103 ENSBTAG00000013472 ENSBTAG00000014912 ENSBTAG00000021466 ENSBTAG00000032996
Antigen processing and presentation of endogenous peptide antigen	0.000467254	6	ENSBTAG00000002069 ENSBTAG00000007075 ENSBTAG00000019386 ENSBTAG00000003038 ENSBTAG00000008953 ENSBTAG00000039275
Immune system process	0.000615758	92	ENSBTAG00000000095 ENSBTAG00000001725 ENSBTAG00000001836 ENSBTAG00000002069 ENSBTAG00000004378 ENSBTAG00000007075 ENSBTAG00000007173 ENSBTAG00000008471 ENSBTAG00000009768 ENSBTAG00000012047 ENSBTAG00000014031 ENSBTAG00000014862 ENSBTAG00000019018 ENSBTAG00000019386 ENSBTAG00000019627 ENSBTAG00000021141 ENSBTAG00000030913 ENSBTAG00000030932 ENSBTAG00000031231 ENSBTAG00000034349 ENSBTAG00000038112 …
Antigen processing and presentation of peptide antigen via MHC class I	0.000615758	7	ENSBTAG00000002069 ENSBTAG00000007075 ENSBTAG00000019386 ENSBTAG00000003038 ENSBTAG00000008953 ENSBTAG00000012330 ENSBTAG00000039275
Cell differentiation	0.000896801	135	ENSBTAG00000000588 ENSBTAG00000004231 ENSBTAG00000004378 ENSBTAG00000005604 ENSBTAG00000006138 ENSBTAG00000006977 ENSBTAG00000007173 ENSBTAG00000007417 ENSBTAG00000007766 ENSBTAG00000009215 ENSBTAG00000009830 ENSBTAG00000009972 ENSBTAG00000010191 ENSBTAG00000010635 ENSBTAG00000011104 ENSBTAG00000011338 ENSBTAG00000011742 ENSBTAG00000011934 ENSBTAG00000012047 ENSBTAG00000013369 ENSBTAG00000014605 …
Cell-substrate adhesion	0.00125503	23	ENSBTAG00000009080 ENSBTAG00000018169 ENSBTAG00000019627 ENSBTAG00000024081 ENSBTAG00000010793 ENSBTAG00000010976 ENSBTAG00000012088 ENSBTAG00000018790 ENSBTAG00000000087 ENSBTAG00000003165 ENSBTAG00000007766 ENSBTAG00000008300 ENSBTAG00000012047 ENSBTAG00000013103 ENSBTAG00000013662 ENSBTAG00000014051 ENSBTAG00000014721 ENSBTAG00000019289 ENSBTAG00000021466 ENSBTAG00000026972 ENSBTAG00000033197 …
Cellular amino acid metabolic process	0.00175135	22	ENSBTAG00000000974 ENSBTAG00000002321 ENSBTAG00000002783 ENSBTAG00000003222 ENSBTAG00000004112 ENSBTAG00000004679 ENSBTAG00000005586 ENSBTAG00000007315 ENSBTAG00000011960 ENSBTAG00000012962 ENSBTAG00000013081 ENSBTAG00000013960 ENSBTAG00000020602 ENSBTAG00000032996 ENSBTAG00000039719 ENSBTAG00000000042 ENSBTAG00000002980 ENSBTAG00000004358 ENSBTAG00000006795 ENSBTAG00000007835 ENSBTAG00000021168 …
Blood circulation	0.00201972	25	ENSBTAG00000001865 ENSBTAG00000012319 ENSBTAG00000013347 ENSBTAG00000033731 ENSBTAG00000052213 ENSBTAG00000002333 ENSBTAG00000005163 ENSBTAG00000006716 ENSBTAG00000006902 ENSBTAG00000008236 ENSBTAG00000008332 ENSBTAG00000011500 ENSBTAG00000011896 ENSBTAG00000013472 ENSBTAG00000014051 ENSBTAG00000016007 ENSBTAG00000018520 ENSBTAG00000034987 ENSBTAG00000054592 ENSBTAG00000003100 ENSBTAG00000005714 …
Glomerulus development	0.00201972	9	ENSBTAG00000002606 ENSBTAG00000008332 ENSBTAG00000014051 ENSBTAG00000021316 ENSBTAG00000043971 ENSBTAG00000007173 ENSBTAG00000018966 ENSBTAG00000052213 ENSBTAG00000020407
Alcohol metabolic process	0.0032183	22	ENSBTAG00000001992 ENSBTAG00000005498 ENSBTAG00000006821 ENSBTAG00000009287 ENSBTAG00000011934 ENSBTAG00000016465 ENSBTAG00000017819 ENSBTAG00000018201 ENSBTAG00000018966 ENSBTAG00000025496 ENSBTAG00000002101 ENSBTAG00000003948 ENSBTAG00000005744 ENSBTAG00000008103 ENSBTAG00000011866 ENSBTAG00000011960 ENSBTAG00000012314 ENSBTAG00000015849 ENSBTAG00000016007 ENSBTAG00000016886 ENSBTAG00000004688 …
Circulatory system process	0.0032183	25	ENSBTAG00000001865 ENSBTAG00000012319 ENSBTAG00000013347 ENSBTAG00000033731 ENSBTAG00000052213 ENSBTAG00000002333 ENSBTAG00000005163 ENSBTAG00000006716 ENSBTAG00000006902 ENSBTAG00000008236 ENSBTAG00000008332 ENSBTAG00000011500 ENSBTAG00000011896 ENSBTAG00000013472 ENSBTAG00000014051 ENSBTAG00000016007 ENSBTAG00000018520 ENSBTAG00000034987 ENSBTAG00000054592 ENSBTAG00000003100 ENSBTAG00000005714 …
Response to virus	0.00324136	20	ENSBTAG00000008471 ENSBTAG00000009768 ENSBTAG00000019018 ENSBTAG00000030913 ENSBTAG00000039861 ENSBTAG00000007867 ENSBTAG00000018201 ENSBTAG00000001725 ENSBTAG00000004378 ENSBTAG00000007554 ENSBTAG00000008792 ENSBTAG00000013475 ENSBTAG00000014707 ENSBTAG00000016061 ENSBTAG00000030932 ENSBTAG00000031231 ENSBTAG00000038536 ENSBTAG00000046580 ENSBTAG00000052606 ENSBTAG00000004261
L-serine biosynthetic process	0.00350333	3	ENSBTAG00000013081 ENSBTAG00000013960 ENSBTAG00000039719
Sterol biosynthetic process	0.00420854	8	ENSBTAG00000001992 ENSBTAG00000003068 ENSBTAG00000005498 ENSBTAG00000009287 ENSBTAG00000016465 ENSBTAG00000017819 ENSBTAG00000003948 ENSBTAG00000004688
Innate immune response	0.00421616	32	ENSBTAG00000001836 ENSBTAG00000008471 ENSBTAG00000014031 ENSBTAG00000014862 ENSBTAG00000019018 ENSBTAG00000030913 ENSBTAG00000038112 ENSBTAG00000007867 ENSBTAG00000008232 ENSBTAG00000018201 ENSBTAG00000002606 ENSBTAG00000003525 ENSBTAG00000007554 ENSBTAG00000008792 ENSBTAG00000011104 ENSBTAG00000013475 ENSBTAG00000014707 ENSBTAG00000015060 ENSBTAG00000016061 ENSBTAG00000016078 ENSBTAG00000016656 …
Cellular developmental process	0.00421616	137	ENSBTAG00000000588 ENSBTAG00000004231 ENSBTAG00000004378 ENSBTAG00000005604 ENSBTAG00000006138 ENSBTAG00000006977 ENSBTAG00000007173 ENSBTAG00000007417 ENSBTAG00000007766 ENSBTAG00000009215 ENSBTAG00000009830 ENSBTAG00000009972 ENSBTAG00000010191 ENSBTAG00000010635 ENSBTAG00000011104 ENSBTAG00000011338 ENSBTAG00000011742 ENSBTAG00000011934 ENSBTAG00000012047 ENSBTAG00000013369 ENSBTAG00000013749 …
TR3 vs. CTR - Downregulatd genes
Functional Category	Enrichment FDR	Genes in list	Genes
Antigen processing and presentation	0.000121854	14	ENSBTAG00000002069 ENSBTAG00000019386 ENSBTAG00000015228 ENSBTAG00000003039 ENSBTAG00000008406 ENSBTAG00000009656 ENSBTAG00000010645 ENSBTAG00000012330 ENSBTAG00000012451 ENSBTAG00000013919 ENSBTAG00000015114 ENSBTAG00000015730 ENSBTAG00000019588 ENSBTAG00000038128
Immune system process	0.000121854	93	ENSBTAG00000002069 ENSBTAG00000004815 ENSBTAG00000007173 ENSBTAG00000008471 ENSBTAG00000009691 ENSBTAG00000010738 ENSBTAG00000012771 ENSBTAG00000013118 ENSBTAG00000014031 ENSBTAG00000014737 ENSBTAG00000014862 ENSBTAG00000019017 ENSBTAG00000019018 ENSBTAG00000019386 ENSBTAG00000030913 ENSBTAG00000034349 ENSBTAG00000039682 ENSBTAG00000046110 ENSBTAG00000047441 ENSBTAG00000005359 ENSBTAG00000006505 …
Antigen processing and presentation of peptide or polysaccharide antigen via MHC class II	0.0001265	8	ENSBTAG00000009656 ENSBTAG00000010645 ENSBTAG00000012451 ENSBTAG00000013919 ENSBTAG00000015730 ENSBTAG00000019588 ENSBTAG00000038128 ENSBTAG00000015228
Protein folding	0.000464462	18	ENSBTAG00000007662 ENSBTAG00000012003 ENSBTAG00000013162 ENSBTAG00000016451 ENSBTAG00000017143 ENSBTAG00000047441 ENSBTAG00000015228 ENSBTAG00000000778 ENSBTAG00000003362 ENSBTAG00000005012 ENSBTAG00000006165 ENSBTAG00000006370 ENSBTAG00000014233 ENSBTAG00000015114 ENSBTAG00000016265 ENSBTAG00000034987 ENSBTAG00000051519 ENSBTAG00000051880
Immune response	0.00371973	58	ENSBTAG00000002069 ENSBTAG00000004815 ENSBTAG00000008471 ENSBTAG00000009691 ENSBTAG00000010738 ENSBTAG00000013118 ENSBTAG00000014031 ENSBTAG00000014862 ENSBTAG00000019017 ENSBTAG00000019018 ENSBTAG00000019386 ENSBTAG00000030913 ENSBTAG00000034349 ENSBTAG00000005359 ENSBTAG00000006505 ENSBTAG00000015228 ENSBTAG00000016533 ENSBTAG00000018201 ENSBTAG00000021968 ENSBTAG00000000778 ENSBTAG00000003232 …
Positive regulation of molecular function	0.00531949	66	ENSBTAG00000003033 ENSBTAG00000003257 ENSBTAG00000007636 ENSBTAG00000010738 ENSBTAG00000011727 ENSBTAG00000011742 ENSBTAG00000013699 ENSBTAG00000017024 ENSBTAG00000017160 ENSBTAG00000018671 ENSBTAG00000025313 ENSBTAG00000025898 ENSBTAG00000005359 ENSBTAG00000006505 ENSBTAG00000009844 ENSBTAG00000010018 ENSBTAG00000014583 ENSBTAG00000015228 ENSBTAG00000051333 ENSBTAG00000000333 ENSBTAG00000000778 …
Regulation of multicellular organismal process	0.00895395	102	ENSBTAG00000000588 ENSBTAG00000002144 ENSBTAG00000004587 ENSBTAG00000006432 ENSBTAG00000007636 ENSBTAG00000013793 ENSBTAG00000014737 ENSBTAG00000014862 ENSBTAG00000000188 ENSBTAG00000005359 ENSBTAG00000005985 ENSBTAG00000007173 ENSBTAG00000008028 ENSBTAG00000008448 ENSBTAG00000009844 ENSBTAG00000012007 ENSBTAG00000015228 ENSBTAG00000018201 ENSBTAG00000020000 ENSBTAG00000024379 ENSBTAG00000000778 …
Positive regulation of catalytic activity	0.0167854	53	ENSBTAG00000003033 ENSBTAG00000003257 ENSBTAG00000010738 ENSBTAG00000011727 ENSBTAG00000011742 ENSBTAG00000013699 ENSBTAG00000017160 ENSBTAG00000018671 ENSBTAG00000025313 ENSBTAG00000025898 ENSBTAG00000005359 ENSBTAG00000006505 ENSBTAG00000009844 ENSBTAG00000010018 ENSBTAG00000015228 ENSBTAG00000000333 ENSBTAG00000000778 ENSBTAG00000001938 ENSBTAG00000002144 ENSBTAG00000002472 ENSBTAG00000003334 …
Antigen processing and presentation of peptide antigen	0.0167854	7	ENSBTAG00000002069 ENSBTAG00000019386 ENSBTAG00000010645 ENSBTAG00000012330 ENSBTAG00000015114 ENSBTAG00000015730 ENSBTAG00000015228
Protein heterooligomerization	0.0167854	9	ENSBTAG00000037644 ENSBTAG00000038748 ENSBTAG00000051412 ENSBTAG00000015228 ENSBTAG00000006103 ENSBTAG00000006276 ENSBTAG00000010207 ENSBTAG00000011866 ENSBTAG00000016139
Response to stress	0.0192941	113	ENSBTAG00000001773 ENSBTAG00000002472 ENSBTAG00000003015 ENSBTAG00000003257 ENSBTAG00000003362 ENSBTAG00000004815 ENSBTAG00000006065 ENSBTAG00000006103 ENSBTAG00000006165 ENSBTAG00000007115 ENSBTAG00000007662 ENSBTAG00000008471 ENSBTAG00000010738 ENSBTAG00000011727 ENSBTAG00000011742 ENSBTAG00000013162 ENSBTAG00000013225 ENSBTAG00000014031 ENSBTAG00000014737 ENSBTAG00000014862 ENSBTAG00000015727 …
Regulation of molecular function	0.0192941	106	ENSBTAG00000001027 ENSBTAG00000003033 ENSBTAG00000003257 ENSBTAG00000006432 ENSBTAG00000007636 ENSBTAG00000010738 ENSBTAG00000011727 ENSBTAG00000011742 ENSBTAG00000013475 ENSBTAG00000013699 ENSBTAG00000013793 ENSBTAG00000014862 ENSBTAG00000017024 ENSBTAG00000017160 ENSBTAG00000018671 ENSBTAG00000025313 ENSBTAG00000025898 ENSBTAG00000046286 ENSBTAG00000005359 ENSBTAG00000006505 ENSBTAG00000008028 …
MHC protein complex assembly	0.0205354	3	ENSBTAG00000010645 ENSBTAG00000015114 ENSBTAG00000015730
Peptide antigen assembly with MHC protein complex	0.0205354	3	ENSBTAG00000010645 ENSBTAG00000015114 ENSBTAG00000015730
Innate immune response	0.0290253	29	ENSBTAG00000004815 ENSBTAG00000008471 ENSBTAG00000010738 ENSBTAG00000014031 ENSBTAG00000014862 ENSBTAG00000019017 ENSBTAG00000019018 ENSBTAG00000030913 ENSBTAG00000018201 ENSBTAG00000021968 ENSBTAG00000000778 ENSBTAG00000006103 ENSBTAG00000006505 ENSBTAG00000007636 ENSBTAG00000008406 ENSBTAG00000008792 ENSBTAG00000010042 ENSBTAG00000011511 ENSBTAG00000012638 ENSBTAG00000013475 ENSBTAG00000014707 …
de novo protein folding	0.0296197	6	ENSBTAG00000007662 ENSBTAG00000013162 ENSBTAG00000016451 ENSBTAG00000047441 ENSBTAG00000015228 ENSBTAG00000005012
Fat cell differentiation	0.0296197	16	ENSBTAG00000016139 ENSBTAG00000002144 ENSBTAG00000003039 ENSBTAG00000003257 ENSBTAG00000003650 ENSBTAG00000008271 ENSBTAG00000009691 ENSBTAG00000017024 ENSBTAG00000034987 ENSBTAG00000040390 ENSBTAG00000044105 ENSBTAG00000046307 ENSBTAG00000013306 ENSBTAG00000015604 ENSBTAG00000051333 ENSBTAG00000052562
Defense response to virus	0.0296197	15	ENSBTAG00000008471 ENSBTAG00000019017 ENSBTAG00000019018 ENSBTAG00000030913 ENSBTAG00000018201 ENSBTAG00000000163 ENSBTAG00000008406 ENSBTAG00000008792 ENSBTAG00000010042 ENSBTAG00000013475 ENSBTAG00000014707 ENSBTAG00000014849 ENSBTAG00000023144 ENSBTAG00000053806 ENSBTAG00000013556
Nucleoside phosphate biosynthetic process	0.0357131	20	ENSBTAG00000001626 ENSBTAG00000018777 ENSBTAG00000020602 ENSBTAG00000032057 ENSBTAG00000032812 ENSBTAG00000000163 ENSBTAG00000003328 ENSBTAG00000005152 ENSBTAG00000007121 ENSBTAG00000007125 ENSBTAG00000008406 ENSBTAG00000010564 ENSBTAG00000012885 ENSBTAG00000012927 ENSBTAG00000014069 ENSBTAG00000015358 ENSBTAG00000017024 ENSBTAG00000035370 ENSBTAG00000043564 ENSBTAG00000051340
Response to interferon-beta	0.0357131	5	ENSBTAG00000015727 ENSBTAG00000019017 ENSBTAG00000019018 ENSBTAG00000008406 ENSBTAG00000011511
Regulation of catalytic activity	0.0357131	77	ENSBTAG00000001027 ENSBTAG00000003033 ENSBTAG00000003257 ENSBTAG00000007636 ENSBTAG00000010738 ENSBTAG00000011727 ENSBTAG00000011742 ENSBTAG00000013699 ENSBTAG00000017160 ENSBTAG00000018671 ENSBTAG00000025313 ENSBTAG00000025898 ENSBTAG00000046286 ENSBTAG00000005359 ENSBTAG00000006505 ENSBTAG00000008028 ENSBTAG00000009844 ENSBTAG00000010018 ENSBTAG00000015228 ENSBTAG00000000333 ENSBTAG00000000778 …
Cold-induced thermogenesis	0.0357131	11	ENSBTAG00000002144 ENSBTAG00000007116 ENSBTAG00000008026 ENSBTAG00000010564 ENSBTAG00000016615 ENSBTAG00000017024 ENSBTAG00000017326 ENSBTAG00000017397 ENSBTAG00000040390 ENSBTAG00000002170 ENSBTAG00000017086
Regulation of cold-induced thermogenesis	0.0357131	11	ENSBTAG00000002144 ENSBTAG00000007116 ENSBTAG00000008026 ENSBTAG00000010564 ENSBTAG00000016615 ENSBTAG00000017024 ENSBTAG00000017326 ENSBTAG00000017397 ENSBTAG00000040390 ENSBTAG00000002170 ENSBTAG00000017086
Adaptive thermogenesis	0.045762	11	ENSBTAG00000002144 ENSBTAG00000007116 ENSBTAG00000008026 ENSBTAG00000010564 ENSBTAG00000016615 ENSBTAG00000017024 ENSBTAG00000017326 ENSBTAG00000017397 ENSBTAG00000040390 ENSBTAG00000002170 ENSBTAG00000017086
Nucleoside phosphate metabolic process	0.045762	29	ENSBTAG00000001626 ENSBTAG00000011095 ENSBTAG00000018777 ENSBTAG00000020602 ENSBTAG00000023823 ENSBTAG00000032057 ENSBTAG00000032812 ENSBTAG00000039440 ENSBTAG00000003410 ENSBTAG00000013162 ENSBTAG00000017567 ENSBTAG00000000163 ENSBTAG00000002480 ENSBTAG00000003328 ENSBTAG00000005152 ENSBTAG00000007121 ENSBTAG00000007125 ENSBTAG00000008406 ENSBTAG00000010564 ENSBTAG00000012885 ENSBTAG00000012927 …
Regulation of response to stimulus	0.045762	123	ENSBTAG00000002069 ENSBTAG00000003015 ENSBTAG00000003033 ENSBTAG00000004587 ENSBTAG00000004815 ENSBTAG00000005359 ENSBTAG00000005723 ENSBTAG00000007164 ENSBTAG00000007173 ENSBTAG00000007417 ENSBTAG00000007636 ENSBTAG00000008121 ENSBTAG00000009461 ENSBTAG00000009691 ENSBTAG00000010738 ENSBTAG00000011727 ENSBTAG00000012007 ENSBTAG00000012771 ENSBTAG00000014031 ENSBTAG00000014737 ENSBTAG00000014862 …
Positive regulation of hydrolase activity	0.045762	31	ENSBTAG00000010738 ENSBTAG00000013699 ENSBTAG00000017160 ENSBTAG00000025313 ENSBTAG00000025898 ENSBTAG00000006505 ENSBTAG00000009844 ENSBTAG00000000333 ENSBTAG00000000778 ENSBTAG00000002472 ENSBTAG00000003334 ENSBTAG00000003959 ENSBTAG00000004685 ENSBTAG00000006039 ENSBTAG00000006065 ENSBTAG00000008028 ENSBTAG00000009658 ENSBTAG00000012088 ENSBTAG00000014140 ENSBTAG00000014583 ENSBTAG00000015358 …
