# Supplementary material for: Supranutritional Maternal Organic Selenium Supplementation during Different Trimesters of Pregnancy Affects the Muscle Gene Transcriptome of Newborn Beef Calves in a Time-Dependent Manner
Source: Genes (Basel). 2021 Nov 25;12(12):1884. doi: 10.3390/genes12121884 (PMC8701265; doi:10.3390/genes12121884)
Supplement: Supplementary file 1 [file genes-12-01884-s001.zip › Supplementary Table S8_.xlsx]

## Sheet: Description
Supranutritional Maternal Organic Selenium Supplementation During Different Trimesters of Pregnancy Affects the Muscle Gene Transcriptome of Newborn Beef Calves in a Time-dependent Manner
Wellison J. S. Diniz 1,*; Gerd Bobe 2,3; Joseph J. Klopfenstein 4; Yunus Gultekin 2; T. Zane Davis 5; Alison K. Ward 6; Jean A. Hall 7,*
1 Department of Animal Sciences, Auburn University; Auburn, AL 3849, USA; wzd0027@auburn.edu 2 Department of Animal and Rangeland Sciences, College of Agricultural Sciences, Oregon State University, Corvallis, OR, USA; yunus.gultekin@oregonstate.edu; gerd.bobe@oregonstate.edu 3 Linus Pauling Institute, Oregon State University, Corvallis, OR 97331, USA; 4 Department of Clinical Sciences, Carlson C…
Data Description
Tab 1.	Over-represented KEGG pathways of upregulated genes for each of the group contrasts from muscle tissue.

## Sheet: Tab. 1
Over-represented KEGG pathways of upregulated genes for each of the group contrasts from muscle tissue.
TR1 vs. CTR
TR2 vs. CTR
TR3 vs. CTR
TR1 vs. CTR - Upregulatd genes
Pathway ID	Pathway Description	EnrichmentRatio	FDR	Ensembl ID
bta03320	PPAR signaling pathway	6.05937	1.64586e-05	ENSBTAG00000001936;ENSBTAG00000002473;ENSBTAG00000002880;ENSBTAG00000004344;ENSBTAG00000004860;ENSBTAG00000004893;ENSBTAG00000005718;ENSBTAG00000015350;ENSBTAG00000016819;ENSBTAG00000021999;ENSBTAG00000030174;ENSBTAG00000032436;ENSBTAG00000037526;ENSBTAG00000038464
bta04068	FoxO signaling pathway	3.53463	0.00385207	ENSBTAG00000001936;ENSBTAG00000004879;ENSBTAG00000008353;ENSBTAG00000011234;ENSBTAG00000011628;ENSBTAG00000011765;ENSBTAG00000013860;ENSBTAG00000014883;ENSBTAG00000016194;ENSBTAG00000017804;ENSBTAG00000018984;ENSBTAG00000020980;ENSBTAG00000021527;ENSBTAG00000025462
bta04923	Regulation of lipolysis in adipocytes	5.26208	0.00385207	ENSBTAG00000002714;ENSBTAG00000005144;ENSBTAG00000005464;ENSBTAG00000015350;ENSBTAG00000016629;ENSBTAG00000018248;ENSBTAG00000018984;ENSBTAG00000037526;ENSBTAG00000038321
bta04216	Ferroptosis	5.92472	0.00385207	ENSBTAG00000004344;ENSBTAG00000006135;ENSBTAG00000011632;ENSBTAG00000013343;ENSBTAG00000013343;ENSBTAG00000015582;ENSBTAG00000017363;ENSBTAG00000035827
bta00480	Glutathione metabolism	4.99898	0.00403514	ENSBTAG00000001842;ENSBTAG00000003989;ENSBTAG00000006608;ENSBTAG00000008541;ENSBTAG00000010371;ENSBTAG00000037673;ENSBTAG00000038540;ENSBTAG00000043553;ENSBTAG00000046900
bta04152	AMPK signaling pathway	3.52232	0.00403514	ENSBTAG00000001936;ENSBTAG00000004248;ENSBTAG00000007884;ENSBTAG00000011234;ENSBTAG00000012987;ENSBTAG00000013699;ENSBTAG00000018984;ENSBTAG00000021527;ENSBTAG00000021999;ENSBTAG00000022058;ENSBTAG00000027654;ENSBTAG00000034222;ENSBTAG00000038321
bta04931	Insulin resistance	3.66898	0.00440024	ENSBTAG00000001936;ENSBTAG00000004625;ENSBTAG00000004860;ENSBTAG00000007884;ENSBTAG00000009153;ENSBTAG00000009617;ENSBTAG00000010606;ENSBTAG00000010664;ENSBTAG00000016683;ENSBTAG00000018984;ENSBTAG00000021999;ENSBTAG00000022058
bta04140	Autophagy	3.25748	0.00674331	ENSBTAG00000009765;ENSBTAG00000010664;ENSBTAG00000011765;ENSBTAG00000011820;ENSBTAG00000012987;ENSBTAG00000014883;ENSBTAG00000017325;ENSBTAG00000017804;ENSBTAG00000018984;ENSBTAG00000020417;ENSBTAG00000021527;ENSBTAG00000035827;ENSBTAG00000038335
bta04211	Longevity regulating pathway	3.70295	0.0121199	ENSBTAG00000003015;ENSBTAG00000005464;ENSBTAG00000011234;ENSBTAG00000012987;ENSBTAG00000016629;ENSBTAG00000017325;ENSBTAG00000018984;ENSBTAG00000020980;ENSBTAG00000021527;ENSBTAG00000027654
bta04066	HIF-1 signaling pathway	3.40067	0.0216567	ENSBTAG00000008353;ENSBTAG00000009617;ENSBTAG00000011628;ENSBTAG00000015582;ENSBTAG00000018049;ENSBTAG00000018474;ENSBTAG00000018984;ENSBTAG00000021527;ENSBTAG00000021811;ENSBTAG00000027654
TR2 vs. CTR - Upregulatd genes
Pathway ID	Pathway Description	EnrichmentRatio	FDR	Ensembl ID
bta04152	AMPK signaling pathway	3.61543	0.000172409	ENSBTAG00000000286;ENSBTAG00000001936;ENSBTAG00000004248;ENSBTAG00000004258;ENSBTAG00000006752;ENSBTAG00000008401;ENSBTAG00000009050;ENSBTAG00000009190;ENSBTAG00000011234;ENSBTAG00000012987;ENSBTAG00000019298;ENSBTAG00000021999;ENSBTAG00000022058;ENSBTAG00000027654;ENSBTAG00000038321;ENSBTAG00000040055
bta04920	Adipocytokine signaling pathway	2.11635	0.038065	ENSBTAG00000001936;ENSBTAG00000007599;ENSBTAG00000009050;ENSBTAG00000009190;ENSBTAG00000009617;ENSBTAG00000010664;ENSBTAG00000016683;ENSBTAG00000021999;ENSBTAG00000022058
bta04068	FoxO signaling pathway	3.87998	0.0517004	ENSBTAG00000001936;ENSBTAG00000004879;ENSBTAG00000007599;ENSBTAG00000008353;ENSBTAG00000009190;ENSBTAG00000011234;ENSBTAG00000011628;ENSBTAG00000011765;ENSBTAG00000013860;ENSBTAG00000016194;ENSBTAG00000019574;ENSBTAG00000025462
bta04010	MAPK signaling pathway	8.58298	0.0602228	ENSBTAG00000000223;ENSBTAG00000004037;ENSBTAG00000004322;ENSBTAG00000006253;ENSBTAG00000007084;ENSBTAG00000007599;ENSBTAG00000007807;ENSBTAG00000008409;ENSBTAG00000010223;ENSBTAG00000011628;ENSBTAG00000012450;ENSBTAG00000013860;ENSBTAG00000013863;ENSBTAG00000017639;ENSBTAG00000017994;ENSBTAG00000019574;ENSBTAG00000021912;ENSBTAG00000025441;ENSBTAG00000025462
bta05216	Thyroid cancer	1.17575	0.0602228	ENSBTAG00000000570;ENSBTAG00000008353;ENSBTAG00000008409;ENSBTAG00000013860;ENSBTAG00000019354;ENSBTAG00000025462
bta04657	IL-17 signaling pathway	2.64544	0.0602228	ENSBTAG00000004037;ENSBTAG00000004322;ENSBTAG00000005865;ENSBTAG00000006505;ENSBTAG00000007599;ENSBTAG00000008182;ENSBTAG00000016683;ENSBTAG00000019574;ENSBTAG00000037778
bta04931	Insulin resistance	3.20392	0.0602228	ENSBTAG00000001936;ENSBTAG00000004189;ENSBTAG00000007599;ENSBTAG00000009190;ENSBTAG00000009617;ENSBTAG00000010664;ENSBTAG00000016683;ENSBTAG00000017639;ENSBTAG00000021999;ENSBTAG00000022058
bta05220	Chronic myeloid leukemia	2.23393	0.0602228	ENSBTAG00000006526;ENSBTAG00000007599;ENSBTAG00000008353;ENSBTAG00000008409;ENSBTAG00000013860;ENSBTAG00000016683;ENSBTAG00000017976;ENSBTAG00000025462
bta03320	PPAR signaling pathway	2.26332	0.0602228	ENSBTAG00000001936;ENSBTAG00000002258;ENSBTAG00000002473;ENSBTAG00000002880;ENSBTAG00000005718;ENSBTAG00000021999;ENSBTAG00000032436;ENSBTAG00000038464
bta04216	Ferroptosis	1.32272	0.0602228	ENSBTAG00000006135;ENSBTAG00000011632;ENSBTAG00000013343;ENSBTAG00000013343;ENSBTAG00000015582;ENSBTAG00000019225
TR3 vs. CTR - Upregulatd genes
Pathway ID	Pathway Description	EnrichmentRatio	FDR	Ensembl ID
bta00260	Glycine, serine and threonine metabolism	6.94697	0.000699734	ENSBTAG00000001908;ENSBTAG00000004118;ENSBTAG00000013081;ENSBTAG00000014791;ENSBTAG00000016206;ENSBTAG00000021695;ENSBTAG00000030334;ENSBTAG00000031500;ENSBTAG00000039719
bta04931	Insulin resistance	4.26307	0.000699734	ENSBTAG00000001936;ENSBTAG00000004860;ENSBTAG00000005474;ENSBTAG00000007599;ENSBTAG00000007884;ENSBTAG00000009153;ENSBTAG00000009190;ENSBTAG00000010606;ENSBTAG00000011934;ENSBTAG00000013492;ENSBTAG00000016336;ENSBTAG00000021741;ENSBTAG00000021999;ENSBTAG00000022058
bta04152	AMPK signaling pathway	3.508	0.00841297	ENSBTAG00000001936;ENSBTAG00000005474;ENSBTAG00000006752;ENSBTAG00000007884;ENSBTAG00000009190;ENSBTAG00000011934;ENSBTAG00000012987;ENSBTAG00000013492;ENSBTAG00000020277;ENSBTAG00000021999;ENSBTAG00000022058;ENSBTAG00000034222;ENSBTAG00000038321
bta01230	Biosynthesis of amino acids	4.09205	0.0219907	ENSBTAG00000000042;ENSBTAG00000001945;ENSBTAG00000003222;ENSBTAG00000013081;ENSBTAG00000014791;ENSBTAG00000020873;ENSBTAG00000031500;ENSBTAG00000039719;ENSBTAG00000047997
bta04964	Proximal tubule bicarbonate reclamation	7.54342	0.0219907	ENSBTAG00000001936;ENSBTAG00000002688;ENSBTAG00000010551;ENSBTAG00000011934;ENSBTAG00000017969
bta04022	cGMP-PKG signaling pathway	2.83338	0.0219907	ENSBTAG00000001398;ENSBTAG00000002688;ENSBTAG00000002714;ENSBTAG00000005464;ENSBTAG00000005474;ENSBTAG00000007129;ENSBTAG00000010551;ENSBTAG00000011461;ENSBTAG00000013116;ENSBTAG00000013245;ENSBTAG00000013861;ENSBTAG00000014818;ENSBTAG00000016711;ENSBTAG00000033983
