# Supplementary material for: Supranutritional Maternal Organic Selenium Supplementation during Different Trimesters of Pregnancy Affects the Muscle Gene Transcriptome of Newborn Beef Calves in a Time-Dependent Manner
Source: Genes (Basel). 2021 Nov 25;12(12):1884. doi: 10.3390/genes12121884 (PMC8701265; doi:10.3390/genes12121884)
Supplement: Supplementary file 1 [file genes-12-01884-s001.zip › Supplementary Table S9_.xlsx]

## Sheet: Description
Supranutritional Maternal Organic Selenium Supplementation During Different Trimesters of Pregnancy Affects the Muscle Gene Transcriptome of Newborn Beef Calves in a Time-dependent Manner
Wellison J. S. Diniz 1,*; Gerd Bobe 2,3; Joseph J. Klopfenstein 4; Yunus Gultekin 2; T. Zane Davis 5; Alison K. Ward 6; Jean A. Hall 7,*
1 Department of Animal Sciences, Auburn University; Auburn, AL 3849, USA; wzd0027@auburn.edu 2 Department of Animal and Rangeland Sciences, College of Agricultural Sciences, Oregon State University, Corvallis, OR, USA; yunus.gultekin@oregonstate.edu; gerd.bobe@oregonstate.edu 3 Linus Pauling Institute, Oregon State University, Corvallis, OR 97331, USA; 4 Department of Clinical Sciences, Carlson C…
Data Description
Tab 1.	Over-represented KEGG pathways of downregulated genes for each of the group contrasts from muscle tissue.

## Sheet: Tab. 1
Over-represented KEGG pathways of downregulated genes for each of the group contrasts from muscle tissue.
TR1 vs. CTR
TR2 vs. CTR
TR3 vs. CTR
TR1 vs. CTR - Downregulatd genes
Pathway ID	Pathway Description	EnrichmentRatio	FDR	Ensembl ID
bta04612	Antigen processing and presentation	5.91345	1.17507e-06	ENSBTAG00000002069;ENSBTAG00000007075;ENSBTAG00000009656;ENSBTAG00000010645;ENSBTAG00000012330;ENSBTAG00000012330;ENSBTAG00000012451;ENSBTAG00000013162;ENSBTAG00000013919;ENSBTAG00000015114;ENSBTAG00000015228;ENSBTAG00000015730;ENSBTAG00000019386;ENSBTAG00000019588;ENSBTAG00000021141;ENSBTAG00000038128
bta01230	Biosynthesis of amino acids	6.37924	1.17507e-06	ENSBTAG00000000160;ENSBTAG00000000894;ENSBTAG00000001601;ENSBTAG00000002980;ENSBTAG00000003222;ENSBTAG00000005534;ENSBTAG00000007835;ENSBTAG00000011832;ENSBTAG00000013081;ENSBTAG00000013411;ENSBTAG00000013960;ENSBTAG00000014547;ENSBTAG00000019700;ENSBTAG00000019782;ENSBTAG00000039719
bta01100	Metabolic pathways	1.84545	1.17507e-06	ENSBTAG00000000033;ENSBTAG00000000160;ENSBTAG00000000795;ENSBTAG00000000894;ENSBTAG00000001003;ENSBTAG00000001021;ENSBTAG00000001116;ENSBTAG00000001601;ENSBTAG00000001626;ENSBTAG00000001770;ENSBTAG00000001992;ENSBTAG00000002980;ENSBTAG00000003068;ENSBTAG00000003222;ENSBTAG00000004112;ENSBTAG00000004118;ENSBTAG00000004256;ENSBTAG00000004688;ENSBTAG00000004781;ENSBTAG00000004881;ENSBTAG00000004931;…
bta01200	Carbon metabolism	4.71228	7.10255e-06	ENSBTAG00000000894;ENSBTAG00000001601;ENSBTAG00000002980;ENSBTAG00000005534;ENSBTAG00000006396;ENSBTAG00000007835;ENSBTAG00000009951;ENSBTAG00000013081;ENSBTAG00000013411;ENSBTAG00000013960;ENSBTAG00000014547;ENSBTAG00000015221;ENSBTAG00000019625;ENSBTAG00000019700;ENSBTAG00000019782;ENSBTAG00000019852;ENSBTAG00000039719
bta00260	Glycine, serine and threonine metabolism	7.21991	4.84859e-05	ENSBTAG00000000160;ENSBTAG00000004112;ENSBTAG00000004118;ENSBTAG00000005586;ENSBTAG00000008895;ENSBTAG00000013081;ENSBTAG00000013178;ENSBTAG00000013960;ENSBTAG00000014547;ENSBTAG00000039719
bta05330	Allograft rejection	6.20913	5.68211e-05	ENSBTAG00000002069;ENSBTAG00000007075;ENSBTAG00000009656;ENSBTAG00000010645;ENSBTAG00000012451;ENSBTAG00000013919;ENSBTAG00000015730;ENSBTAG00000019386;ENSBTAG00000019588;ENSBTAG00000020736;ENSBTAG00000038128
bta05332	Graft-versus-host disease	6.60545	8.34676e-05	ENSBTAG00000002069;ENSBTAG00000007075;ENSBTAG00000009656;ENSBTAG00000010645;ENSBTAG00000012451;ENSBTAG00000013919;ENSBTAG00000015730;ENSBTAG00000019386;ENSBTAG00000019588;ENSBTAG00000038128
bta05416	Viral myocarditis	5.10339	0.000123616	ENSBTAG00000001865;ENSBTAG00000002069;ENSBTAG00000007075;ENSBTAG00000009656;ENSBTAG00000010645;ENSBTAG00000012451;ENSBTAG00000013919;ENSBTAG00000015730;ENSBTAG00000019386;ENSBTAG00000019588;ENSBTAG00000020736;ENSBTAG00000038128
bta00010	Glycolysis / Gluconeogenesis	5.33597	0.00018202	ENSBTAG00000000894;ENSBTAG00000001601;ENSBTAG00000005534;ENSBTAG00000006396;ENSBTAG00000008683;ENSBTAG00000008895;ENSBTAG00000011934;ENSBTAG00000013411;ENSBTAG00000014547;ENSBTAG00000019782;ENSBTAG00000019852
bta05410	Hypertrophic cardiomyopathy (HCM)	4.65684	0.000265132	ENSBTAG00000001865;ENSBTAG00000002036;ENSBTAG00000005373;ENSBTAG00000005714;ENSBTAG00000007547;ENSBTAG00000008394;ENSBTAG00000009080;ENSBTAG00000013492;ENSBTAG00000014387;ENSBTAG00000018747;ENSBTAG00000020569;ENSBTAG00000021808
TR2 vs. CTR - Downregulatd genes
Pathway ID	Pathway Description	EnrichmentRatio	FDR	Ensembl ID
bta04612	Antigen processing and presentation	7.05501	1.32617e-08	ENSBTAG00000002069;ENSBTAG00000003038;ENSBTAG00000005814;ENSBTAG00000007075;ENSBTAG00000008953;ENSBTAG00000009656;ENSBTAG00000010645;ENSBTAG00000012330;ENSBTAG00000012330;ENSBTAG00000012451;ENSBTAG00000013919;ENSBTAG00000015228;ENSBTAG00000015730;ENSBTAG00000017135;ENSBTAG00000019386;ENSBTAG00000019588;ENSBTAG00000021141;ENSBTAG00000038128
bta04145	Phagosome	4.64801	3.89001e-08	ENSBTAG00000000057;ENSBTAG00000001489;ENSBTAG00000002069;ENSBTAG00000003038;ENSBTAG00000006969;ENSBTAG00000007075;ENSBTAG00000008953;ENSBTAG00000009656;ENSBTAG00000010645;ENSBTAG00000012244;ENSBTAG00000012451;ENSBTAG00000013919;ENSBTAG00000014031;ENSBTAG00000015730;ENSBTAG00000015739;ENSBTAG00000017135;ENSBTAG00000019289;ENSBTAG00000019386;ENSBTAG00000019588;ENSBTAG00000032719;ENSBTAG00000038048;…
bta05332	Graft-versus-host disease	7.00498	0.000114096	ENSBTAG00000002069;ENSBTAG00000007075;ENSBTAG00000009656;ENSBTAG00000010645;ENSBTAG00000012451;ENSBTAG00000013919;ENSBTAG00000015730;ENSBTAG00000019386;ENSBTAG00000019588;ENSBTAG00000038128
bta00260	Glycine, serine and threonine metabolism	6.89094	0.000262854	ENSBTAG00000002321;ENSBTAG00000004112;ENSBTAG00000004118;ENSBTAG00000005586;ENSBTAG00000006795;ENSBTAG00000013081;ENSBTAG00000013178;ENSBTAG00000013960;ENSBTAG00000039719
bta05330	Allograft rejection	5.98607	0.000262854	ENSBTAG00000002069;ENSBTAG00000007075;ENSBTAG00000009656;ENSBTAG00000010645;ENSBTAG00000012451;ENSBTAG00000013919;ENSBTAG00000015730;ENSBTAG00000019386;ENSBTAG00000019588;ENSBTAG00000038128
bta05169	Epstein-Barr virus infection	3.04578	0.000262854	ENSBTAG00000000428;ENSBTAG00000001725;ENSBTAG00000002069;ENSBTAG00000003033;ENSBTAG00000003038;ENSBTAG00000007075;ENSBTAG00000007867;ENSBTAG00000008953;ENSBTAG00000009656;ENSBTAG00000010645;ENSBTAG00000012330;ENSBTAG00000012330;ENSBTAG00000012451;ENSBTAG00000013475;ENSBTAG00000013919;ENSBTAG00000014707;ENSBTAG00000015730;ENSBTAG00000019386;ENSBTAG00000019588;ENSBTAG00000038128;ENSBTAG00000039861
bta04940	Type I diabetes mellitus	5.67645	0.000367208	ENSBTAG00000002069;ENSBTAG00000007075;ENSBTAG00000009656;ENSBTAG00000010645;ENSBTAG00000012451;ENSBTAG00000013919;ENSBTAG00000015730;ENSBTAG00000019386;ENSBTAG00000019588;ENSBTAG00000038128
bta05416	Viral myocarditis	4.96106	0.000436158	ENSBTAG00000001865;ENSBTAG00000002069;ENSBTAG00000007075;ENSBTAG00000009656;ENSBTAG00000010645;ENSBTAG00000012451;ENSBTAG00000013919;ENSBTAG00000015730;ENSBTAG00000019386;ENSBTAG00000019588;ENSBTAG00000038128
bta00100	Steroid biosynthesis	10.3969	0.00050973	ENSBTAG00000001992;ENSBTAG00000003068;ENSBTAG00000004688;ENSBTAG00000005498;ENSBTAG00000009287;ENSBTAG00000016465
bta01100	Metabolic pathways	1.63502	0.000584664	ENSBTAG00000000033;ENSBTAG00000000042;ENSBTAG00000000087;ENSBTAG00000001417;ENSBTAG00000001851;ENSBTAG00000001992;ENSBTAG00000002321;ENSBTAG00000002843;ENSBTAG00000002944;ENSBTAG00000002980;ENSBTAG00000003068;ENSBTAG00000003222;ENSBTAG00000003948;ENSBTAG00000004112;ENSBTAG00000004118;ENSBTAG00000004422;ENSBTAG00000004688;ENSBTAG00000004881;ENSBTAG00000004931;ENSBTAG00000005178;ENSBTAG00000005364;…
TR3 vs. CTR - Downregulatd genes
Pathway ID	Pathway Description	EnrichmentRatio	FDR	Ensembl ID
bta04612	Antigen processing and presentation	6.75017	1.25902e-06	ENSBTAG00000000778;ENSBTAG00000002069;ENSBTAG00000009656;ENSBTAG00000010645;ENSBTAG00000012330;ENSBTAG00000012330;ENSBTAG00000012451;ENSBTAG00000013162;ENSBTAG00000013919;ENSBTAG00000015114;ENSBTAG00000015228;ENSBTAG00000015730;ENSBTAG00000019386;ENSBTAG00000019588;ENSBTAG00000038128
bta05416	Viral myocarditis	6.73167	7.34447e-06	ENSBTAG00000002069;ENSBTAG00000002472;ENSBTAG00000009656;ENSBTAG00000010645;ENSBTAG00000012451;ENSBTAG00000013118;ENSBTAG00000013919;ENSBTAG00000015730;ENSBTAG00000019386;ENSBTAG00000019588;ENSBTAG00000023823;ENSBTAG00000023823;ENSBTAG00000038128
bta05332	Graft-versus-host disease	8.04275	3.18927e-05	ENSBTAG00000002069;ENSBTAG00000009656;ENSBTAG00000010645;ENSBTAG00000012451;ENSBTAG00000013118;ENSBTAG00000013919;ENSBTAG00000015730;ENSBTAG00000019386;ENSBTAG00000019588;ENSBTAG00000038128
bta05169	Epstein-Barr virus infection	3.497	4.18093e-05	ENSBTAG00000002069;ENSBTAG00000002472;ENSBTAG00000003033;ENSBTAG00000009656;ENSBTAG00000010645;ENSBTAG00000012330;ENSBTAG00000012330;ENSBTAG00000012451;ENSBTAG00000013475;ENSBTAG00000013793;ENSBTAG00000013919;ENSBTAG00000014707;ENSBTAG00000015114;ENSBTAG00000015578;ENSBTAG00000015730;ENSBTAG00000019386;ENSBTAG00000019588;ENSBTAG00000021691;ENSBTAG00000023823;ENSBTAG00000023823;ENSBTAG00000038128
bta05330	Allograft rejection	6.8729	8.98239e-05	ENSBTAG00000002069;ENSBTAG00000009656;ENSBTAG00000010645;ENSBTAG00000012451;ENSBTAG00000013118;ENSBTAG00000013919;ENSBTAG00000015730;ENSBTAG00000019386;ENSBTAG00000019588;ENSBTAG00000038128
bta04940	Type I diabetes mellitus	6.5174	0.000124589	ENSBTAG00000002069;ENSBTAG00000009656;ENSBTAG00000010645;ENSBTAG00000012451;ENSBTAG00000013118;ENSBTAG00000013919;ENSBTAG00000015730;ENSBTAG00000019386;ENSBTAG00000019588;ENSBTAG00000038128
bta05168	Herpes simplex infection	3.43645	0.000206864	ENSBTAG00000001879;ENSBTAG00000002069;ENSBTAG00000003012;ENSBTAG00000004322;ENSBTAG00000009656;ENSBTAG00000010645;ENSBTAG00000012451;ENSBTAG00000013475;ENSBTAG00000013919;ENSBTAG00000015228;ENSBTAG00000015730;ENSBTAG00000018768;ENSBTAG00000019386;ENSBTAG00000019588;ENSBTAG00000023823;ENSBTAG00000023823;ENSBTAG00000035370;ENSBTAG00000038128
bta05320	Autoimmune thyroid disease	5.40013	0.000538418	ENSBTAG00000002069;ENSBTAG00000009656;ENSBTAG00000010645;ENSBTAG00000012451;ENSBTAG00000013118;ENSBTAG00000013919;ENSBTAG00000015730;ENSBTAG00000019386;ENSBTAG00000019588;ENSBTAG00000038128
bta05152	Tuberculosis	3.26201	0.000596526	ENSBTAG00000002096;ENSBTAG00000002472;ENSBTAG00000005359;ENSBTAG00000007312;ENSBTAG00000009656;ENSBTAG00000010645;ENSBTAG00000012451;ENSBTAG00000013919;ENSBTAG00000014031;ENSBTAG00000014583;ENSBTAG00000015228;ENSBTAG00000015730;ENSBTAG00000019588;ENSBTAG00000023823;ENSBTAG00000023823;ENSBTAG00000038048;ENSBTAG00000038128
bta05150	Staphylococcus aureus infection	5.57719	0.000820381	ENSBTAG00000002096;ENSBTAG00000009656;ENSBTAG00000010645;ENSBTAG00000011193;ENSBTAG00000012451;ENSBTAG00000013919;ENSBTAG00000015730;ENSBTAG00000019588;ENSBTAG00000038128
