# Supplementary material for: Supranutritional Maternal Organic Selenium Supplementation during Different Trimesters of Pregnancy Affects the Muscle Gene Transcriptome of Newborn Beef Calves in a Time-Dependent Manner
Source: Genes (Basel). 2021 Nov 25;12(12):1884. doi: 10.3390/genes12121884 (PMC8701265; doi:10.3390/genes12121884)
Supplement: Supplementary file 1 [file genes-12-01884-s001.zip › Supplementary Table S10_.xlsx]

## Sheet: Description
Supranutritional Maternal Organic Selenium Supplementation During Different Trimesters of Pregnancy Affects the Muscle Gene Transcriptome of Newborn Beef Calves in a Time-dependent Manner
Wellison J. S. Diniz 1,*; Gerd Bobe 2,3; Joseph J. Klopfenstein 4; Yunus Gultekin 2; T. Zane Davis 5; Alison K. Ward 6; Jean A. Hall 7,*
1 Department of Animal Sciences, Auburn University; Auburn, AL 3849, USA; wzd0027@auburn.edu 2 Department of Animal and Rangeland Sciences, College of Agricultural Sciences, Oregon State University, Corvallis, OR, USA; yunus.gultekin@oregonstate.edu; gerd.bobe@oregonstate.edu 3 Linus Pauling Institute, Oregon State University, Corvallis, OR 97331, USA; 4 Department of Clinical Sciences, Carlson C…
Data Description
Tab 1.	Differentially expressed genes in the same direction shared by all three treatments vs. CTR comparisons.

## Sheet: Tab. 1
Differentially expressed genes in the same direction shared by all three treatments vs. CTR comparisons.
Ensembl ID	Gene Symbol	TR1	TR2	TR3
ENSBTAG00000000328	TPPP2	Up	Up	Up
ENSBTAG00000000671	PARP3	Up	Up	Up
ENSBTAG00000001471	POC1A	Up	Up	Up
ENSBTAG00000001788	PDPN	Up	Up	Up
ENSBTAG00000001864	NR4A3	Up	Up	Up
ENSBTAG00000001936	PCK1	Up	Up	Up
ENSBTAG00000002880	SORBS1	Up	Up	Up
ENSBTAG00000005144	PNPLA2	Up	Up	Up
ENSBTAG00000005897	FNTB	Up	Up	Up
ENSBTAG00000006232	WDR86	Up	Up	Up
ENSBTAG00000006471	OSBPL11	Up	Up	Up
ENSBTAG00000006921	ABCA6	Up	Up	Up
ENSBTAG00000007129	IRAG1	Up	Up	Up
ENSBTAG00000007148	F2	Up	Up	Up
ENSBTAG00000008240	GALNT15	Up	Up	Up
ENSBTAG00000008353	CDKN1A	Up	Up	Up
ENSBTAG00000008385	KLHL36	Up	Up	Up
ENSBTAG00000008545	ATF3	Up	Up	Up
ENSBTAG00000008661	C15H11orf52	Up	Up	Up
ENSBTAG00000008940	NPTX1	Up	Up	Up
ENSBTAG00000009148	GPA33	Up	Up	Up
ENSBTAG00000009655	TNS3	Up	Up	Up
ENSBTAG00000010549	IFRD1	Up	Up	Up
ENSBTAG00000010637	ARSG	Up	Up	Up
ENSBTAG00000010877	ARMC12	Up	Up	Up
ENSBTAG00000011734	ANKRD1	Up	Up	Up
ENSBTAG00000012987	ULK1	Up	Up	Up
ENSBTAG00000013029	ARNTL	Up	Up	Up
ENSBTAG00000013401	ARHGEF40	Up	Up	Up
ENSBTAG00000013513	ATP6V1C1	Up	Up	Up
ENSBTAG00000014132	SNED1	Up	Up	Up
ENSBTAG00000014791	CTH	Up	Up	Up
ENSBTAG00000014881	PHF23	Up	Up	Up
ENSBTAG00000015016	CALCOCO1	Up	Up	Up
ENSBTAG00000015127	SDC4	Up	Up	Up
ENSBTAG00000015655	APBB1	Up	Up	Up
ENSBTAG00000016177	FGL1	Up	Up	Up
ENSBTAG00000016206	MAOA	Up	Up	Up
ENSBTAG00000017592	GPAT3	Up	Up	Up
ENSBTAG00000019076	PAK6	Up	Up	Up
ENSBTAG00000019310	FOXK1	Up	Up	Up
ENSBTAG00000019445	C4H7orf31	Up	Up	Up
ENSBTAG00000019694	ADAM23	Up	Up	Up
ENSBTAG00000020658	LNX1	Up	Up	Up
ENSBTAG00000021287	SLC16A7	Up	Up	Up
ENSBTAG00000021999	CPT1A	Up	Up	Up
ENSBTAG00000022058	ACACB	Up	Up	Up
ENSBTAG00000023929	FOSL2	Up	Up	Up
ENSBTAG00000024929	PPP1R27	Up	Up	Up
ENSBTAG00000026796		Up	Up	Up
ENSBTAG00000029237	5S_rRNA	Up	Up	Up
ENSBTAG00000030208	ERFE	Up	Up	Up
ENSBTAG00000030599	SMOC1	Up	Up	Up
ENSBTAG00000031209	SLC22A4	Up	Up	Up
ENSBTAG00000032517	BCL7A	Up	Up	Up
ENSBTAG00000038286	PPDPFL	Up	Up	Up
ENSBTAG00000038321	LIPE	Up	Up	Up
ENSBTAG00000039686	ACOT11	Up	Up	Up
ENSBTAG00000046677	RTN4R	Up	Up	Up
ENSBTAG00000046980	KLRF2	Up	Up	Up
ENSBTAG00000047502	FKBP5	Up	Up	Up
ENSBTAG00000048011	GPR160	Up	Up	Up
ENSBTAG00000048486	IQANK1	Up	Up	Up
ENSBTAG00000053361	KLHL30	Up	Up	Up
ENSBTAG00000000125	SPATA5	Down	Down	Down
ENSBTAG00000001027	SERPINH1	Down	Down	Down
ENSBTAG00000001094	MTUS2	Down	Down	Down
ENSBTAG00000001143		Down	Down	Down
ENSBTAG00000001308		Down	Down	Down
ENSBTAG00000001922	AKIP1	Down	Down	Down
ENSBTAG00000001938	CKS2	Down	Down	Down
ENSBTAG00000002069	BOLA	Down	Down	Down
ENSBTAG00000002299	SEL1L3	Down	Down	Down
ENSBTAG00000002786		Down	Down	Down
ENSBTAG00000004679	WARS1	Down	Down	Down
ENSBTAG00000005744	COQ2	Down	Down	Down
ENSBTAG00000006026	BEX3	Down	Down	Down
ENSBTAG00000006383		Down	Down	Down
ENSBTAG00000007116	ARRDC3	Down	Down	Down
ENSBTAG00000007363	LSM3	Down	Down	Down
ENSBTAG00000008028	CHN1	Down	Down	Down
ENSBTAG00000009656		Down	Down	Down
ENSBTAG00000010645	BOLA-DRA	Down	Down	Down
ENSBTAG00000011866	PCBD1	Down	Down	Down
ENSBTAG00000011908	CPQ	Down	Down	Down
ENSBTAG00000012007	SOCS2	Down	Down	Down
ENSBTAG00000012330	B2M	Down	Down	Down
ENSBTAG00000012409	POSTN	Down	Down	Down
ENSBTAG00000012451	BOLA-DMB	Down	Down	Down
ENSBTAG00000012674	CNKSR3	Down	Down	Down
ENSBTAG00000012837	COL6A6	Down	Down	Down
ENSBTAG00000012991	PRUNE2	Down	Down	Down
ENSBTAG00000013178	ALAS2	Down	Down	Down
ENSBTAG00000013306	ZBTB7C	Down	Down	Down
ENSBTAG00000013475	TRAF3	Down	Down	Down
ENSBTAG00000013919		Down	Down	Down
ENSBTAG00000014862		Down	Down	Down
ENSBTAG00000015060	GBP5	Down	Down	Down
ENSBTAG00000015066	LANCL1	Down	Down	Down
ENSBTAG00000015228	CD74	Down	Down	Down
ENSBTAG00000015730	BOLA-DMA	Down	Down	Down
ENSBTAG00000015950	ISOC2	Down	Down	Down
ENSBTAG00000016078	STXBP4	Down	Down	Down
ENSBTAG00000016450	CDNF	Down	Down	Down
ENSBTAG00000017071	C1QTNF3	Down	Down	Down
ENSBTAG00000017524	CBLN4	Down	Down	Down
ENSBTAG00000017956	KCTD15	Down	Down	Down
ENSBTAG00000018806	PSRC1	Down	Down	Down
ENSBTAG00000018942	SSX2IP	Down	Down	Down
ENSBTAG00000019018		Down	Down	Down
ENSBTAG00000019347	PLXDC1	Down	Down	Down
ENSBTAG00000019386	BOLA-NC1	Down	Down	Down
ENSBTAG00000019588	BLA-DQB	Down	Down	Down
ENSBTAG00000020344	SLC44A3	Down	Down	Down
ENSBTAG00000020602	IDO1	Down	Down	Down
ENSBTAG00000021298	METTL11B	Down	Down	Down
ENSBTAG00000021516	GSTA1	Down	Down	Down
ENSBTAG00000022489		Down	Down	Down
ENSBTAG00000023429	PLS1	Down	Down	Down
ENSBTAG00000024509	TMEM52	Down	Down	Down
ENSBTAG00000027629		Down	Down	Down
ENSBTAG00000027867		Down	Down	Down
ENSBTAG00000031750	PLAC8B	Down	Down	Down
ENSBTAG00000038048	MRC1	Down	Down	Down
ENSBTAG00000038128	BOLA-DQA5	Down	Down	Down
ENSBTAG00000038938	GBP2	Down	Down	Down
ENSBTAG00000039196		Down	Down	Down
ENSBTAG00000047441		Down	Down	Down
ENSBTAG00000048515		Down	Down	Down
ENSBTAG00000050675	BOLA3	Down	Down	Down
ENSBTAG00000051412	HBA	Down	Down	Down
ENSBTAG00000051519		Down	Down	Down
ENSBTAG00000052878		Down	Down	Down
ENSBTAG00000054592	SCN2B	Down	Down	Down
