# Supplementary material for: Supranutritional Maternal Organic Selenium Supplementation during Different Trimesters of Pregnancy Affects the Muscle Gene Transcriptome of Newborn Beef Calves in a Time-Dependent Manner
Source: Genes (Basel). 2021 Nov 25;12(12):1884. doi: 10.3390/genes12121884 (PMC8701265; doi:10.3390/genes12121884)
Supplement: Supplementary file 1 [file genes-12-01884-s001.zip › Supplementary Table S11_.xlsx]

## Sheet: Description
Supranutritional Maternal Organic Selenium Supplementation During Different Trimesters of Pregnancy Affects the Muscle Gene Transcriptome of Newborn Beef Calves in a Time-dependent Manner
Wellison J. S. Diniz 1,*; Gerd Bobe 2,3; Joseph J. Klopfenstein 4; Yunus Gultekin 2; T. Zane Davis 5; Alison K. Ward 6; Jean A. Hall 7,*
1 Department of Animal Sciences, Auburn University; Auburn, AL 3849, USA; wzd0027@auburn.edu 2 Department of Animal and Rangeland Sciences, College of Agricultural Sciences, Oregon State University, Corvallis, OR, USA; yunus.gultekin@oregonstate.edu; gerd.bobe@oregonstate.edu 3 Linus Pauling Institute, Oregon State University, Corvallis, OR 97331, USA; 4 Department of Clinical Sciences, Carlson C…
Data Description
Tab. 1.	Transcription factors identified as putative regulators of differentially expressed genes in muscle for TR1 vs. CTR based on the RIF1 and RIF2

## Sheet: Tab. 1
Transcription factors identified as putative regulators of differentially expressed genes in muscle for TR1 vs. CTR based on the RIF1 and RIF2
Ensembl ID	Gene Symbol	Family	RIF1	RIF2
ENSBTAG00000039287	ZFP69	zf-C2H2	-2.19113	2.78284
ENSBTAG00000020441	HMG20A	HMG	-1.54712	2.59913
ENSBTAG00000016801	RXRG	RXR-like	0.49954	2.51749
ENSBTAG00000012274	CIZ1	Others	-0.03892	2.48908
ENSBTAG00000006335	STAT6	STAT	-0.7036	2.45297
ENSBTAG00000014697	SMARCC2	MYB	-0.03316	2.41031
ENSBTAG00000033174	TFAP4	bHLH	-0.23379	2.37987
ENSBTAG00000015554	TMF1	Others	-1.46438	2.34998
ENSBTAG00000003514	HSF4	HSF	1.1509	2.34996
ENSBTAG00000010450	WIZ	zf-C2H2	1.29163	2.31684
ENSBTAG00000013253	THAP4	THAP	-2.74687	2.29753
ENSBTAG00000033315	DNAJC1	MYB	-0.69821	2.2927
ENSBTAG00000002216	MYOD1	bHLH	-0.81373	2.27939
ENSBTAG00000013895	RELA	RHD	0.67849	2.26881
ENSBTAG00000003843	SMARCAL1	Others	-1.1563	2.26377
ENSBTAG00000008313	KLF15	zf-C2H2	-1.60376	2.26036
ENSBTAG00000000389	ZNF212	zf-C2H2	-0.13174	2.2402
ENSBTAG00000015101	HMGB2	HMG	-3.40682	2.22411
ENSBTAG00000014967	PAX7	PAX	-1.52521	2.22008
ENSBTAG00000003606	GLI4	zf-C2H2	-1.53366	2.20646
ENSBTAG00000031895	TFB1M	Others	-1.8984	2.18875
ENSBTAG00000003968	UBP1	CP2	0.0478	2.18443
ENSBTAG00000007917	TSHZ2	zf-C2H2	0.57145	2.17653
ENSBTAG00000008132	SOX13	HMG	-3.40348	2.1549
ENSBTAG00000010681	NR1H3	THR-like	1.53533	2.13965
ENSBTAG00000013531	CENPS	Others	0.73778	2.12854
ENSBTAG00000017836	ZFP57	zf-C2H2	-1.66472	2.11111
ENSBTAG00000012416	ZNF511	Others	1.02385	2.10423
ENSBTAG00000004675	ZNF18	zf-C2H2	-2.45573	2.10388
ENSBTAG00000018710	TTF1	MYB	0.26232	2.09521
ENSBTAG00000026307	ZNF629	zf-C2H2	-1.35155	2.08649
ENSBTAG00000040206	ZNF770	zf-C2H2	-0.94243	2.08493
ENSBTAG00000016137	ZNF608	Others	-0.89619	2.07877
ENSBTAG00000006030	MYOG	bHLH	-0.81959	2.07451
ENSBTAG00000025129	MNT	bHLH	0.31369	2.06207
ENSBTAG00000003953	ZNF316	zf-C2H2	0.72324	2.02127
ENSBTAG00000024115	FOXO6	Fork_head	-0.35873	2.01821
ENSBTAG00000009780	GTF2I	GTF2I	-4.02081	1.99292
ENSBTAG00000023929	FOSL2	TF_bZIP	0.75415	1.99097
ENSBTAG00000020819	YY1	zf-C2H2	-0.48761	1.98172
ENSBTAG00000008289	ZBTB4	ZBTB	1.10707	1.97973
ENSBTAG00000043974	ENSBTAG00000043974	zf-C2H2	-4.16265	1.92001
ENSBTAG00000021045	E2F3	E2F	-2.35437	1.86753
ENSBTAG00000003801	MBD1	MBD	-2.50847	1.85325
ENSBTAG00000005524	HBP1	HMG	-2.10944	1.77406
ENSBTAG00000017072	ZNF384	zf-C2H2	-3.29293	1.73917
ENSBTAG00000013142	MYNN	ZBTB	-2.03606	1.71842
ENSBTAG00000021742	ZNF568	zf-C2H2	-2.44206	1.61858
ENSBTAG00000006222	TFDP2	E2F	-2.0974	1.4935
ENSBTAG00000019255	NFE2L2	TF_bZIP	-2.40021	1.42916
ENSBTAG00000021329	ZBTB3	ZBTB	-2.25188	1.41919
ENSBTAG00000018199	ZBTB8A	ZBTB	-2.22202	1.37633
ENSBTAG00000004139	BACH1	TF_bZIP	-2.12984	1.34037
ENSBTAG00000011234	FOXO3	Fork_head	-2.37572	1.33241
ENSBTAG00000015904	RORA	THR-like	-3.21381	1.30834
ENSBTAG00000011957	CREBL2	Others	-3.59504	1.28021
ENSBTAG00000032982	TERF1	MYB	-3.95271	1.27978
ENSBTAG00000006679	MITF	bHLH	-2.25482	1.26813
ENSBTAG00000016721	ENSBTAG00000016721	zf-C2H2	-5.72195	1.2091
ENSBTAG00000038034	ZNF628	zf-C2H2	-2.21662	1.16122
ENSBTAG00000000222	ARID4B	ARID	-2.37562	1.0993
ENSBTAG00000013271	NCOR1	MYB	-2.70785	1.09539
ENSBTAG00000012211	HOXA5	Homeobox	-2.46034	1.0733
ENSBTAG00000008138	HOXA2	Homeobox	-2.02608	1.05626
ENSBTAG00000039075	ZNF527	zf-C2H2	-2.71922	1.00215
ENSBTAG00000001333	PPARG	THR-like	-2.8455	0.92078
ENSBTAG00000009046	TBX6	T-box	-2.06924	0.91284
ENSBTAG00000020004	ZNF800	zf-C2H2	-3.06858	0.82935
ENSBTAG00000018495	NKX6-3	Homeobox	-2.81048	0.7359
ENSBTAG00000014217	HHEX	Homeobox	-2.13005	0.69437
ENSBTAG00000019357	ZNF688	zf-C2H2	-2.17437	0.42302
ENSBTAG00000021494	EN1	Homeobox	-3.4997	0.4121
ENSBTAG00000014692	CREB3L4	TF_bZIP	-2.73422	0.3591
ENSBTAG00000023847	IKZF5	zf-C2H2	-2.4092	0.19454
ENSBTAG00000038240	ENSBTAG00000038240	zf-C2H2	-2.62173	0.18967
ENSBTAG00000038674	ZNF677	zf-C2H2	-2.1335	0.11425
ENSBTAG00000011518	RARB	THR-like	-3.06159	0.03813
ENSBTAG00000012738	ZNF827	zf-C2H2	-2.63407	-0.00022
ENSBTAG00000014751	ZIC1	zf-C2H2	-2.89557	-0.05048
ENSBTAG00000045912	ENSBTAG00000045912	zf-C2H2	-2.67232	-0.106
ENSBTAG00000005572	ZNF205	zf-C2H2	-2.58083	-0.2048
ENSBTAG00000008182	FOSB	TF_bZIP	-2.39439	-0.28886
ENSBTAG00000024657	ENSBTAG00000024657	zf-C2H2	-2.1089	-0.31475
ENSBTAG00000003064	PAXBP1	GCFC	-2.39441	-0.31923
ENSBTAG00000014560	HLX	Homeobox	-3.28607	-0.54088
ENSBTAG00000033523	ENSBTAG00000033523	zf-C2H2	-2.72298	-1.00172
