# Supplementary material for: Supranutritional Maternal Organic Selenium Supplementation during Different Trimesters of Pregnancy Affects the Muscle Gene Transcriptome of Newborn Beef Calves in a Time-Dependent Manner
Source: Genes (Basel). 2021 Nov 25;12(12):1884. doi: 10.3390/genes12121884 (PMC8701265; doi:10.3390/genes12121884)
Supplement: Supplementary file 1 [file genes-12-01884-s001.zip › Supplementary Table S12_.xlsx]

## Sheet: Description
Supranutritional Maternal Organic Selenium Supplementation During Different Trimesters of Pregnancy Affects the Muscle Gene Transcriptome of Newborn Beef Calves in a Time-dependent Manner
Wellison J. S. Diniz 1,*; Gerd Bobe 2,3; Joseph J. Klopfenstein 4; Yunus Gultekin 2; T. Zane Davis 5; Alison K. Ward 6; Jean A. Hall 7,*
1 Department of Animal Sciences, Auburn University; Auburn, AL 3849, USA; wzd0027@auburn.edu 2 Department of Animal and Rangeland Sciences, College of Agricultural Sciences, Oregon State University, Corvallis, OR, USA; yunus.gultekin@oregonstate.edu; gerd.bobe@oregonstate.edu 3 Linus Pauling Institute, Oregon State University, Corvallis, OR 97331, USA; 4 Department of Clinical Sciences, Carlson C…
Data Description
Tab. 1.	Transcription factors identified as putative regulators of differentially expressed genes in muscle for TR2 vs. CTR based on the RIF1 and RIF2

## Sheet: Tab. 1
Transcription factors identified as putative regulators of differentially expressed genes in muscle for TR2 vs. CTR based on the RIF1 and RIF2
Ensembl ID	Gene Symbol	Family	RIF1	RIF2
ENSBTAG00000018488	AFF1	AF-4	-2.17111	1.31299
ENSBTAG00000014090	ARID5A	ARID	-2.72799	2.61924
ENSBTAG00000013029	ARNTL	bHLH	-4.40321	0.15255
ENSBTAG00000016462	TCF4	bHLH	-2.07219	-0.07348
ENSBTAG00000024000	ATOH8	bHLH	0.58451	2.45012
ENSBTAG00000033174	TFAP4	bHLH	1.26325	1.96489
ENSBTAG00000016103	CBFB	CBF	-0.56285	2.16876
ENSBTAG00000008591	CAMTA2	CG-1	1.84437	2.16824
ENSBTAG00000037757	EBF4	COE	-2.73297	1.76135
ENSBTAG00000003968	UBP1	CP2	1.01011	2.14556
ENSBTAG00000019312	TFCP2	CP2	1.74259	2.7073
ENSBTAG00000003845	CSRNP1	CSRNP_N	-0.08209	2.11206
ENSBTAG00000010928	CSRNP2	CSRNP_N	-1.75811	2.38546
ENSBTAG00000018229	NFIX	CTF/NFI	-0.35793	2.08144
ENSBTAG00000021045	E2F3	E2F	-2.6552	0.75528
ENSBTAG00000004953	ELK4	ETS	-0.24505	2.08481
ENSBTAG00000019061	ELF4	ETS	-2.76916	-0.43466
ENSBTAG00000008501	FOXD3	Fork_head	-2.59116	-0.13939
ENSBTAG00000019310	FOXK1	Fork_head	2.0445	0.29224
ENSBTAG00000046684	FOXN3	Fork_head	2.7087	2.19711
ENSBTAG00000009780	GTF2I	GTF2I	-2.35198	1.08136
ENSBTAG00000001002	TCF7	HMG	2.59695	-0.48458
ENSBTAG00000003546	TFAM	HMG	-2.65086	-0.58148
ENSBTAG00000005067	UBTF	HMG	2.13577	-0.69195
ENSBTAG00000010111	TCF7L1	HMG	-2.92358	0.32483
ENSBTAG00000015308	SMARCE1	HMG	-0.10001	2.14426
ENSBTAG00000020441	HMG20A	HMG	-0.62867	2.93229
ENSBTAG00000003278	HOXC10	Homeobox	-0.22983	-2.09402
ENSBTAG00000009059	PITX2	Homeobox	-2.90538	-1.3196
ENSBTAG00000013801	PBX1	Homeobox	0.14885	2.25317
ENSBTAG00000015702	PITX3	Homeobox	-0.9573	2.37387
ENSBTAG00000015840	HOXD1	Homeobox	-2.69535	0.04266
ENSBTAG00000040082	HOXA10	Homeobox	-0.49387	-1.96351
ENSBTAG00000012946	HSF2	HSF	-1.98064	2.10345
ENSBTAG00000007617	TERF2	MYB	1.69597	2.16034
ENSBTAG00000014697	SMARCC2	MYB	1.02196	2.3988
ENSBTAG00000024603	NCOR2	MYB	-1.87622	2.49221
ENSBTAG00000033315	DNAJC1	MYB	0.02077	2.21566
ENSBTAG00000007802	BCLAF1	Others	-3.18017	1.94037
ENSBTAG00000012416	ZNF511	Others	1.21641	2.05015
ENSBTAG00000013531	CENPS	Others	1.99782	1.72127
ENSBTAG00000019615	PHTF1	Others	-0.03259	2.59484
ENSBTAG00000039770	CEBPZ	Others	2.65082	0.99705
ENSBTAG00000013895	RELA	RHD	-0.71099	2.16774
ENSBTAG00000016801	RXRG	RXR-like	0.63433	2.057
ENSBTAG00000007767	TBX15	T-box	0.40361	-2.08665
ENSBTAG00000018161	TBX18	T-box	2.13377	0.20238
ENSBTAG00000000040	MAFG	TF_bZIP	-1.8608	2.03511
ENSBTAG00000000455	CREBZF	TF_bZIP	-2.07169	0.36493
ENSBTAG00000003396	MAFB	TF_bZIP	-2.49438	1.43918
ENSBTAG00000013653	NFE2L1	TF_bZIP	-2.26381	1.50295
ENSBTAG00000019303	MAFK	TF_bZIP	-2.09155	1.68575
ENSBTAG00000021435	MAFF	TF_bZIP	-2.16394	2.805
ENSBTAG00000011214	THAP3	THAP	-2.93304	1.39507
ENSBTAG00000007592	RARG	THR-like	0.74911	2.21942
ENSBTAG00000010745	THRA	THR-like	-2.06226	1.97525
ENSBTAG00000016414	VDR	THR-like	-0.31683	2.02768
ENSBTAG00000000385	ZBTB18	ZBTB	2.04806	1.43872
ENSBTAG00000011928	ZBTB20	ZBTB	-2.2859	0.86091
ENSBTAG00000013306	ZBTB7C	ZBTB	0.32265	2.46277
ENSBTAG00000020117	ZBTB7A	ZBTB	-0.42485	2.20364
ENSBTAG00000000195	ENSBTAG00000000195	zf-C2H2	-3.06502	0.97489
ENSBTAG00000000868	ZFP1	zf-C2H2	-2.75712	0.54052
ENSBTAG00000003953	ZNF316	zf-C2H2	2.08519	0.20965
ENSBTAG00000004193	VEZF1	zf-C2H2	-2.06973	-0.20563
ENSBTAG00000004675	ZNF18	zf-C2H2	-0.32022	2.35993
ENSBTAG00000005980	RREB1	zf-C2H2	0.14489	2.34811
ENSBTAG00000007983	ZNF775	zf-C2H2	-2.3862	2.63261
ENSBTAG00000009072	ZNF572	zf-C2H2	-2.03339	0.91951
ENSBTAG00000009521	ZNF565	zf-C2H2	1.32021	2.25
ENSBTAG00000012522	ZNF283	zf-C2H2	-3.45822	1.068
ENSBTAG00000012738	ZNF827	zf-C2H2	-1.55969	1.98869
ENSBTAG00000013050	ZNF277	zf-C2H2	-3.55869	0.78755
ENSBTAG00000013353	ZNF274	zf-C2H2	2.10977	0.56538
ENSBTAG00000015321	TRERF1	zf-C2H2	2.68896	1.41636
ENSBTAG00000017365	ZBTB47	zf-C2H2	-2.16374	1.36475
ENSBTAG00000019293	EGR3	zf-C2H2	-2.74419	0.37477
ENSBTAG00000019881	ENSBTAG00000019881	zf-C2H2	-0.4752	2.52128
ENSBTAG00000020327	ZNF410	zf-C2H2	-3.3697	1.04349
ENSBTAG00000020552	PRDM2	zf-C2H2	2.68249	-0.91349
ENSBTAG00000026307	ZNF629	zf-C2H2	-2.22821	2.63595
ENSBTAG00000027557	ZNF408	zf-C2H2	0.32472	2.14582
ENSBTAG00000031874	ZNF165	zf-C2H2	1.97871	-0.88446
ENSBTAG00000037581	MZF1	zf-C2H2	-2.86678	-0.19638
ENSBTAG00000043974	ENSBTAG00000043974	zf-C2H2	-1.54945	1.99271
ENSBTAG00000046218	KLF11	zf-C2H2	-2.68356	0.52059
ENSBTAG00000046301	ZNF445	zf-C2H2	-2.75055	0.73248
ENSBTAG00000047606	ENSBTAG00000047606	zf-GATA	-0.54501	1.96399
ENSBTAG00000005622	LITAF	zf-LITAF-like	-2.10852	1.87769
ENSBTAG00000011997	ZMIZ2	zf-MIZ	-2.812	1.891
