# Supplementary material for: Supranutritional Maternal Organic Selenium Supplementation during Different Trimesters of Pregnancy Affects the Muscle Gene Transcriptome of Newborn Beef Calves in a Time-Dependent Manner
Source: Genes (Basel). 2021 Nov 25;12(12):1884. doi: 10.3390/genes12121884 (PMC8701265; doi:10.3390/genes12121884)
Supplement: Supplementary file 1 [file genes-12-01884-s001.zip › Supplementary Table S13_.xlsx]

## Sheet: Description
Supranutritional Maternal Organic Selenium Supplementation During Different Trimesters of Pregnancy Affects the Muscle Gene Transcriptome of Newborn Beef Calves in a Time-dependent Manner
Wellison J. S. Diniz 1,*; Gerd Bobe 2,3; Joseph J. Klopfenstein 4; Yunus Gultekin 2; T. Zane Davis 5; Alison K. Ward 6; Jean A. Hall 7,*
1 Department of Animal Sciences, Auburn University; Auburn, AL 3849, USA; wzd0027@auburn.edu 2 Department of Animal and Rangeland Sciences, College of Agricultural Sciences, Oregon State University, Corvallis, OR, USA; yunus.gultekin@oregonstate.edu; gerd.bobe@oregonstate.edu 3 Linus Pauling Institute, Oregon State University, Corvallis, OR 97331, USA; 4 Department of Clinical Sciences, Carlson C…
Data Description
Tab. 1.	Transcription factors identified as putative regulators of differentially expressed genes in muscle for TR3 vs. CTR based on the RIF1 and RIF2

## Sheet: Tab. 1
Transcription factors identified as putative regulators of differentially expressed genes in muscle for TR3 vs. CTR based on the RIF1 and RIF2
Ensembl ID	Gene Symbol	Family	RIF1	RIF2
ENSBTAG00000002216	MYOD1	bHLH	0.84134	2.41136
ENSBTAG00000009816	SCX	bHLH	-2.87868	-0.26671
ENSBTAG00000019329	LYL1	bHLH	0.47067	1.9992
ENSBTAG00000021187	ID2	bHLH	2.82897	-0.76637
ENSBTAG00000018229	NFIX	CTF/NFI	-0.05985	2.08154
ENSBTAG00000019645	TFDP1	E2F	-1.48246	-2.10786
ENSBTAG00000008333	ETV4	ETS	-0.02451	-2.10866
ENSBTAG00000019043	GABPA	ETS	2.55727	-1.33168
ENSBTAG00000004879	FOXO4	Fork_head	-1.96092	0.24058
ENSBTAG00000009206	FOXS1	Fork_head	0.76246	-2.17154
ENSBTAG00000000375	SSRP1	HMG	-1.34035	-2.11483
ENSBTAG00000008132	SOX13	HMG	2.34767	0.92632
ENSBTAG00000014786	PBRM1	HMG	2.47135	0.76074
ENSBTAG00000020737	SOX8	HMG	1.19697	-2.02598
ENSBTAG00000004159	SIX2	Homeobox	-2.11639	-1.52033
ENSBTAG00000004468	BARX1	Homeobox	2.00698	2.00823
ENSBTAG00000004570	PRRX1	Homeobox	-0.35455	2.25837
ENSBTAG00000004838	IRX5	Homeobox	-2.33081	-0.46433
ENSBTAG00000005230	SHOX2	Homeobox	2.86056	-0.01868
ENSBTAG00000005525	LHX6	Homeobox	2.60409	1.17518
ENSBTAG00000006862	MEIS3	Homeobox	0.90801	2.09269
ENSBTAG00000012139	SIX1	Homeobox	2.05814	0.16615
ENSBTAG00000014217	HHEX	Homeobox	-2.39005	-2.62235
ENSBTAG00000014421	PBX2	Homeobox	0.28074	2.38769
ENSBTAG00000017594	ZHX3	Homeobox	0.173	2.3453
ENSBTAG00000012946	HSF2	HSF	-0.00457	2.48657
ENSBTAG00000010002	IRF2	IRF	2.00322	-1.36757
ENSBTAG00000031214	ENSBTAG00000031214	IRF	0.91669	-2.33605
ENSBTAG00000031231	IRF1	IRF	2.58615	-1.62417
ENSBTAG00000040244	APOL3	LRRFIP	1.9625	-1.00374
ENSBTAG00000002292	SMARCA1	MYB	0.23	2.53282
ENSBTAG00000013271	NCOR1	MYB	2.653	0.28528
ENSBTAG00000013961	MYSM1	MYB	0.70189	2.40151
ENSBTAG00000001292	LTF	Others	3.38042	-0.55884
ENSBTAG00000003711	EPAS1	Others	2.22898	-2.68361
ENSBTAG00000009272	MIDEAS	Others	2.22843	0.02305
ENSBTAG00000012159	CNBP	Others	2.58652	0.17744
ENSBTAG00000012416	ZNF511	Others	0.90654	1.96131
ENSBTAG00000015406	ZNF750	Others	2.46354	1.23543
ENSBTAG00000016546	PARP12	Others	1.78398	-2.4656
ENSBTAG00000020166	ZNFX1	Others	1.96368	-2.05919
ENSBTAG00000021743	ZNF704	Others	-0.18695	-2.11937
ENSBTAG00000031895	TFB1M	Others	0.73896	2.19656
ENSBTAG00000039770	CEBPZ	Others	-2.0657	-2.13751
ENSBTAG00000045744	NKRF	Others	-2.14141	-0.741
ENSBTAG00000004368	NFATC3	RHD	0.33524	1.98653
ENSBTAG00000006366	NFATC4	RHD	2.43139	1.58183
ENSBTAG00000013716	NR2C2	RXR-like	-2.36305	-2.81208
ENSBTAG00000007867	STAT1	STAT	2.32979	-1.18058
ENSBTAG00000021523	STAT3	STAT	3.60073	2.71619
ENSBTAG00000016349	TEAD2	TEA	4.23776	1.05858
ENSBTAG00000005227	ATF6	TF_bZIP	-1.88394	-2.21304
ENSBTAG00000018909	CREB5	TF_bZIP	0.13226	2.37517
ENSBTAG00000031544	DDIT3	TF_bZIP	2.79202	0.61301
ENSBTAG00000011518	RARB	THR-like	2.77641	-0.49375
ENSBTAG00000017802	THRB	THR-like	1.3055	-2.57874
ENSBTAG00000047739	TSC22D1	TSC22	1.68307	-2.43835
ENSBTAG00000016829	ZBTB22	ZBTB	2.01817	1.11171
ENSBTAG00000038610	ZBTB26	ZBTB	2.08028	-0.81065
ENSBTAG00000003120	ZNF385B	zf-C2H2	1.22398	2.22132
ENSBTAG00000003575	ZKSCAN4	zf-C2H2	-2.40357	0.05909
ENSBTAG00000005572	ZNF205	zf-C2H2	2.40602	-0.74093
ENSBTAG00000005980	RREB1	zf-C2H2	0.22241	2.58152
ENSBTAG00000006650	ZNF668	zf-C2H2	-2.04158	-0.24851
ENSBTAG00000007488	ZFP90	zf-C2H2	-2.06078	0.58201
ENSBTAG00000008175	ZNF713	zf-C2H2	-1.97982	-0.30594
ENSBTAG00000008397	ZNF555	zf-C2H2	0.2372	-2.94779
ENSBTAG00000008836	ZNF782	zf-C2H2	2.08467	-0.09275
ENSBTAG00000012636	IKZF4	zf-C2H2	0.40826	1.98512
ENSBTAG00000013001	ZNF84	zf-C2H2	-0.93845	-2.9445
ENSBTAG00000013740	SP2	zf-C2H2	-0.27974	-2.42777
ENSBTAG00000014123	ZNF507	zf-C2H2	-2.40104	-1.6564
ENSBTAG00000015348	ZNF189	zf-C2H2	-3.3177	-1.36526
ENSBTAG00000017528	SNAI3	zf-C2H2	-0.35628	-2.84694
ENSBTAG00000017613	ZNF419	zf-C2H2	-2.23049	-0.66933
ENSBTAG00000019881	ENSBTAG00000019881	zf-C2H2	-0.47019	2.10585
ENSBTAG00000021253	PRDM15	zf-C2H2	2.08066	2.54784
ENSBTAG00000021742	ZNF568	zf-C2H2	-1.44581	-2.07433
ENSBTAG00000026523	PLAGL1	zf-C2H2	3.18508	0.28507
ENSBTAG00000031687	ENSBTAG00000031687	zf-C2H2	-2.34776	-1.99853
ENSBTAG00000033523	ENSBTAG00000033523	zf-C2H2	0.5627	-1.97279
ENSBTAG00000033642	ENSBTAG00000033642	zf-C2H2	-2.0758	-1.47909
ENSBTAG00000038322	ENSBTAG00000038322	zf-C2H2	-2.26524	-1.63629
ENSBTAG00000038487	ZNF613	zf-C2H2	2.01617	-1.42853
ENSBTAG00000038541	ZNF879	zf-C2H2	2.48636	-0.31919
ENSBTAG00000038635	ENSBTAG00000038635	zf-C2H2	2.02359	0.17266
ENSBTAG00000039075	ZNF527	zf-C2H2	0.82285	-2.08914
ENSBTAG00000039782	ZNF12	zf-C2H2	-1.04558	-2.01363
ENSBTAG00000040206	ZNF770	zf-C2H2	1.16417	2.69055
ENSBTAG00000040209	ZNF112	zf-C2H2	0.17545	-2.64246
ENSBTAG00000043974	ENSBTAG00000043974	zf-C2H2	2.55191	0.56274
ENSBTAG00000046481	ZNF740	zf-C2H2	1.72188	2.33699
