# Supplementary material for: Supranutritional Maternal Organic Selenium Supplementation during Different Trimesters of Pregnancy Affects the Muscle Gene Transcriptome of Newborn Beef Calves in a Time-Dependent Manner
Source: Genes (Basel). 2021 Nov 25;12(12):1884. doi: 10.3390/genes12121884 (PMC8701265; doi:10.3390/genes12121884)
Supplement: Supplementary file 1 [file genes-12-01884-s001.zip › Supplementary Table S14_.xlsx]

## Sheet: Description
Supranutritional Maternal Organic Selenium Supplementation During Different Trimesters of Pregnancy Affects the Muscle Gene Transcriptome of Newborn Beef Calves in a Time-dependent Manner
Wellison J. S. Diniz 1,*; Gerd Bobe 2,3; Joseph J. Klopfenstein 4; Yunus Gultekin 2; T. Zane Davis 5; Alison K. Ward 6; Jean A. Hall 7,*
1 Department of Animal Sciences, Auburn University; Auburn, AL 3849, USA; wzd0027@auburn.edu 2 Department of Animal and Rangeland Sciences, College of Agricultural Sciences, Oregon State University, Corvallis, OR, USA; yunus.gultekin@oregonstate.edu; gerd.bobe@oregonstate.edu 3 Linus Pauling Institute, Oregon State University, Corvallis, OR 97331, USA; 4 Department of Clinical Sciences, Carlson C…
Data Description
Tab. 1.	Transcription factors identified as differentially expressed and potential key regulators based on the Regulatory Impact Factor metrics.

## Sheet: Tab. 1
Transcription factors identified as differentially expressed and potential key regulators based on the Regulatory Impact Factor metrics.
Group	Ensembl ID	Gene Symbol	RIF1	RIF2	FC
TR1	ENSBTAG00000033315	DNAJC1	-0.69821	2.2927	2.18961
	ENSBTAG00000008313	KLF15	-1.60376	2.26036	2.45865
	ENSBTAG00000017836	ZFP57	-1.66472	2.11111	1.87249
	ENSBTAG00000016137	ZNF608	-0.89619	2.07877	-2.54007
	ENSBTAG00000006030	MYOG	-0.81959	2.07451	-2.1464
	ENSBTAG00000025129	MNT	0.31369	2.06207	2.46868
	ENSBTAG00000023929	FOSL2	0.75415	1.99097	1.52417
	ENSBTAG00000021045	E2F3	-2.35437	1.86753	-2.18753
	ENSBTAG00000005524	HBP1	-2.10944	1.77406	1.53952
	ENSBTAG00000006222	TFDP2	-2.0974	1.4935	2.43291
	ENSBTAG00000011234	FOXO3	-2.37572	1.33241	1.8264
	ENSBTAG00000008138	HOXA2	-2.02608	1.05626	1.70063
	ENSBTAG00000014751	ZIC1	-2.89557	-0.05048	-1.60546
TR2	ENSBTAG00000013029	ARNTL	-4.40321	0.15255	2.68152
	ENSBTAG00000024000	ATOH8	0.58451	2.45012	3.72442
	ENSBTAG00000033174	TFAP4	1.26325	1.96489	2.95053
	ENSBTAG00000016103	CBFB	-0.56285	2.16876	2.05999
	ENSBTAG00000003845	CSRNP1	-0.08209	2.11206	3.25669
	ENSBTAG00000019310	FOXK1	2.0445	0.29224	1.59148
	ENSBTAG00000003278	HOXC10	-0.22983	-2.09402	4.68416
	ENSBTAG00000013801	PBX1	0.14885	2.25317	-1.58948
	ENSBTAG00000015702	PITX3	-0.9573	2.37387	3.64001
	ENSBTAG00000040082	HOXA10	-0.49387	-1.96351	2.4154
	ENSBTAG00000012946	HSF2	-1.98064	2.10345	1.68638
	ENSBTAG00000024603	NCOR2	-1.87622	2.49221	1.59099
	ENSBTAG00000033315	DNAJC1	0.02077	2.21566	1.95396
	ENSBTAG00000016801	RXRG	0.63433	2.057	-1.53737
	ENSBTAG00000021435	MAFF	-2.16394	2.805	2.62992
	ENSBTAG00000016414	VDR	-0.31683	2.02768	-1.93944
	ENSBTAG00000013306	ZBTB7C	0.32265	2.46277	-2.11495
	ENSBTAG00000012738	ZNF827	-1.55969	1.98869	-1.85499
	ENSBTAG00000019881	ENSBTAG00000019881	-0.4752	2.52128	2.75537
	ENSBTAG00000046218	KLF11	-2.68356	0.52059	2.44054
	ENSBTAG00000005622	LITAF	-2.10852	1.87769	2.82037
TR3	ENSBTAG00000002216	MYOD1	0.84134	2.41136	3.44298
	ENSBTAG00000008333	ETV4	-0.02451	-2.10866	2.40598
	ENSBTAG00000020737	SOX8	1.19697	-2.02598	1.9836
	ENSBTAG00000015406	ZNF750	2.46354	1.23543	2.70709
	ENSBTAG00000016546	PARP12	1.78398	-2.4656	-1.58097
	ENSBTAG00000013716	NR2C2	-2.36305	-2.81208	1.85384
	ENSBTAG00000012636	IKZF4	0.40826	1.98512	1.53568
	ENSBTAG00000033642	ENSBTAG00000033642	-2.0758	-1.47909	-2.39253
